# Supplementary material for: Higher-Order Structure of Adeno-Associated Virus Serotype 8 by Hydrogen/Deuterium Exchange Mass Spectrometry
Source: MDPI journal article supplement (doi:10.3390/v16040585), 2024-04-10
Supplement: s1 [file s1]

**AAV8\_VP1 1-13:  
M\*AADGYLPDWLED (#1)**

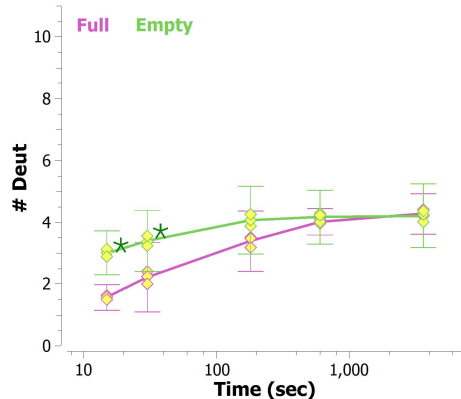

**AAV8\_VP1 1-14:  
M\*AADGYLPDWLEDN (#2)**

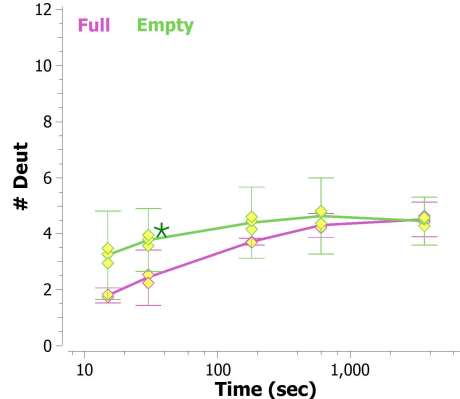

**AAV8\_VP1 11-15: LEDNL (#3)**

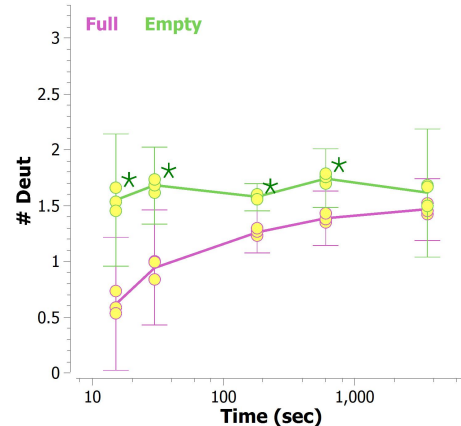

**AAV8\_VP1 12-17: EDNLSE (#4)**

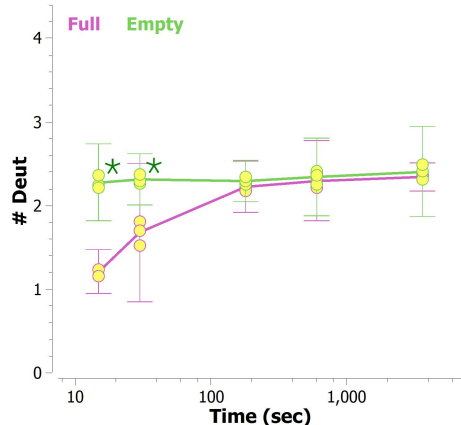

**AAV8\_VP1 12-18: EDNLSEG (#5)**

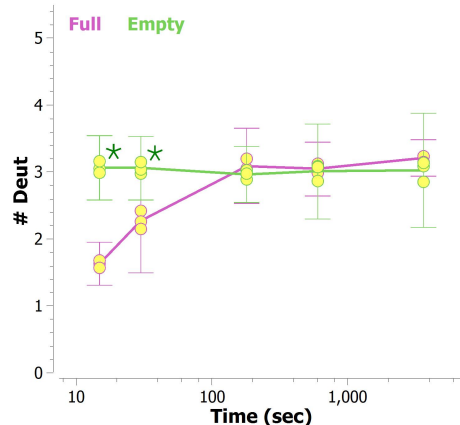

**AAV8\_VP1 12-21: EDNLSEGIRE  
(#6)**

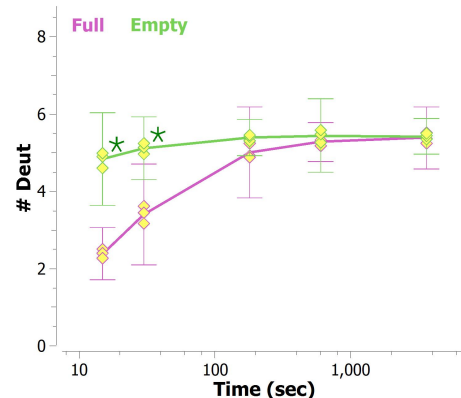

**AAV8\_VP1 14-17: NLSE (#7)**

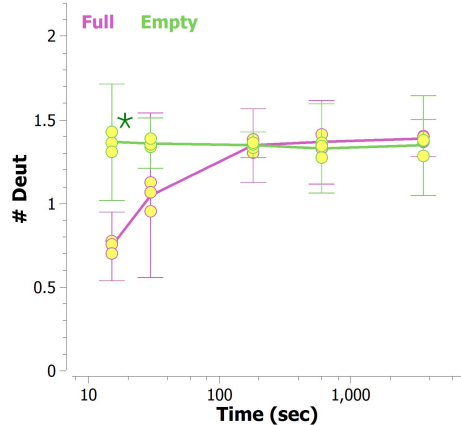

**AAV8\_VP1 16-21: SEGIRE (#8)**

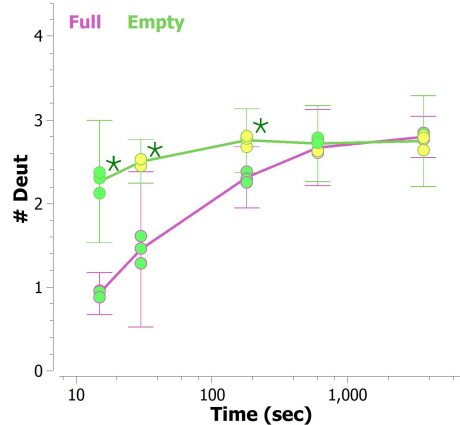

**AAV8\_VP1 16-22: SEGIREW (#9)**

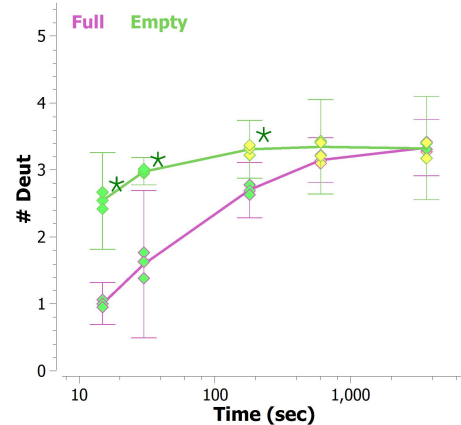

**AAV8\_VP1 16-44:  
GIREWWALKPGAPKPKANQQKQDDG  
(#10)**

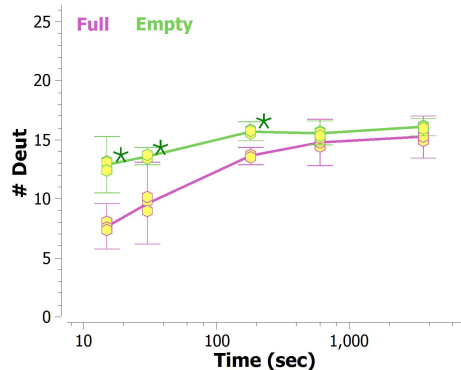

**AAV8\_VP1 19-44:  
REWWALKPGAPKPKANQQKQDDGR  
(#11)**

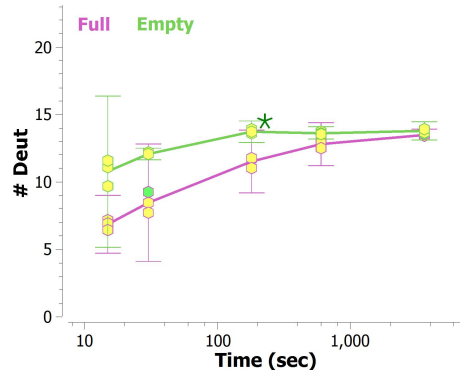

**AAV8\_VP1 23-44:  
WALKPGAPKPKANQQKQDDGRG  
(#12)**

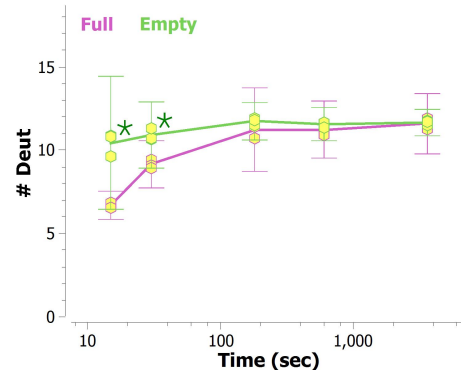

**AAV8\_VP1 68-73: ADAAAL (#13)**

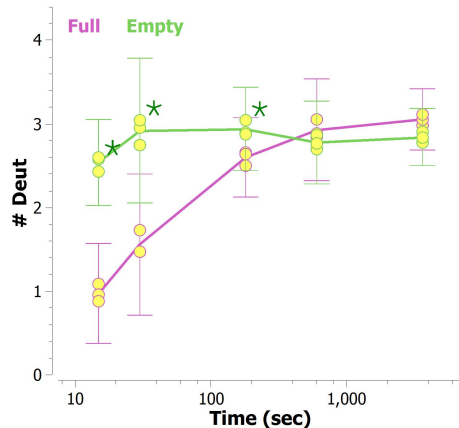

**AAV8\_VP1 68-83: ADAAALEHDKAYDQQL (#14)**

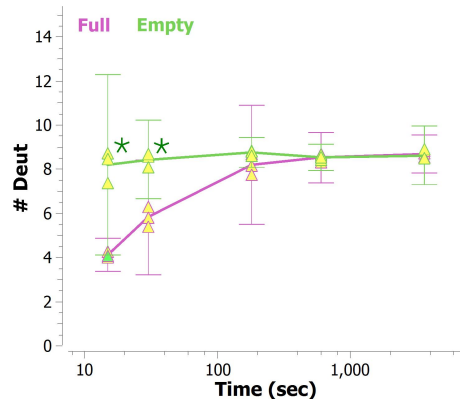

**AAV8\_VP1 70-100: LEHDKAYDQQLQAGDNPYLRYNHAD (#15)**

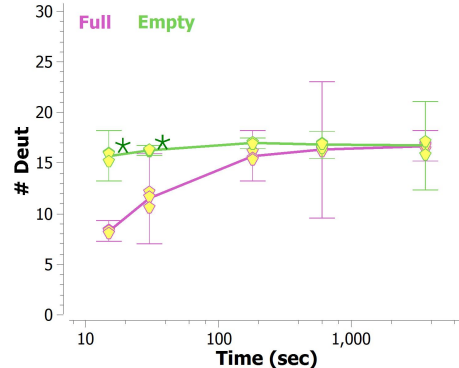

**AAV8\_VP1 71-78: AALEHDKA (#16)**

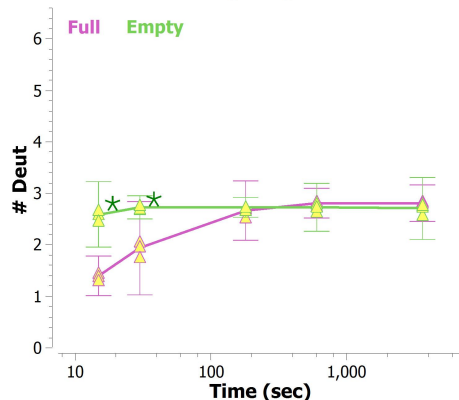

**AAV8\_VP1 71-83: AALEHDKAYDQQL (#17)**

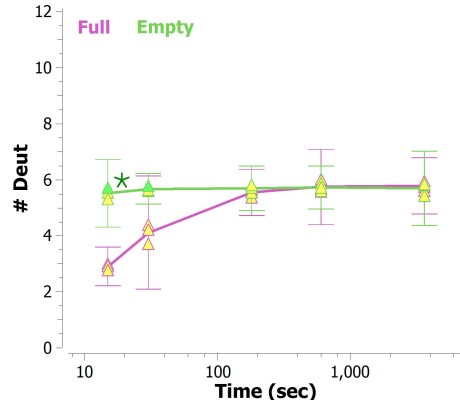

**AAV8\_VP1 71-96: AALEHDKAYDQQLQAGDNPYLRYNHA (#18)**

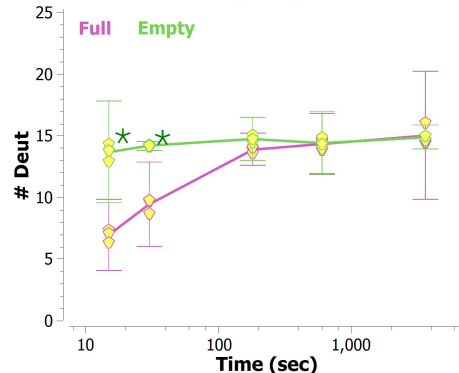

**AAV8\_VP1 71-99: LEHDKAYDQQLQAGDNPYLRYNHAD (#19)**

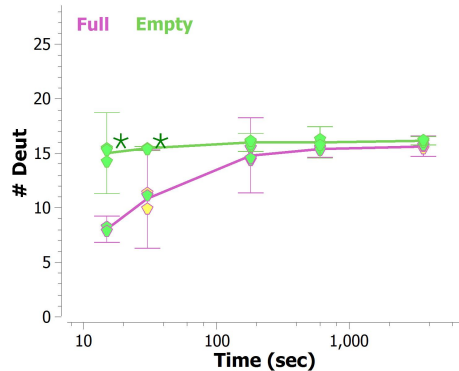

**AAV8\_VP1 71-100: LEHDKAYDQQLQAGDNPYLRYNHADA (#20)**

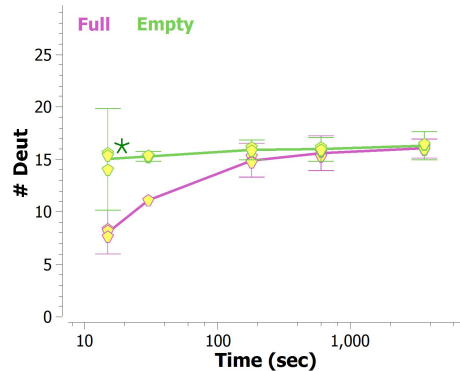

**AAV8\_VP1 73-83: LEHDKAYDQQL (#21)**

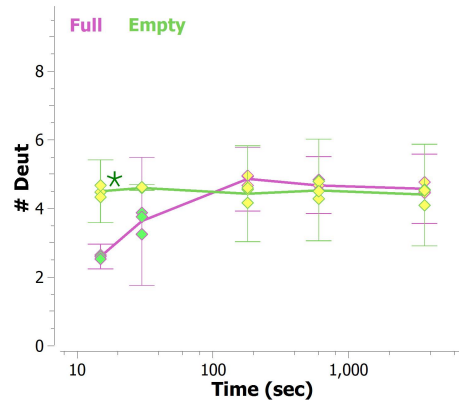

**AAV8\_VP1 73-96: LEHDKAYDQQLQAGDNPYLRYNHA (#22)**

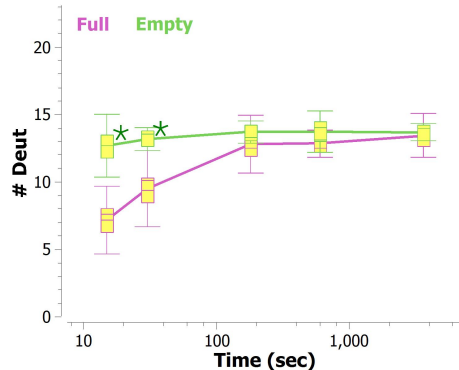

**AAV8\_VP1 73-99: EHDKAYDQQLQAGDNPYLRYNHADA (#23)**

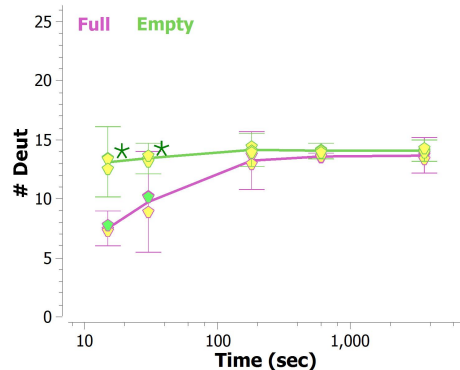

**AAV8\_VP1 73-100: EHDKAYDQQLQAGDNPYLRYNHADA (#24)**

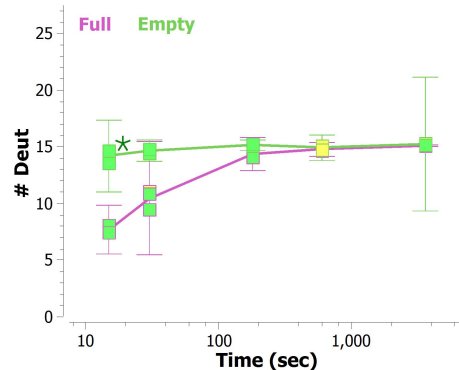



**AAV8\_VP1 74-83: EHDKAYDQQL**  
**(#25)**

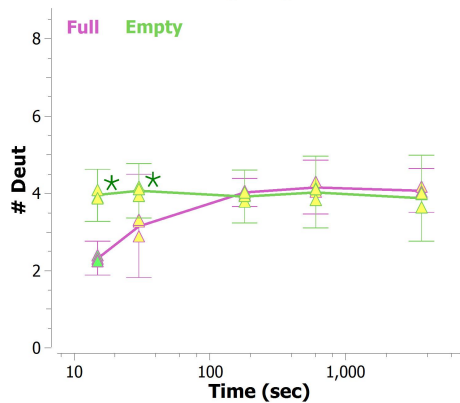

**AAV8\_VP1 74-91:  
EHDKAYDQQLQAGDNPYL (#26)**

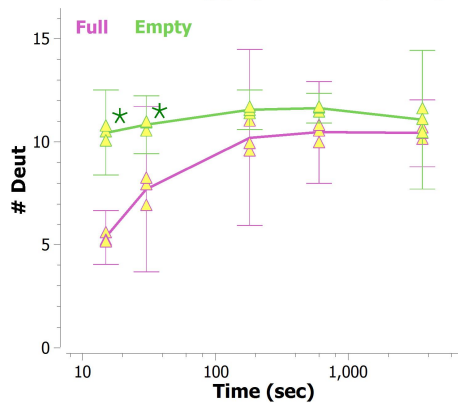

**AAV8\_VP1 74-96:  
EHDKAYDQQLQAGDNPYLRYNHA  
(#27)**

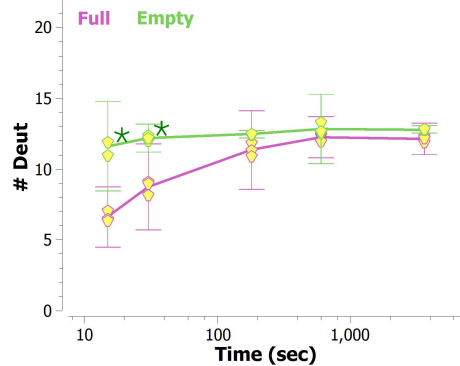

**AAV8\_VP1 74-99:**  
**EHDKAYDQQLQAGDNPYLRYNHADAE**  
**(#28)**

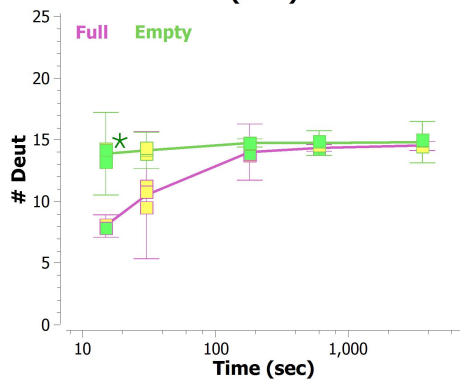

**AAV8\_VP1 74-100:**  
**HDKAYDQQLQAGDNPYLRYNHADAE**  
**(#29)**

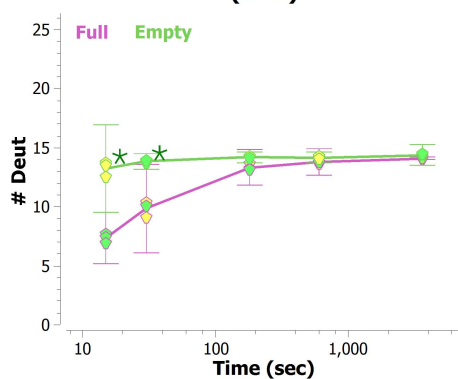

**AAV8\_VP1 79-83: YDQQL (#30)**

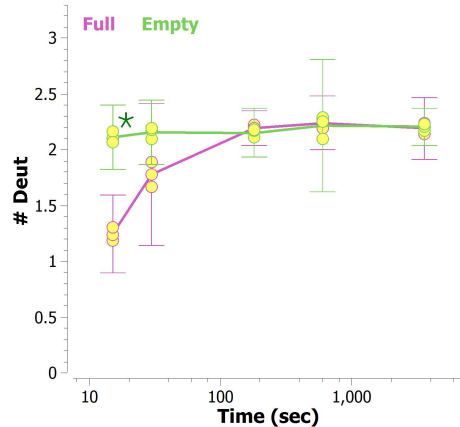

**AAV8\_VP1 79-96:  
YDQQLQAGDNPYLRYNHA (#31)**

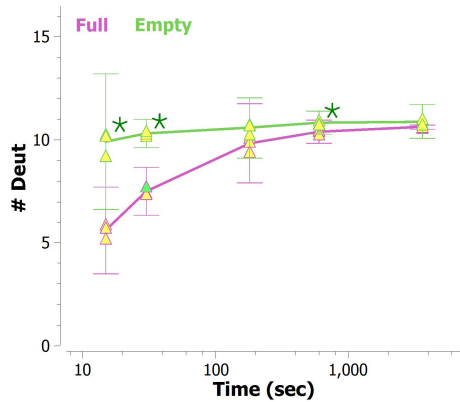

**AAV8\_VP1 79-99:  
YDQQLQAGDNPYLRYNHADAE  
(#32)**

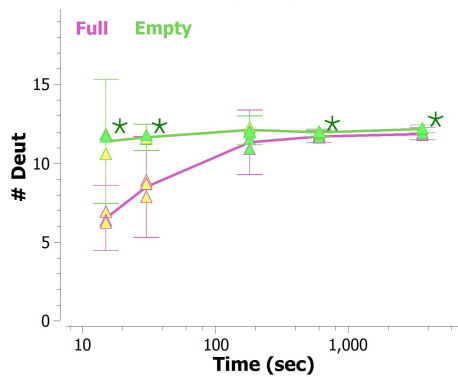

**AAV8\_VP1 79-100:**  
**YDQQLQAGDNPYLRYNHADAEF**  
**(#33)**

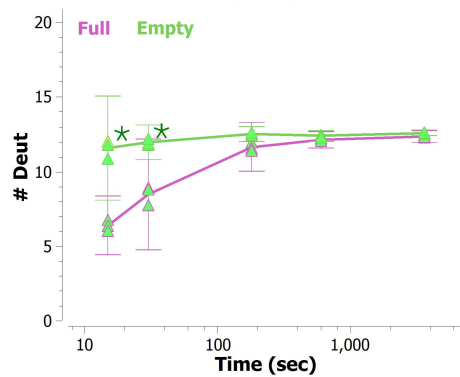

**AAV8\_VP1 84-91: QAGDNPYL**  
**(#34)**

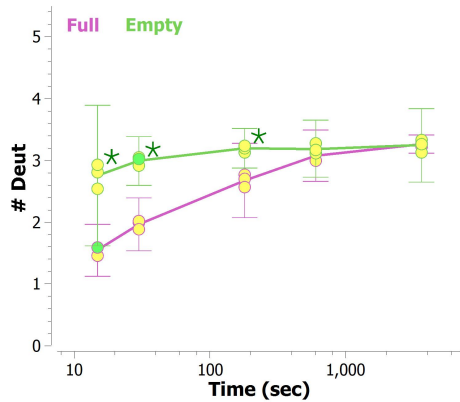

**AAV8\_VP1 84-96:  
QAGDNPYLRYNHA (#35)**

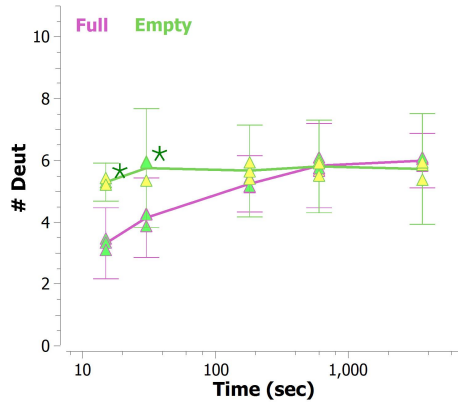

**AAV8\_VP1 84-99:  
QAGDNPYLRYNHADAE (#36)**

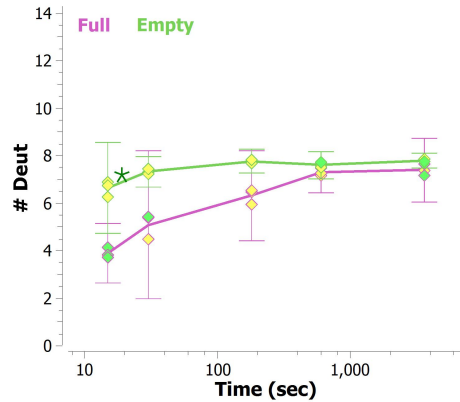

**AAV8\_VP1 84-100:  
QAGDNPYLRYNHADAEF (#37)**

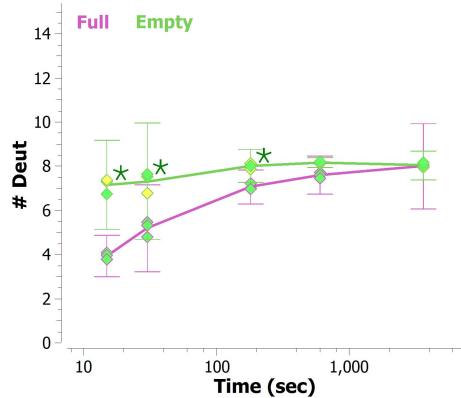

**AAV8\_VP1 89-100:  
PYLRYNHADAEF (#38)**

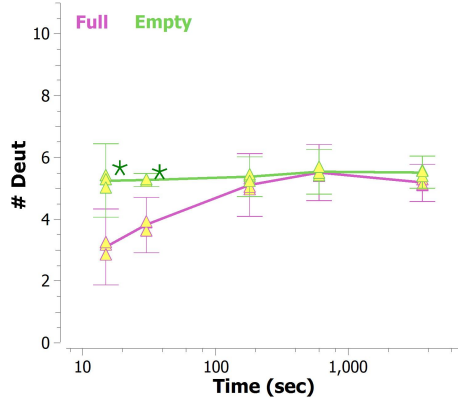

**AAV8\_VP1 92-99: RYNHADAE  
(#39)**

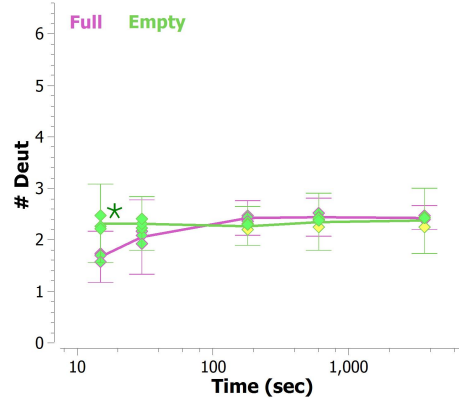

**AAV8\_VP1 92-100: RYNHADAEF  
(#40)**

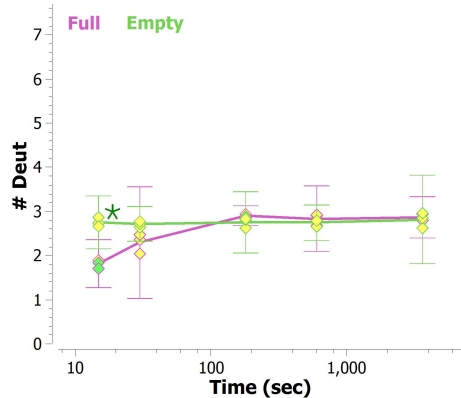

**AAV8\_VP1 100-106: FQERLQE  
(#41)**

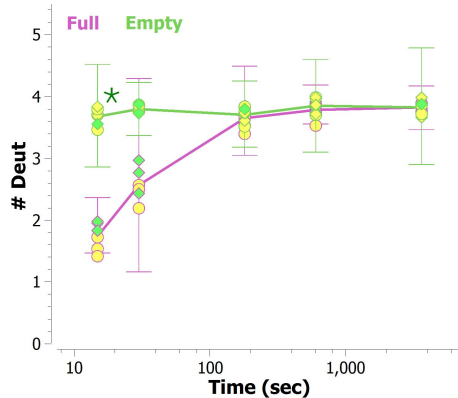

**AAV8\_VP1 100-107: FQERLQED  
(#42)**

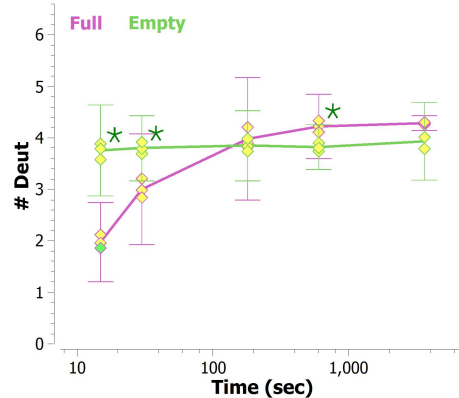

**AAV8\_VP1 100-119:  
FQERLQEDTSFGGNLGRAVF (#43)**

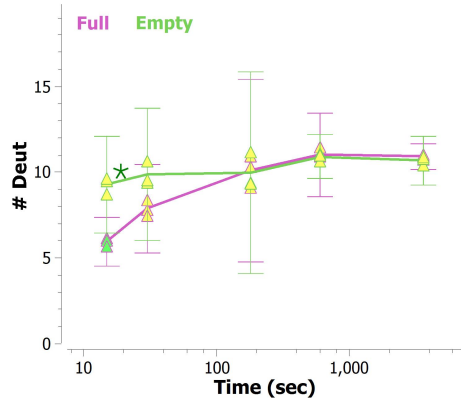

**AAV8\_VP1 101-106: QERLQE  
(#44)**

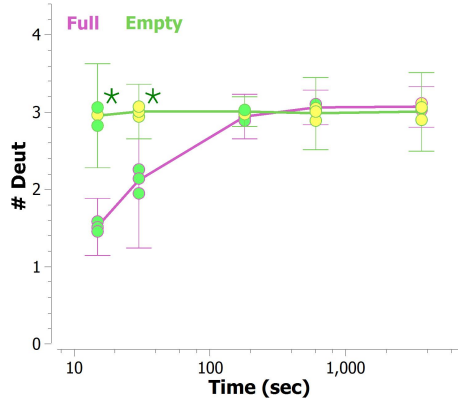

**AAV8\_VP1 101-107: QERLQED  
(#45)**

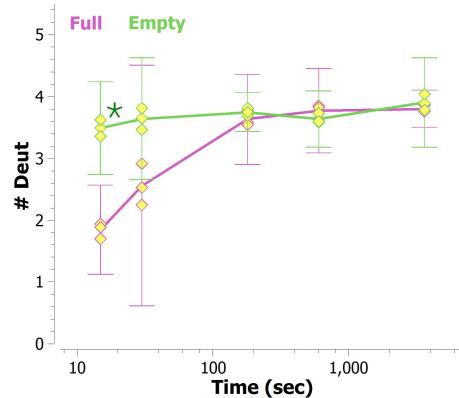

**AAV8\_VP1 101-110: QERLQEDTSF  
(#46)**

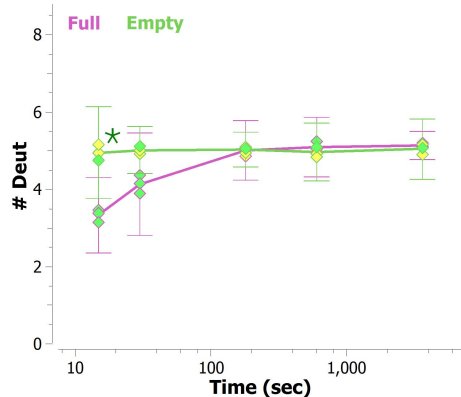

**AAV8\_VP1 101-119:  
QERLQEDTSFGGNLGRAVF (#47)**

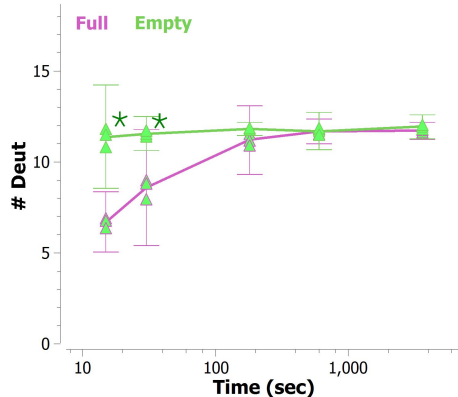

**AAV8\_VP1 101-131:  
RLQEDTSFGGNLGRAVFQAKKRVLEPI  
(#48)**

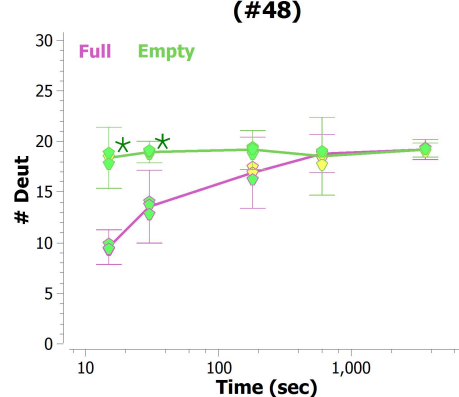

AAV8\_VP1 105-110: QEDTSF (#49)

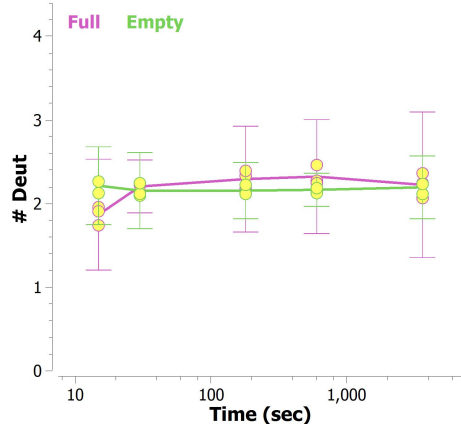

AAV8\_VP1 105-119: QEDTSFGGNLGRAVF (#50)

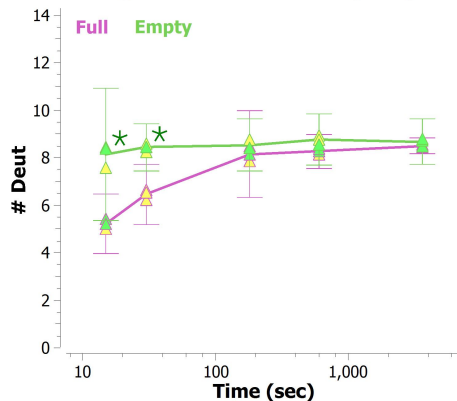

AAV8\_VP1 105-131: QEDTSFGGNLGRAVFQAKKRVLEPLGL (#51)

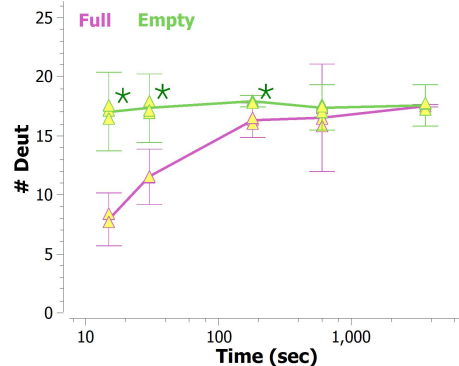

AAV8\_VP1 107-119: DTSFGGNLGRAVF (#52)

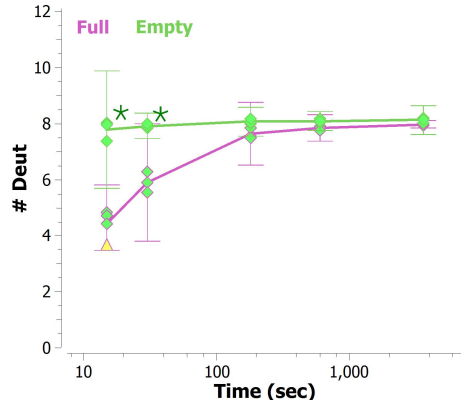

AAV8\_VP1 107-131: DTSFGGNLGRAVFQAKKRVLEPLGL (#53)

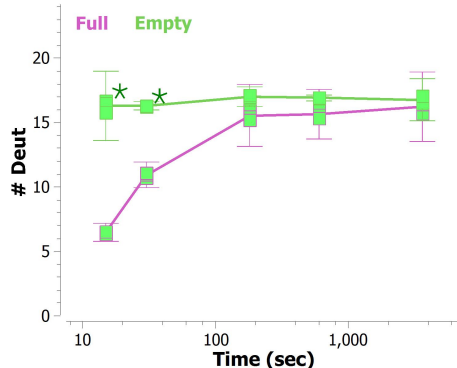

AAV8\_VP1 111-119: GGNLGRAVF (#54)

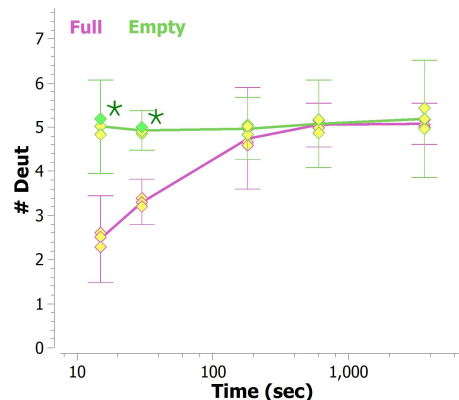

AAV8\_VP1 120-131: QAKKRVLEPLGL (#55)

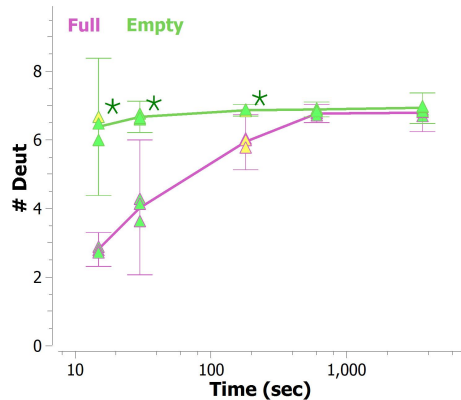

AAV8\_VP1 205-229: AAGGGAPMADNNEGADGVGSSSGNW (#56)

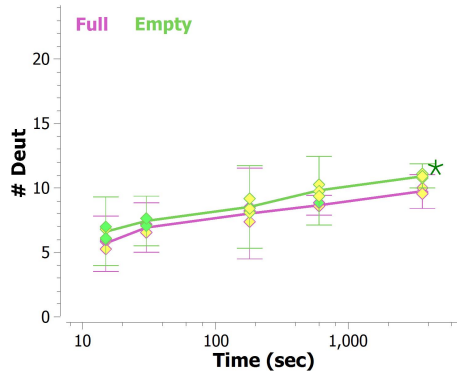

AAV8\_VP1 205-238: APMADNNEGADGVGSSSGNWHCDS1 (#57)

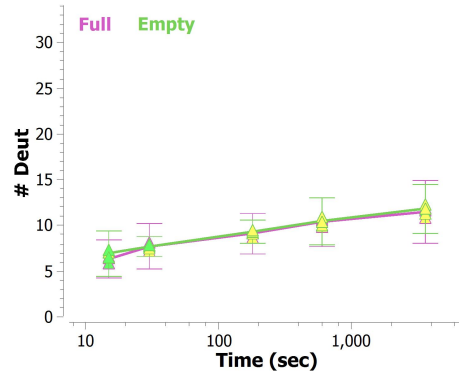

AAV8\_VP1 215-229: NNEGADGVGSSSGNW (#58)

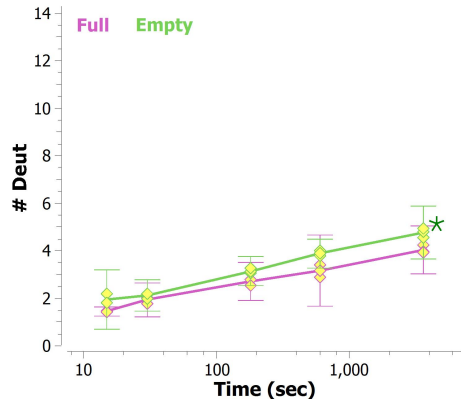

AAV8\_VP1 229-238: WHCDSWLGD (#59)

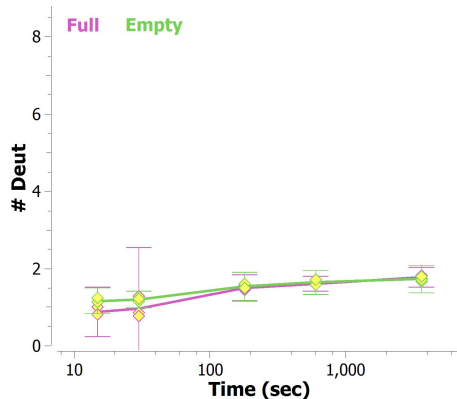

AAV8\_VP1 230-235: HCDSTW (#60)

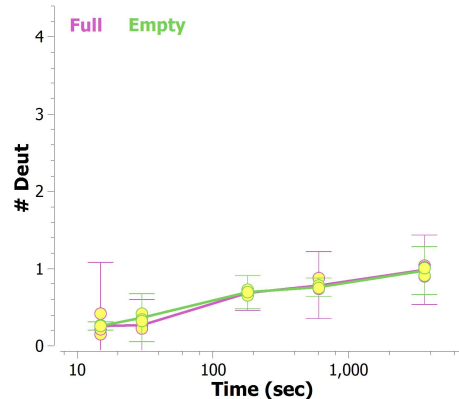

**AAV8\_VP1 230-236: HCDSTWL  
(#61)**

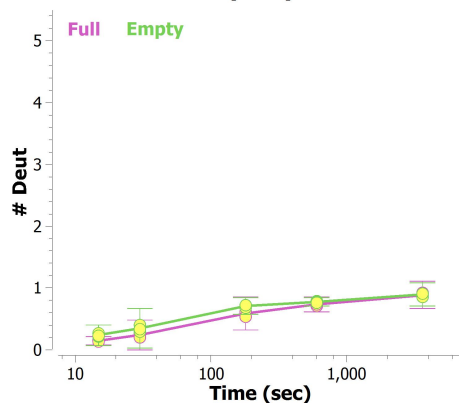

**AAV8\_VP1 230-238: HCDSTWLGD**  
**(#62)**

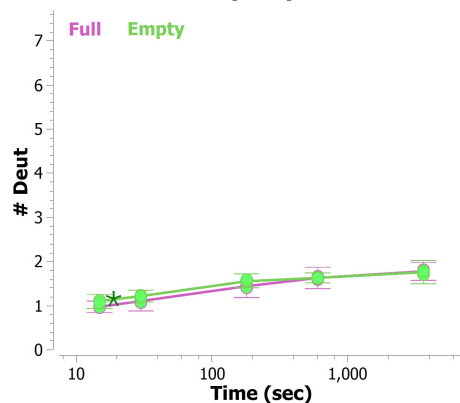

**AAV8\_VP1 230-240:  
HCDSTWLGDRV (#63)**

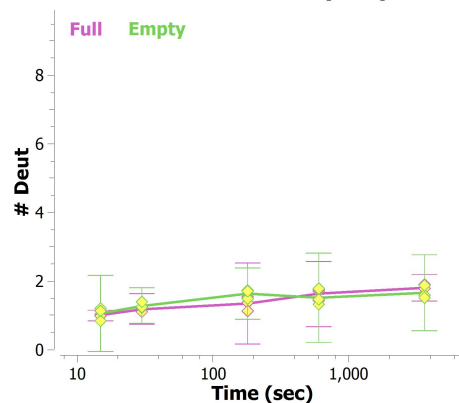

**AAV8\_VP1 230-242:  
HCDSTWLGDRVIT (#64)**

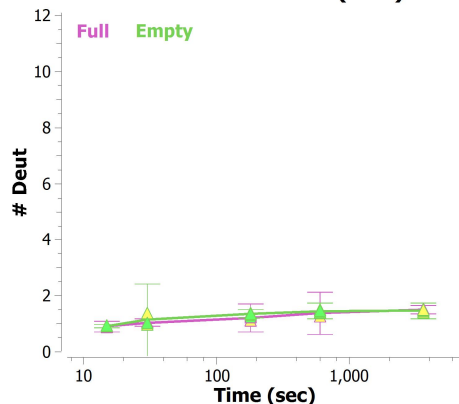

**AAV8\_VP1 230-243:  
HCDSTWLGDRVITT (#65)**

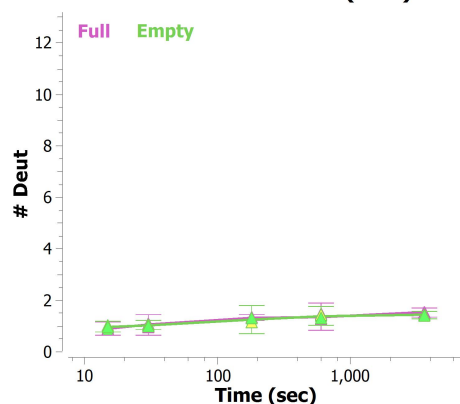

**AAV8\_VP1 230-245:  
HCDSTWLGDRVITTST (#66)**

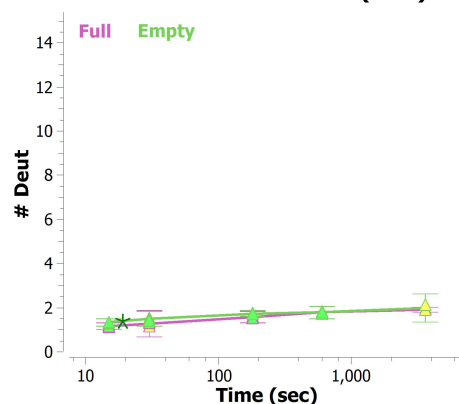

**AAV8\_VP1 230-247:  
HCDSTWLGDRVITTSTRT (#67)**

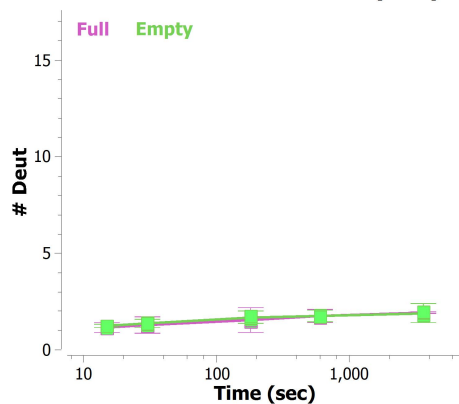

**AAV8\_VP1 230-257:  
CDSTWLGDRVITTSTRTWALPTYNNH  
(#68)**

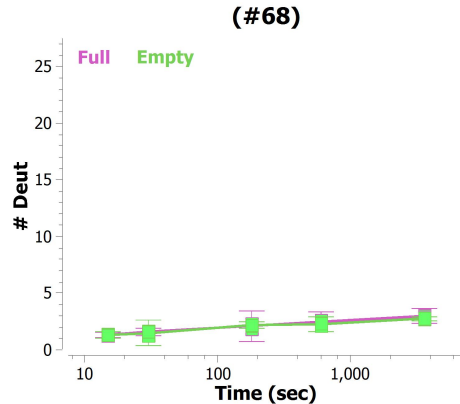

**AAV8\_VP1 232-243:  
DSTWLGDRVITT (#69)**

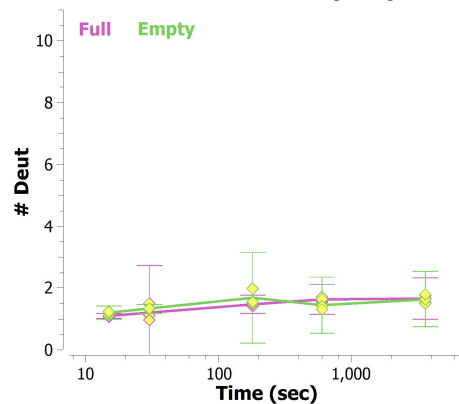

**AAV8\_VP1 232-247:  
DSTWLGDRVITTSTRT (#70)**

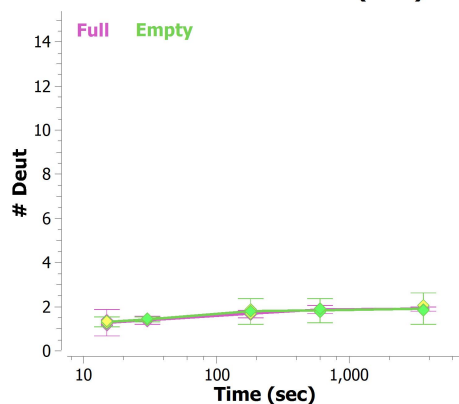

**AAV8\_VP1 232-257:  
DSTWLGDRVITTSTRTWALPTYNNHL  
(#71)**

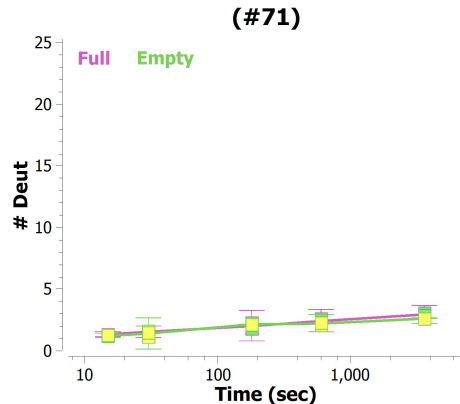

**AAV8\_VP1 234-238: TWLGD**  
**(#72)**

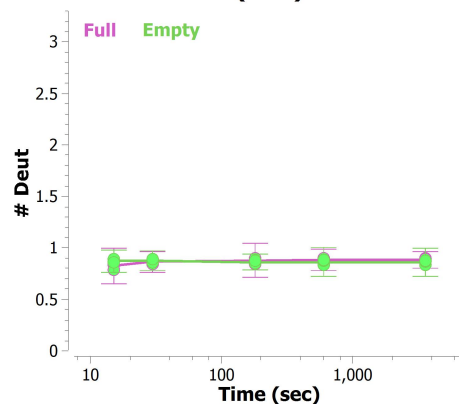

**AAV8\_VP1 234-247:  
TWLGDRVITTSTRT (#73)**

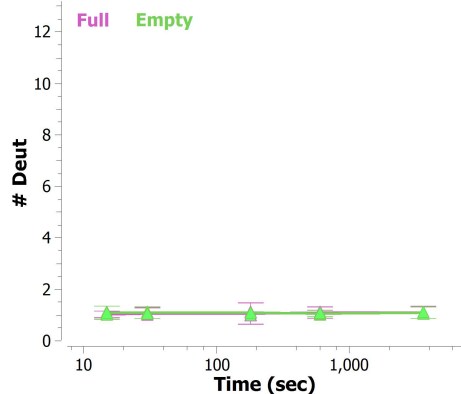

**AAV8\_VP1 235-238: WLGD (#74)**

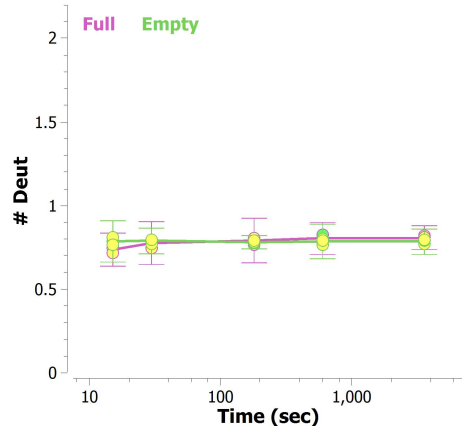

**AAV8\_VP1 235-247:  
WLGDRVITTSTRT (#75)**

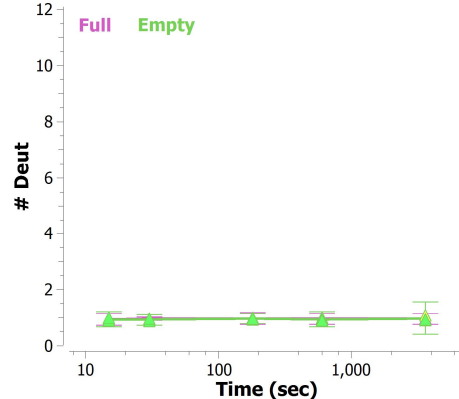

**AAV8\_VP1 236-247:  
LGDRVITTSTRT (#76)**

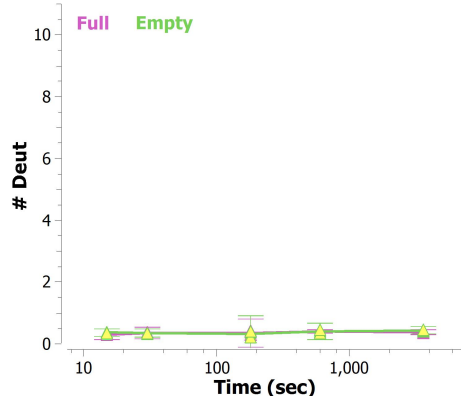

**AAV8\_VP1 236-257:  
LGDRVITTSTRTWALPTYNNHL  
(#77)**

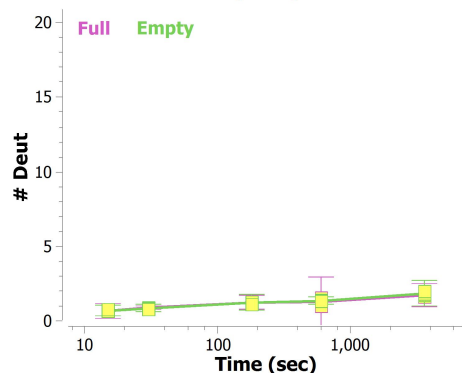

**AAV8\_VP1 237-247: GDRVITTSTRT  
(#78)**

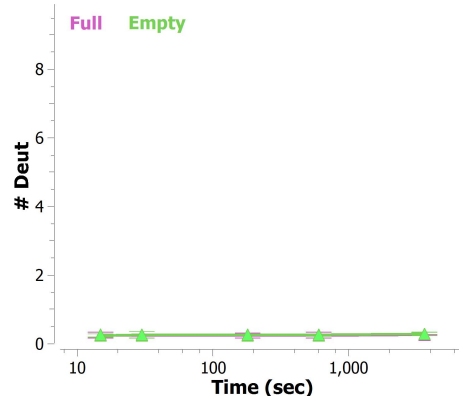

**AAV8\_VP1 237-257:  
GDRVITTSTRTWALPTYNNHL  
(#79)**

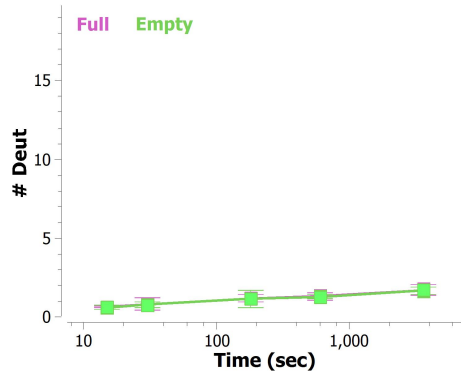

**AAV8\_VP1 238-247: DRVITTSTRT  
(#80)**

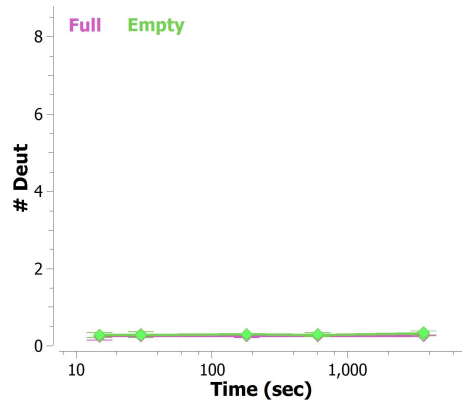

**AAV8\_VP1 239-243: RVITT (#81)**

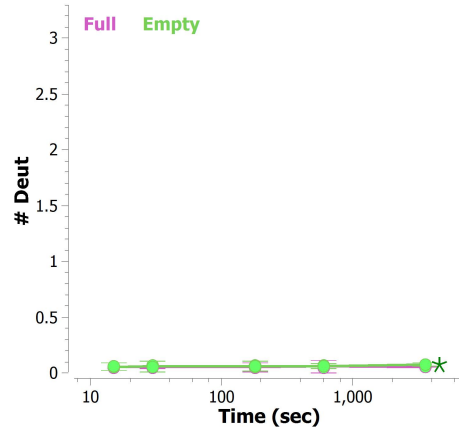

**AAV8\_VP1 239-245: RVITTST  
(#82)**

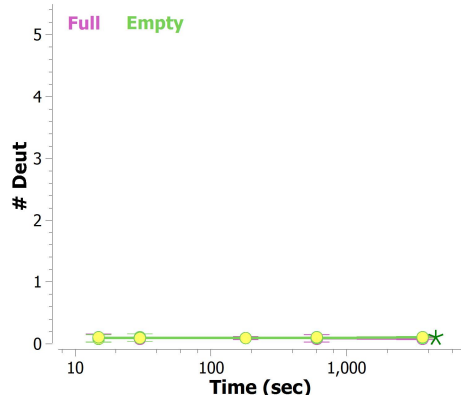

**AAV8\_VP1 239-247: RVITTSTRT  
(#83)**

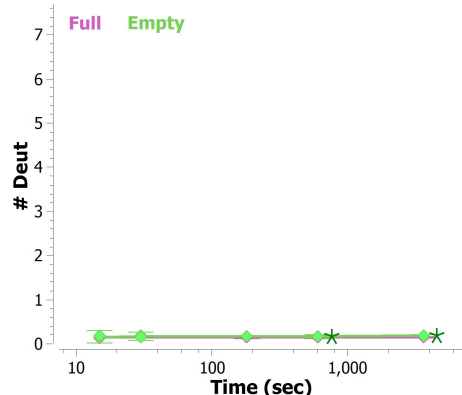

**AAV8\_VP1 239-250:  
RVITTSTRTWAL (#84)**

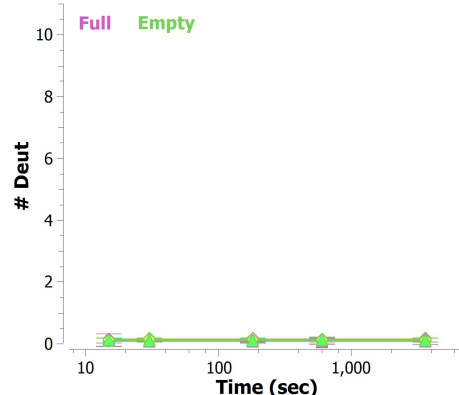

**AAV8\_VP1 239-257:  
RVITTSTRTWALPTYNNHL (#85)**

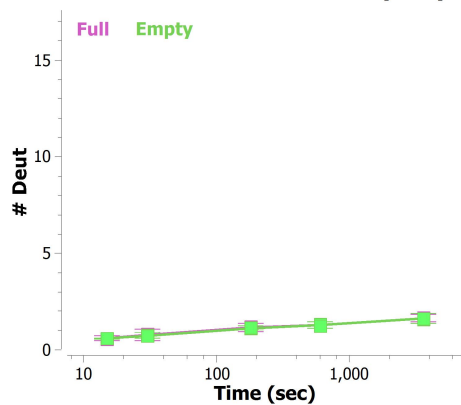

**AAV8\_VP1 241-257:  
ITTSTRTWALPTYNNHL (#86)**

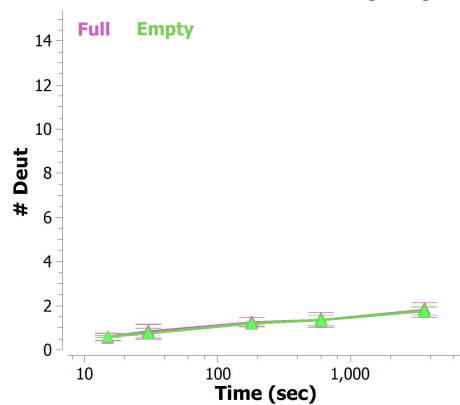

**AAV8\_VP1 243-247: TSTRT (#87)**

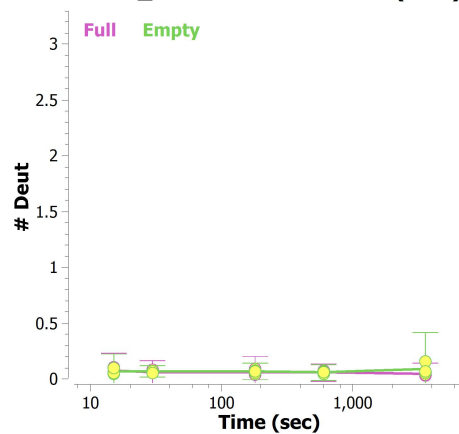

**AAV8\_VP1 243-257:  
TSTRTWALPTYNNHL (#88)**

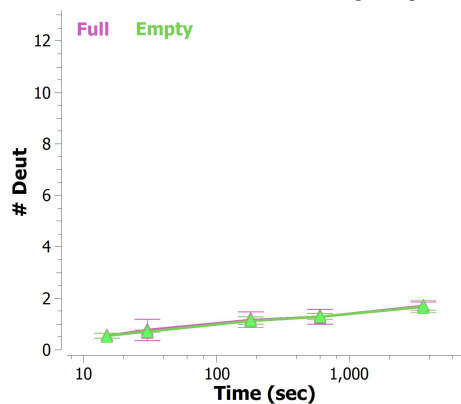

**AAV8\_VP1 244-257:  
STRTWALPTYNNHL (#89)**

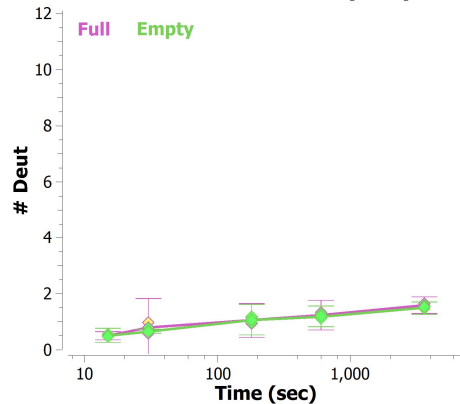

**AAV8\_VP1 245-257:  
TRTWALPTYNNHL (#90)**

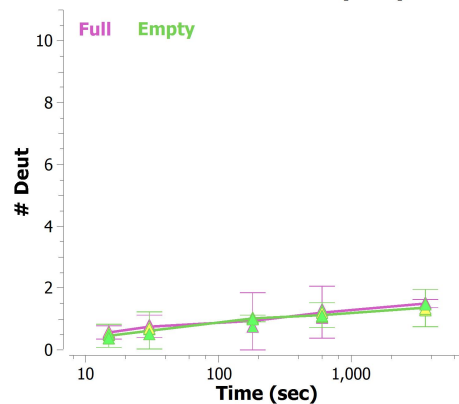

**AAV8\_VP1 246-257:  
RTWALPTYNNHL (#91)**

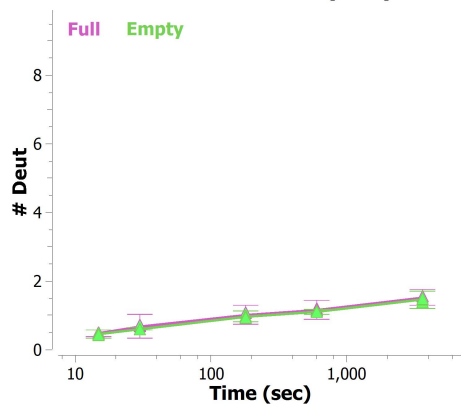

**AAV8\_VP1 248-257: WALPTYNNHL  
(#92)**

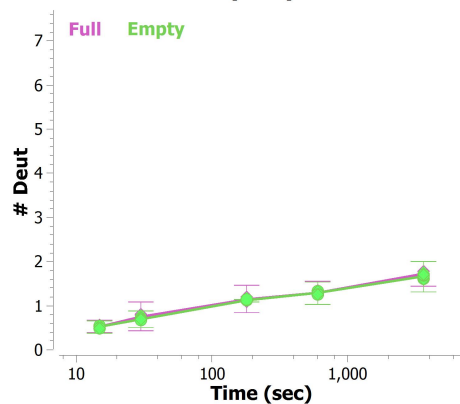

**AAV8\_VP1 250-257: LPTYNNHL  
(#93)**

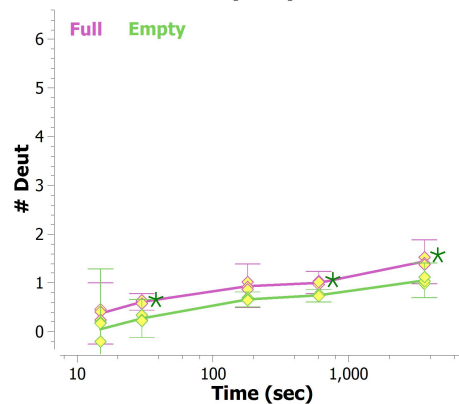

**AAV8\_VP1 251-257: PTYNNHL  
(#94)**

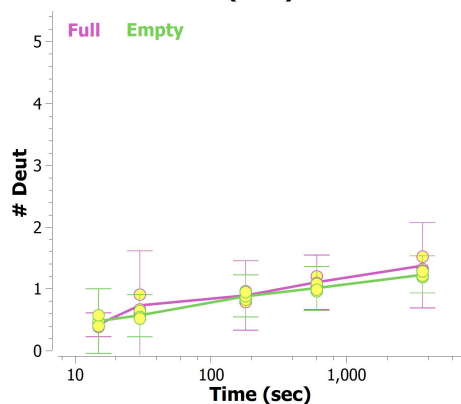

**AAV8\_VP1 258-264: YKQISNG  
(#95)**

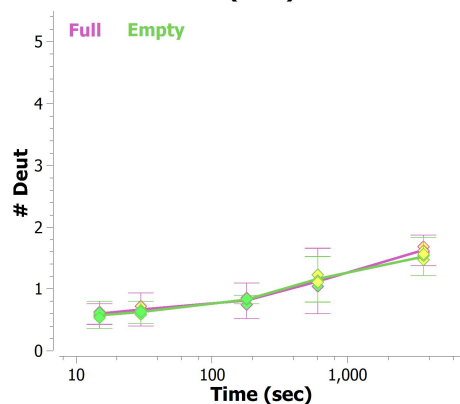

**AAV8\_VP1 258-265: YKQISNGT  
(#96)**

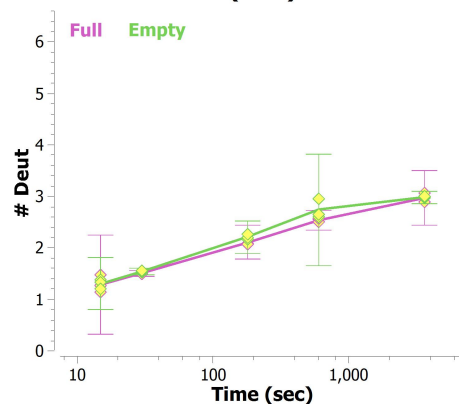



**AAV8\_VP1 258-266: YKQISNGTS (#97)**

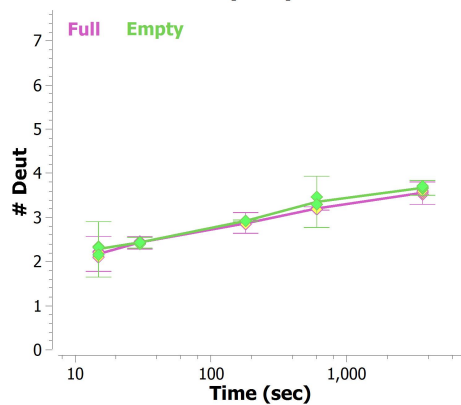

**AAV8\_VP1 258-272: YKQISNGTSGGATND (#98)**

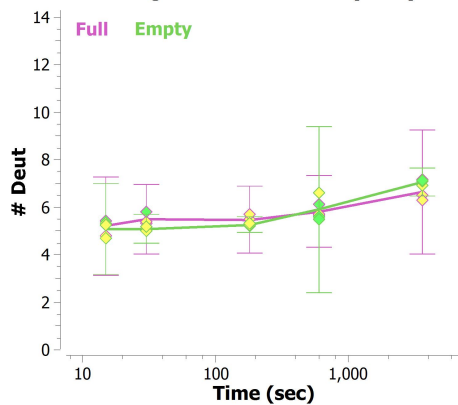

**AAV8\_VP1 258-274: YKQISNGTSGGATNDNT (#99)**

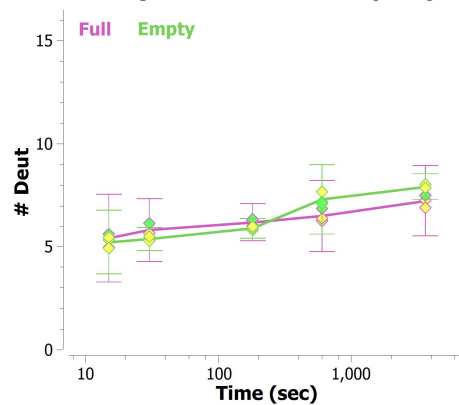

**AAV8\_VP1 258-275: YKQISNGTSGGATNDNTY (#100)**

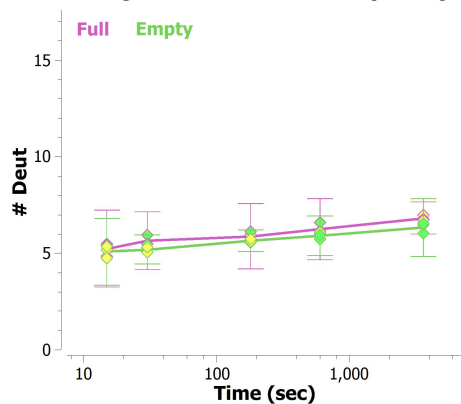

**AAV8\_VP1 273-284: NTYFGYSTPWGY (#101)**

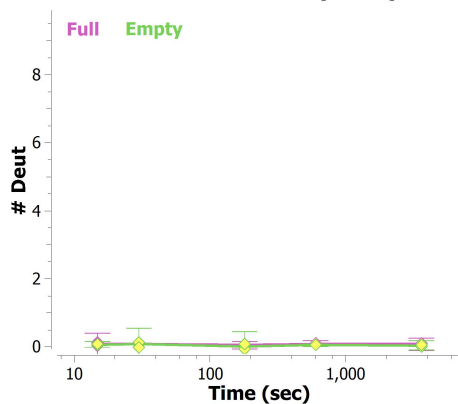

**AAV8\_VP1 277-284: GYSTPWGY (#102)**

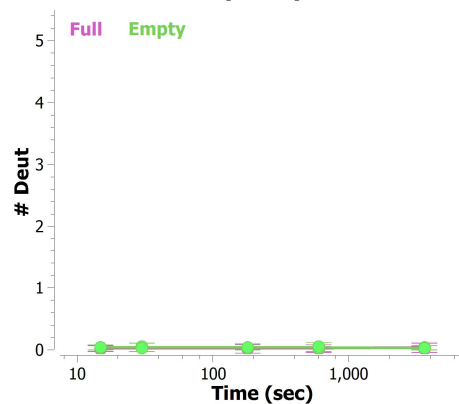

**AAV8\_VP1 277-285: GYSTPWGYF (#103)**

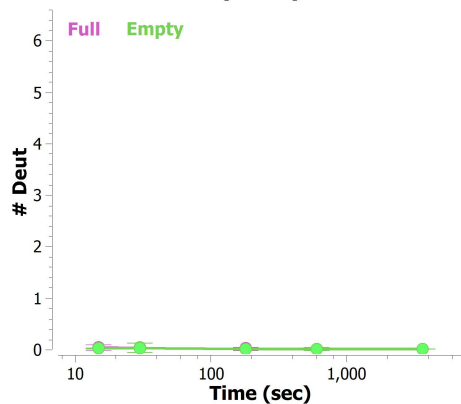

**AAV8\_VP1 278-284: YSTPWGY (#104)**

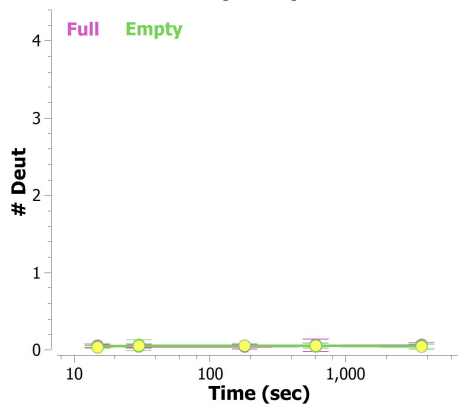

**AAV8\_VP1 278-285: YSTPWGYF (#105)**

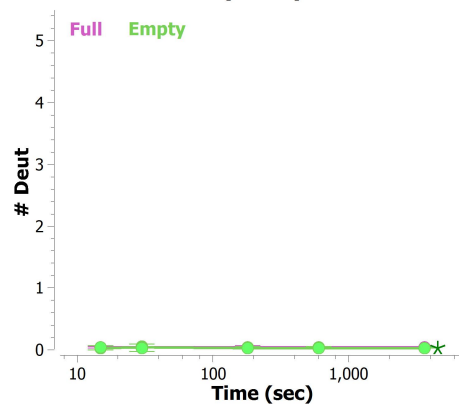

**AAV8\_VP1 278-286: YSTPWGYFD (#106)**

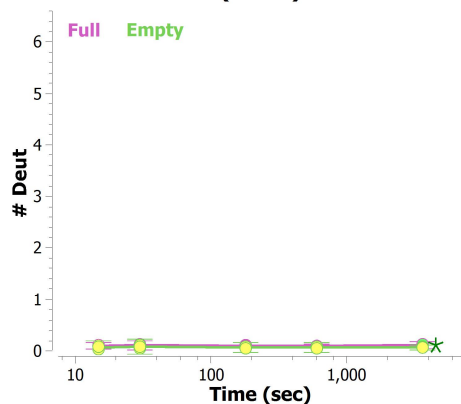

**AAV8\_VP1 285-298: FDFNRFHCHFSRPD (#107)**

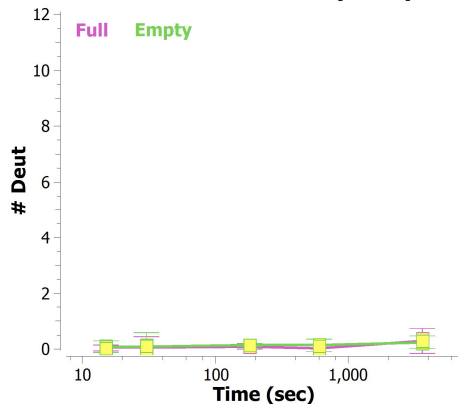

**AAV8\_VP1 286-294: DFNRFHCHF (#108)**

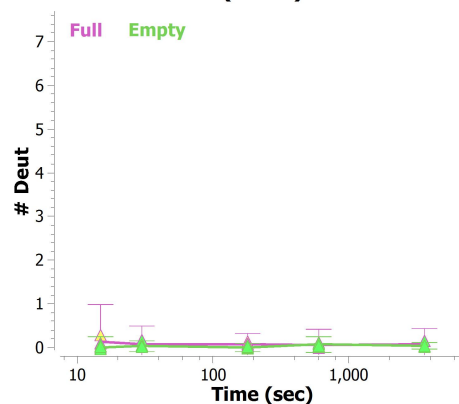

**AAV8\_VP1 286-302:  
DFNRFHCHFSPRDWQRL (#109)**

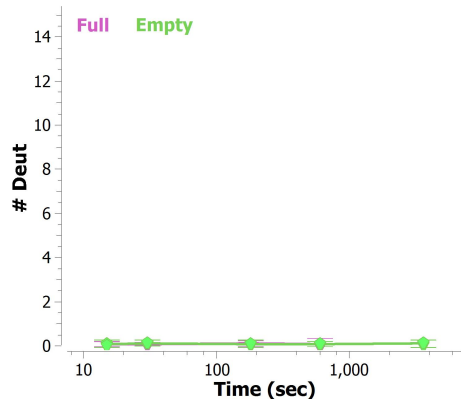

**AAV8\_VP1 288-302:  
NRFHCHFSPRDWQRL (#110)**

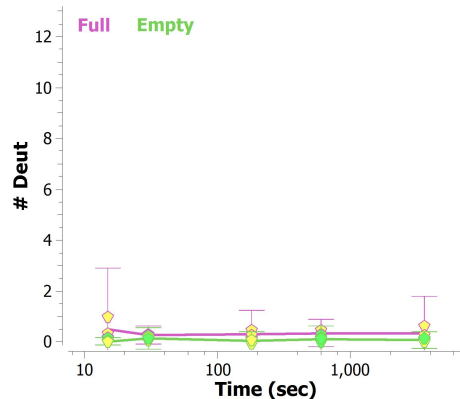

**AAV8\_VP1 288-306:  
NRFHCHFSPRDWQRLINNN (#111)**

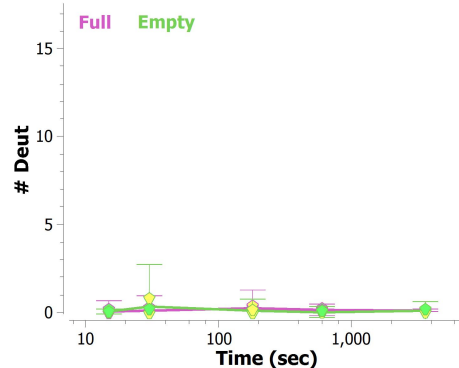

**AAV8\_VP1 291-298: HCHFSPRD  
(#112)**

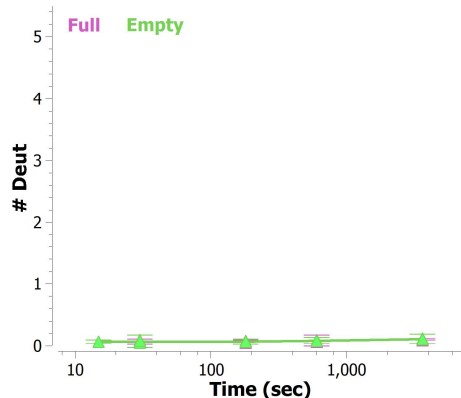

**AAV8\_VP1 291-302:  
HCHFSPRDWQRL (#113)**

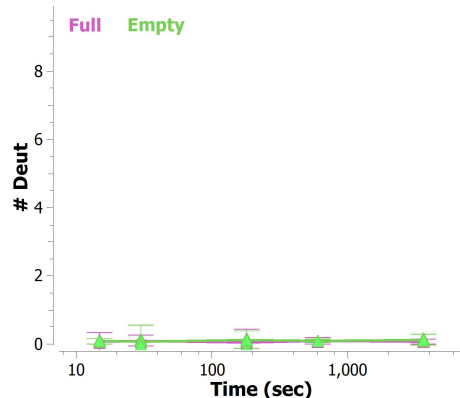

**AAV8\_VP1 291-306:  
HCHFSPRDWQRLINNN (#114)**

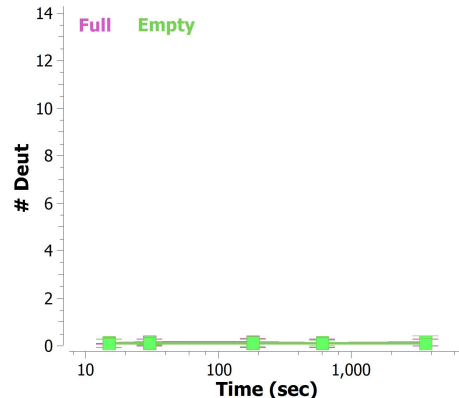

**AAV8\_VP1 291-307:  
HCHFSPRDWQRLINNNW (#115)**

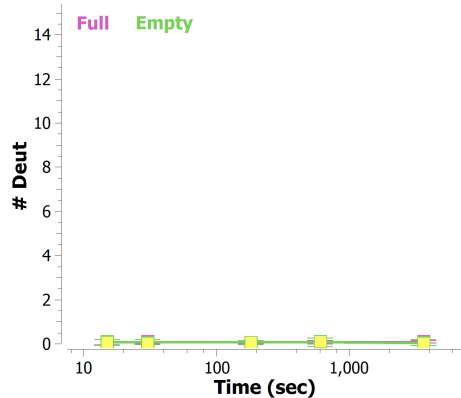

**AAV8\_VP1 299-306: WQRLINNN  
(#116)**

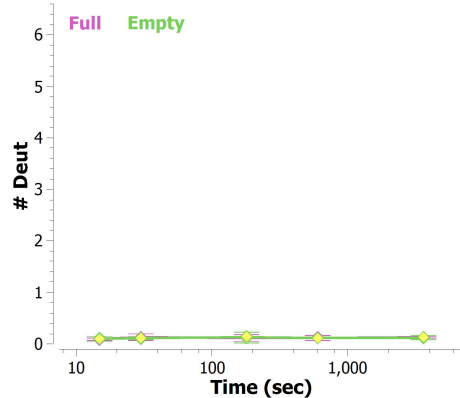

**AAV8\_VP1 299-307: WQRLINNNW  
(#117)**

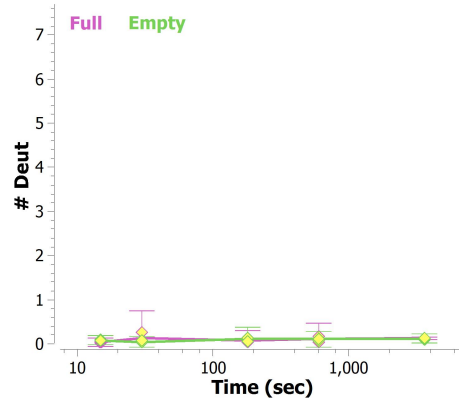

**AAV8\_VP1 299-316:  
WQRLINNNWGFPRKRLSF (#118)**

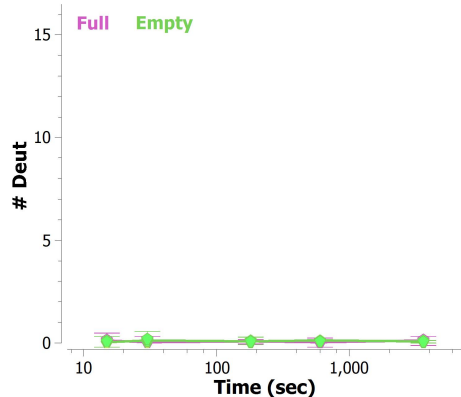

**AAV8\_VP1 299-318:  
WQRLINNNWGFPRKRLSKL (#119)**

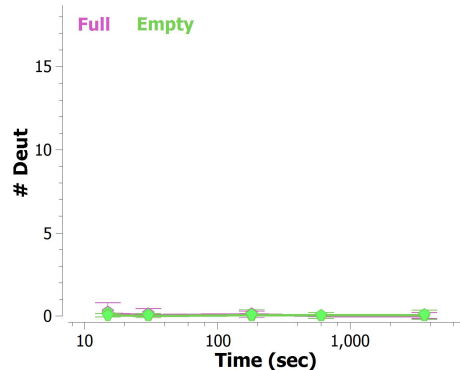

**AAV8\_VP1 300-316:  
QRLINNNWGFPRKRLSF (#120)**

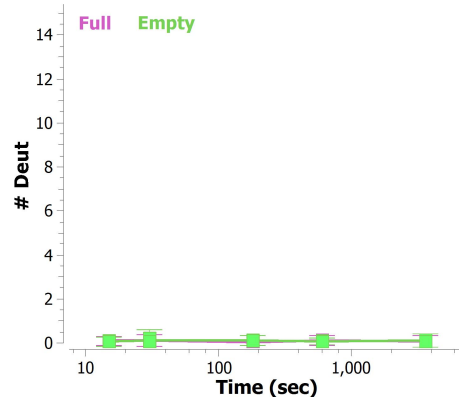

**AAV8\_VP1 303-316:  
INNNWGFRPKRLSF (#121)**

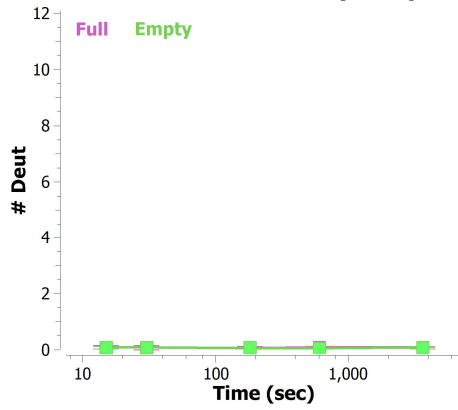

**AAV8\_VP1 303-318:  
INNNWGFRPKRLSFKL (#122)**

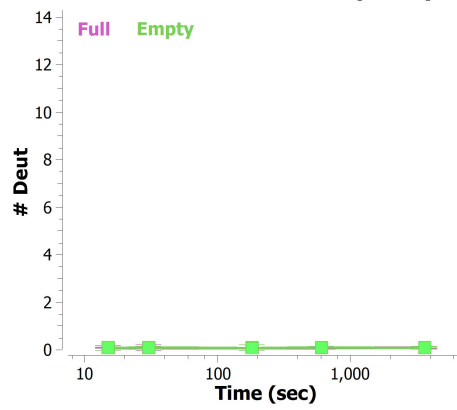

**AAV8\_VP1 307-318:  
WGFRPKRLSFKL (#123)**

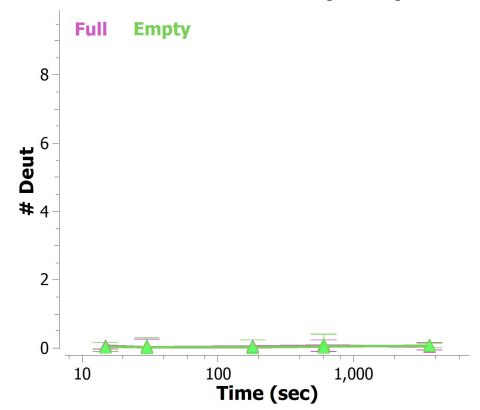

**AAV8\_VP1 317-320: KLFN (#124)**

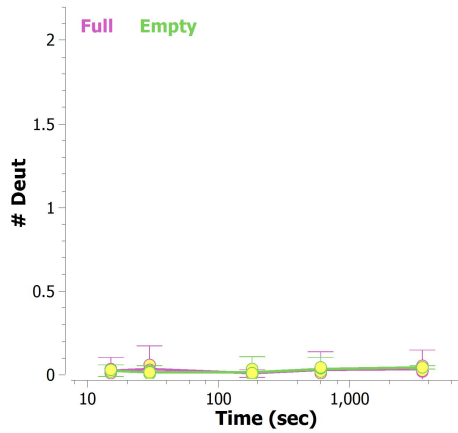

**AAV8\_VP1 317-322: KLFNIQ  
(#125)**

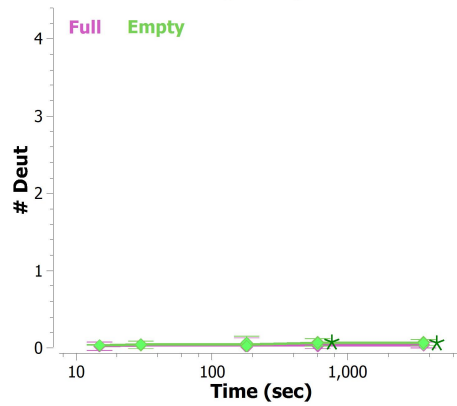

**AAV8\_VP1 317-323: KLFNIQV  
(#126)**

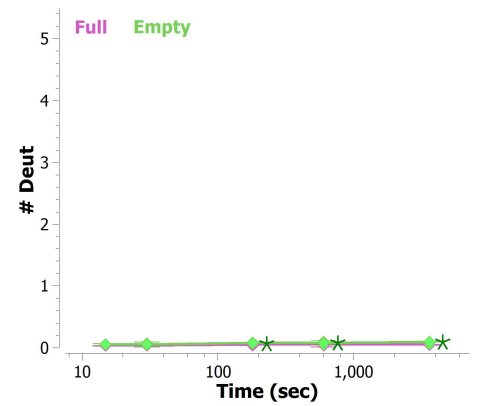

**AAV8\_VP1 317-325: KLFNIQVKE  
(#127)**

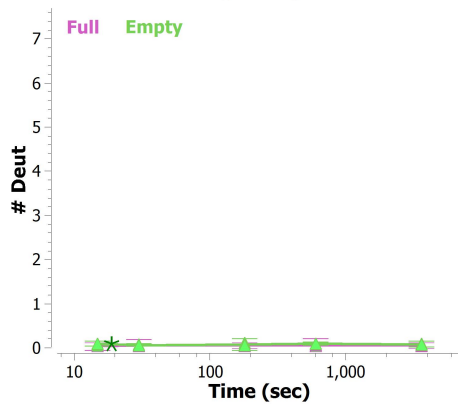

**AAV8\_VP1 317-338:  
KLFNIQVKEVTQNEGTKTIANN  
(#128)**

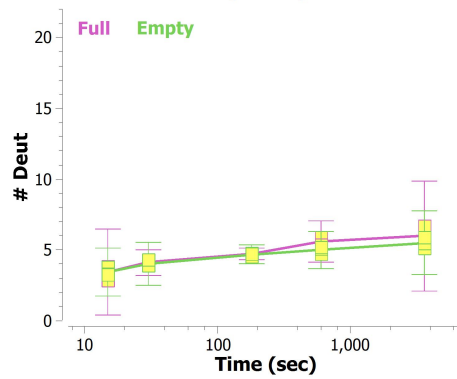

**AAV8\_VP1 317-339:  
KLFNIQVKEVTQNEGTKTIANNL  
(#129)**

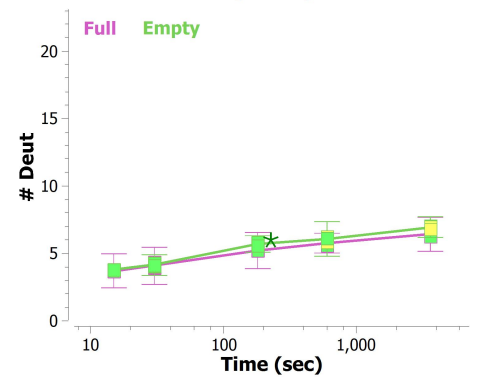

**AAV8\_VP1 317-341:  
KLFNIQVKEVTQNEGTKTIANNLTS  
(#130)**

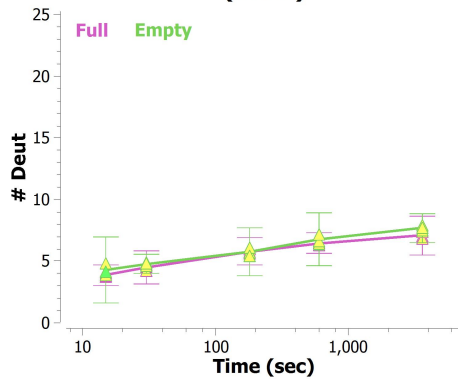

**AAV8\_VP1 317-342:  
KLFNIQVKEVTQNEGTKTIANNLTST  
(#131)**

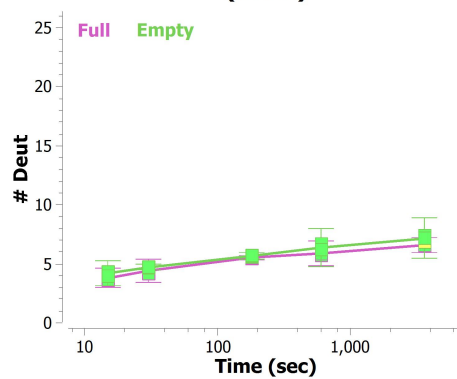

**AAV8\_VP1 317-344:  
KLFNIQVKEVTQNEGTKTIANNLTSTIQ  
(#132)**

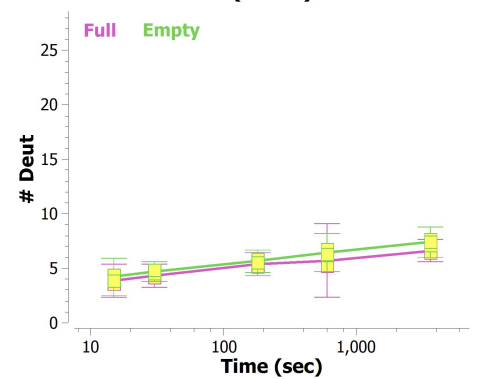

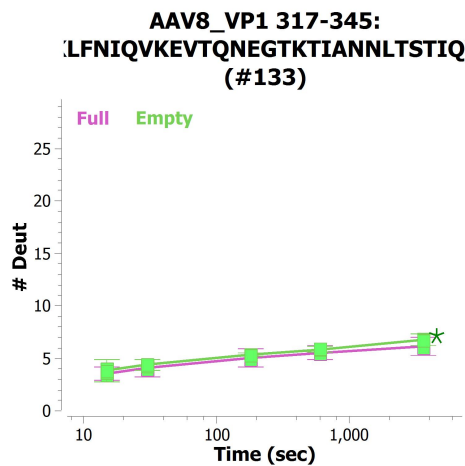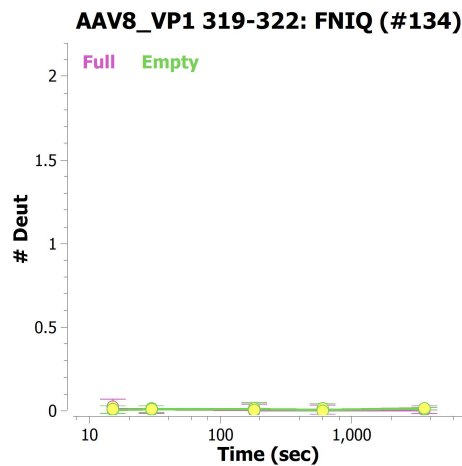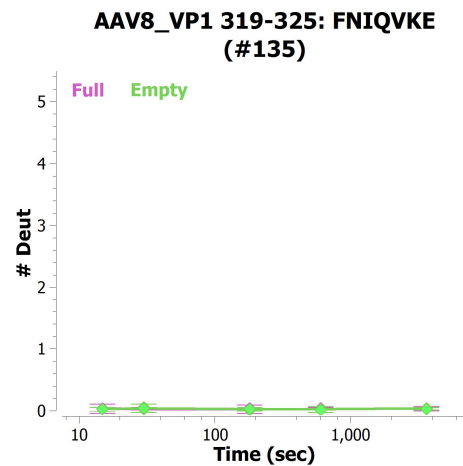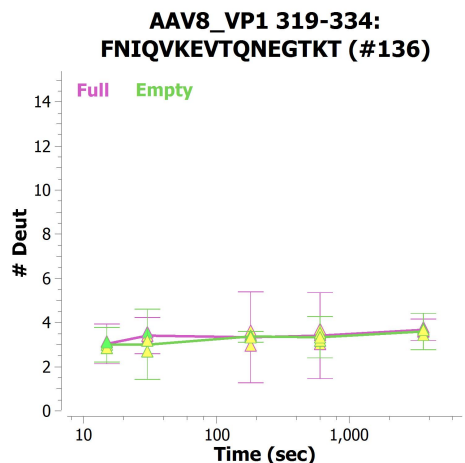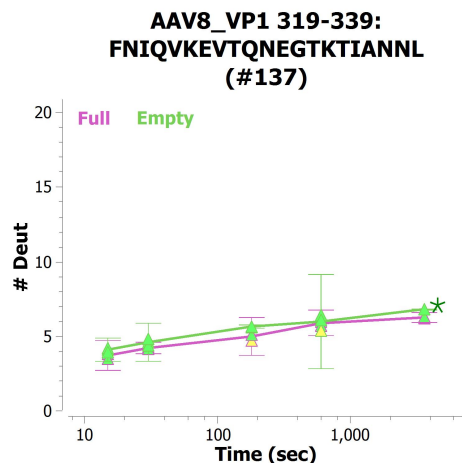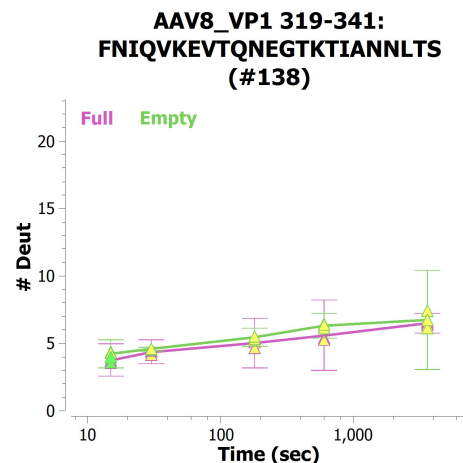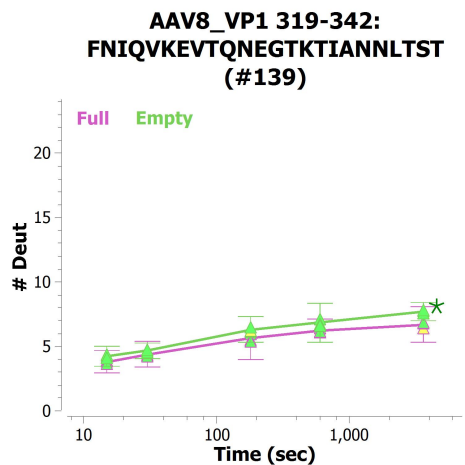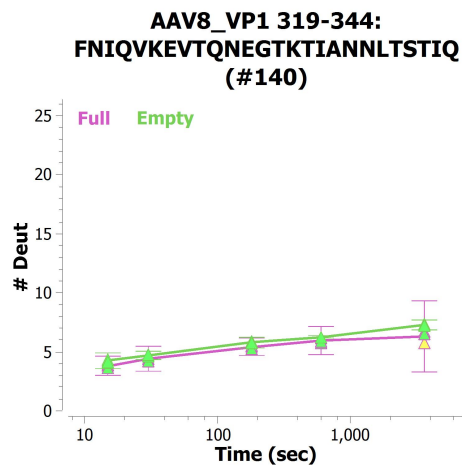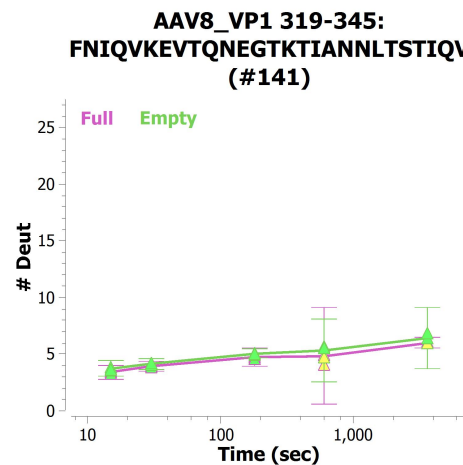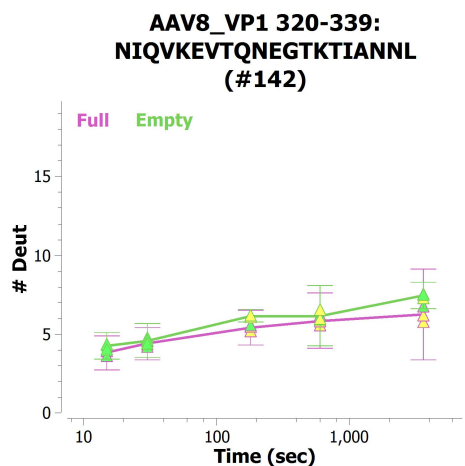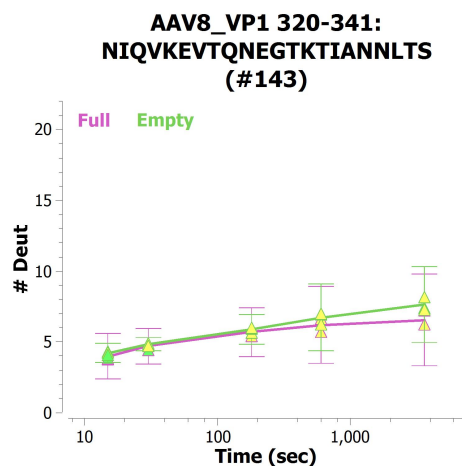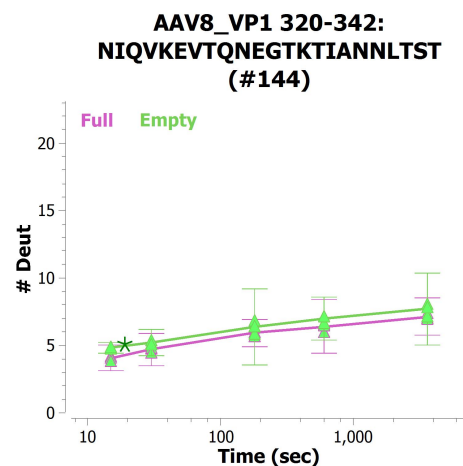

**AAV8\_VP1 320-345:**  
**NIQVKEVTQNEGKTIANNLTSTIQV**  
**(#145)**

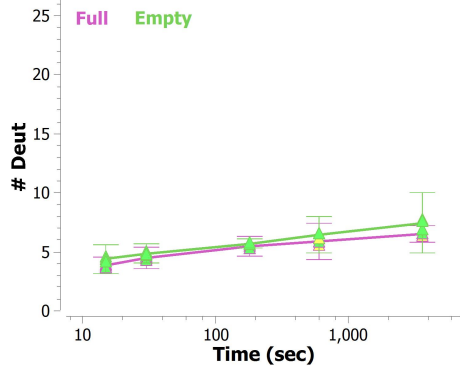

**AAV8\_VP1 320-346:**  
**NIQVKEVTQNEGKTIANNLTSTIQVF**  
**(#146)**

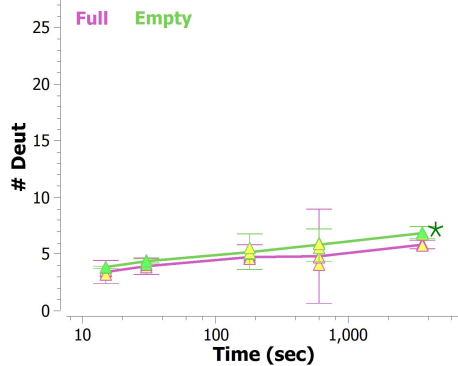

**AAV8\_VP1 320-350:**  
**QVKEVTQNEGKTIANNLTSTIQVFTD**  
**(#147)**

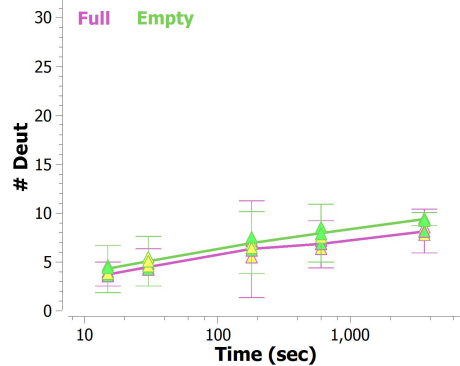

**AAV8\_VP1 321-342:  
IQVKEVTQNEGKTIANNLTST  
(#148)**

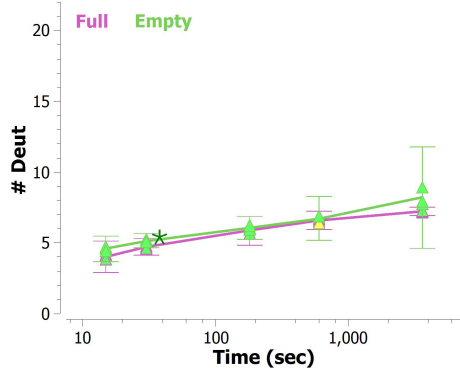

**AAV8\_VP1 321-345:  
IQVKEVTQNEGKTIANNLTSTIQV  
(#149)**

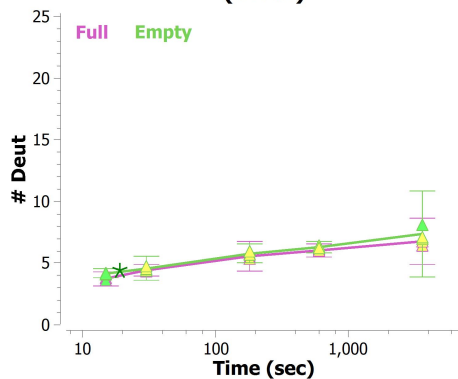

**AAV8\_VP1 323-339:  
VKEVTQNEGTKTIANNL (#150)**

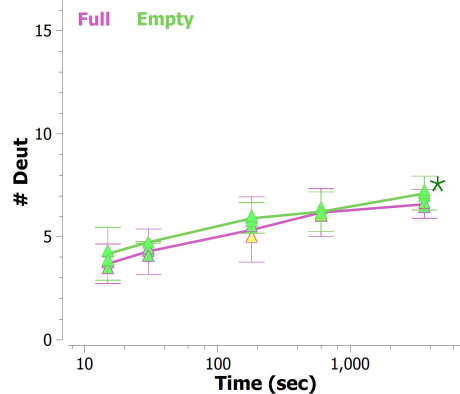

**AAV8\_VP1 323-342:  
VKEVTQNEGKTIANNLTST (#151)**

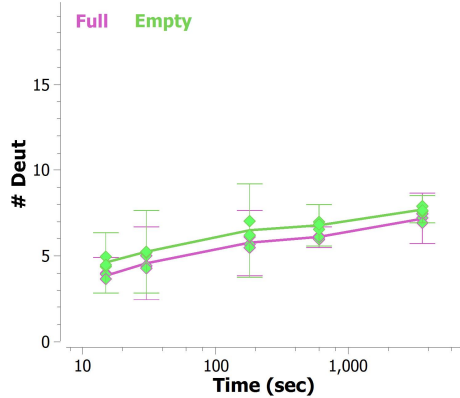

**AAV8\_VP1 323-344:  
VKEVTQNEGTKTIANNLTSTIQ  
(#152)**

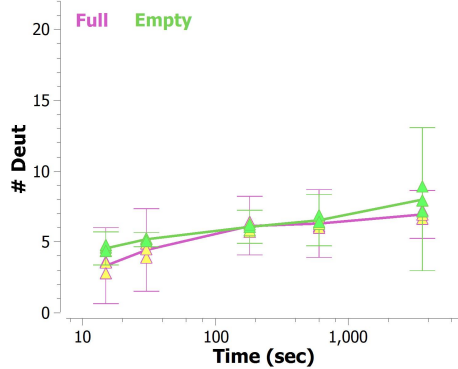

**AAV8\_VP1 323-345:  
VKEVTQNEGKTIANNLTSTIQV  
(#153)**

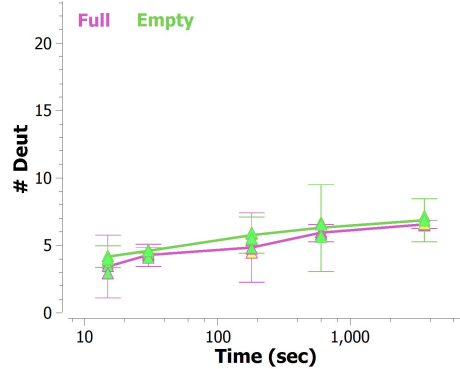

**AAV8\_VP1 323-346:  
VKEVTQNEGTKTIANNLTSTIQVF  
(#154)**

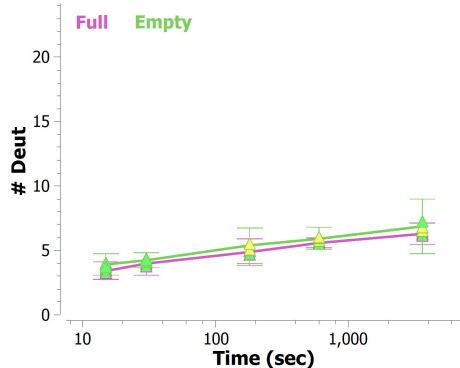

**AAV8\_VP1 323-347:  
VKEVTQNEGTKTIANNLTSTIQVFT  
(#155)**

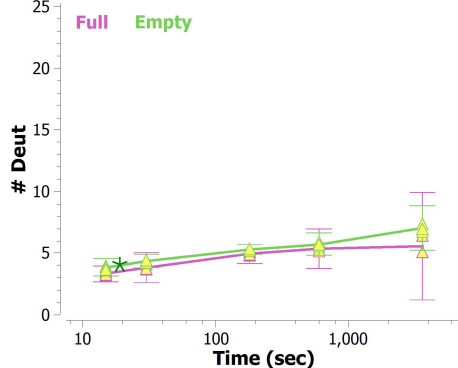

**AAV8\_VP1 323-350:**  
**/KEVTQNEGKTIANNLTSTIQVFTDSE**  
**(#156)**

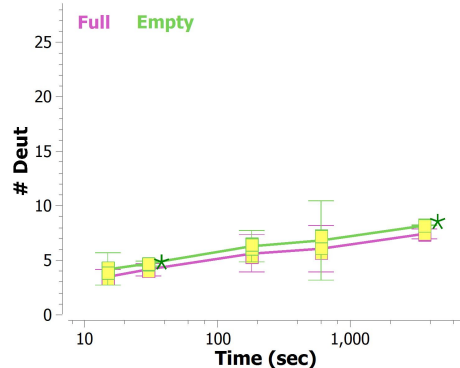

**AAV8\_VP1 324-339:  
KEVTQNEGKTIANNL (#157)**

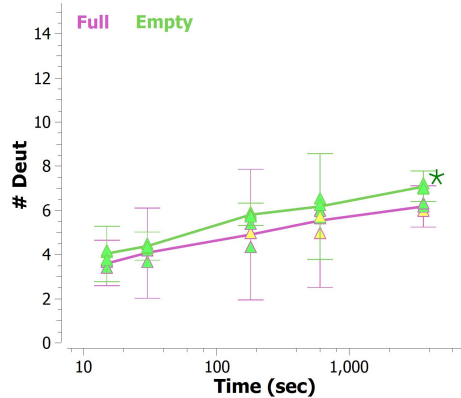

**AAV8\_VP1 324-342:  
KEVTQNEGKTIANNLST (#158)**

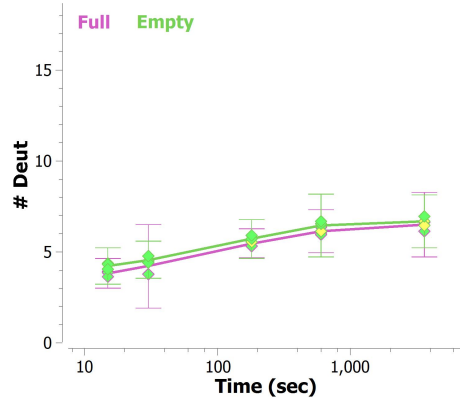

**AAV8\_VP1 324-345:  
KEVTQNEGKTIANNLSTSIQV  
(#159)**

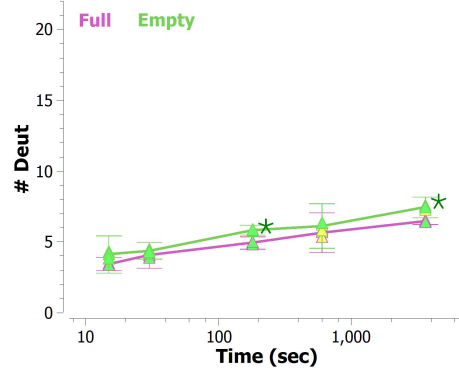

**AAV8\_VP1 324-346:  
KEVTQNEGKTIANNLSTSIQVF  
(#160)**

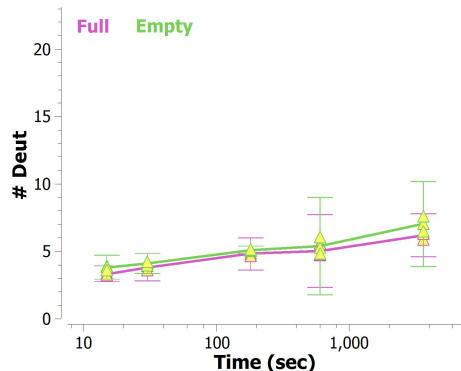

**AAV8\_VP1 326-342:  
VTQNEGKTIANNLST (#161)**

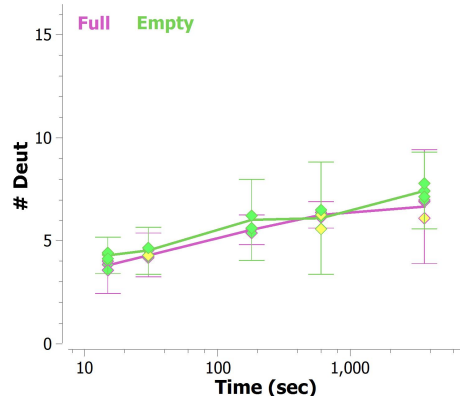

**AAV8\_VP1 326-350:  
VTQNEGKTIANNLSTSIQVFTDSE  
(#162)**

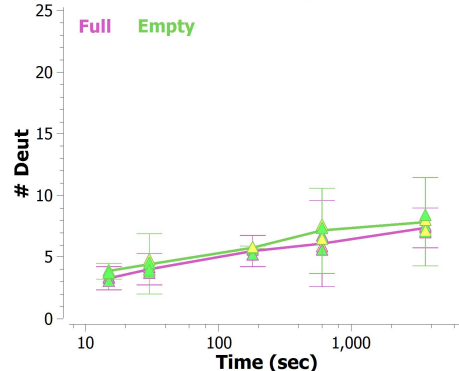

**AAV8\_VP1 330-342:  
EGTKTIANNLST (#163)**

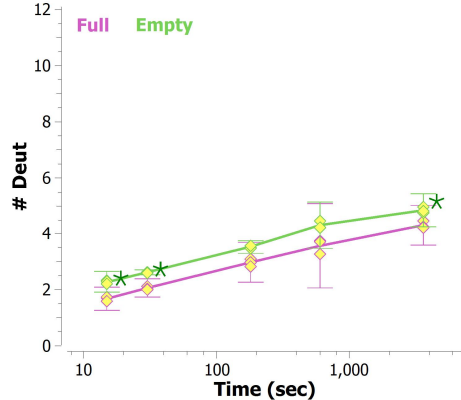

**AAV8\_VP1 335-339: IANNL  
(#164)**

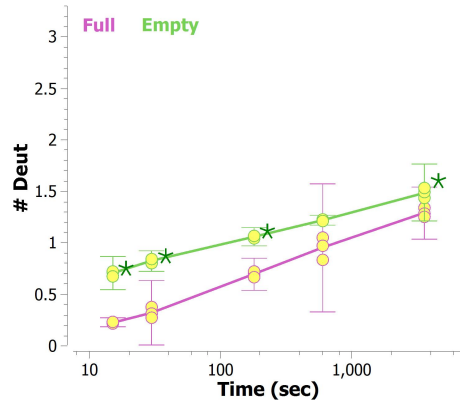

**AAV8\_VP1 335-342: IANNLST  
(#165)**

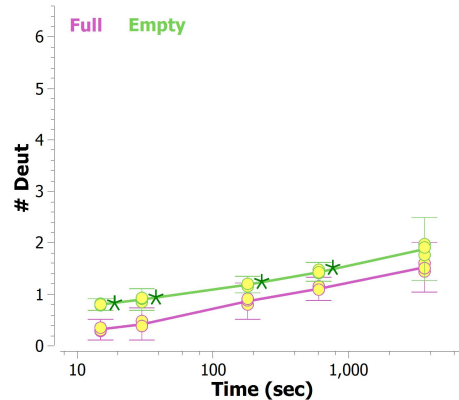

**AAV8\_VP1 340-345: TSTIQV  
(#166)**

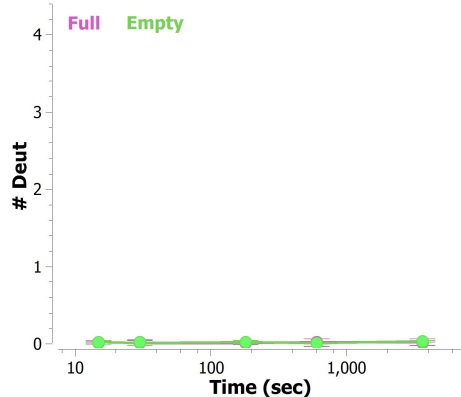

**AAV8\_VP1 340-346: TSTIQVF  
(#167)**

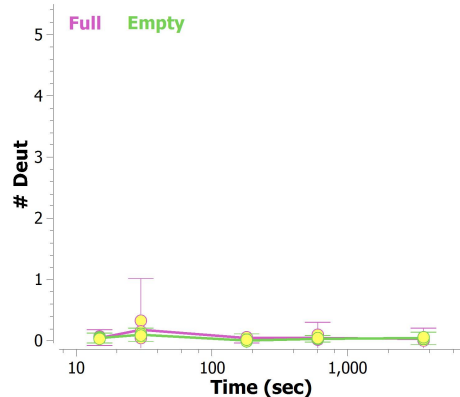

**AAV8\_VP1 340-350: TSTIQVFTDSE  
(#168)**

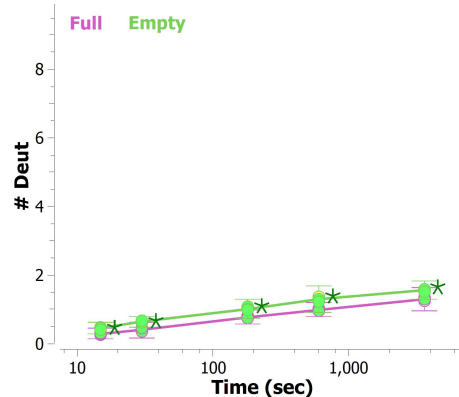



AAV8\_VP1 343-346: IQVF (#169)

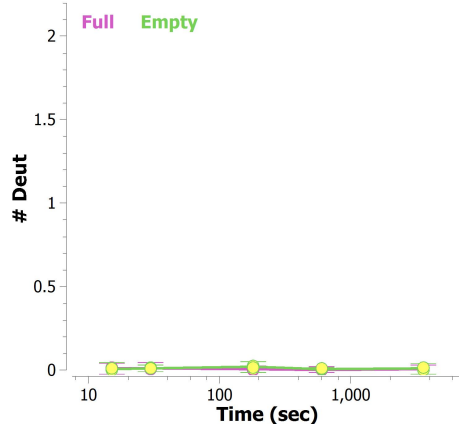

AAV8\_VP1 343-347: IQVFT (#170)

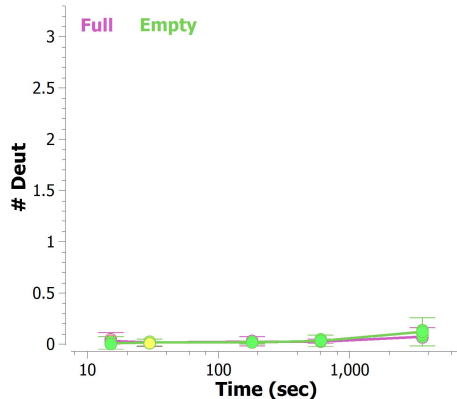

AAV8\_VP1 343-349: IQVFTDS (#171)

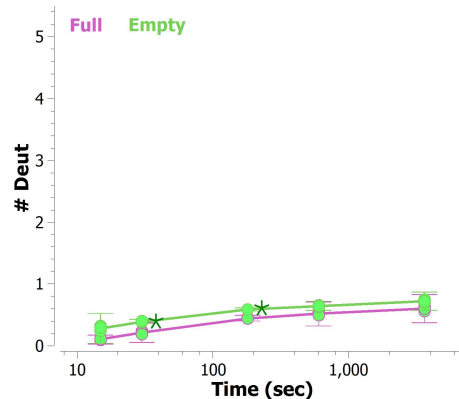

AAV8\_VP1 343-350: IQVFTDSE (#172)

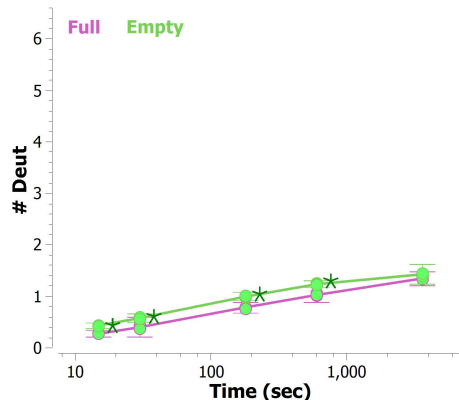

AAV8\_VP1 345-350: VFTDSE (#173)

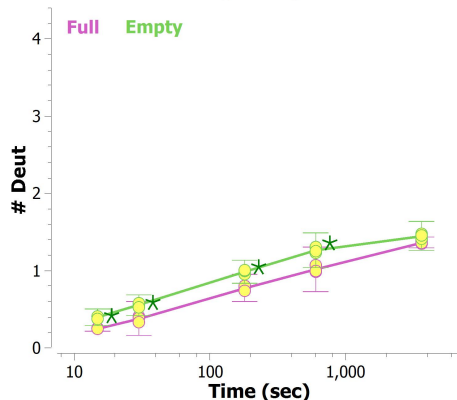

AAV8\_VP1 346-350: FTDSE (#174)

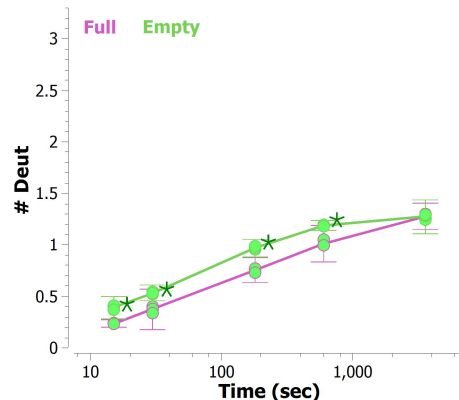

AAV8\_VP1 351-358: YQLPYVLG (#175)

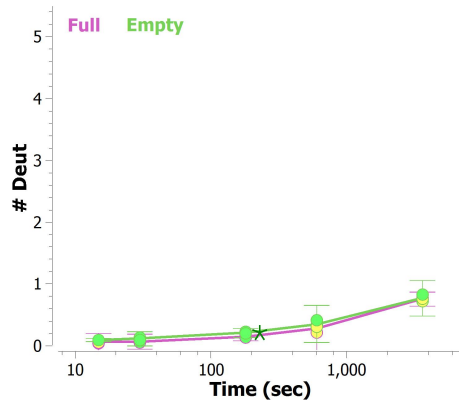

AAV8\_VP1 351-360: YQLPYVLGSA (#176)

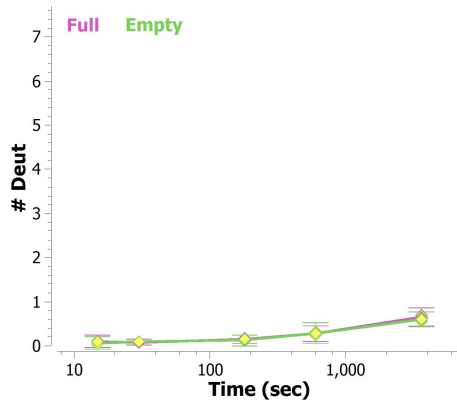

AAV8\_VP1 351-371: YQLPYVLGSAHQGCLPPFPAD (#177)

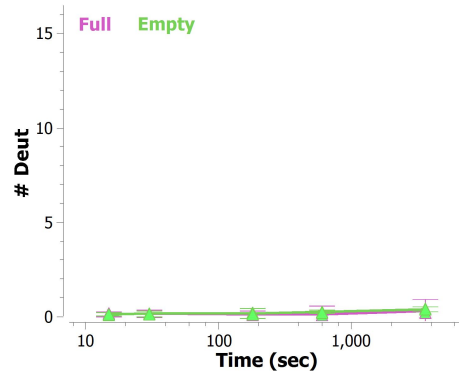

AAV8\_VP1 351-372: YQLPYVLGSAHQGCLPPFPADV (#178)

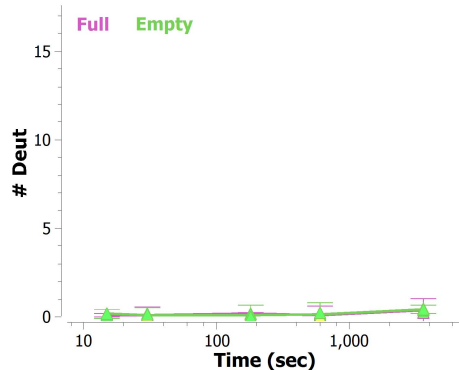

AAV8\_VP1 351-373: YQLPYVLGSAHQGCLPPFPADV (#179)

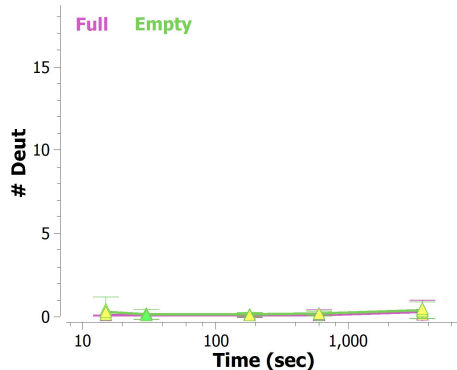

AAV8\_VP1 372-379: VFMIPQYG (#180)

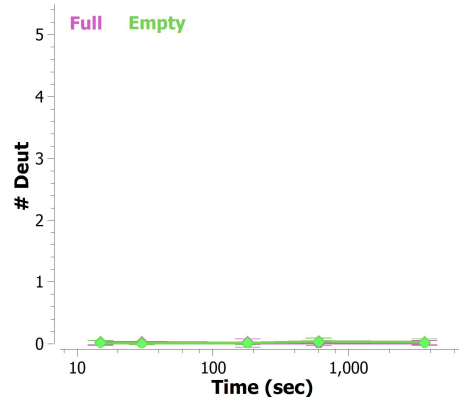

**AAV8\_VP1 372-380: VFIPQYGY  
(#181)**

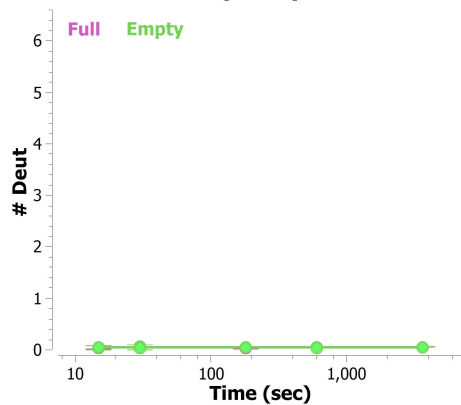

**AAV8\_VP1 372-381: VFIPQYGYL  
(#182)**

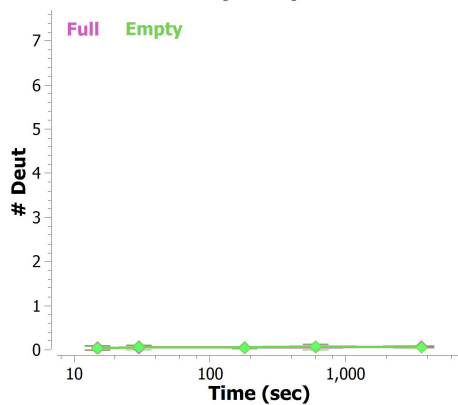

**AAV8\_VP1 373-379: FMIPQYGY  
(#183)**

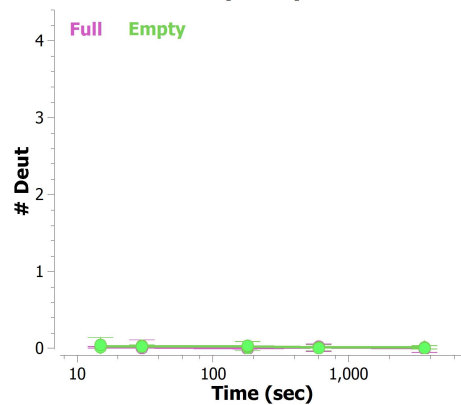

**AAV8\_VP1 373-380: FMIPQYGY  
(#184)**

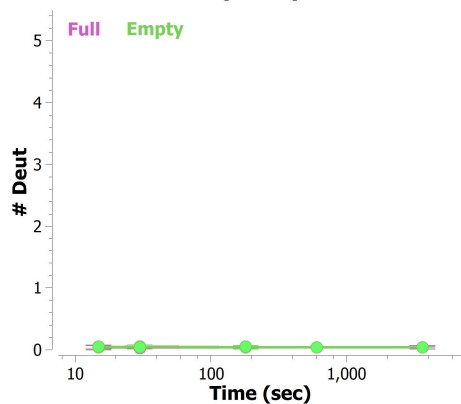

**AAV8\_VP1 373-381: FMIPQYGYL  
(#185)**

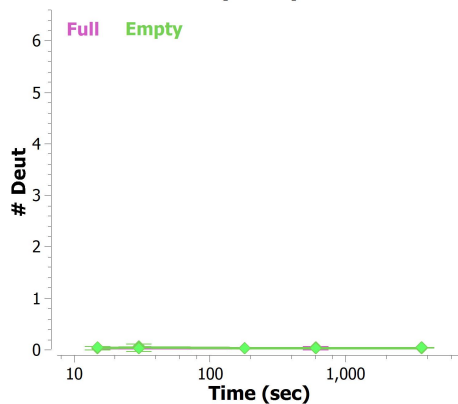

**AAV8\_VP1 373-388:  
FMIPQYGYLTLNNGSQ (#186)**

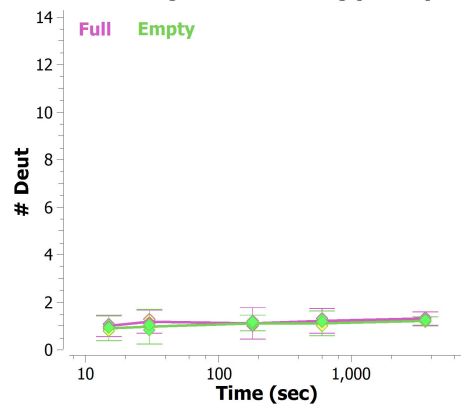

**AAV8\_VP1 373-395:  
FMIPQYGYLTLNNGSQAVGRSSF  
(#187)**

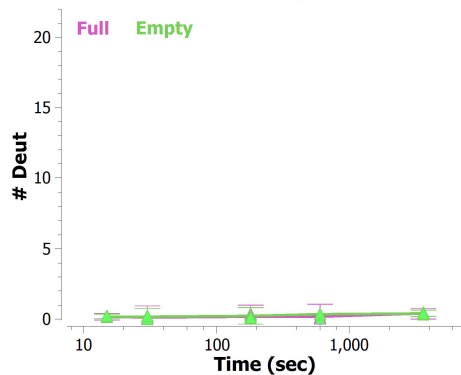

**AAV8\_VP1 374-380: MIPQYGY  
(#188)**

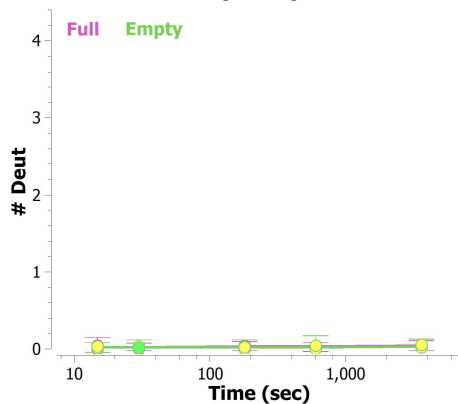

**AAV8\_VP1 374-381: MIPQYGYL  
(#189)**

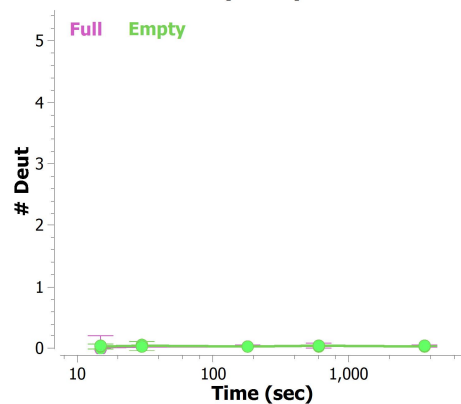

**AAV8\_VP1 374-383: MIPQYGYLTL  
(#190)**

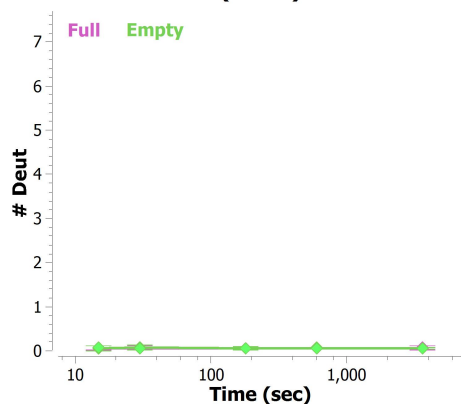

**AAV8\_VP1 374-388:  
MIPQYGYLTLNNGSQ (#191)**

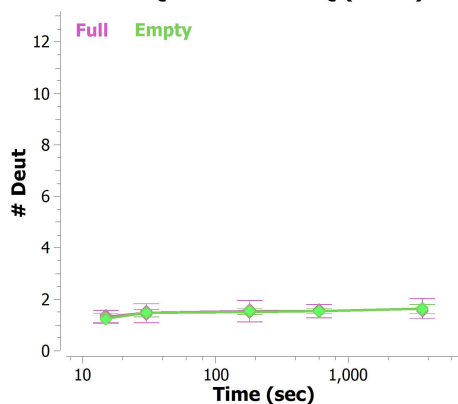

**AAV8\_VP1 374-395:  
MIPQYGYLTLNNGSQAVGRSSF  
(#192)**

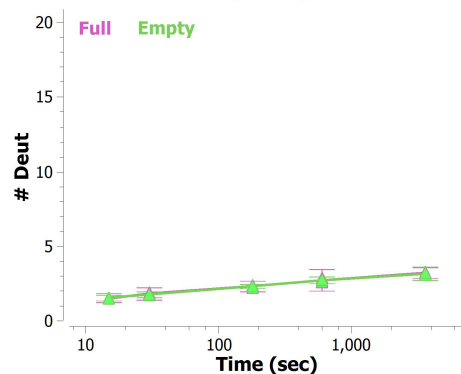

**AAV8\_VP1 375-381: IPQGYGL  
(#193)**

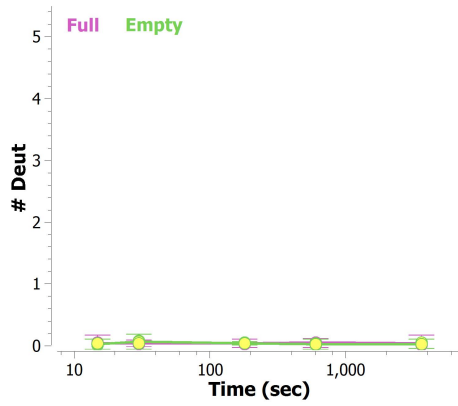

**AAV8\_VP1 375-383: IPQGYGLTL  
(#194)**

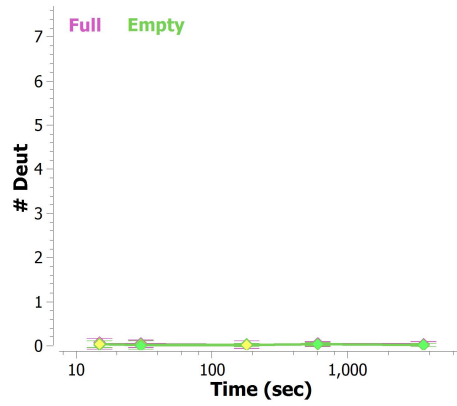

**AAV8\_VP1 375-395:  
IPQGYGLTLNNGSQAVGRSSF  
(#195)**

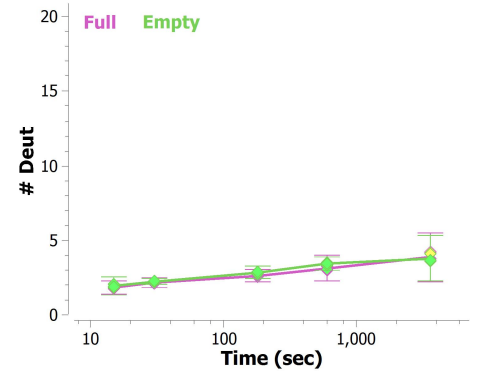

**AAV8\_VP1 376-380: PQYGY  
(#196)**

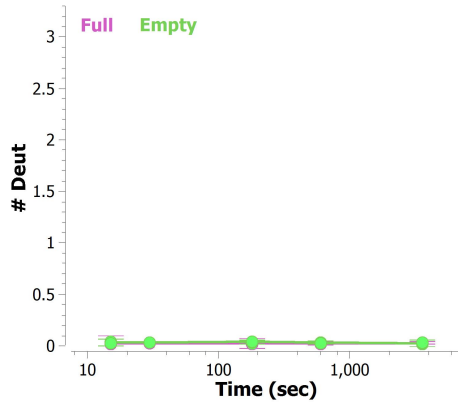

**AAV8\_VP1 380-388: YLTLNNGSQ  
(#197)**

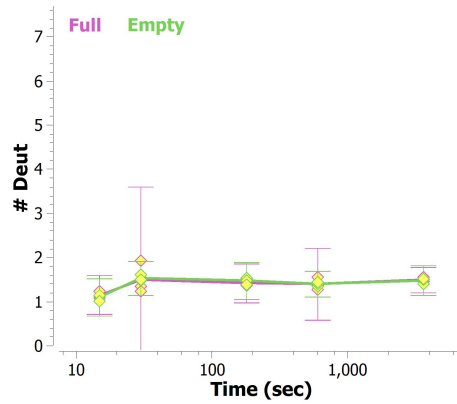

**AAV8\_VP1 380-395:  
YLTLNNGSQAVGRSSF (#198)**

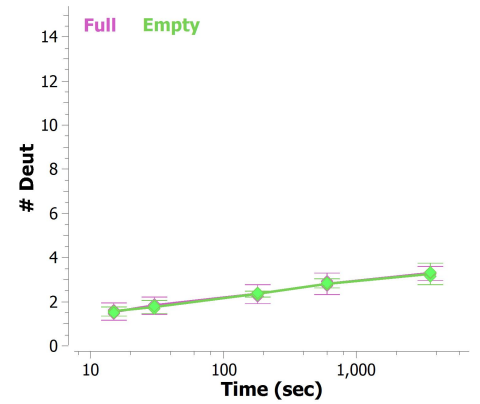

**AAV8\_VP1 381-388: LTLNNGSQ  
(#199)**

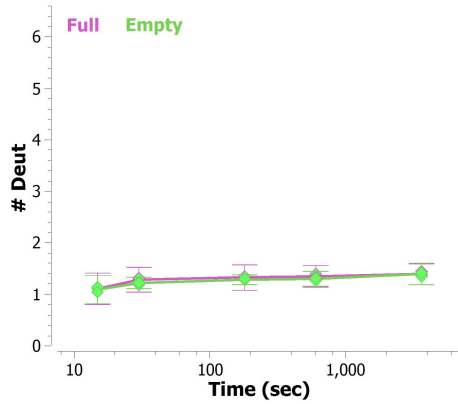

**AAV8\_VP1 381-395:  
LTLNNGSQAVGRSSF (#200)**

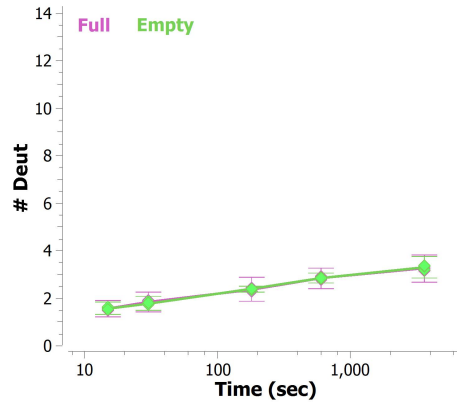

**AAV8\_VP1 382-388: TLNNGSQ  
(#201)**

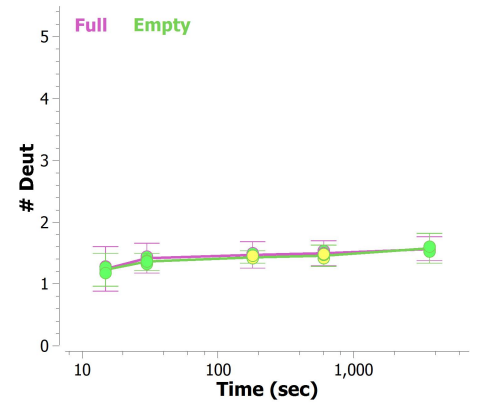

**AAV8\_VP1 382-389: TLNNGSQA  
(#202)**

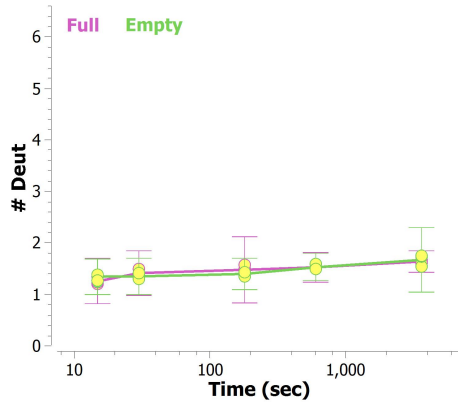

**AAV8\_VP1 382-395:  
TLNNGSQAVGRSSF (#203)**

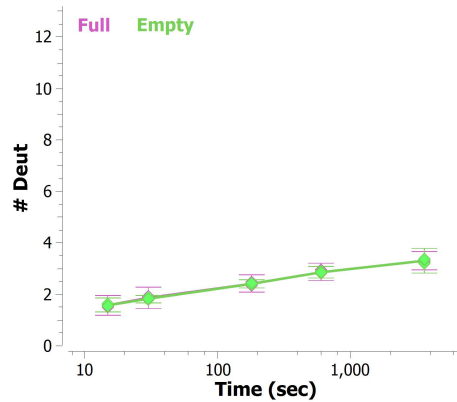

**AAV8\_VP1 384-395:  
NNGSQAVGRSSF (#204)**

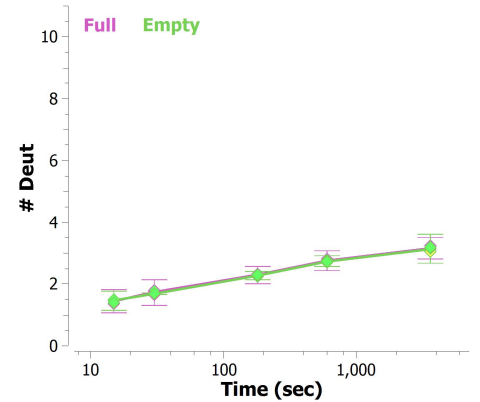

**AAV8\_VP1 390-395: VGRSSF (#205)**

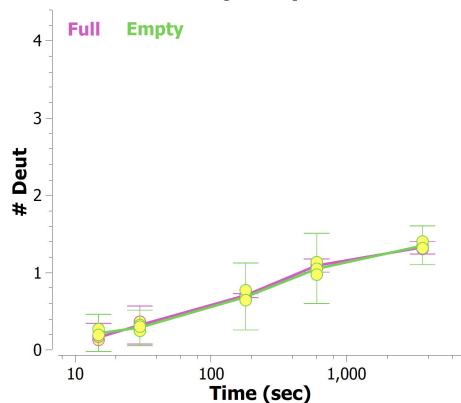

**AAV8\_VP1 391-395: GRSSF (#206)**

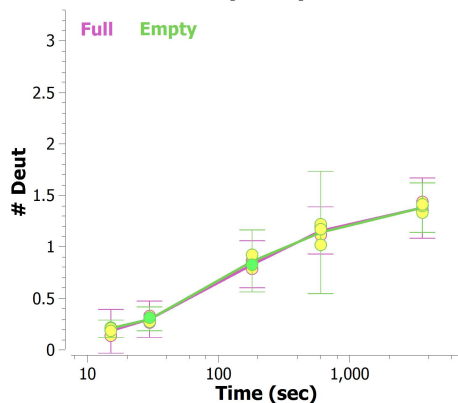

**AAV8\_VP1 396-399: YCLE (#207)**

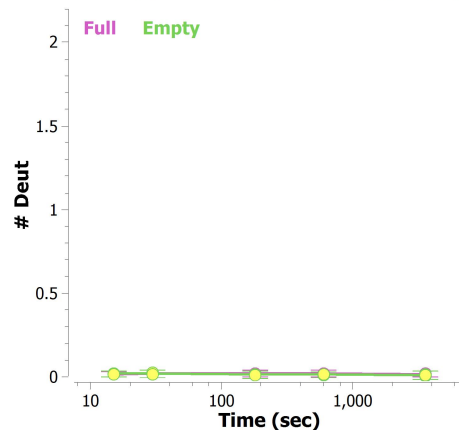

**AAV8\_VP1 396-405: YCLEYFPSQM (#208)**

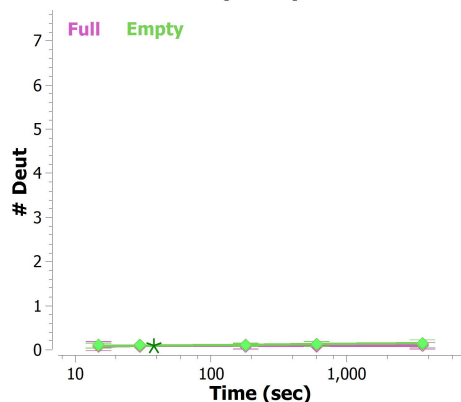

**AAV8\_VP1 396-411: YCLEYFPSQMLRTGNN (#209)**

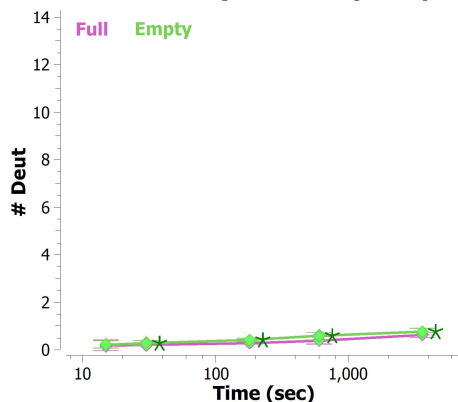

**AAV8\_VP1 397-405: CLEYFPSQM (#210)**

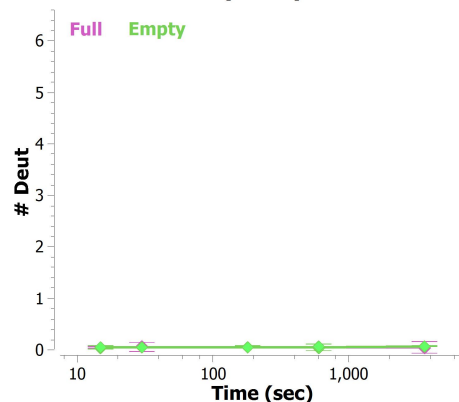

**AAV8\_VP1 399-404: EYFPSQ (#211)**

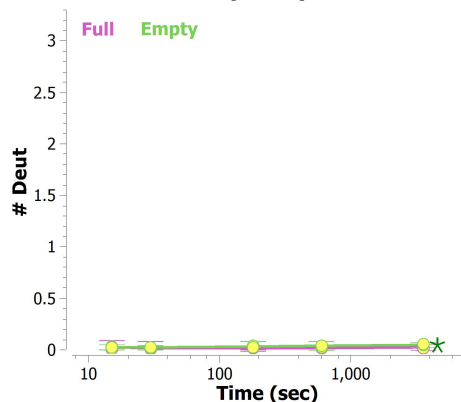

**AAV8\_VP1 399-405: EYFPSQM (#212)**

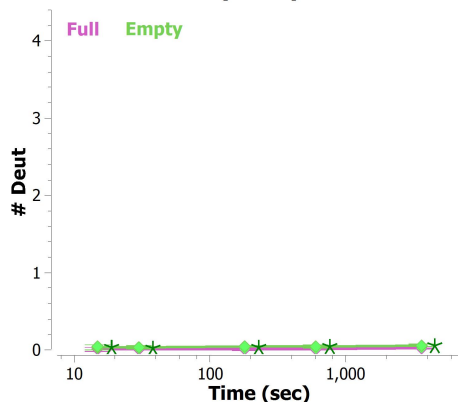

**AAV8\_VP1 399-411: EYFPSQMLRTGNN (#213)**

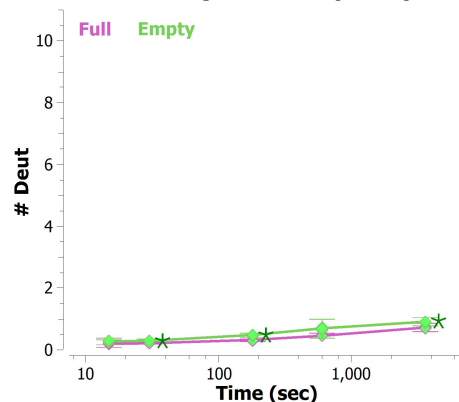

**AAV8\_VP1 400-405: YFPSQM (#214)**

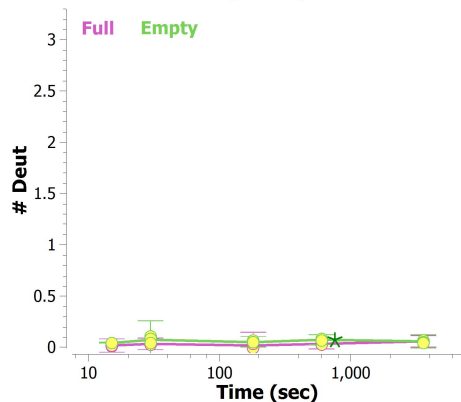

**AAV8\_VP1 405-411: MLRTGNN (#215)**

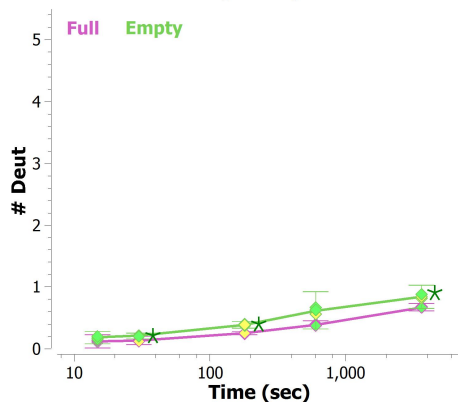

**AAV8\_VP1 405-413: MLRTGNNFQ (#216)**

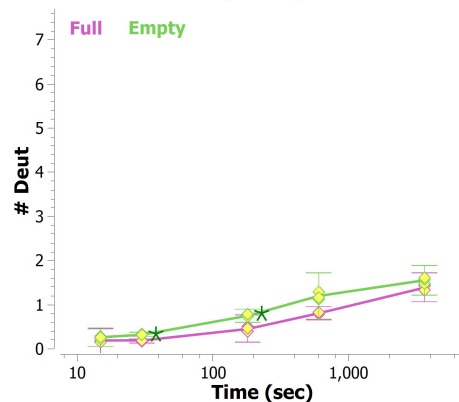

**AAV8\_VP1 406-411: LRTGNN (#217)**

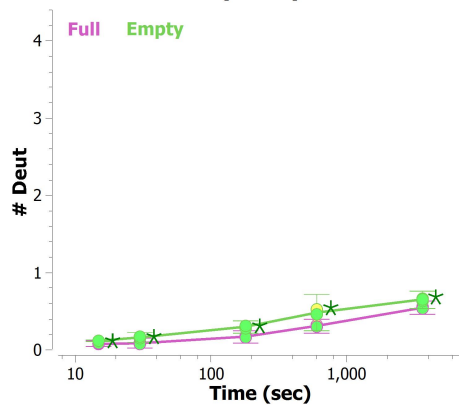

**AAV8\_VP1 406-412: LRTGNNF (#218)**

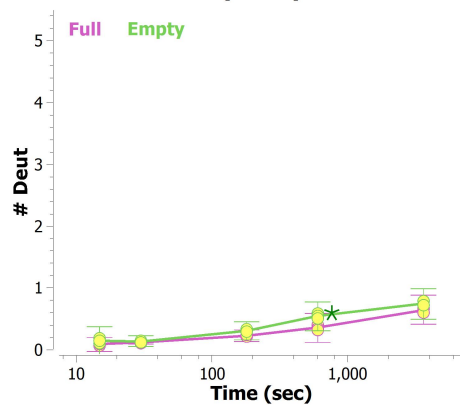

**AAV8\_VP1 406-413: LRTGNNFQ (#219)**

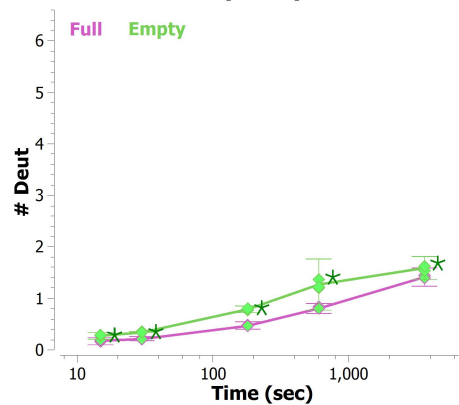

**AAV8\_VP1 406-414: LRTGNNFQF (#220)**

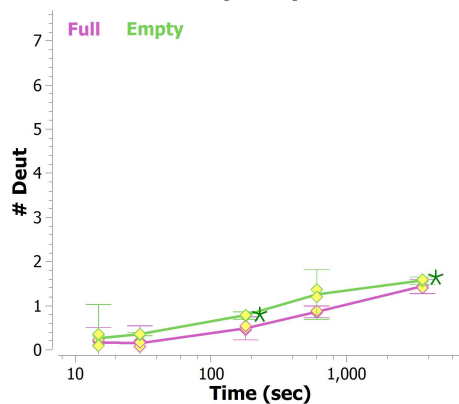

**AAV8\_VP1 406-415: LRTGNNFQFT (#221)**

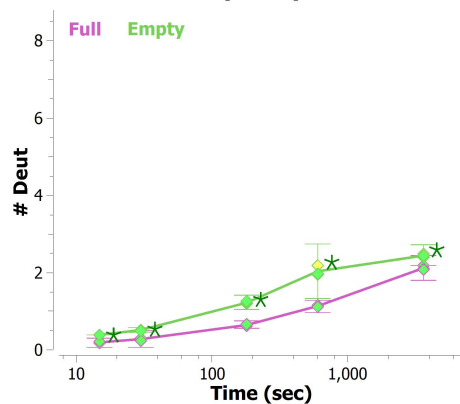

**AAV8\_VP1 406-417: LRTGNNFQFTYT (#222)**

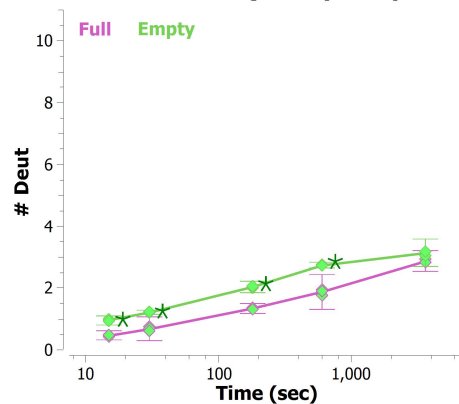

**AAV8\_VP1 412-417: FQFTYT (#223)**

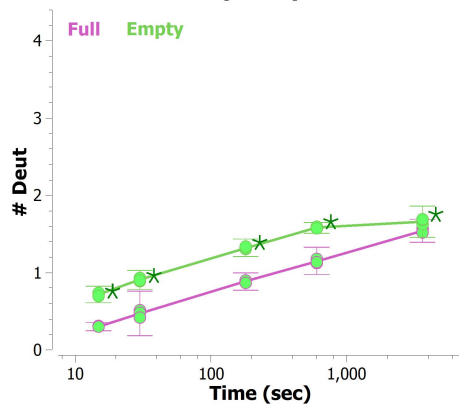

**AAV8\_VP1 412-418: FQFTYTF (#224)**

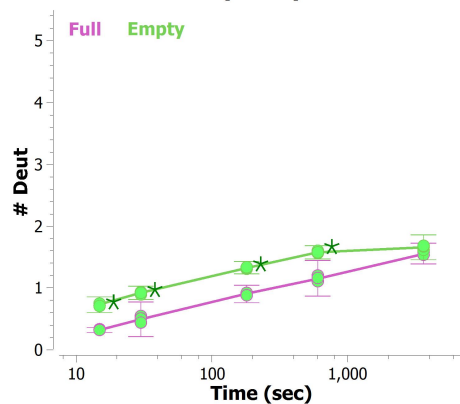

**AAV8\_VP1 412-419: FQFTYTFE (#225)**

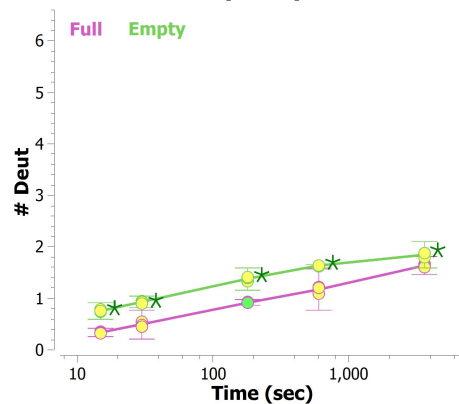

**AAV8\_VP1 413-417: QFTYT (#226)**

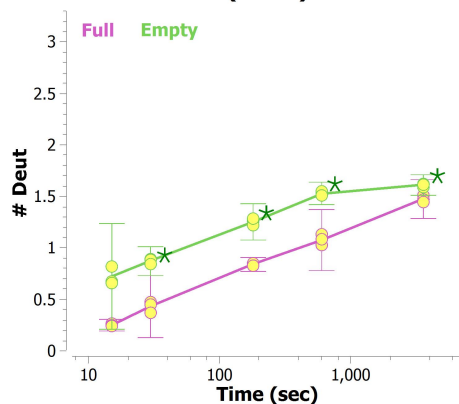

**AAV8\_VP1 414-418: FTYTF (#227)**

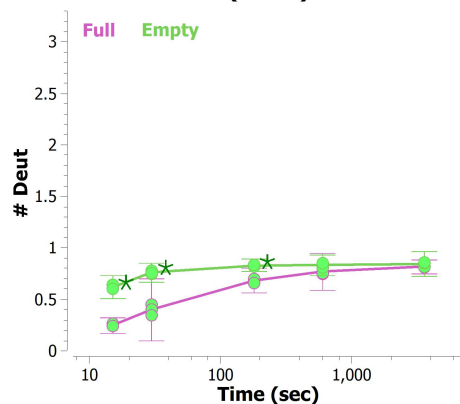

**AAV8\_VP1 414-433: FTYTFDVPFHSSYAHSQSL (#228)**

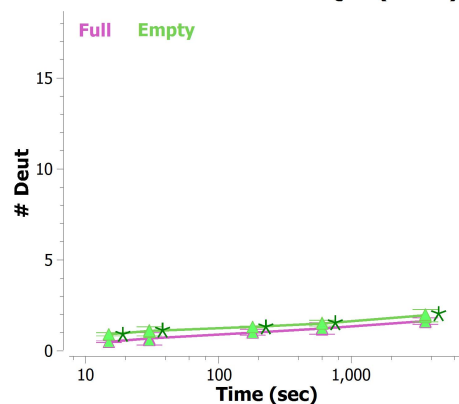

**AAV8\_VP1 415-433:  
TYTFEDVPFHSSYAHSQSL (#229)**

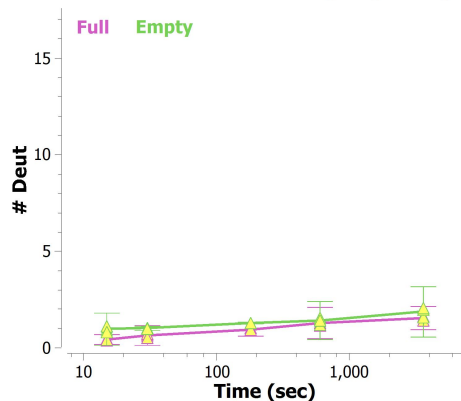

**AAV8\_VP1 416-433:  
YTFEDVPFHSSYAHSQSL (#230)**

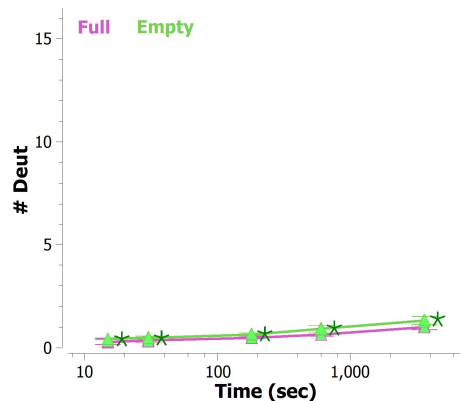

**AAV8\_VP1 418-426: FEDVPFHSS  
(#231)**

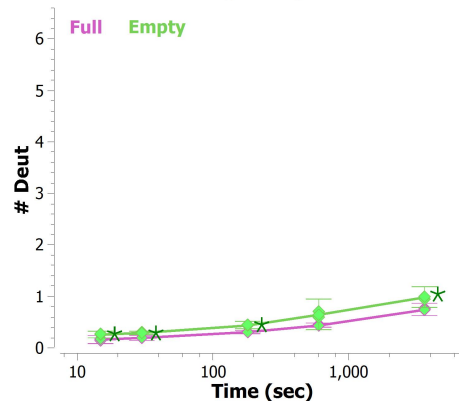

**AAV8\_VP1 418-427: FEDVPFHSSY  
(#232)**

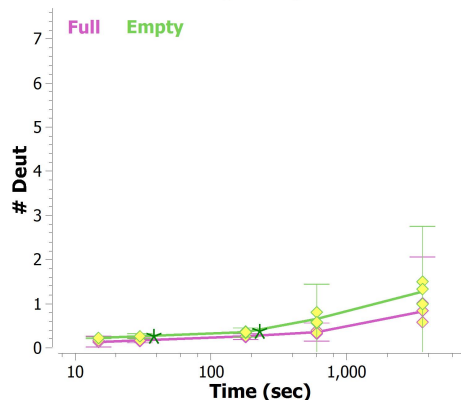

**AAV8\_VP1 418-428: FEDVPFHSSYA  
(#233)**

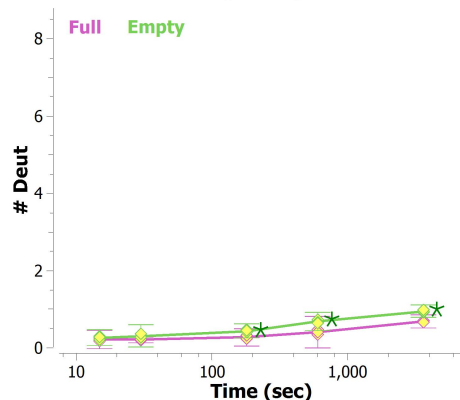

**AAV8\_VP1 418-430:  
FEDVPFHSSYAHS (#234)**

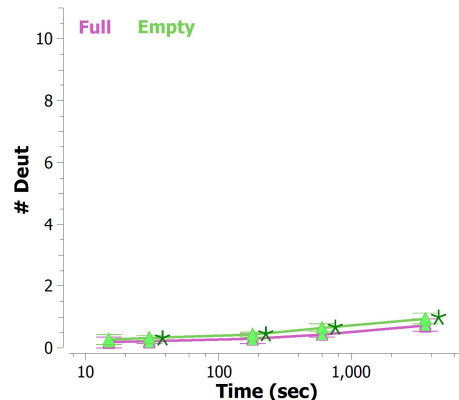

**AAV8\_VP1 418-433:  
FEDVPFHSSYAHSQSL (#235)**

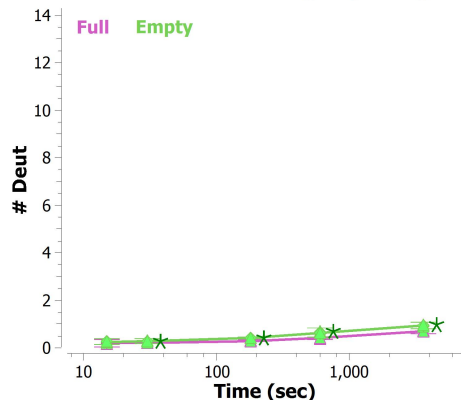

**AAV8\_VP1 418-434:  
FEDVPFHSSYAHSQSLD (#236)**

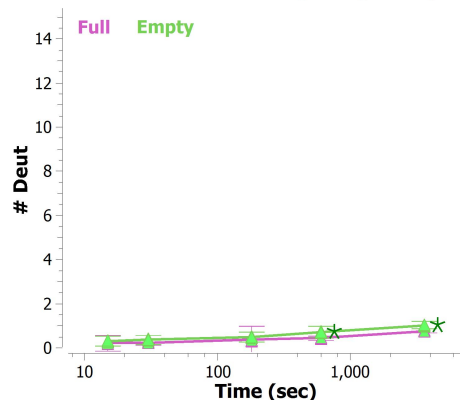

**AAV8\_VP1 419-430:  
EDVPFHSSYAHS (#237)**

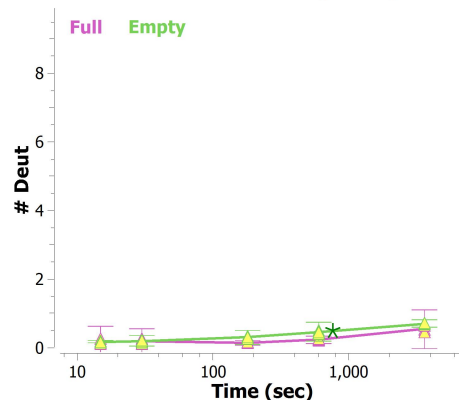

**AAV8\_VP1 419-433:  
EDVPFHSSYAHSQSL (#238)**

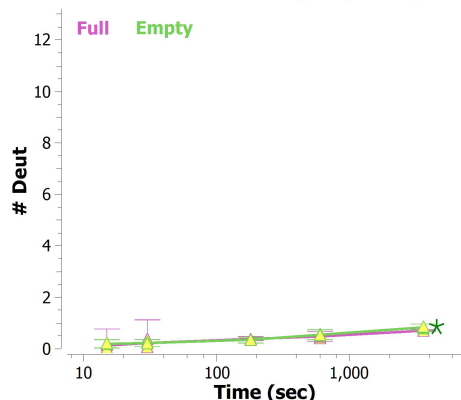

**AAV8\_VP1 419-443:  
EDVPFHSSYAHSQSLDRLMNPLIDQ  
(#239)**

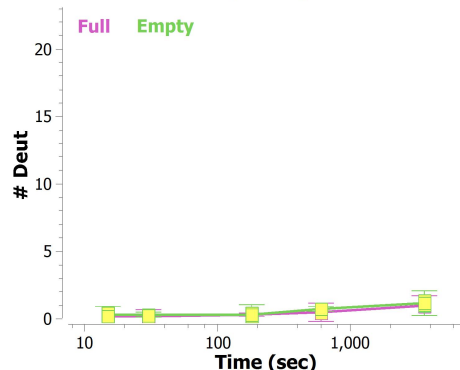

**AAV8\_VP1 420-433:  
DVPFHSSYAHSQSL (#240)**

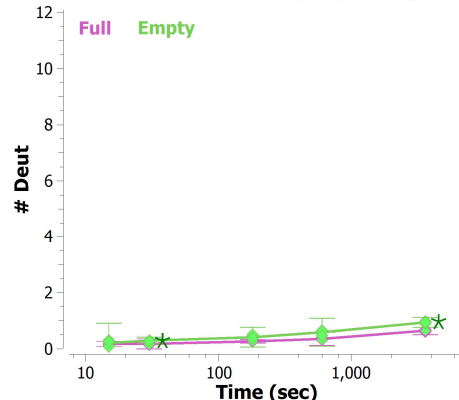



**AAV8\_VP1 420-443:  
DVPFHSSYAHSQSLDRLMNPLIDQ  
(#241)**

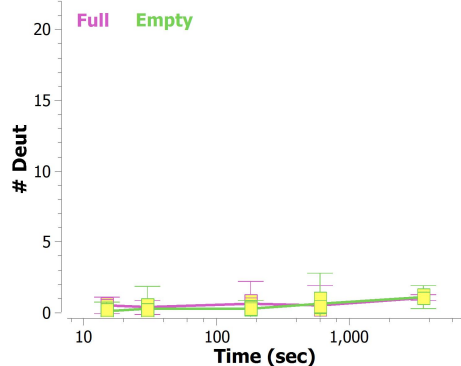

**AAV8\_VP1 422-433:  
PFHSSYAHSQSL (#242)**

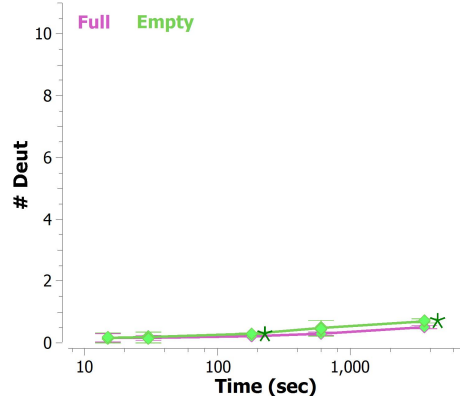

**AAV8\_VP1 427-433: YAHSQSL  
(#243)**

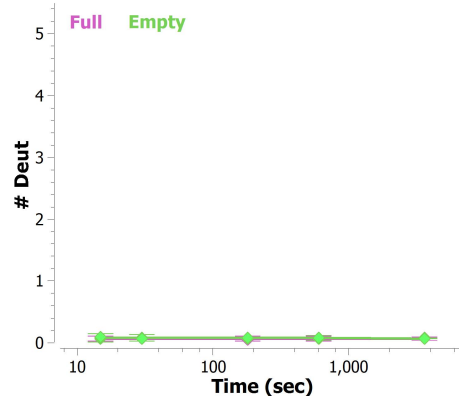

**AAV8\_VP1 429-433: HSQSL  
(#244)**

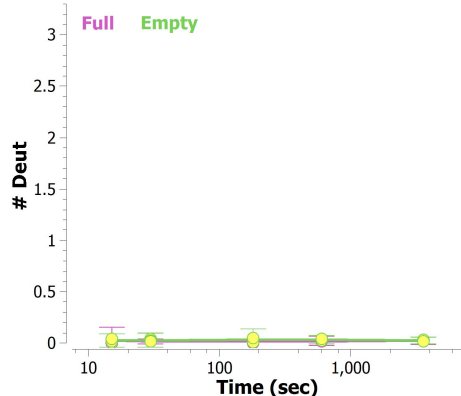

**AAV8\_VP1 434-442: DRLMNPLID  
(#245)**

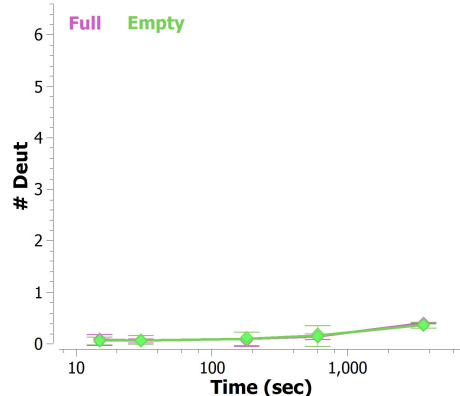

**AAV8\_VP1 434-443: DRLMNPLIDQ  
(#246)**

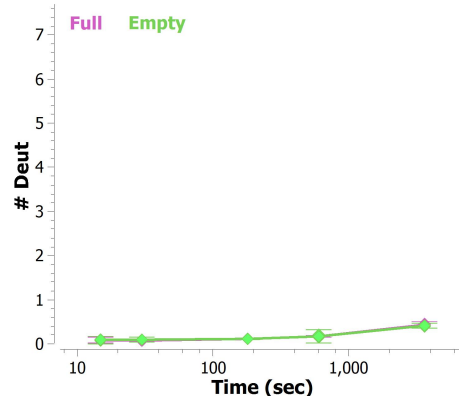

**AAV8\_VP1 434-444:  
DRLMNPLIDQY (#247)**

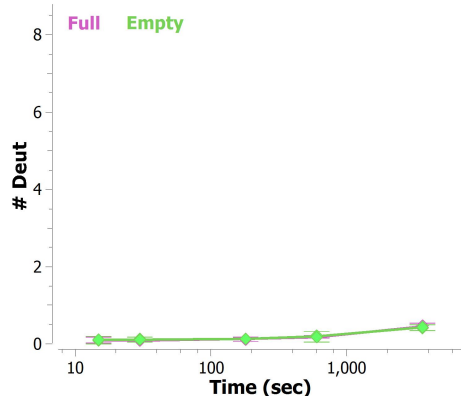

**AAV8\_VP1 434-445:  
DRLMNPLIDQYL (#248)**

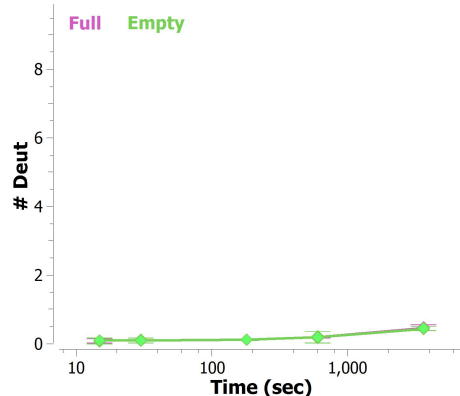

**AAV8\_VP1 434-447:  
DRLMNPLIDQYLYY (#249)**

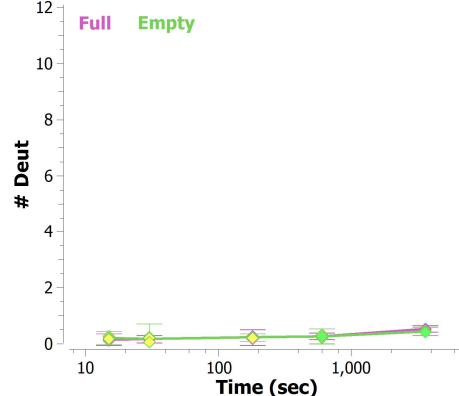

**AAV8\_VP1 435-443: RLMNPLIDQ  
(#250)**

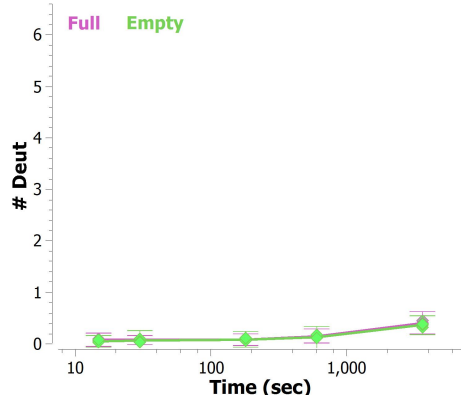

**AAV8\_VP1 435-445:  
RLMNPLIDQYL (#251)**

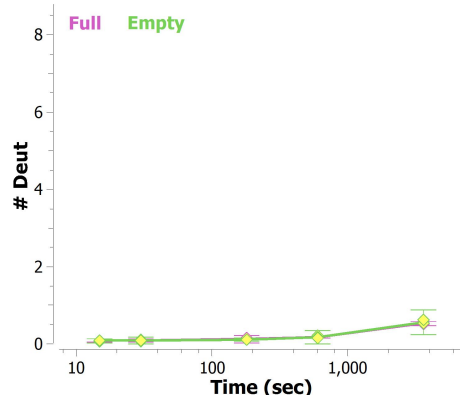

**AAV8\_VP1 441-445: IDQYL  
(#252)**

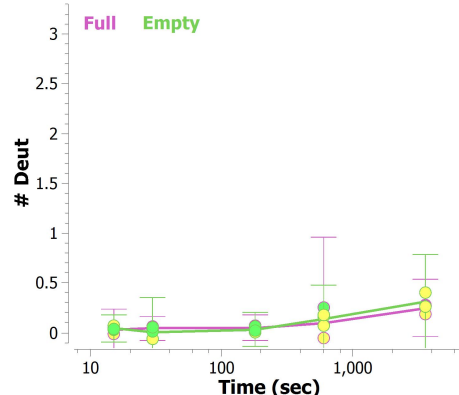

AAV8\_VP1 444-447: YLYY (#253)

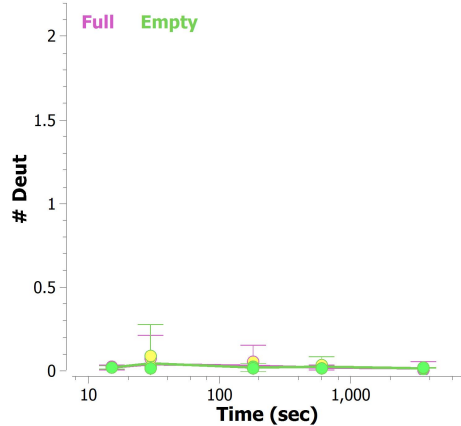

AAV8\_VP1 444-460: YLYLSRTQTGGTANT (#254)

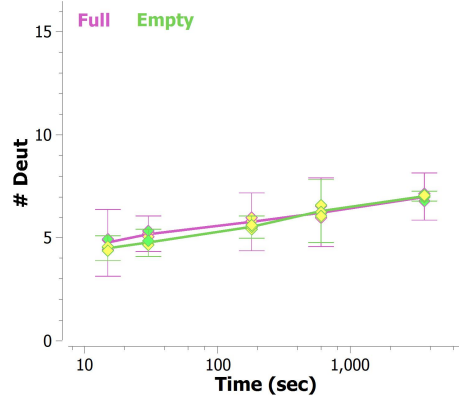

AAV8\_VP1 446-451: YYLSRT (#255)

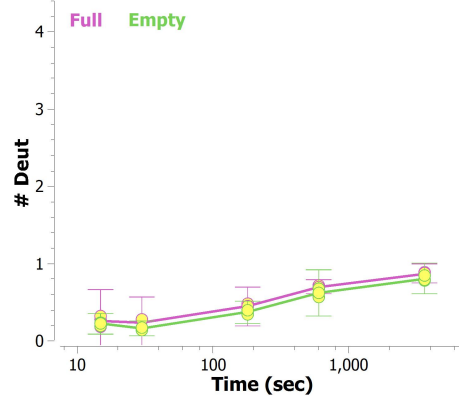

AAV8\_VP1 446-453: YYLSRTQT (#256)

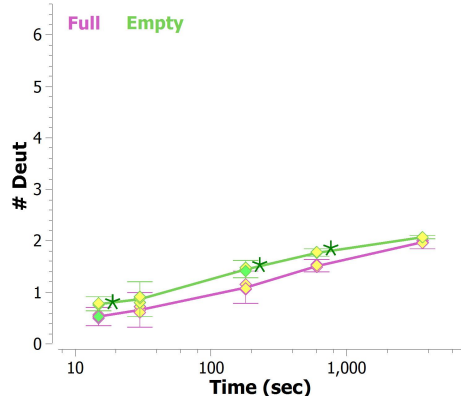

AAV8\_VP1 446-454: YYLSRTQTT (#257)

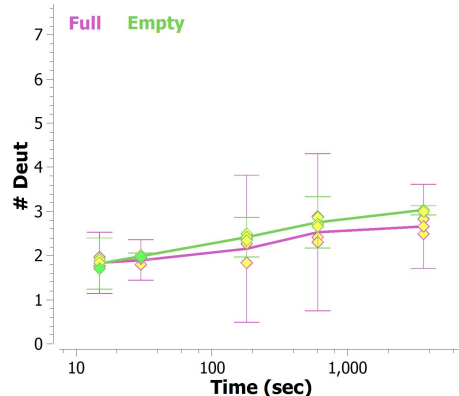

AAV8\_VP1 446-455: YYLSRTQTTG (#258)

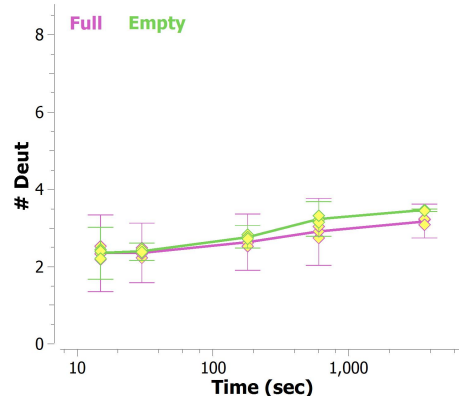

AAV8\_VP1 446-458: YYLSRTQTGGTA (#259)

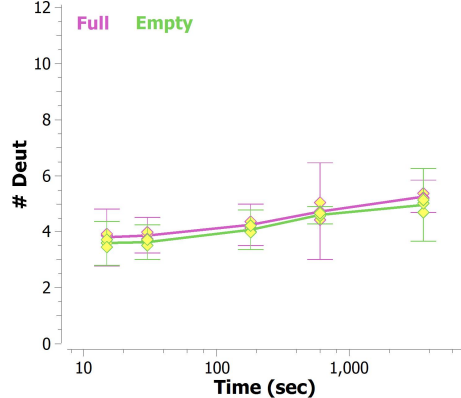

AAV8\_VP1 446-460: YYLSRTQTGGTANT (#260)

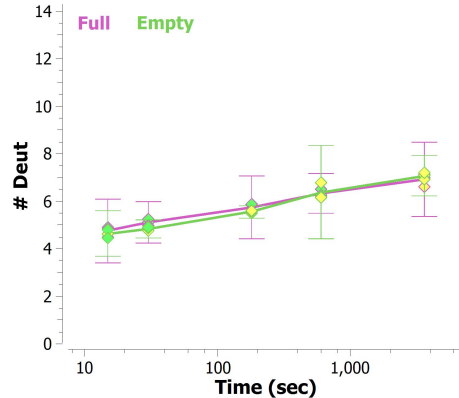

AAV8\_VP1 446-462: YYLSRTQTGGTANTQT (#261)

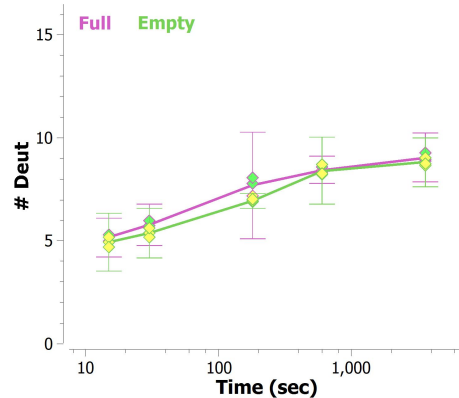

AAV8\_VP1 446-463: YYLSRTQTGGTANTQTL (#262)

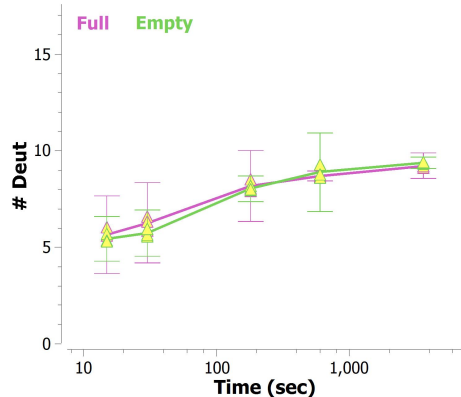

AAV8\_VP1 446-464: YYLSRTQTGGTANTQTLG (#263)

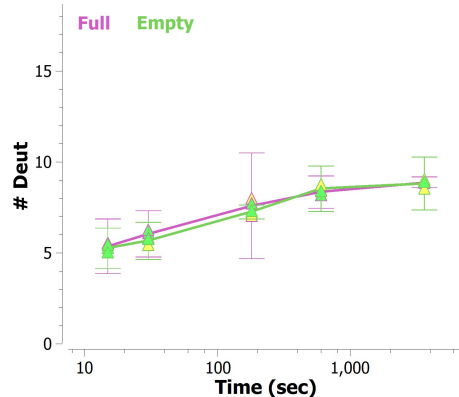

AAV8\_VP1 446-465: YYLSRTQTGGTANTQTLGF (#264)

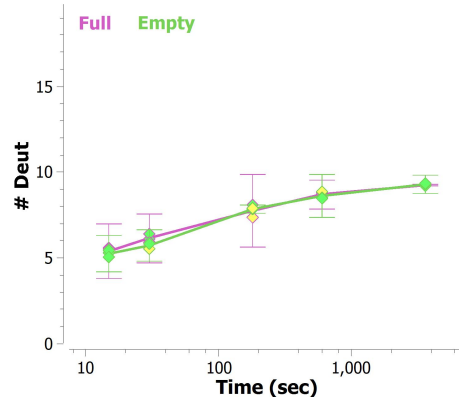

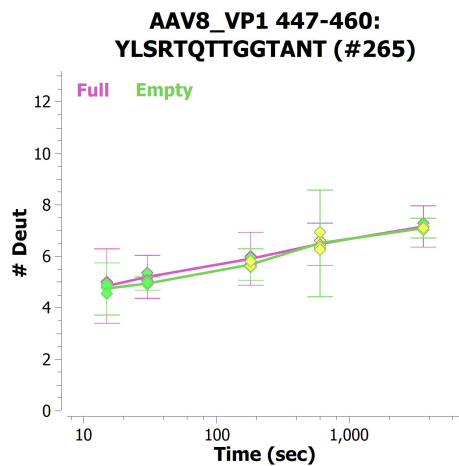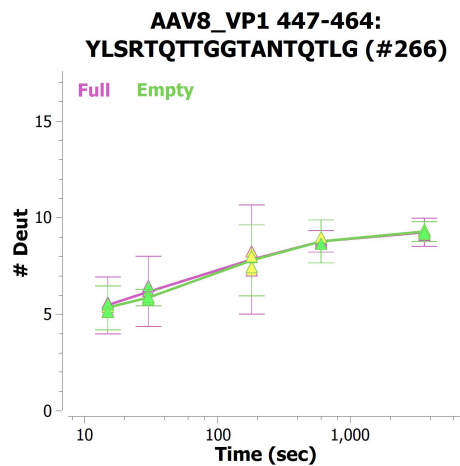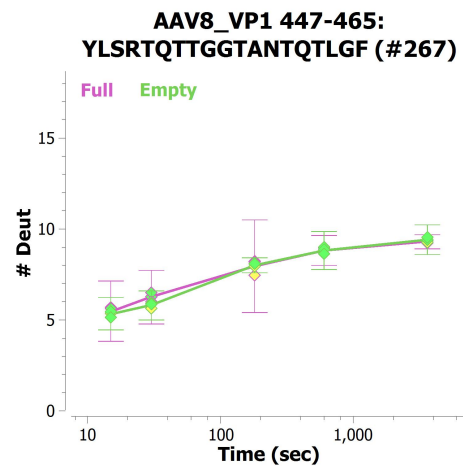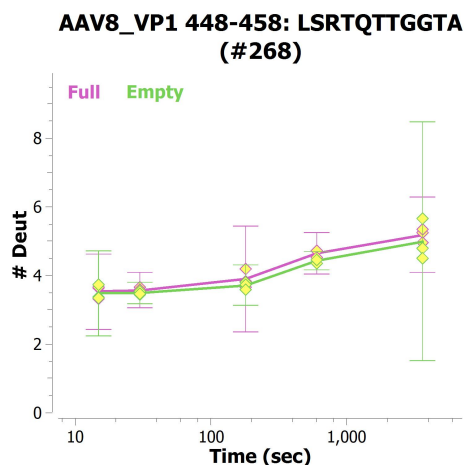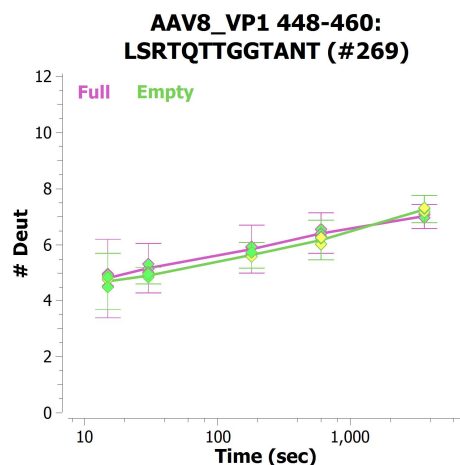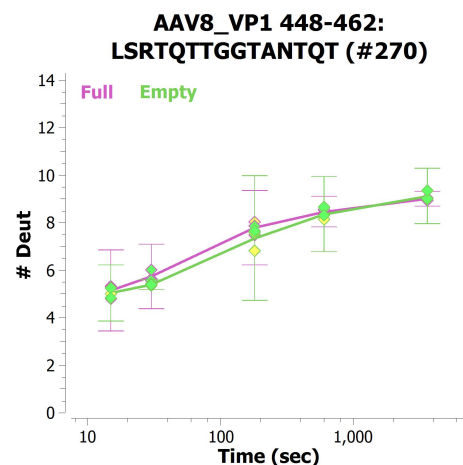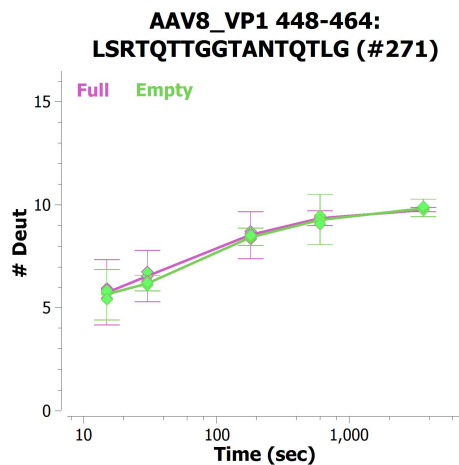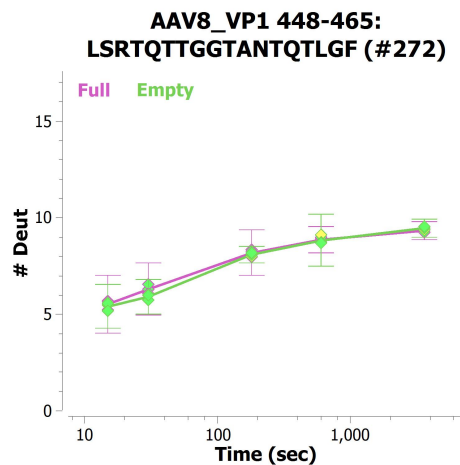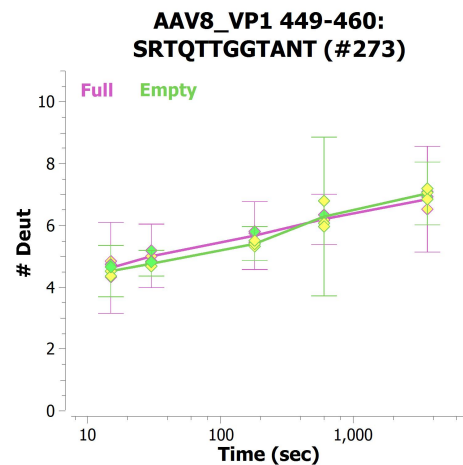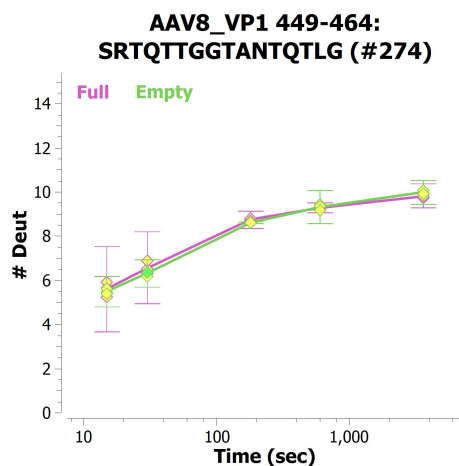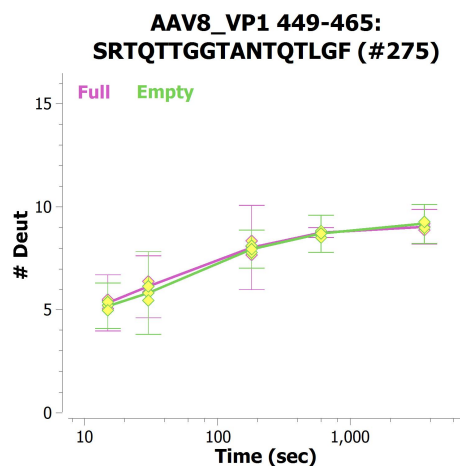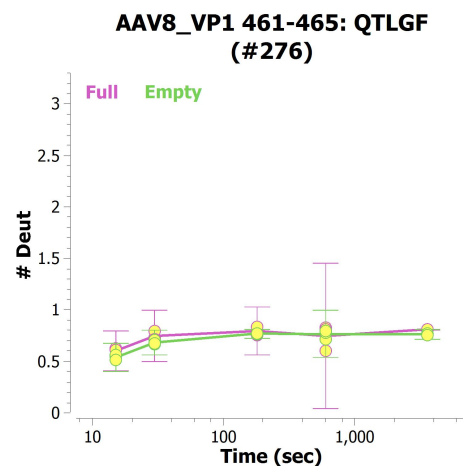

**AAV8\_VP1 461-472:  
QTLGFSQGGPNT (#277)**

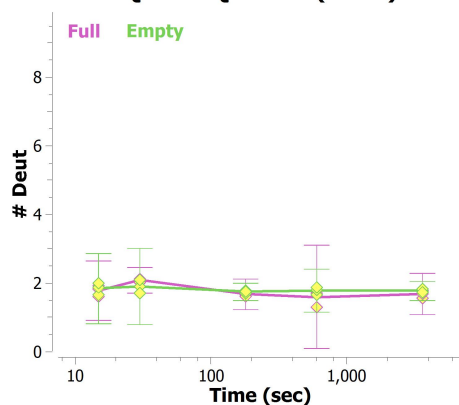

**AAV8\_VP1 461-486:  
QTLGFSQGGPNTMANQAKNWLPGPCY  
(#278)**

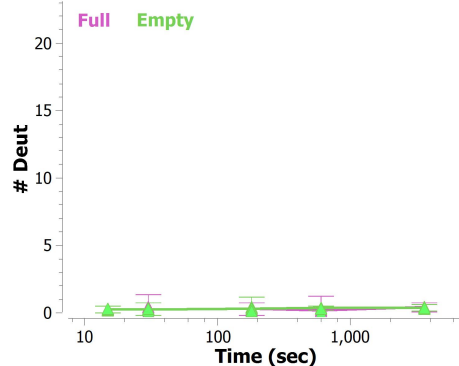

**AAV8\_VP1 465-486:  
FSQGGPNTMANQAKNWLPGPCY  
(#279)**

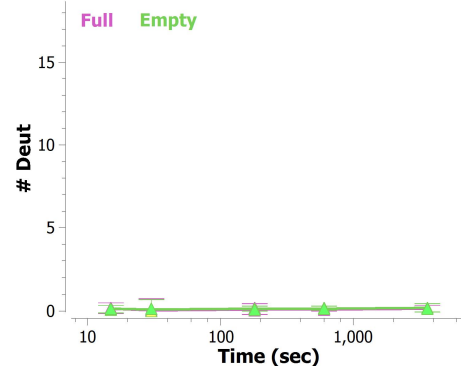

**AAV8\_VP1 466-472: SQGGPNT  
(#280)**

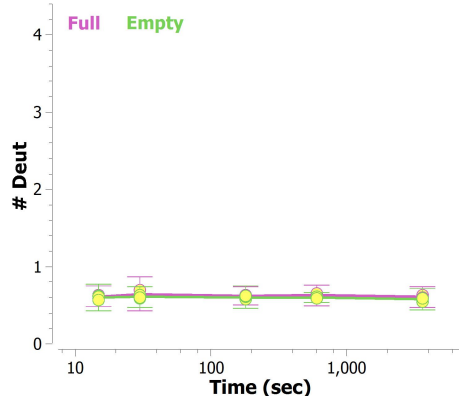

**AAV8\_VP1 466-486:  
SQGGPNTMANQAKNWLPGPCY  
(#281)**

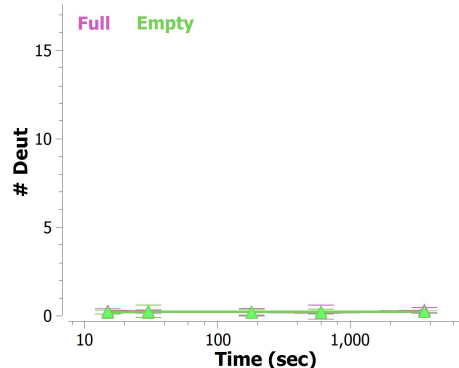

**AAV8\_VP1 466-498:  
PNTMANQAKNWLPGPCYRQQRVSTT  
(#282)**

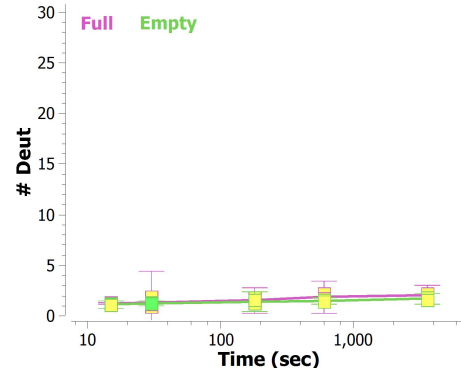

**AAV8\_VP1 466-502:  
TMANQAKNWLPGPCYRQQRVSTTTG  
(#283)**

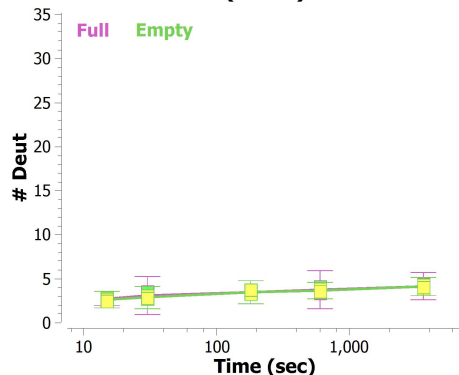

**AAV8\_VP1 466-503:  
TMANQAKNWLPGPCYRQQRVSTTTG  
(#284)**

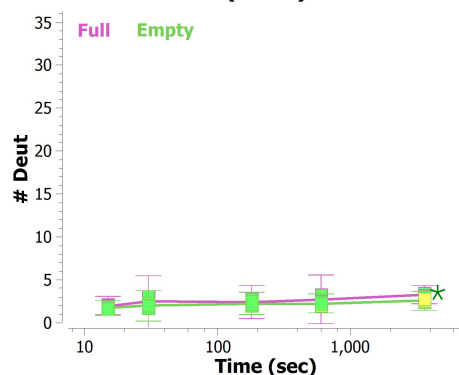

**AAV8\_VP1 473-486:  
MANQAKNWLPGPCY (#285)**

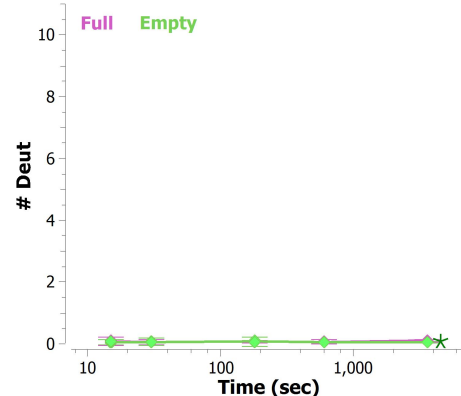

**AAV8\_VP1 473-503:  
IQAKNWLPGPCYRQQRVSTTTGQNNN  
(#286)**

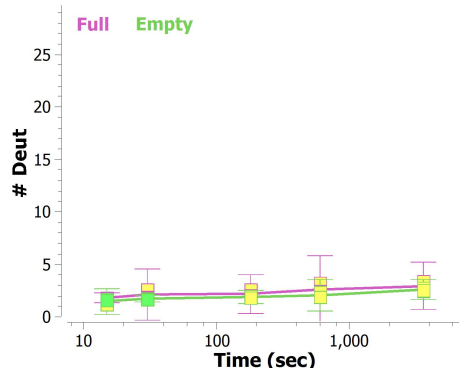

**AAV8\_VP1 474-486:  
ANQAKNWLPGPCY (#287)**

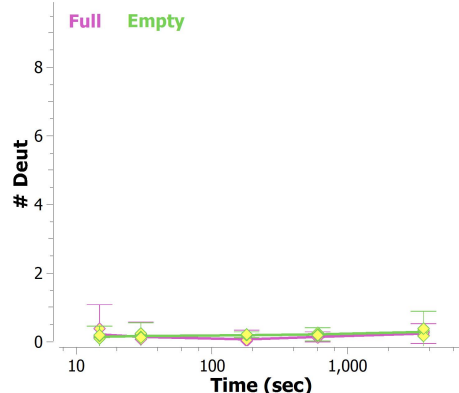

**AAV8\_VP1 474-503:  
QAKNWLPGPCYRQQRVSTTTGQNNN  
(#288)**

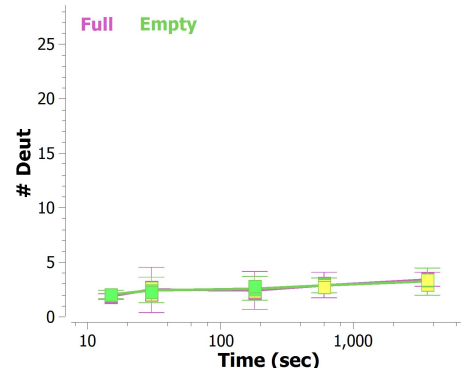

**AAV8\_VP1 475-503:  
AKNWLPGPCYRQQRVSTTTGQNNNS  
(#289)**

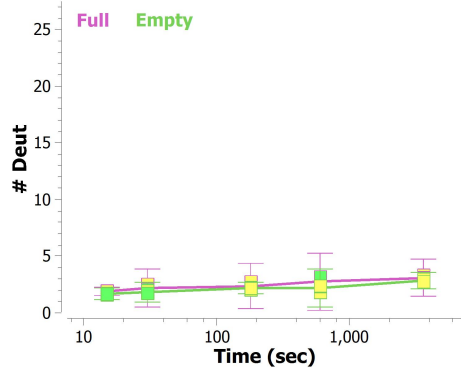

**AAV8\_VP1 476-503:  
AKNWLPGPCYRQQRVSTTTGQNNNS  
(#290)**

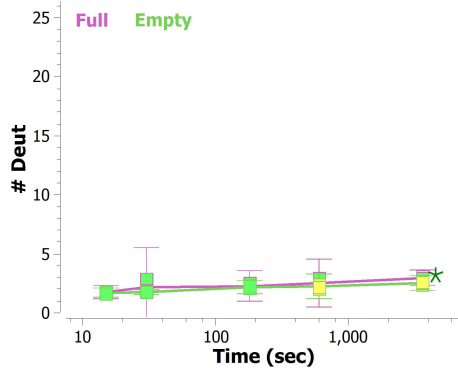

**AAV8\_VP1 477-486: AKNWLPGPCY  
(#291)**

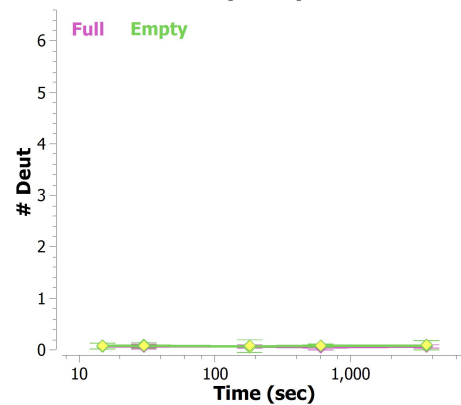

**AAV8\_VP1 477-503:  
KNWLPGPCYRQQRVSTTTGQNNNSN  
(#292)**

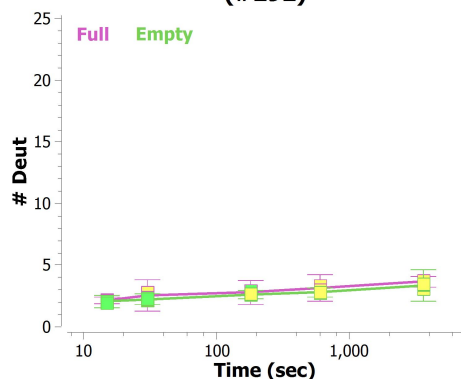

**AAV8\_VP1 486-503:  
YRQQRVSTTTGQNNNSNF (#293)**

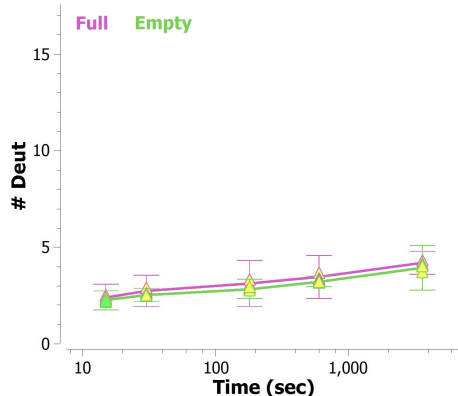

**AAV8\_VP1 487-498:  
RQQRVSTTTGQN (#294)**

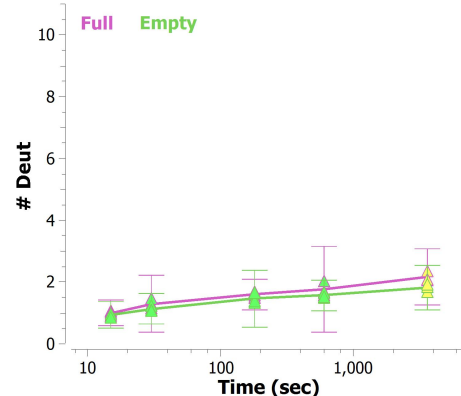

**AAV8\_VP1 487-503:  
RQQRVSTTTGQNNNSNF (#295)**

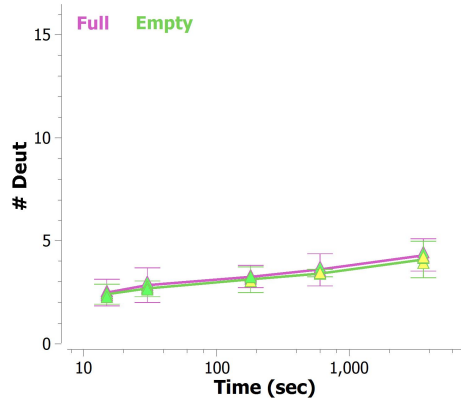

**AAV8\_VP1 487-504:  
RQQRVSTTTGQNNNSNFA (#296)**

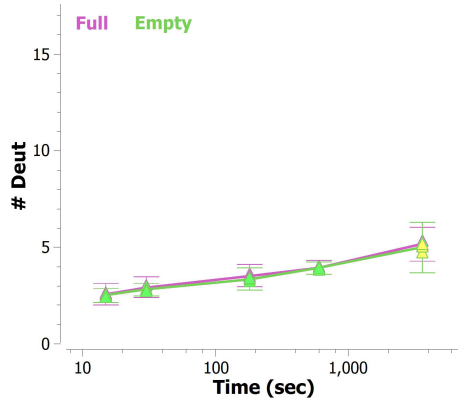

**AAV8\_VP1 488-517:  
RVSTTTGQNNNSNFAWTAGTKYHLNG  
(#297)**

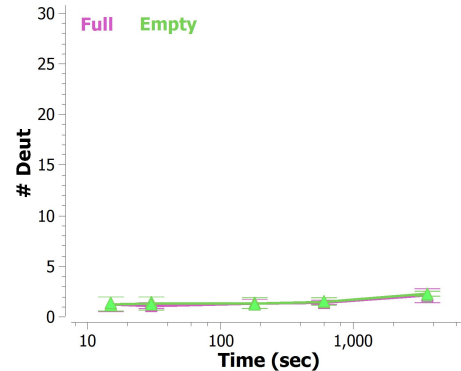

**AAV8\_VP1 494-503: TTGQNNNSNF  
(#298)**

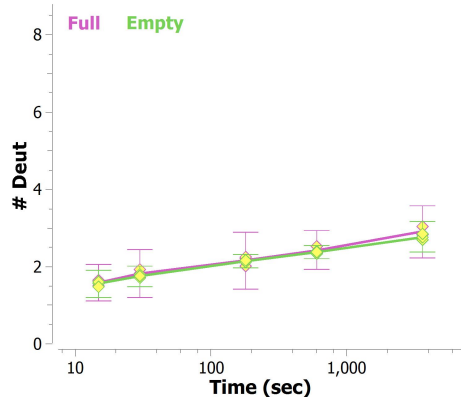

**AAV8\_VP1 499-503: NNSNF  
(#299)**

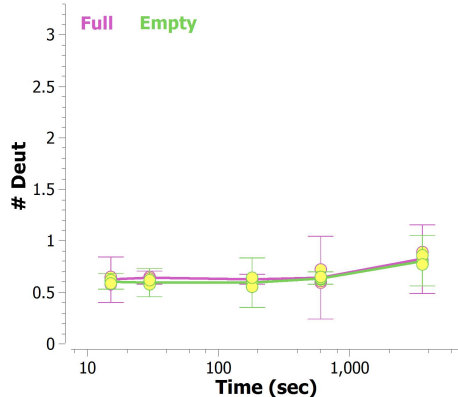

**AAV8\_VP1 503-525:  
FAWTAGTKYHLNGRNSLANPGIA  
(#300)**

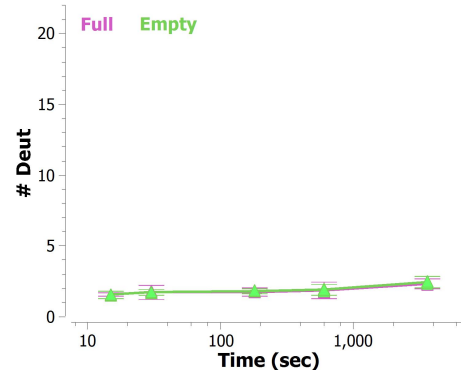

**AAV8\_VP1 504-511: AWTAGTKY  
(#301)**

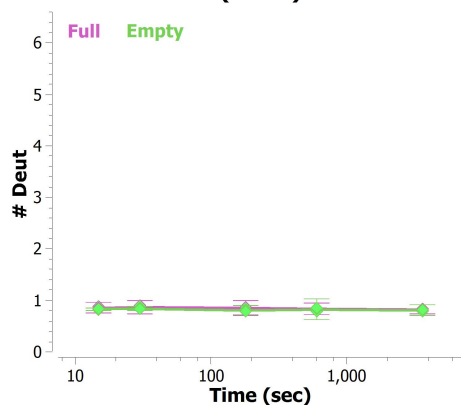

**AAV8\_VP1 504-513: AWTAGTKYHL  
(#302)**

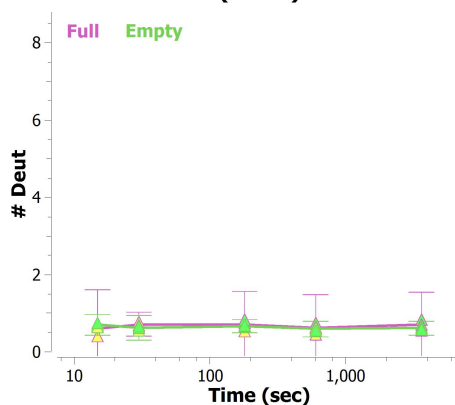

**AAV8\_VP1 504-517:  
AWTAGTKYHLNGRN (#303)**

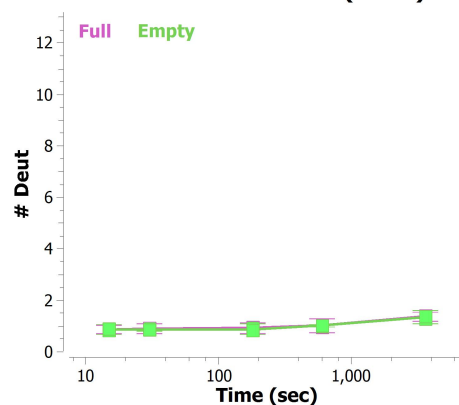

**AAV8\_VP1 504-525:  
AWTAGTKYHLNGRNSLANPGIA  
(#304)**

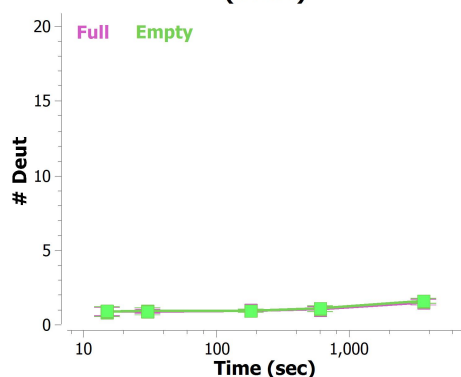

**AAV8\_VP1 504-526:  
AWTAGTKYHLNGRNSLANPGIAM  
(#305)**

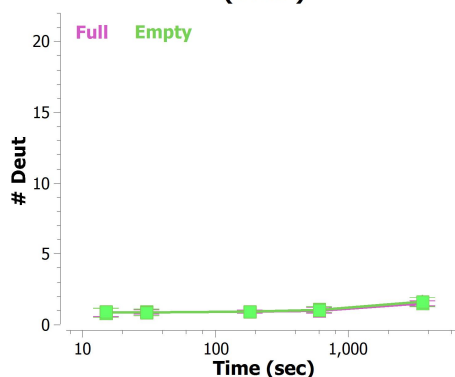

**AAV8\_VP1 504-533:  
TAGTKYHLNGRNSLANPGIAMATHKC  
(#306)**

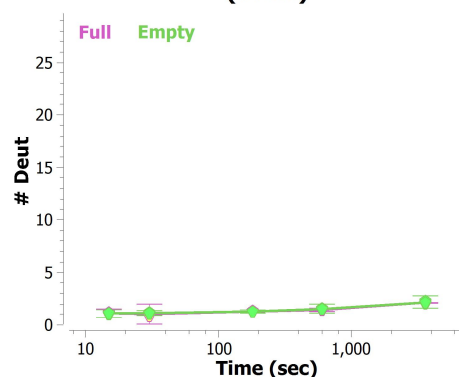

**AAV8\_VP1 504-534:  
TAGTKYHLNGRNSLANPGIAMATHKD  
(#307)**

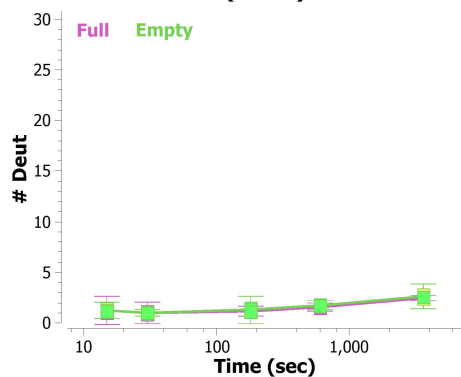

**AAV8\_VP1 504-543:  
(YHLNGRNSLANPGIAMATHKDDEERI  
(#308)**

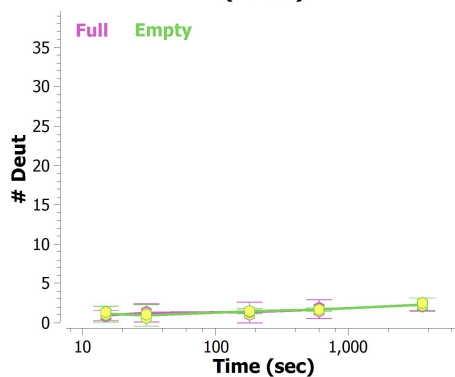

**AAV8\_VP1 505-517:  
WTAGTKYHLNGRN (#309)**

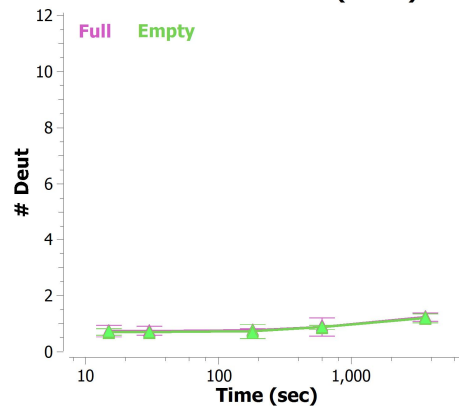

**AAV8\_VP1 505-525:  
WTAGTKYHLNGRNSLANPGIA  
(#310)**

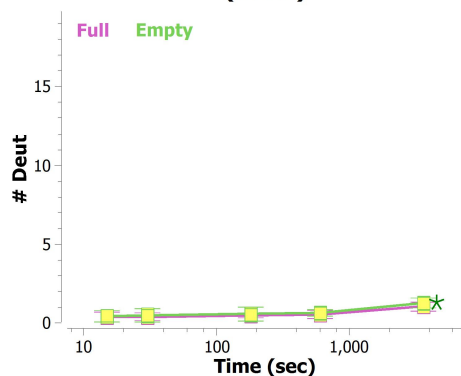

**AAV8\_VP1 505-526:  
WTAGTKYHLNGRNSLANPGIAM  
(#311)**

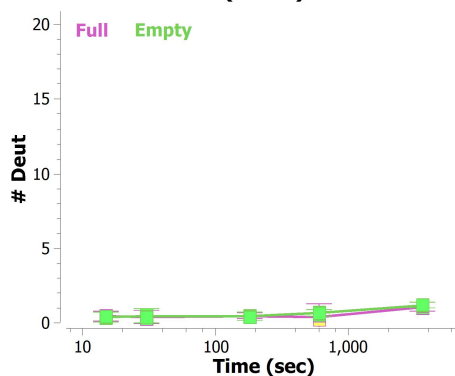

**AAV8\_VP1 507-517:  
AGTKYHLNGRN (#312)**

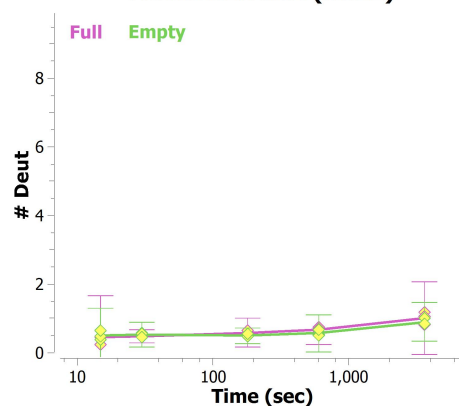



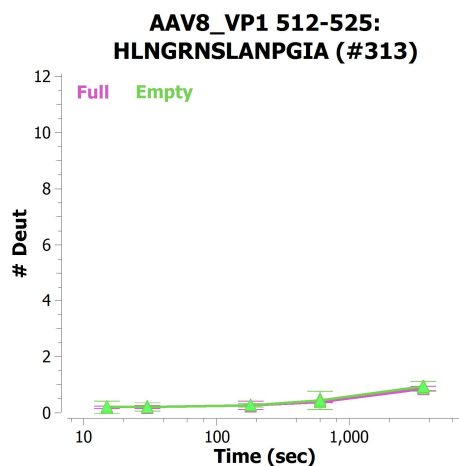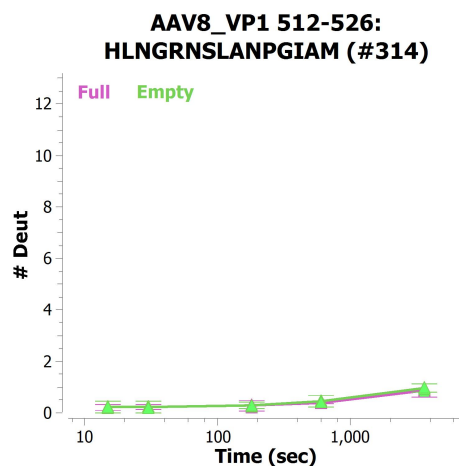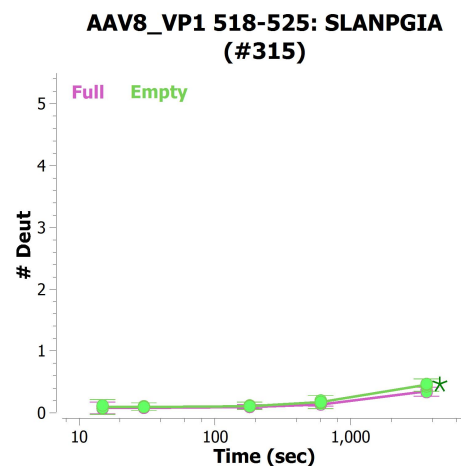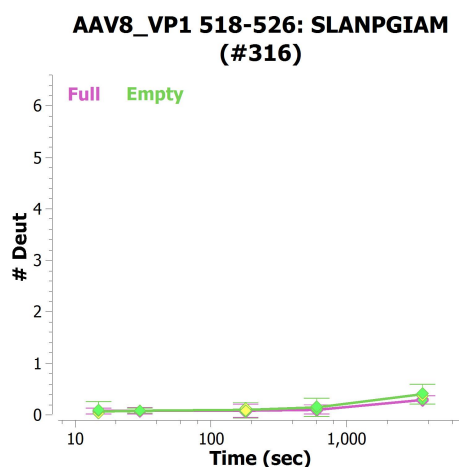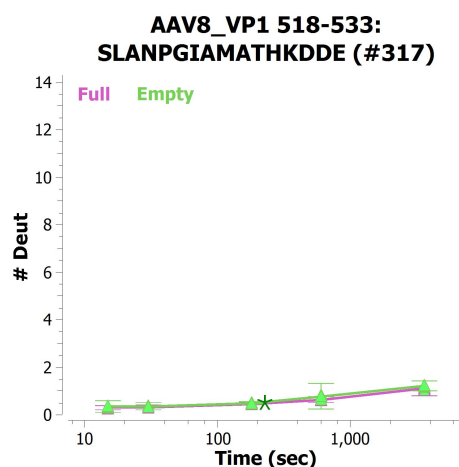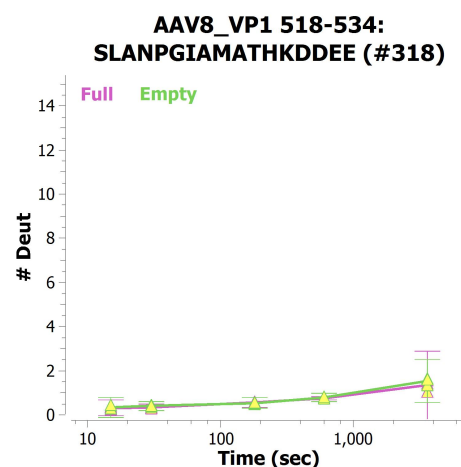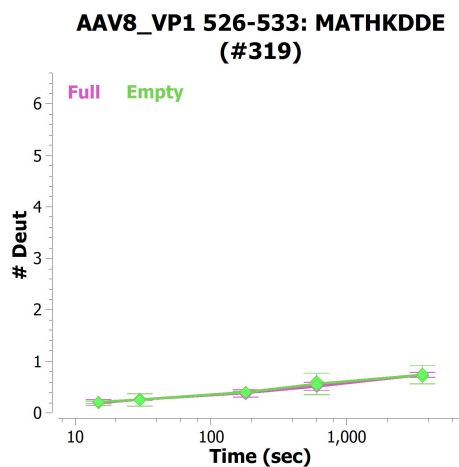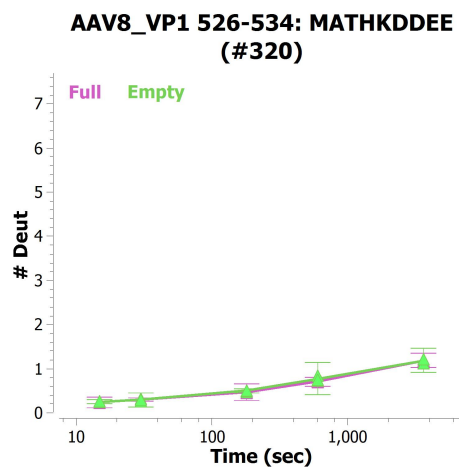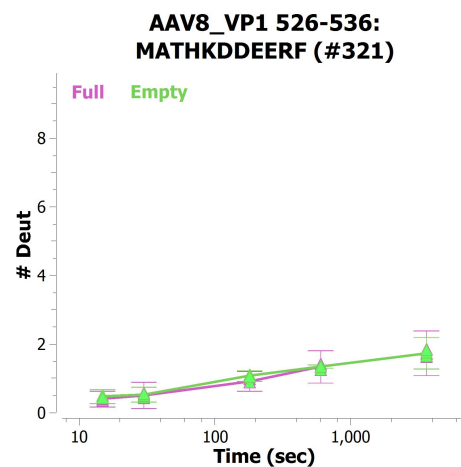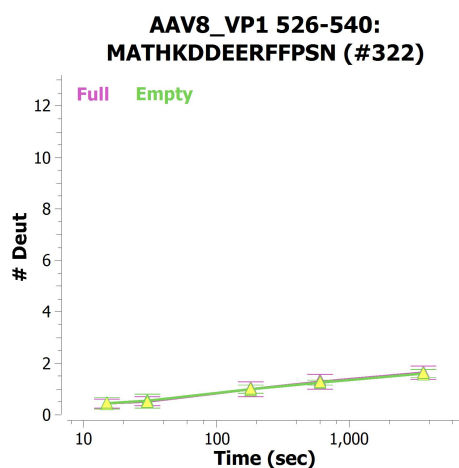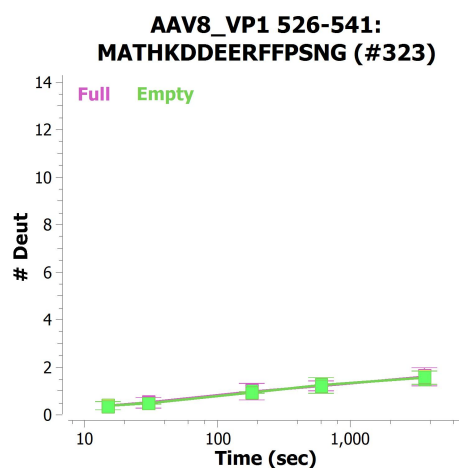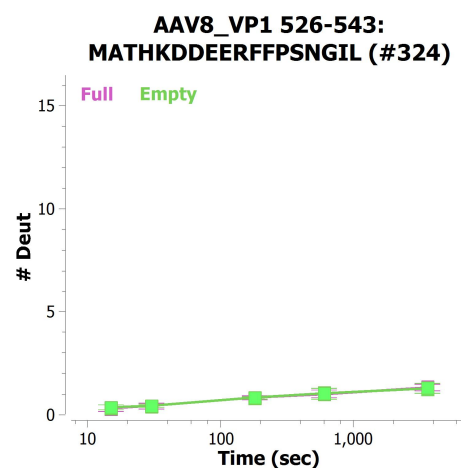

**AAV8\_VP1 526-544:  
MATHKDDEERFFPSNGILI (#325)**

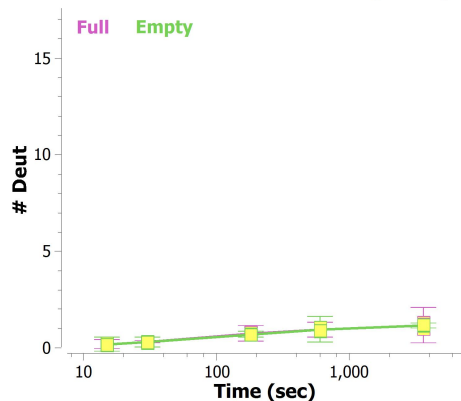

**AAV8\_VP1 526-545:  
MATHKDDEERFFPSNGILIF (#326)**

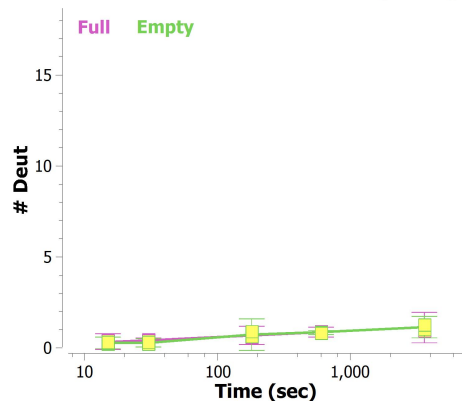

**AAV8\_VP1 526-556:  
THKDDEERFFPSNGILIFGKQNAARDN  
(#327)**

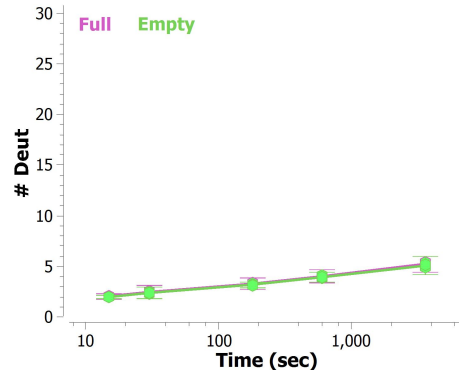

**AAV8\_VP1 527-540:  
ATHKDDEERFFPSN (#328)**

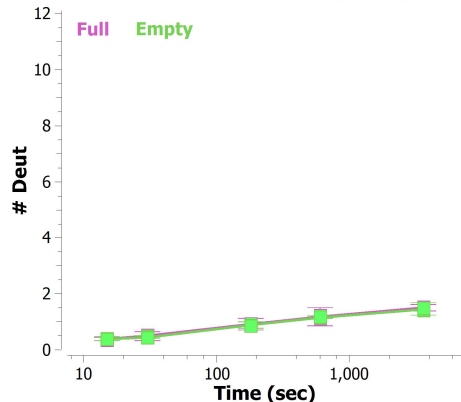

**AAV8\_VP1 527-541:  
ATHKDDEERFFPSNG (#329)**

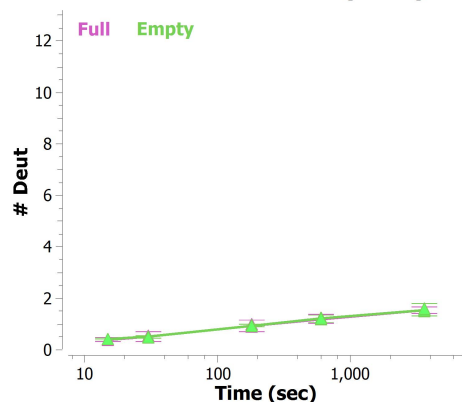

**AAV8\_VP1 527-543:  
ATHKDDEERFFPSNGIL (#330)**

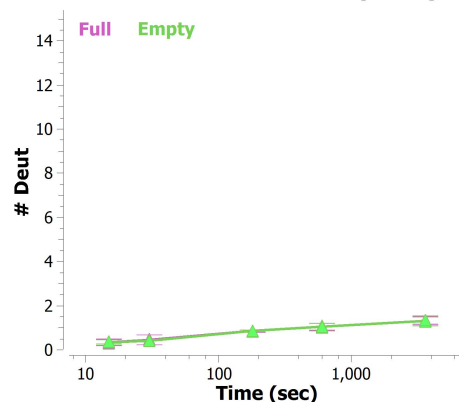

**AAV8\_VP1 527-556:  
HKDDEERFFPSNGILIFGKQNAARDN/  
(#331)**

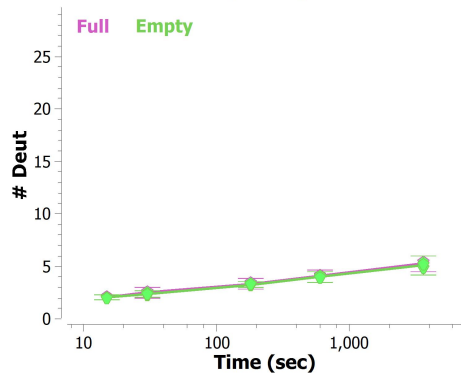

**AAV8\_VP1 529-543:  
HKDDEERFFPSNGIL (#332)**

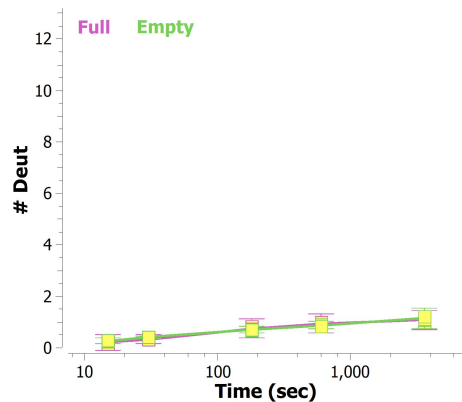

**AAV8\_VP1 534-540: ERFFPSN  
(#333)**

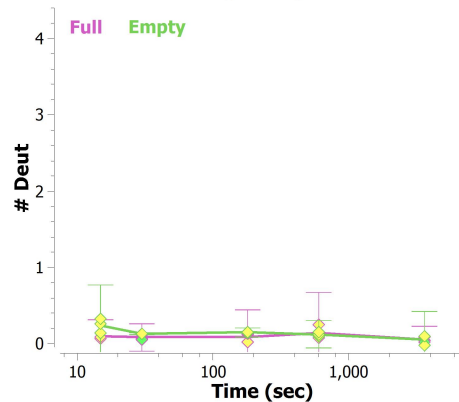

**AAV8\_VP1 534-541: ERFFPSNG  
(#334)**

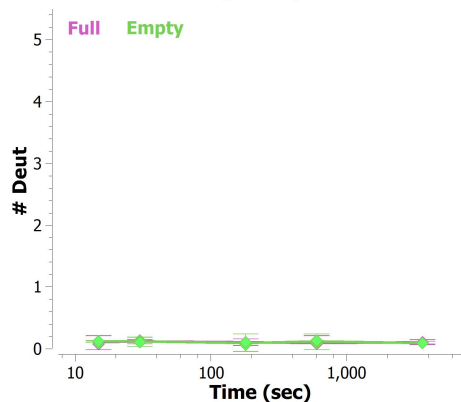

**AAV8\_VP1 534-543: ERFFPSNGIL  
(#335)**

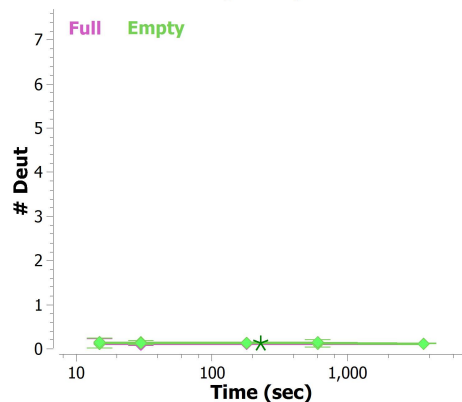

**AAV8\_VP1 534-544: ERFFPSNGILI  
(#336)**

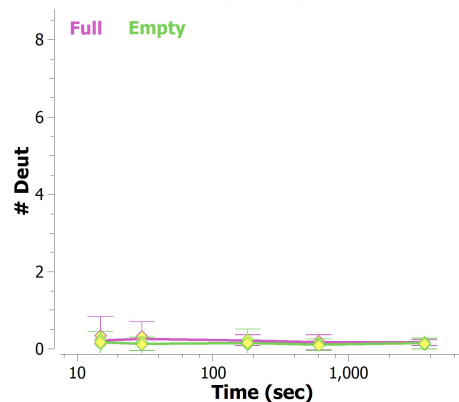

**AAV8\_VP1 534-556:  
ERFFPSNGILIFGKQNAARDNAD  
(#337)**

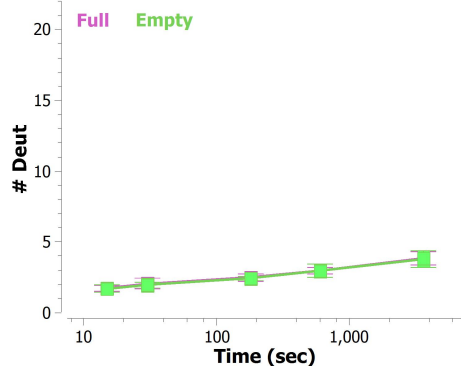

**AAV8\_VP1 535-541: RFFPSNG  
(#338)**

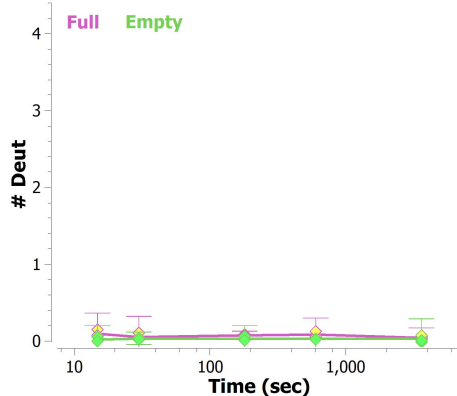

**AAV8\_VP1 535-543: RFFPSNGIL  
(#339)**

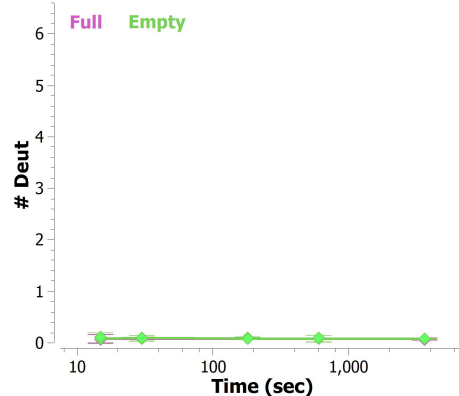

**AAV8\_VP1 535-556:  
RFFPSNGILIFGKQNAARDNAD  
(#340)**

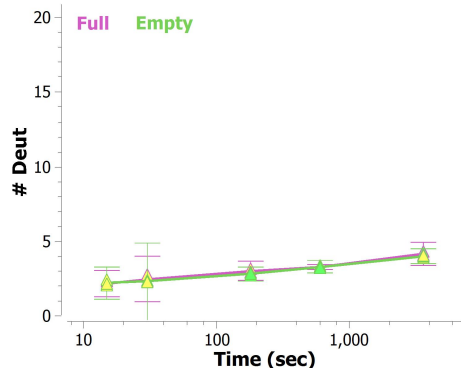

**AAV8\_VP1 537-543: FPSNGIL  
(#341)**

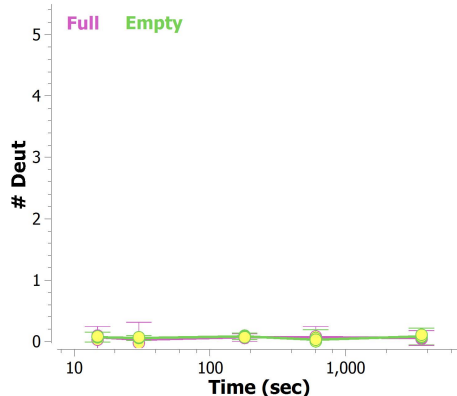

**AAV8\_VP1 537-556:  
FPSNGILIFGKQNAARDNAD  
(#342)**

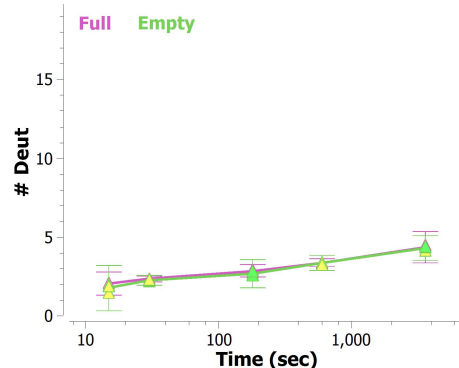

**AAV8\_VP1 538-543: PSNGIL  
(#343)**

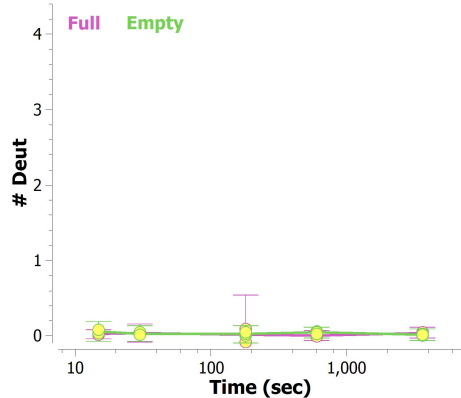

**AAV8\_VP1 541-556:  
GILIFGKQNAARDNAD (#344)**

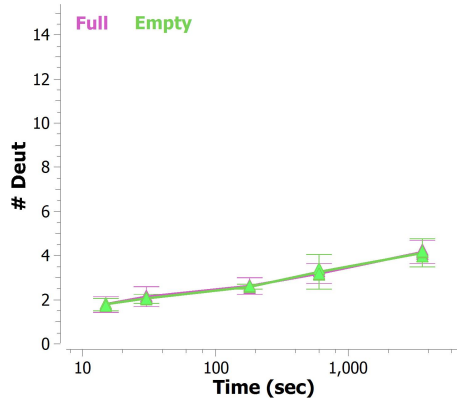

**AAV8\_VP1 541-559:  
GILIFGKQNAARDNADYSD (#345)**

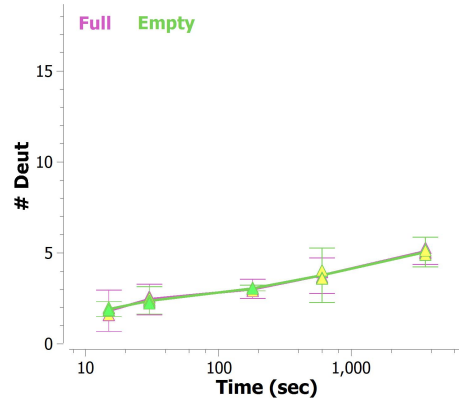

**AAV8\_VP1 542-556:  
ILIFGKQNAARDNAD (#346)**

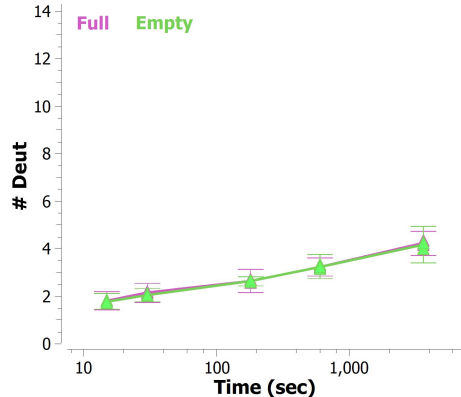

**AAV8\_VP1 542-559:  
ILIFGKQNAARDNADYSD (#347)**

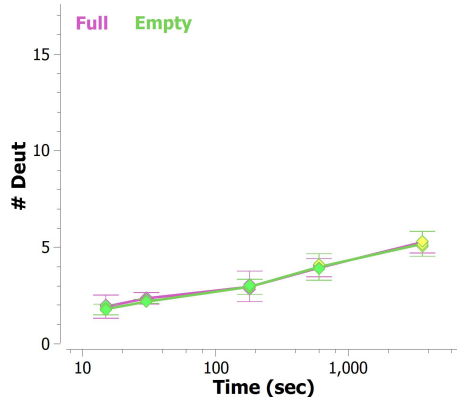

**AAV8\_VP1 544-548: IFGKQ  
(#348)**

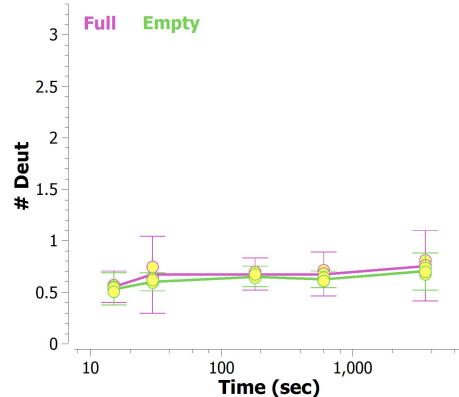

**AAV8\_VP1 544-550: IFGKQNA  
(#349)**

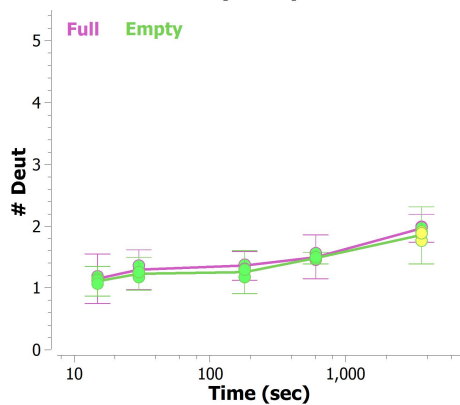

**AAV8\_VP1 544-552: IFGKQNAAR  
(#350)**

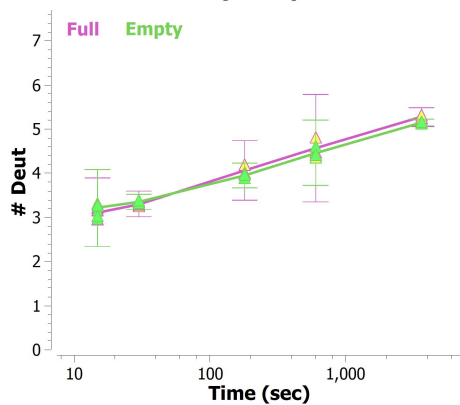

**AAV8\_VP1 544-553: IFGKQNAARD**  
**(#351)**

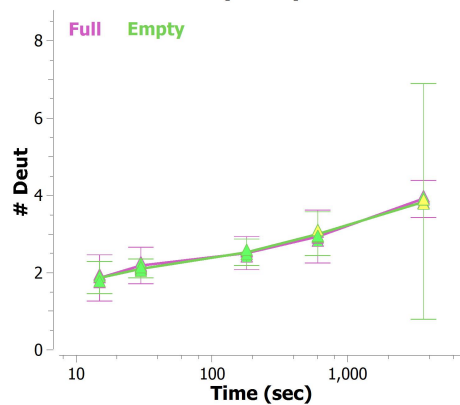

**AAV8\_VP1 544-556:  
IFGKQNAARDNAD (#352)**

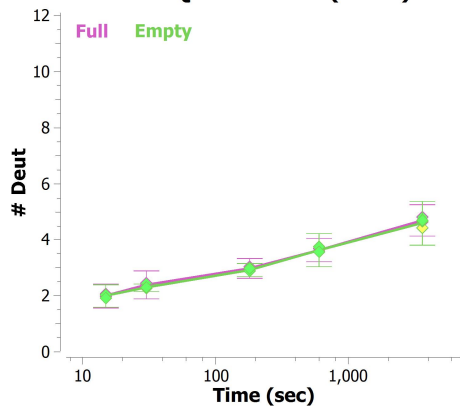

**AAV8\_VP1 544-558:  
IFGKQNAARDNADYS (#353)**

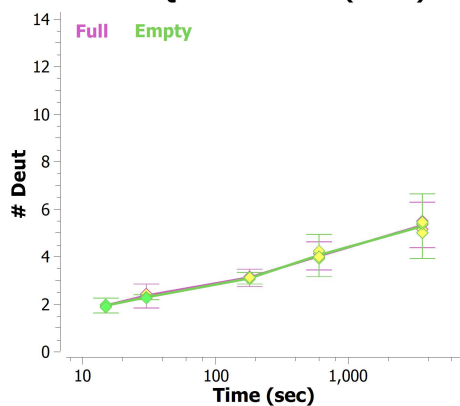

**AAV8\_VP1 544-559:  
IFGKQNAARDNADYSD (#354)**

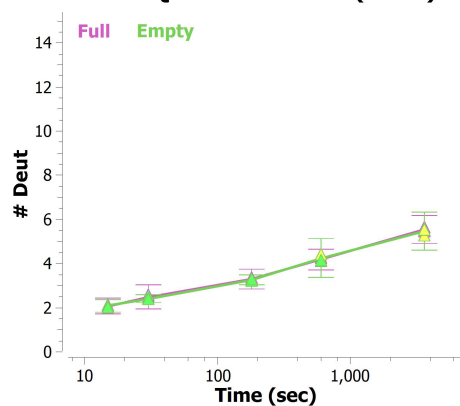

**AAV8\_VP1 544-561:  
IFGKQNAARDNADYSDVM (#355)**

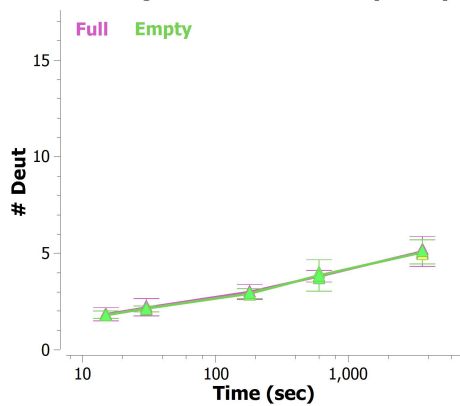

**AAV8\_VP1 544-562:**  
**IFGKQNAARDNADYSDVML (#356)**

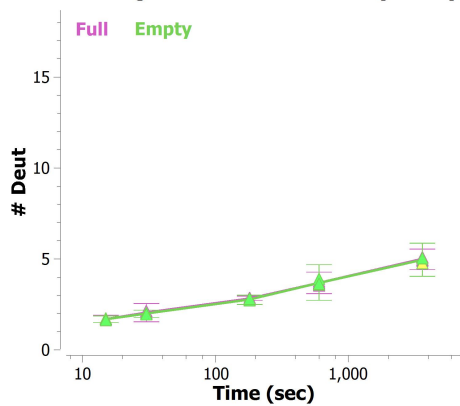

**AAV8\_VP1 545-556:  
FGKQNAARDNAD (#357)**

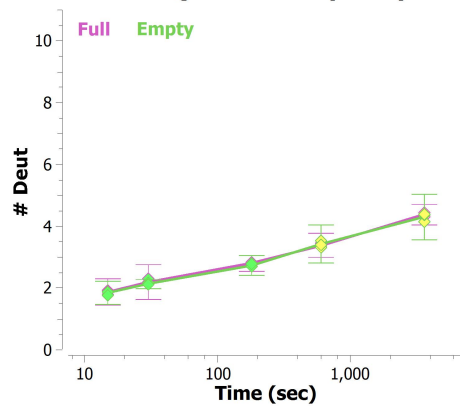

**AAV8\_VP1 546-556:  
GKQNAARDNAD (#358)**

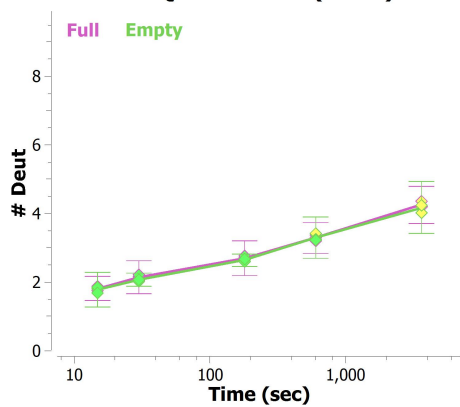

**AAV8\_VP1 546-559:  
GKQNAARDNADYSD (#359)**

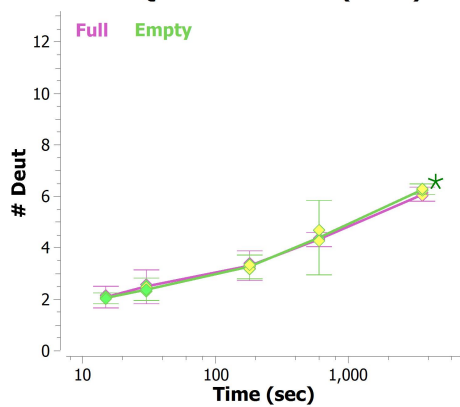

**AAV8\_VP1 554-559: NADYSD  
(#360)**

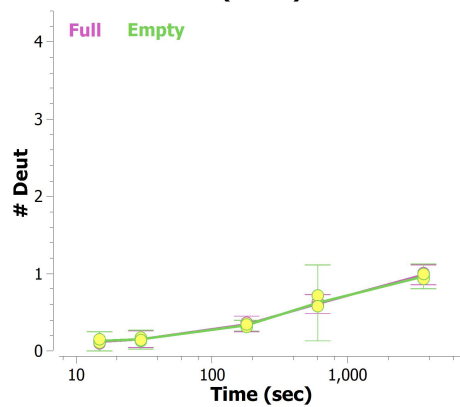

**AAV8\_VP1 557-560: YSDV (#361)**

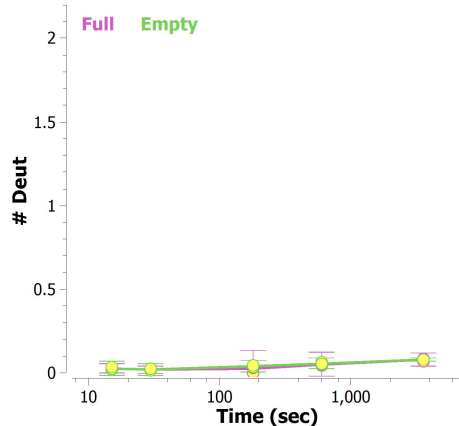

**AAV8\_VP1 557-561: YSDVM  
(#362)**

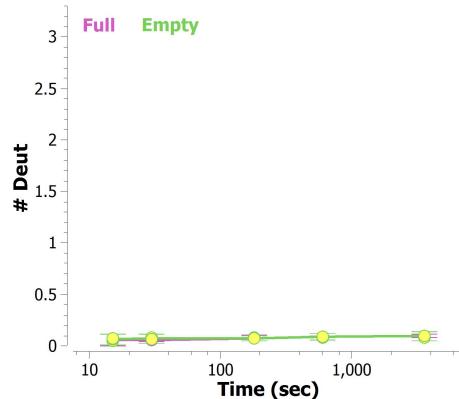

**AAV8\_VP1 557-565: YSDVMLTSE**  
**(#363)**

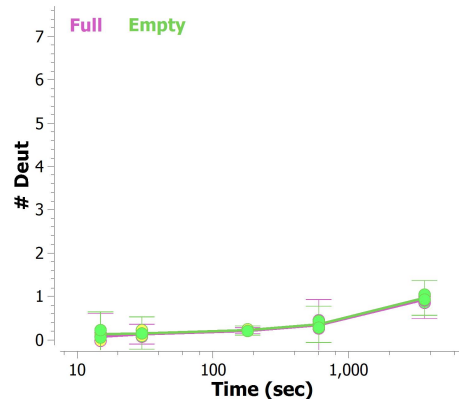

**AAV8\_VP1 559-565: DVMLTSE  
(#364)**

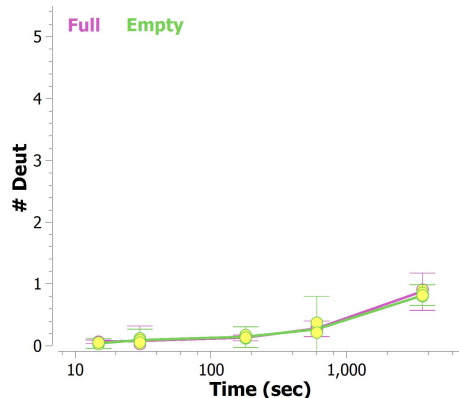

**AAV8\_VP1 560-565: VMLTSE  
(#365)**

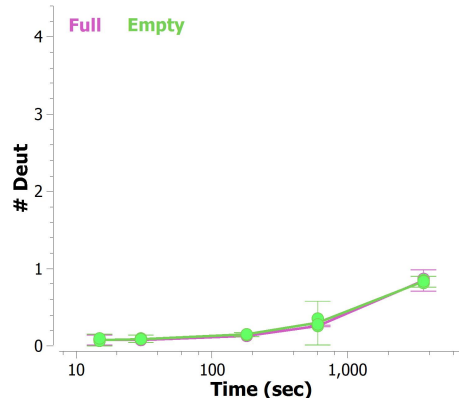

**AAV8\_VP1 560-566: VMLTSEE**  
**(#366)**

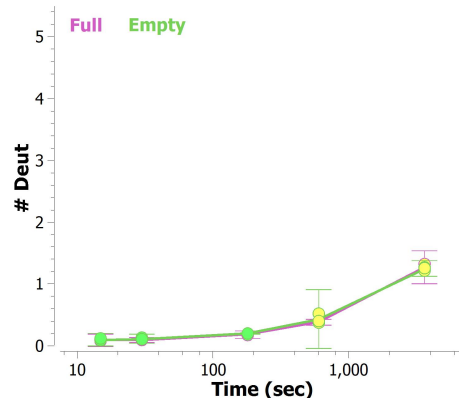

**AAV8\_VP1 560-567: VMLTSEEE**  
**(#367)**

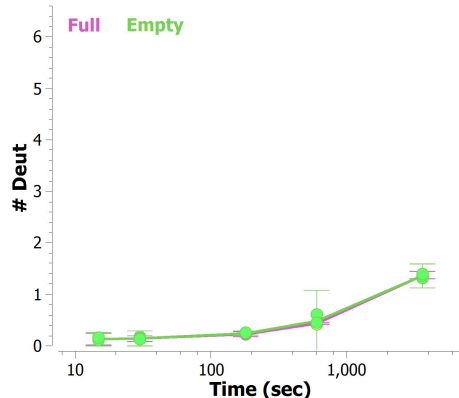

**AAV8\_VP1 560-576:  
VMLTSEEEIKTTNPVAT (#368)**

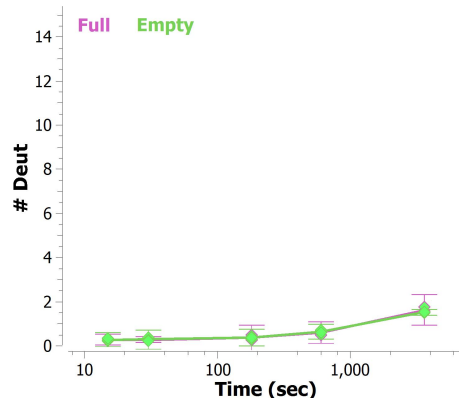

**AAV8\_VP1 560-578:  
VMLTSEEEIKTTNPVATEE (#369)**

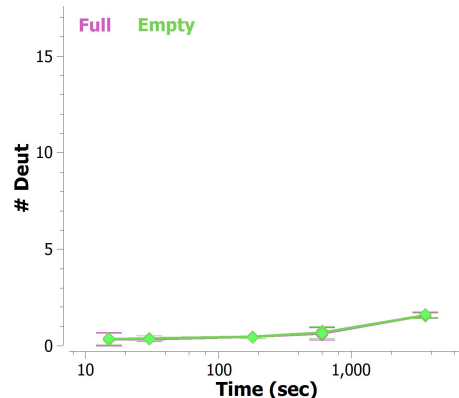

**AAV8\_VP1 561-565: MLTSE  
(#370)**

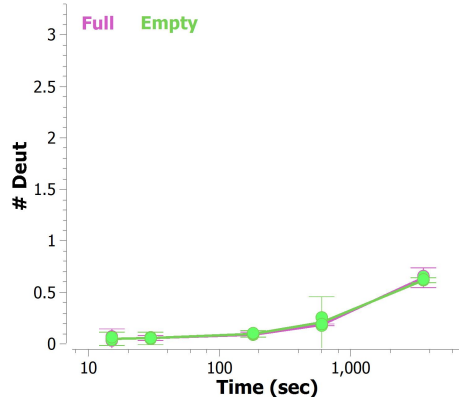

**AAV8\_VP1 561-567: MLTSEEE  
(#371)**

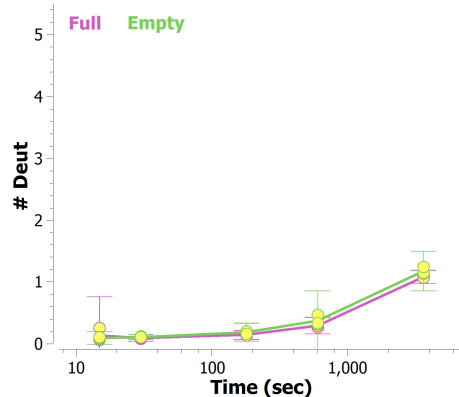

**AAV8\_VP1 561-578:  
MLTSEEEIKTTNPVATEE (#372)**

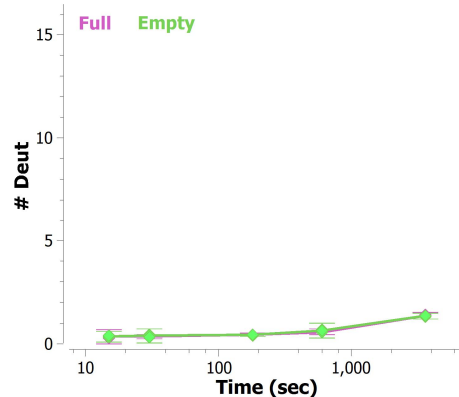

**AAV8\_VP1 562-566: LTSEE**  
**(#373)**

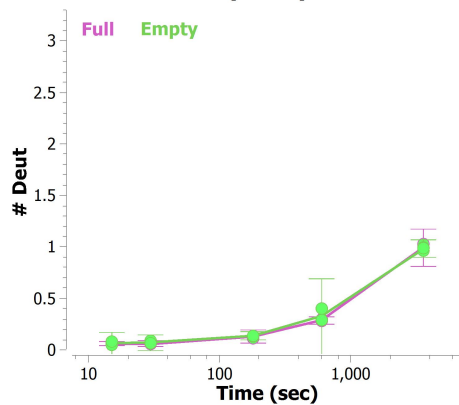

**AAV8\_VP1 562-567: LTSEEE  
(#374)**

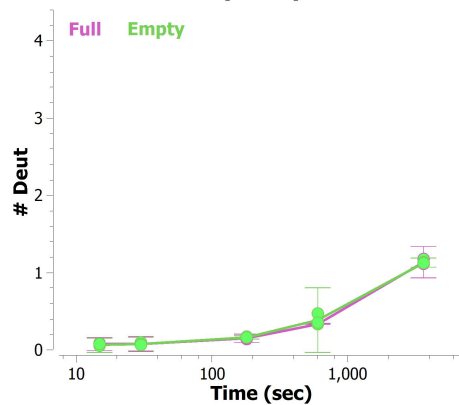

**AAV8\_VP1 562-575:  
LTSEEEIKTTNPVA (#375)**

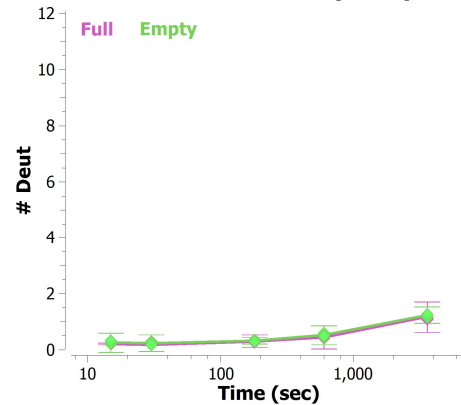

**AAV8\_VP1 562-576:  
LTSEEEIKTTNPVAT (#376)**

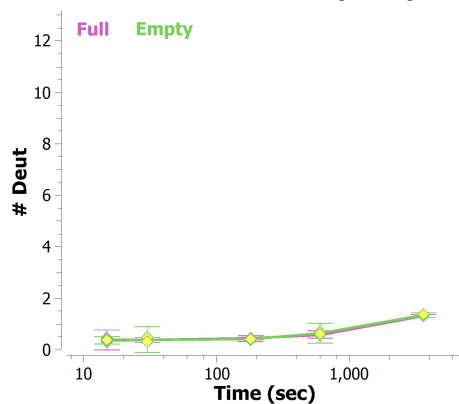

**AAV8\_VP1 562-578:  
LTSEEEIKTTNPVATEE (#377)**

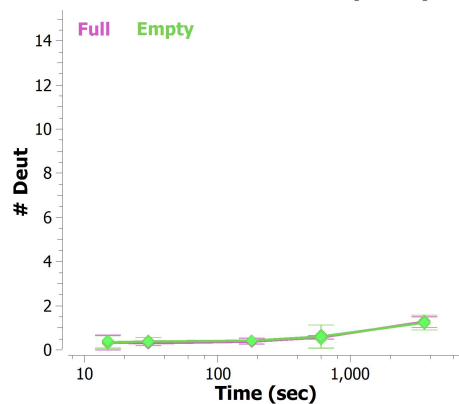

**AAV8\_VP1 563-575:  
TSEEEIKTTNPVA (#378)**

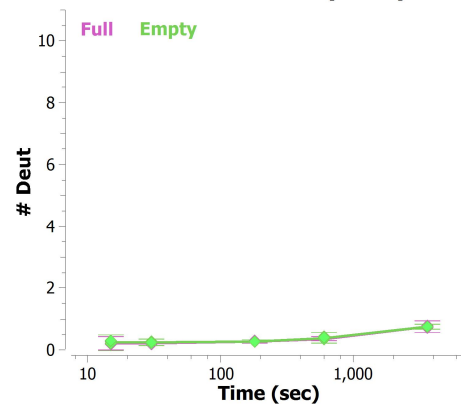

**AAV8\_VP1 563-576:  
TSEEEIKTTNPVAT (#379)**

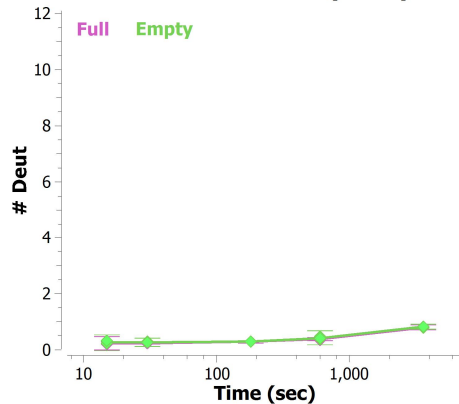

**AAV8\_VP1 563-578:  
TSEEEIKTTNPVATEE (#380)**

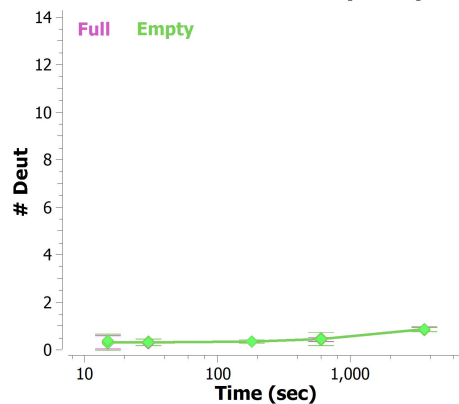

**AAV8\_VP1 563-586:  
TSEEEIKTTNPVATEEYGIVADNL  
(#381)**

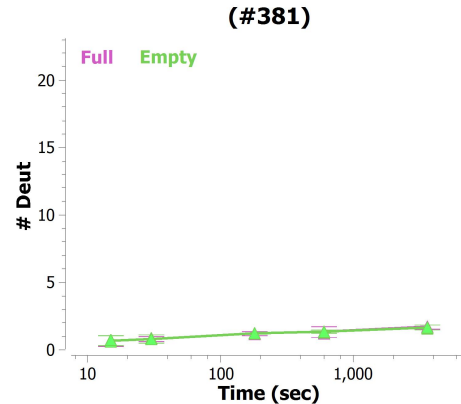

**AAV8\_VP1 563-587:  
TSEEEIKTTNPVATEEYGIVADNLQ  
(#382)**

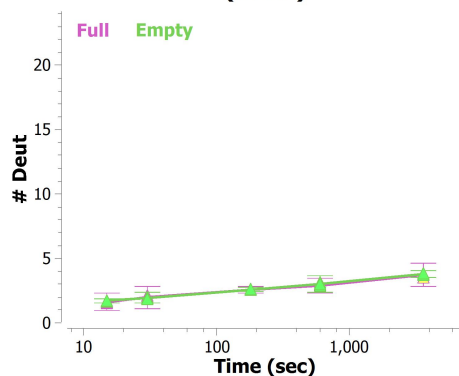

**AAV8\_VP1 566-576: EEIKTTNPVAT  
(#383)**

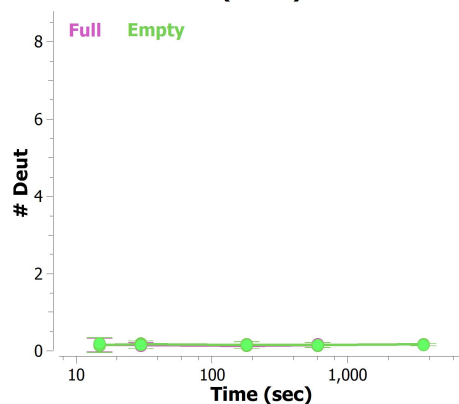

**AAV8\_VP1 566-578:  
EEIKTTNPVATEE (#384)**

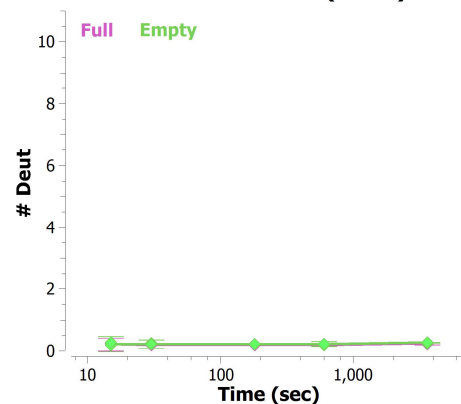

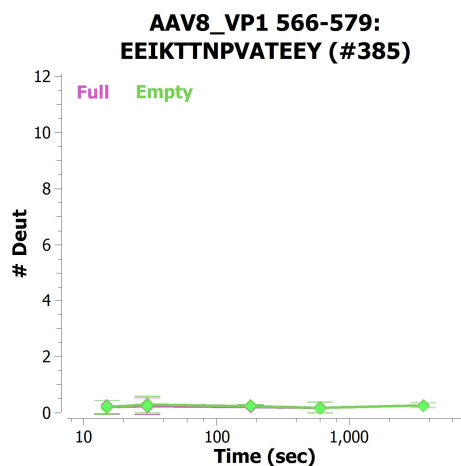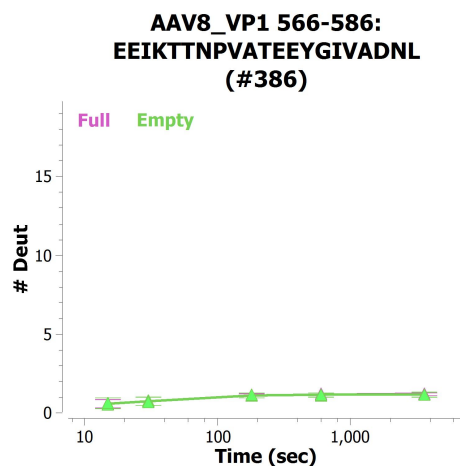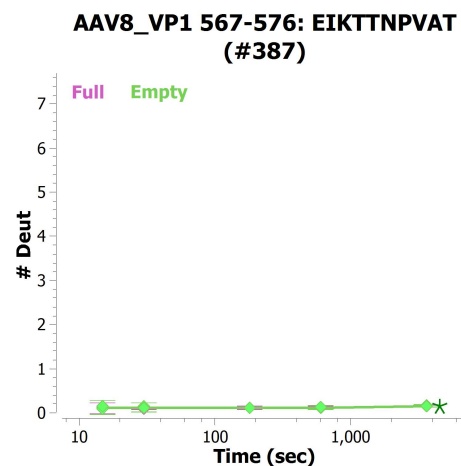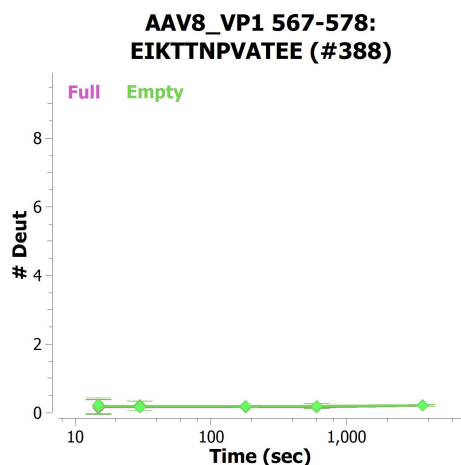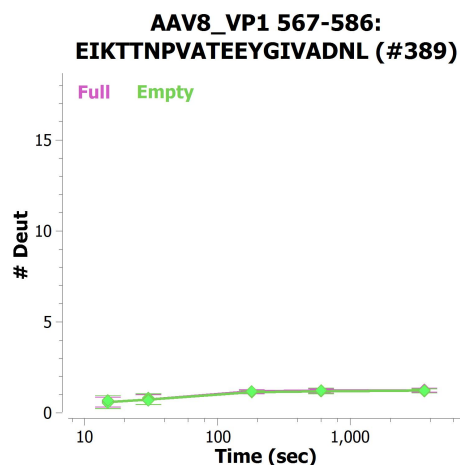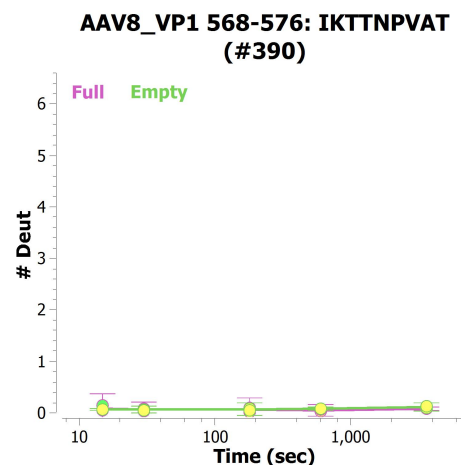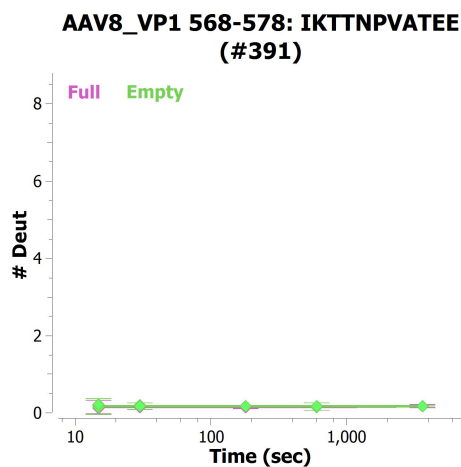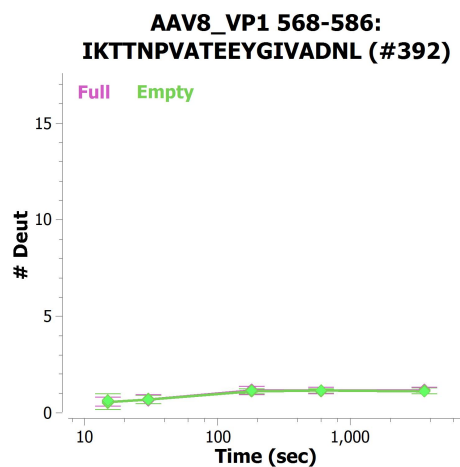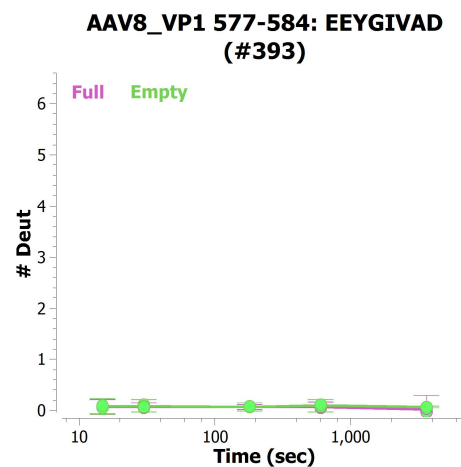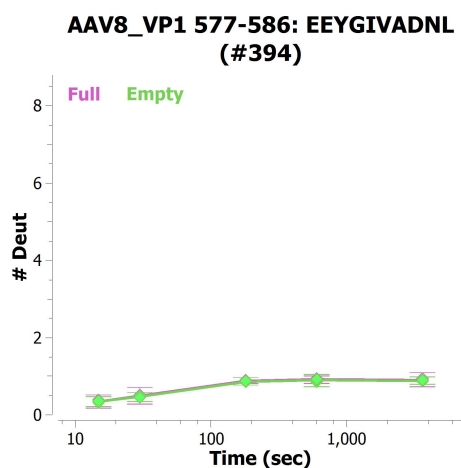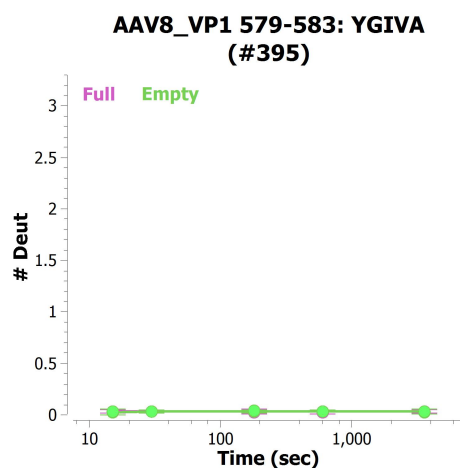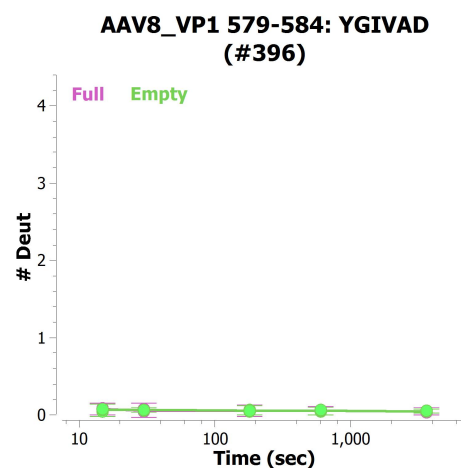



**AAV8\_VP1 579-585: YGIVADN  
(#397)**

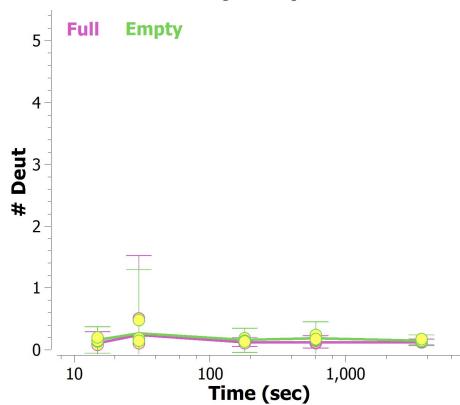

**AAV8\_VP1 579-586: YGIVADNI**  
**(#398)**

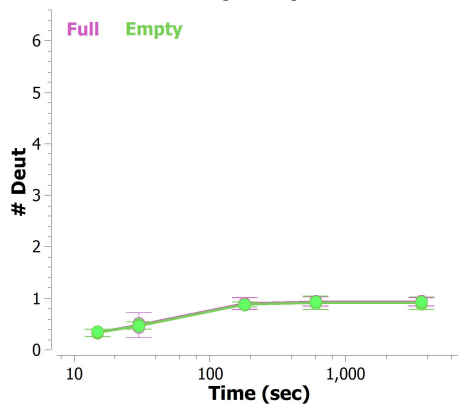

**AAV8\_VP1 579-587: YGIVADNI**  
**(#399)**

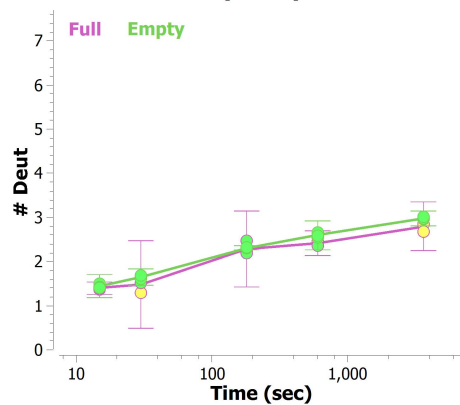

**AAV8\_VP1 580-586: GIVADNL  
(#400)**

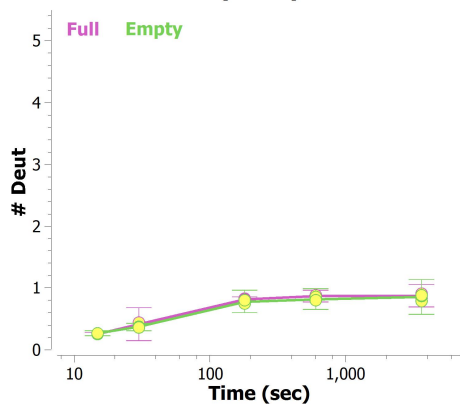

**AAV8\_VP1 581-586: IVADNL  
(#401)**

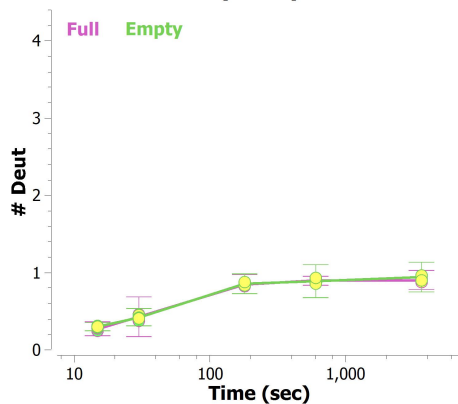

**AAV8\_VP1 587-613:**  
**QQNTAPQIGTVNSQGALPGMVW**  
**(#402)**

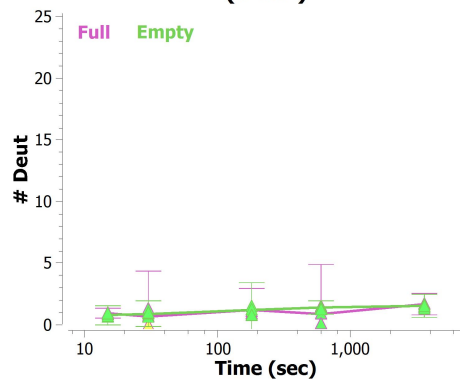

**AAV8\_VP1 587-621:**  
**APQIGTVNSQGALPGMVWQNRDV**  
**(#403)**

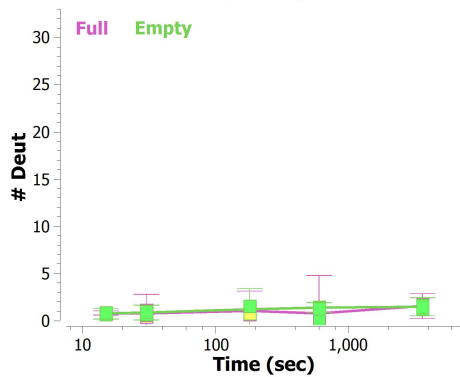

**AAV8\_VP1 608-613: VWQNRD  
(#404)**

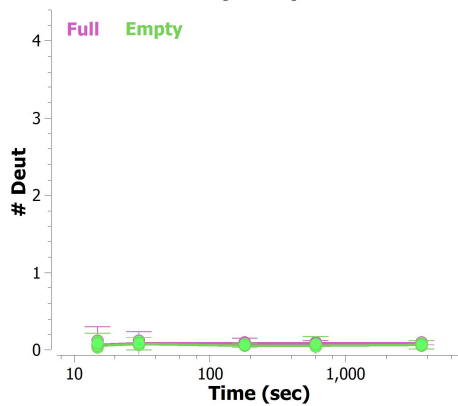

**AAV8\_VP1 608-616: VWQNRDV**  
**(#405)**

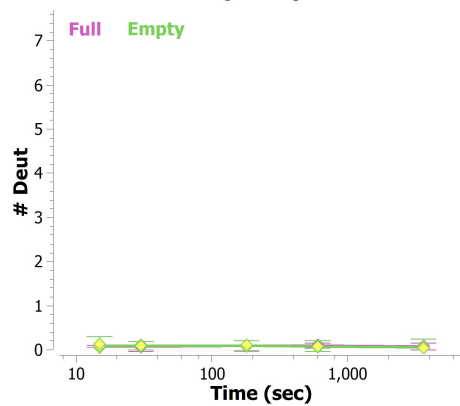

**AAV8\_VP1 610-621:  
QNRDVYLQGPIW (#406)**

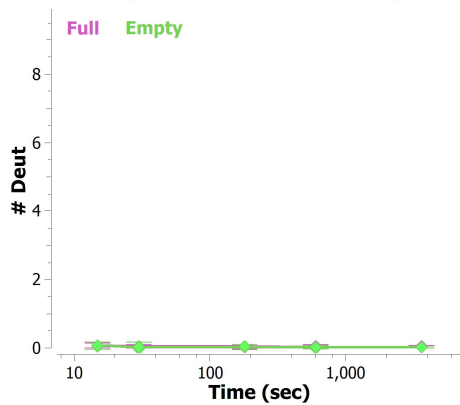

**AAV8\_VP1 611-621:  
NRDVYLQGPIW (#407)**

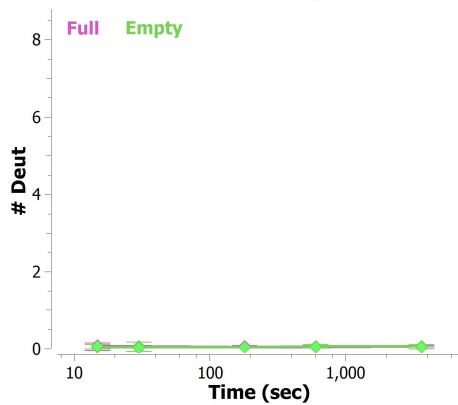

**AAV8\_VP1 614-621: VYLQGPI**  
**(#408)**

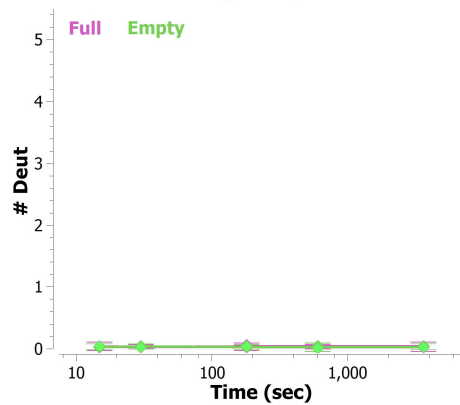

**AAV8\_VP1 616-621: LQGPIW (#409)**

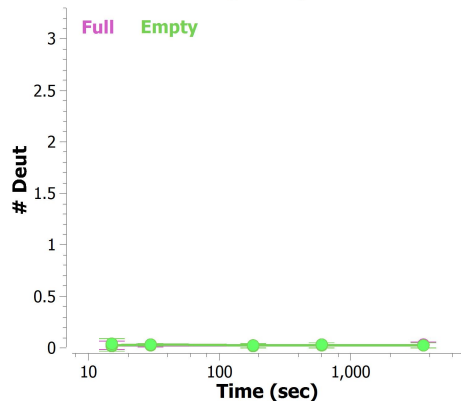

**AAV8\_VP1 622-631: AKIPHTDGNF (#410)**

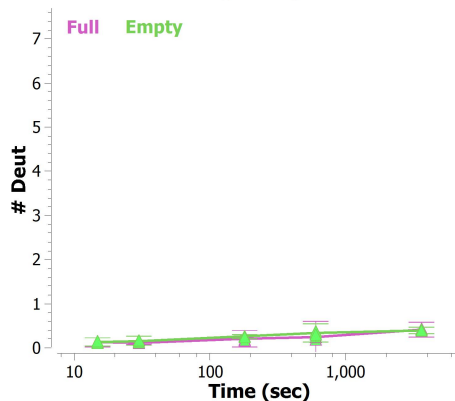

**AAV8\_VP1 622-637: AKIPHTDGNFHPSPLM (#411)**

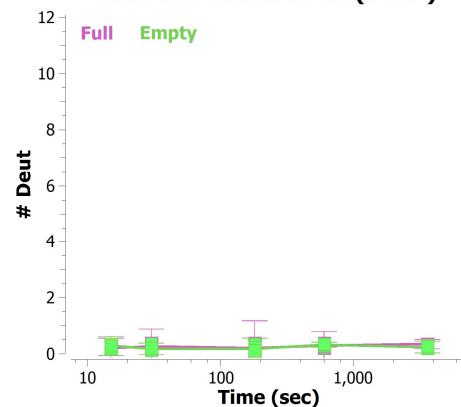

**AAV8\_VP1 622-639: AKIPHTDGNFHPSPLMGG (#412)**

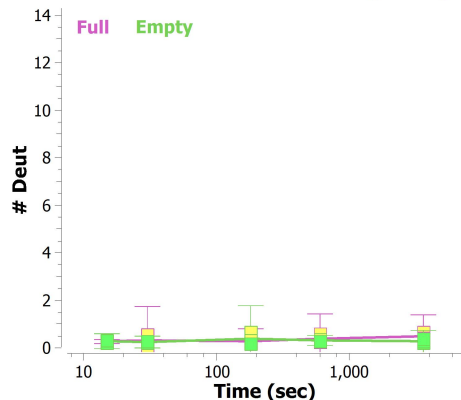

**AAV8\_VP1 622-640: AKIPHTDGNFHPSPLMGGF (#413)**

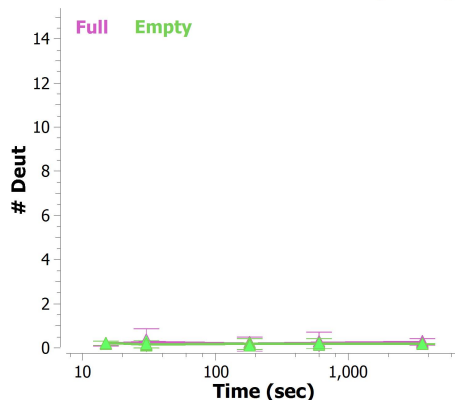

**AAV8\_VP1 638-650: GGFG LKHPPPQIL (#414)**

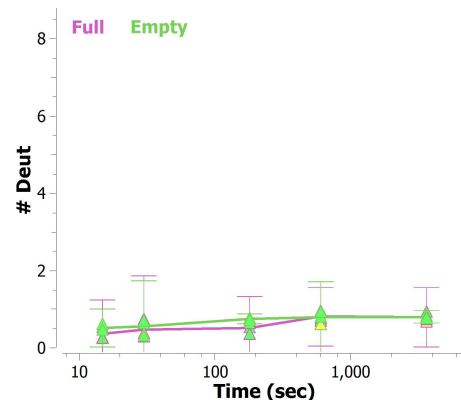

**AAV8\_VP1 640-650: FGLKHPPPQIL (#415)**

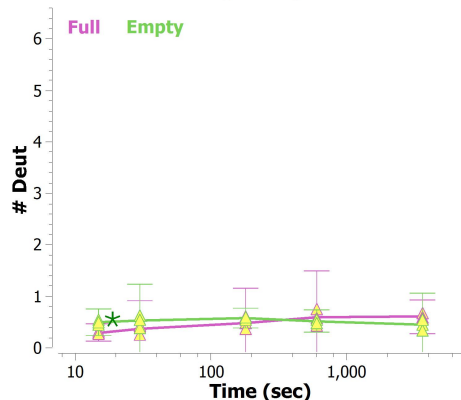

**AAV8\_VP1 641-650: GLKHPPPQIL (#416)**

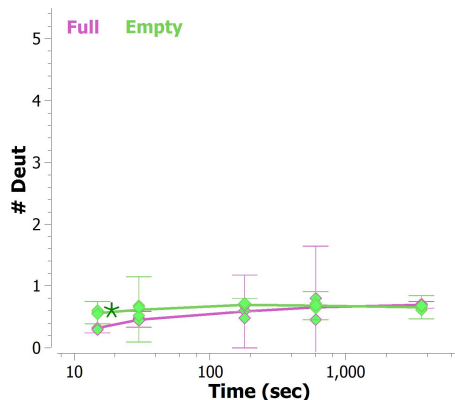

**AAV8\_VP1 642-650: LKHPPPQIL (#417)**

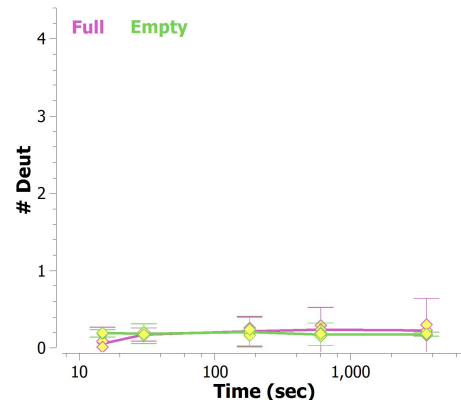

**AAV8\_VP1 650-669: LIKNTVPADPPTTFNQSKL (#418)**

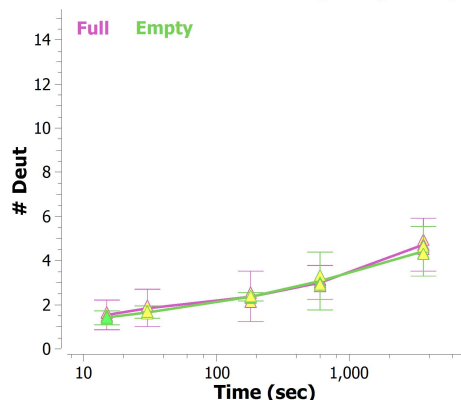

**AAV8\_VP1 650-671: LIKNTVPADPPTTFNQSKLNS (#419)**

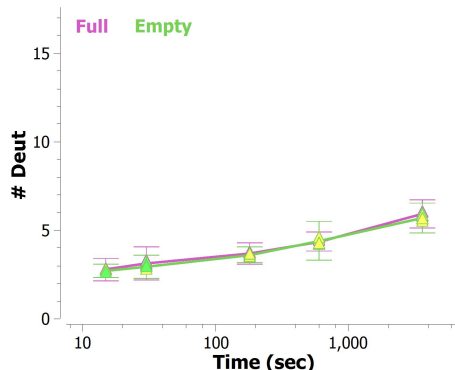

**AAV8\_VP1 651-663: IKNTVPADPPTT (#420)**

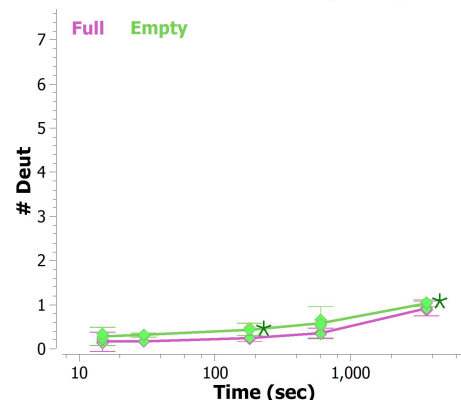

**AAV8\_VP1 651-664:  
IKNTPVPADPPTTF (#421)**

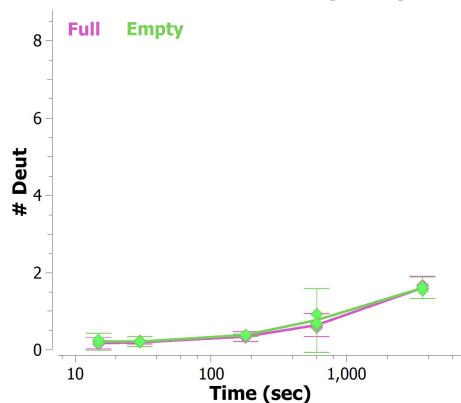

**AAV8\_VP1 651-665:  
IKNTPVPADPPTTFN (#422)**

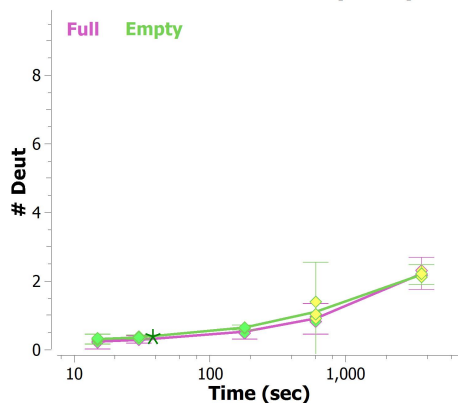

**AAV8\_VP1 651-666:  
IKNTPVPADPPTTFNQ (#423)**

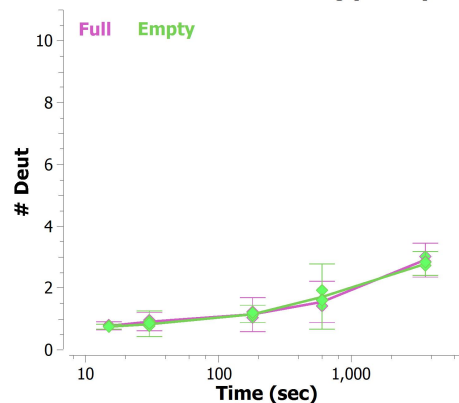

**AAV8\_VP1 651-669:  
IKNTPVPADPPTTFNQSKL (#424)**

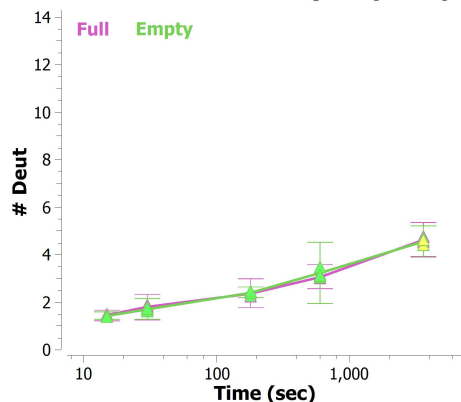

**AAV8\_VP1 651-671:  
IKNTPVPADPPTTFNQSKLNS (#425)**

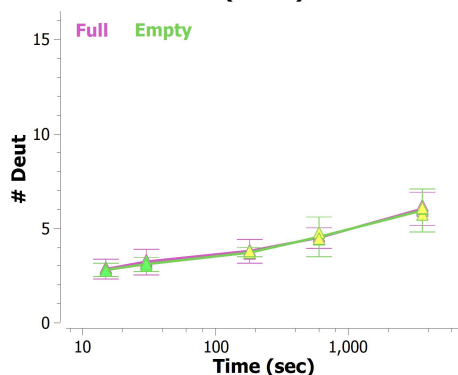

**AAV8\_VP1 651-672:  
IKNTPVPADPPTTFNQSKLNSF (#426)**

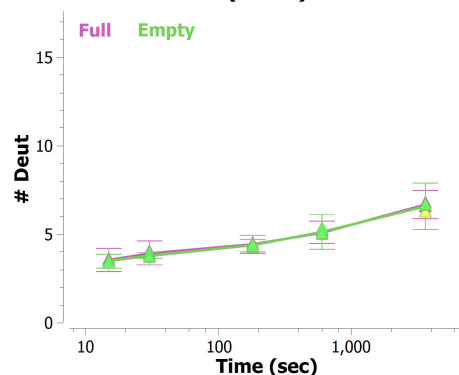

**AAV8\_VP1 665-669: NQSKL (#427)**

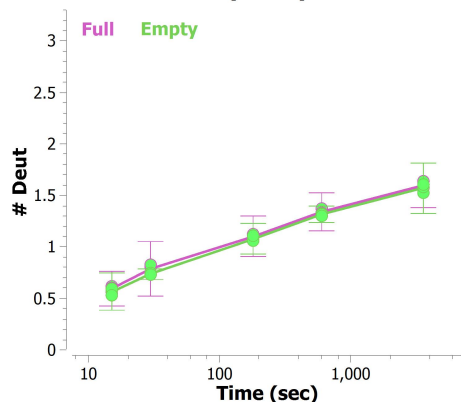

**AAV8\_VP1 665-671: NQSKLNS (#428)**

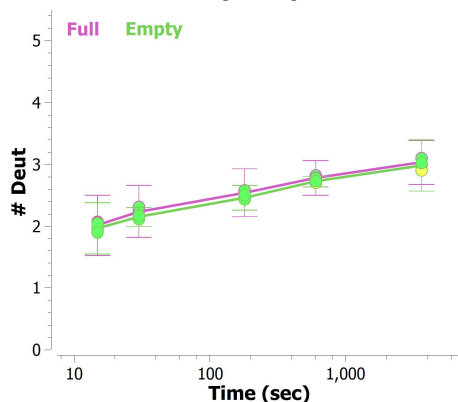

**AAV8\_VP1 665-672: NQSKLNSF (#429)**

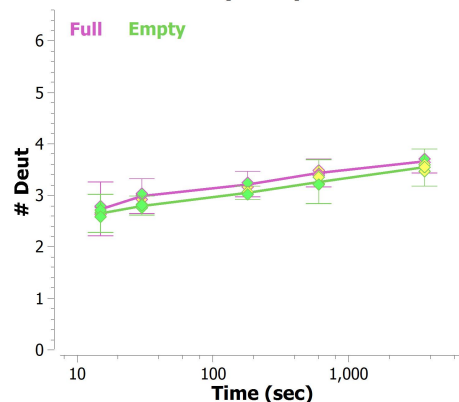

**AAV8\_VP1 665-684:  
NQSKLNSFITQYSTGQVSVE (#430)**

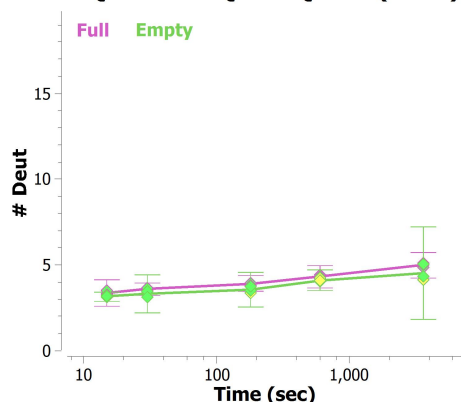

**AAV8\_VP1 670-675: NSFITQ (#431)**

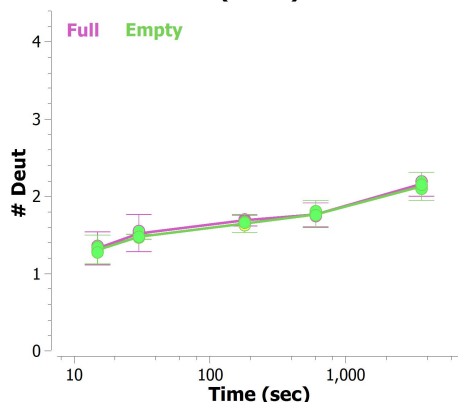

**AAV8\_VP1 670-683:  
NSFITQYSTGQVSV (#432)**

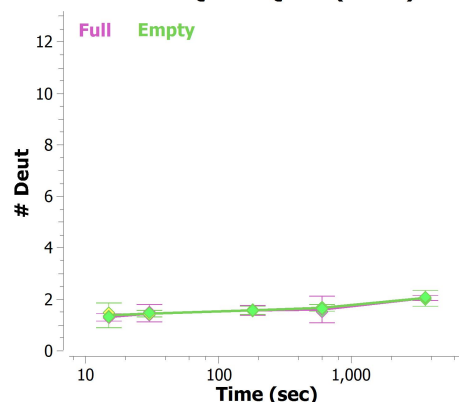

**AAV8\_VP1 672-675: FITQ (#433)**

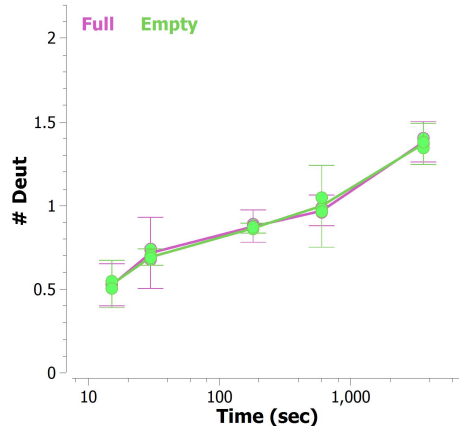

**AAV8\_VP1 672-676: FITQY  
(#434)**

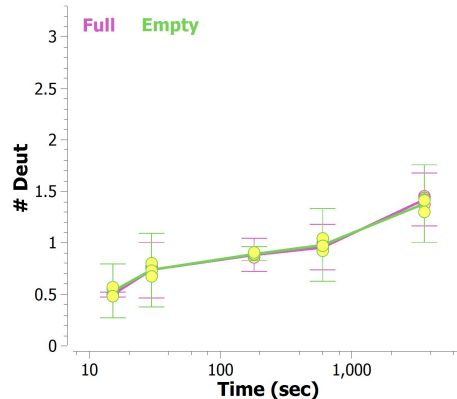

**AAV8\_VP1 672-682: FITQYSTGQVS**  
**(#435)**

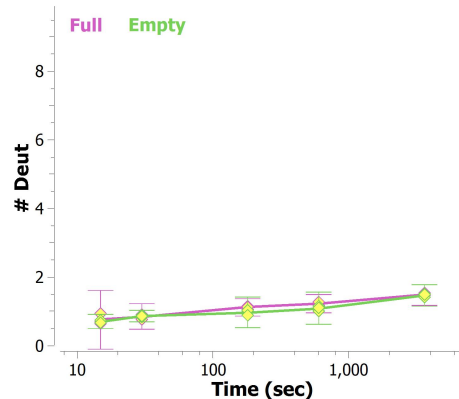

**AAV8\_VP1 672-683:  
FITQYSTGQVSV (#436)**

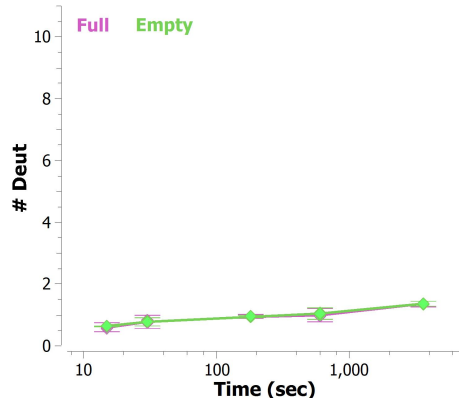

**AAV8\_VP1 672-684:  
FITQYSTGQVSVE (#437)**

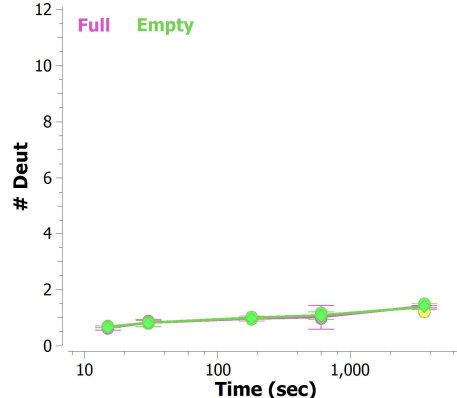

**AAV8\_VP1 673-676: ITQY (#438)**

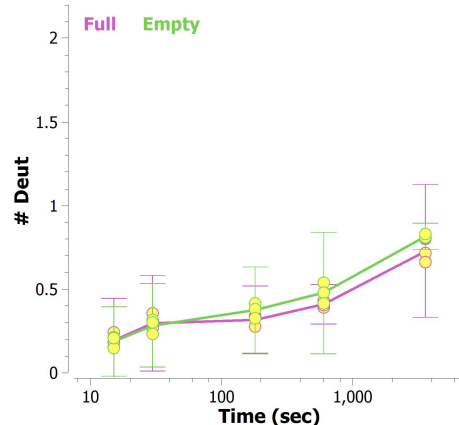

**AAV8\_VP1 673-683:  
ITQYSTGQVSV (#439)**

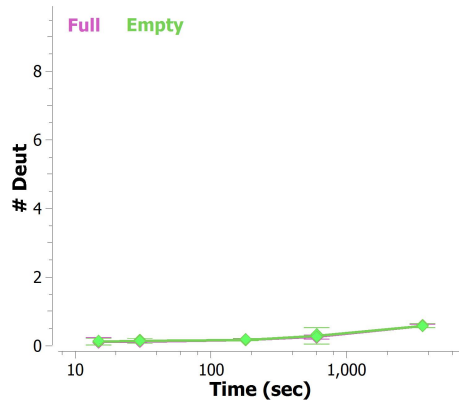

**AAV8\_VP1 673-684:  
ITQYSTGQVSVE (#440)**

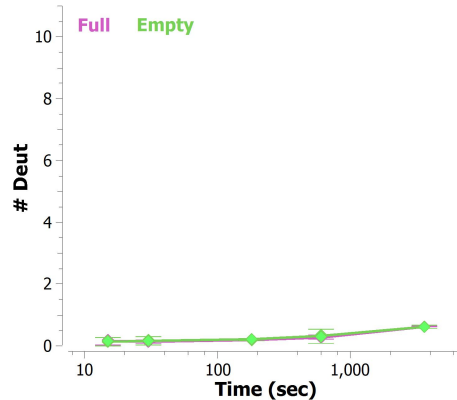

**AAV8\_VP1 676-683: YSTGQVSV  
(#441)**

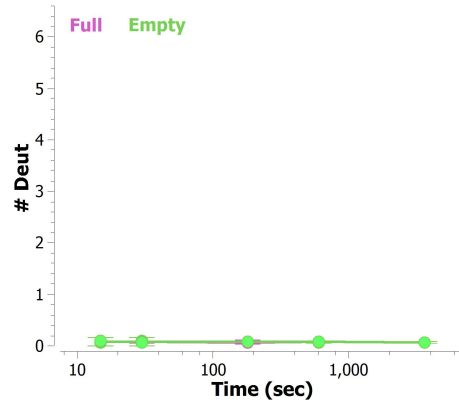

**AAV8\_VP1 676-684: YSTGQVSVE**  
**(#442)**

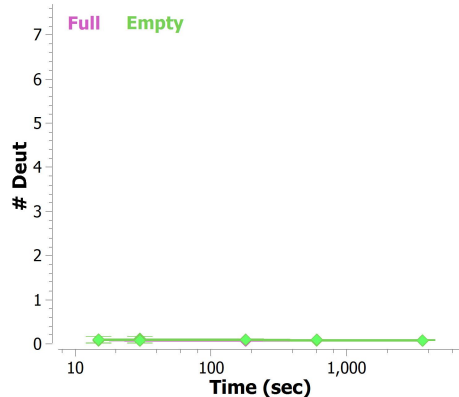

**AAV8\_VP1 677-684: STGQVSVE  
(#443)**

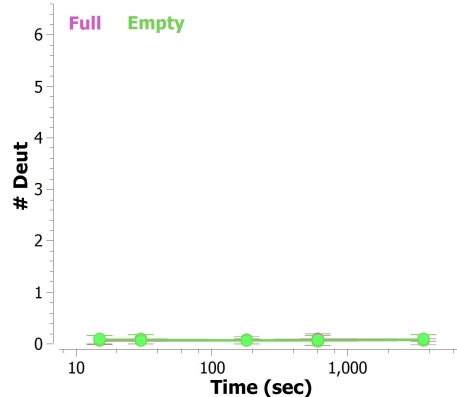

**AAV8\_VP1 683-689: VEIEWEL  
(#444)**

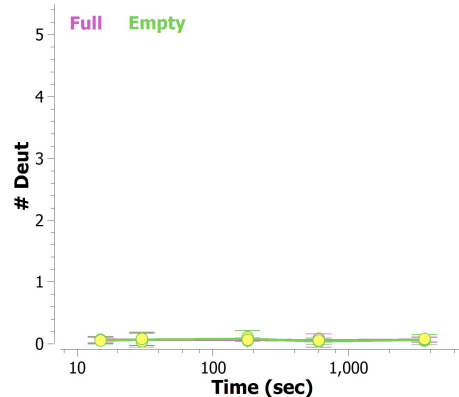

**AAV8\_VP1 683-703:  
VEIEWELQKENS KRWNPEIQY  
(#445)**

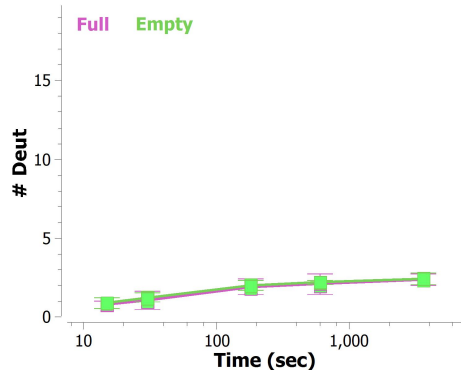

**AAV8\_VP1 684-689: EIEWEL  
(#446)**

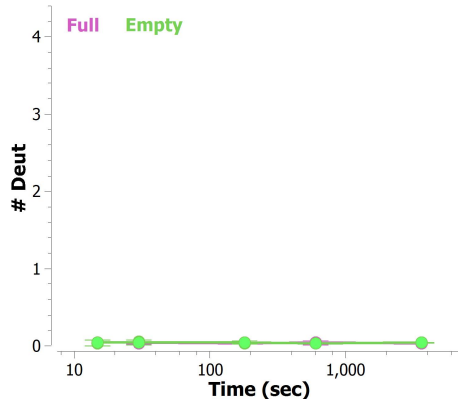

**AAV8\_VP1 684-703:  
EIEWELQKENS KRWNPEIQY  
(#447)**

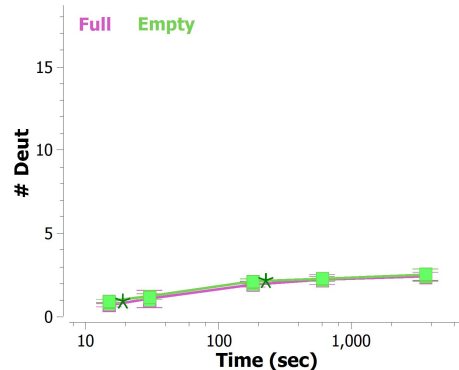

**AAV8\_VP1 684-705:  
EIEWELQKENS KRWNPEIQYTS  
(#448)**

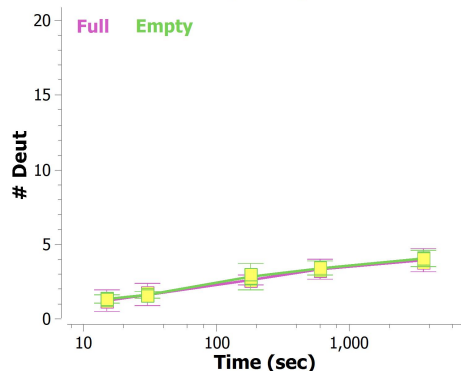

**AAV8\_VP1 684-706:  
EIEWELQKENS KRWNPEIQYTSN  
(#449)**

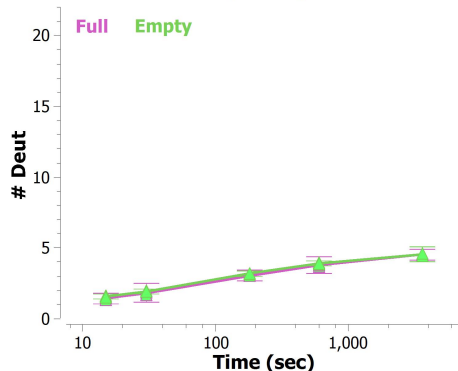

**AAV8\_VP1 684-707:  
EIEWELQKENS KRWNPEIQYTSNY  
(#450)**

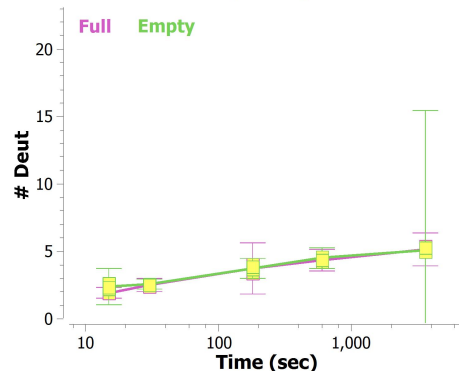

**AAV8\_VP1 685-689: IEWEL  
(#451)**

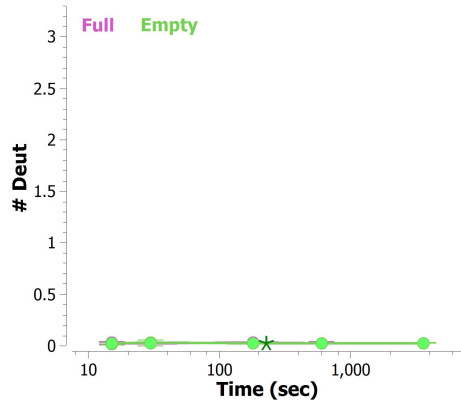

**AAV8\_VP1 685-690: IEWELQ  
(#452)**

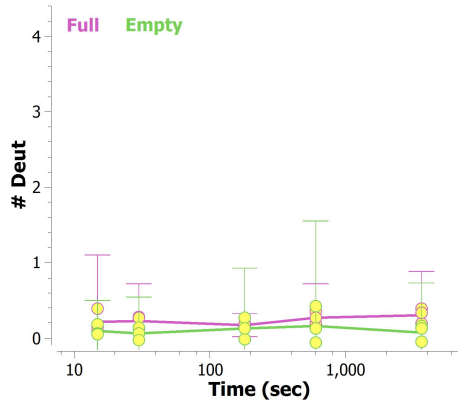

**AAV8\_VP1 685-702:  
IEWELQKENS KRWNPEIQ (#453)**

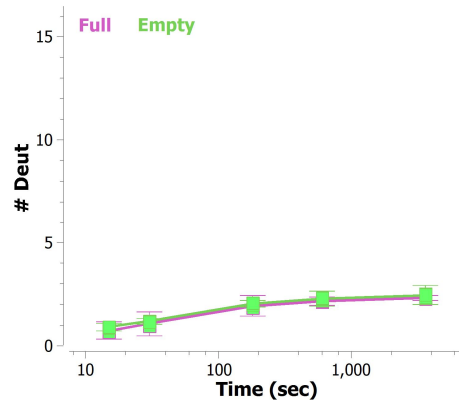

**AAV8\_VP1 685-703:  
IEWELQKENS KRWNPEIQY (#454)**

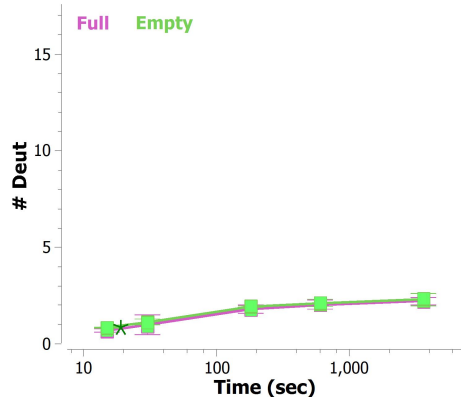

**AAV8\_VP1 685-706:  
IEWELQKENS KRWNPEIQYTSN  
(#455)**

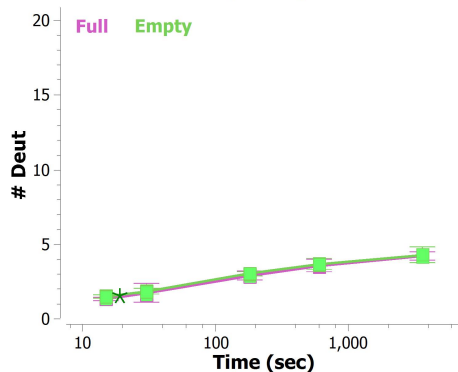

**AAV8\_VP1 685-707:  
IEWELQKENS KRWNPEIQYTSNY  
(#456)**

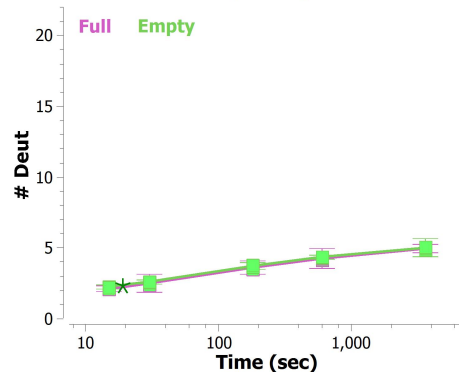

**AAV8\_VP1 687-703:  
WELQKNSKRWNPEIQY (#457)**

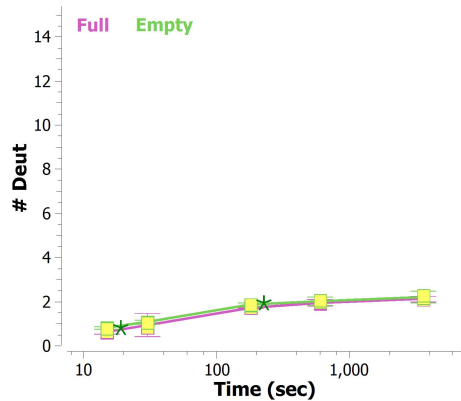

**AAV8\_VP1 687-706:  
WELQKNSKRWNPEIQYTSN (#458)**

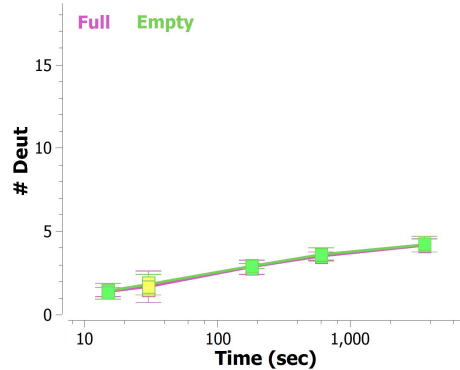

**AAV8\_VP1 688-703:  
ELQKNSKRWNPEIQY (#459)**

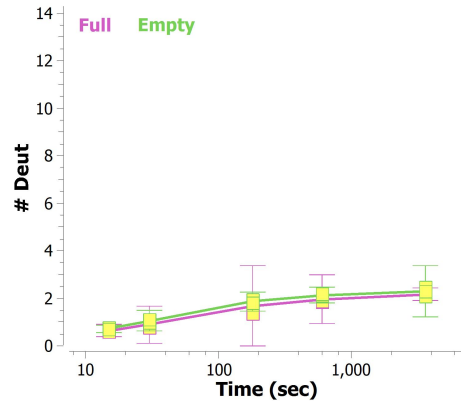

**AAV8\_VP1 688-706:  
ELQKNSKRWNPEIQYTSN (#460)**

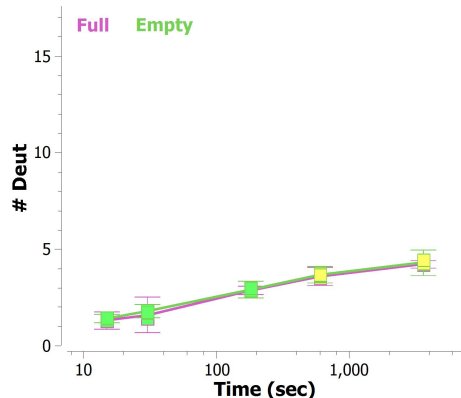

**AAV8\_VP1 689-706:  
LQKNSKRWNPEIQYTSN (#461)**

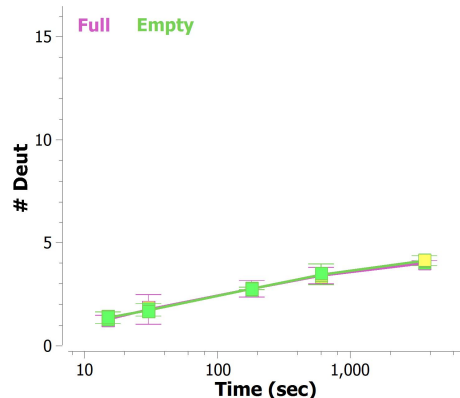

**AAV8\_VP1 690-702:  
QKNSKRWNPEIQY (#462)**

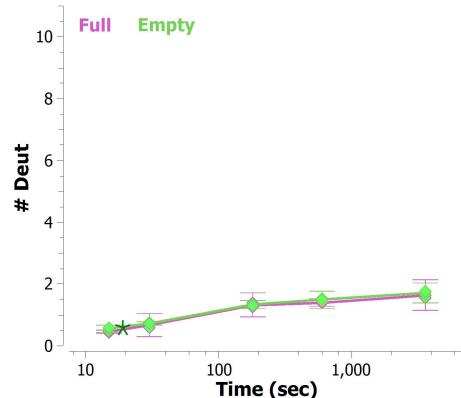

**AAV8\_VP1 690-703:  
QKNSKRWNPEIQY (#463)**

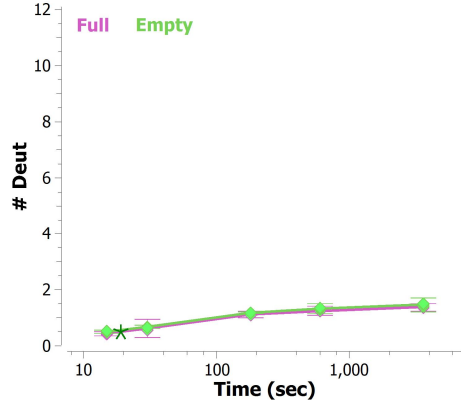

**AAV8\_VP1 690-706:  
QKNSKRWNPEIQYTSN (#464)**

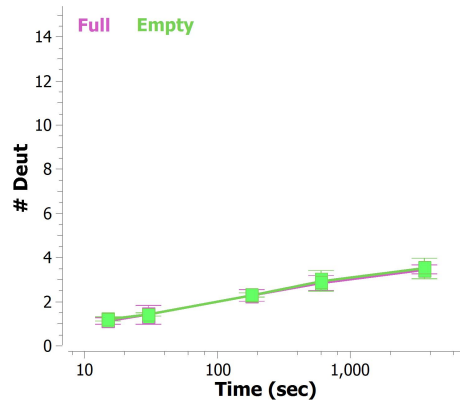

**AAV8\_VP1 690-707:  
QKNSKRWNPEIQYTSNY (#465)**

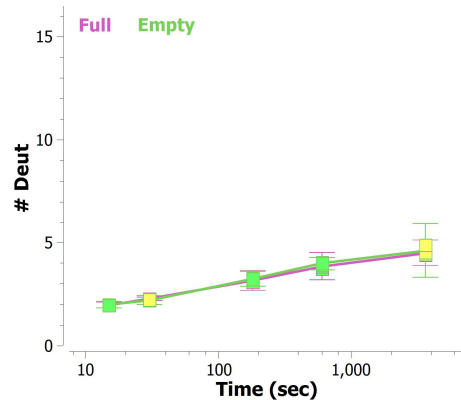

**AAV8\_VP1 691-703:  
KNSKRWNPEIQY (#466)**

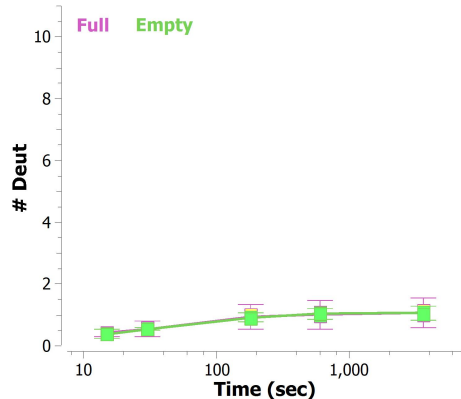

**AAV8\_VP1 695-703: KRWNPFIQY  
(#467)**

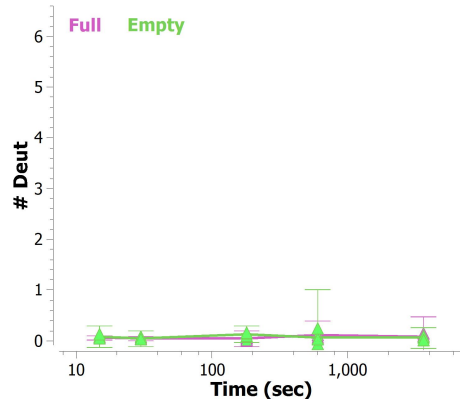

**AAV8\_VP1 695-706:  
KRWNPFIQYTSN (#468)**

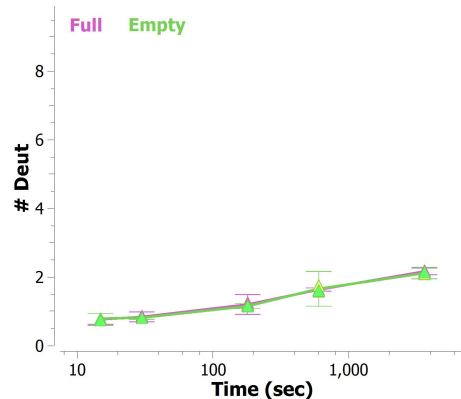

**AAV8\_VP1 703-707: YTSNY (#469)**

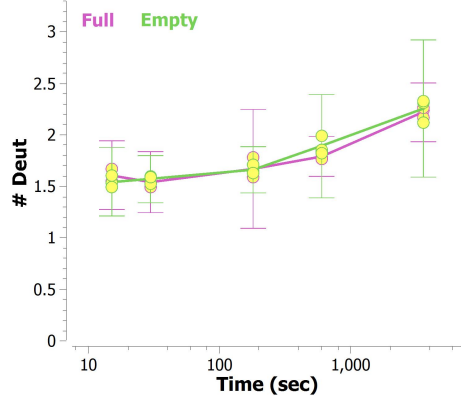

**AAV8\_VP1 704-707: TSNY (#470)**

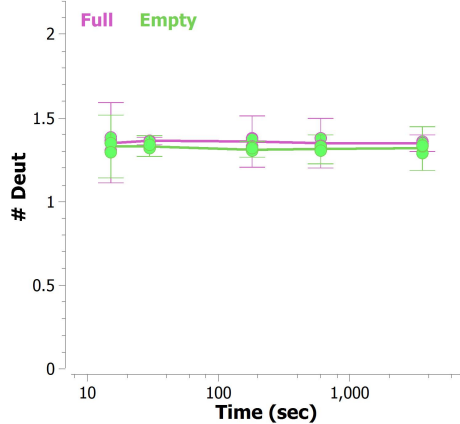

**AAV8\_VP1 704-714: TSNYYKSTSVSD (#471)**

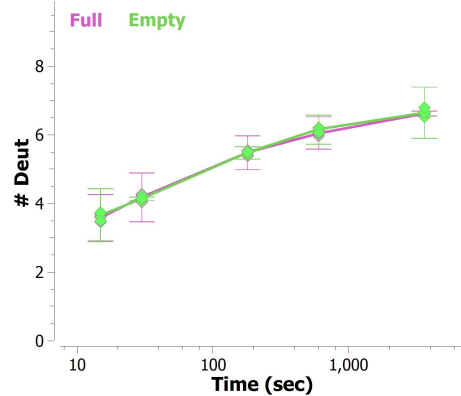

**AAV8\_VP1 704-715: TSNYYKSTSVDF (#472)**

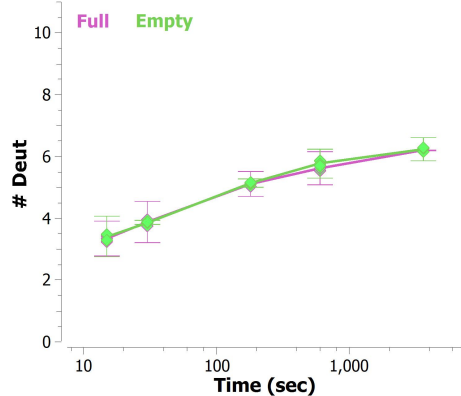

**AAV8\_VP1 707-714: YYKSTSVSD (#473)**

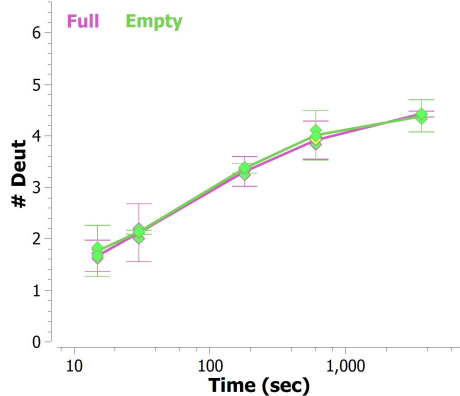

**AAV8\_VP1 707-715: YYKSTSVDF (#474)**

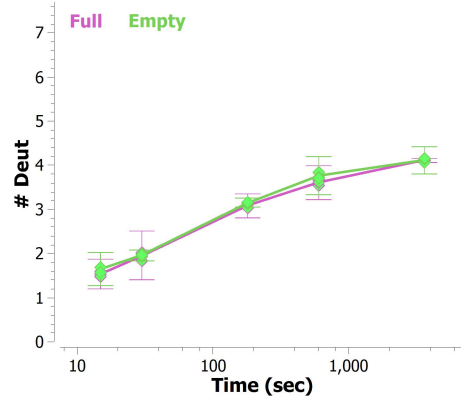

**AAV8\_VP1 708-715: YKSTSVDF (#475)**

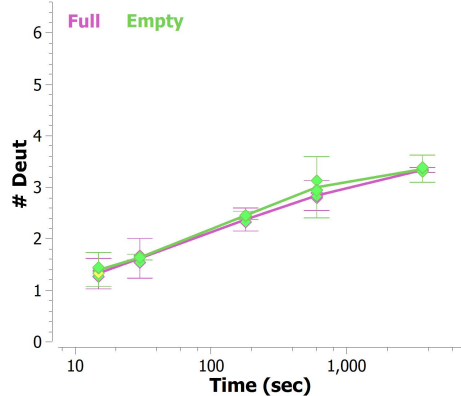

**AAV8\_VP1 715-722: FAVNTEGV (#476)**

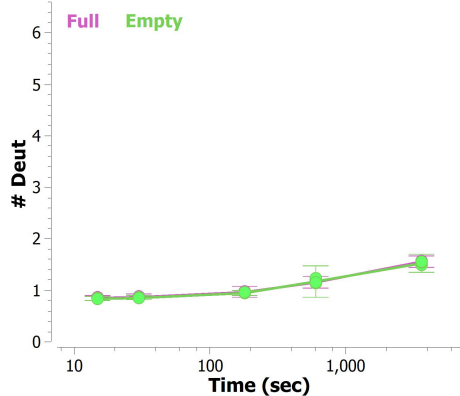

**AAV8\_VP1 715-733: FAVNTEGVYSEPRPIGTRY (#477)**

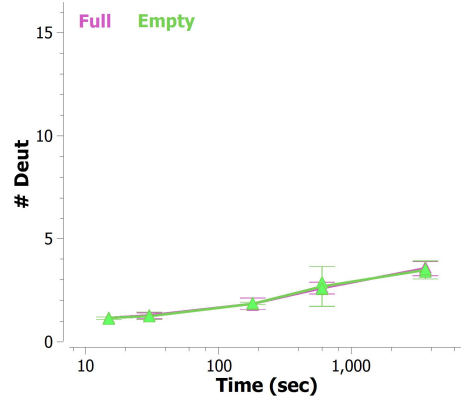

**AAV8\_VP1 715-738: FAVNTEGVYSEPRPIGTRYLTRNL (#478)**

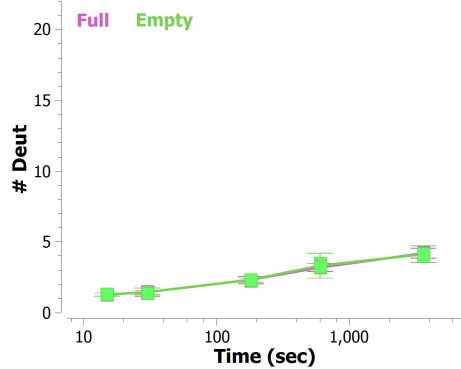

**AAV8\_VP1 716-722: AVNTEGV (#479)**

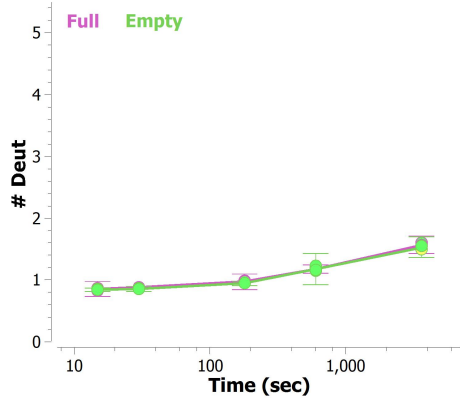

**AAV8\_VP1 716-731: AVNTEGVYSEPRPIGT (#480)**

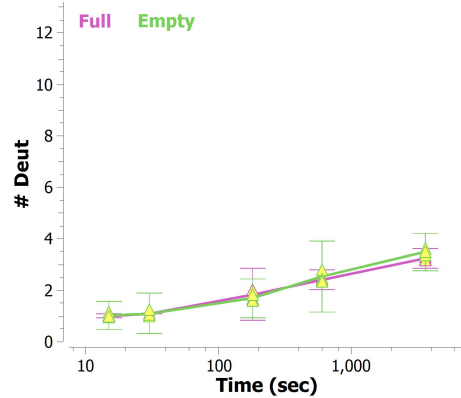



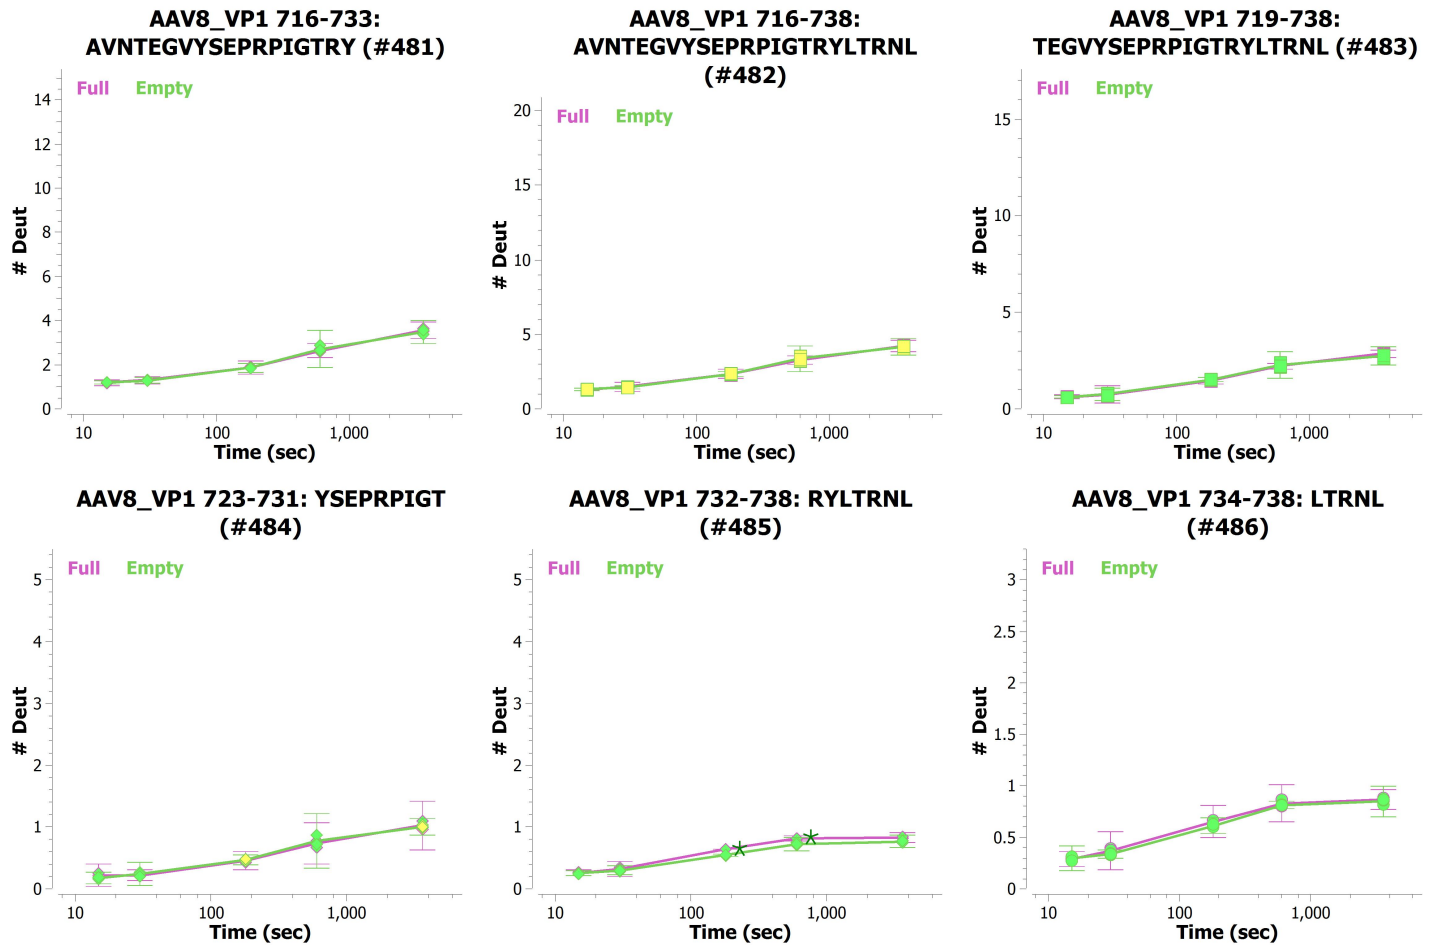

Supplementary Figure S5. Deuterium uptake plots of all peptides without any post translational modification except VP1 N-terminal peptides at a labeling temperature of 4 °C. Purple colored plots represents full capsid, and green colored plots represents empty capsid. Error bars representing standard deviation for each triplicate measurement are displayed.

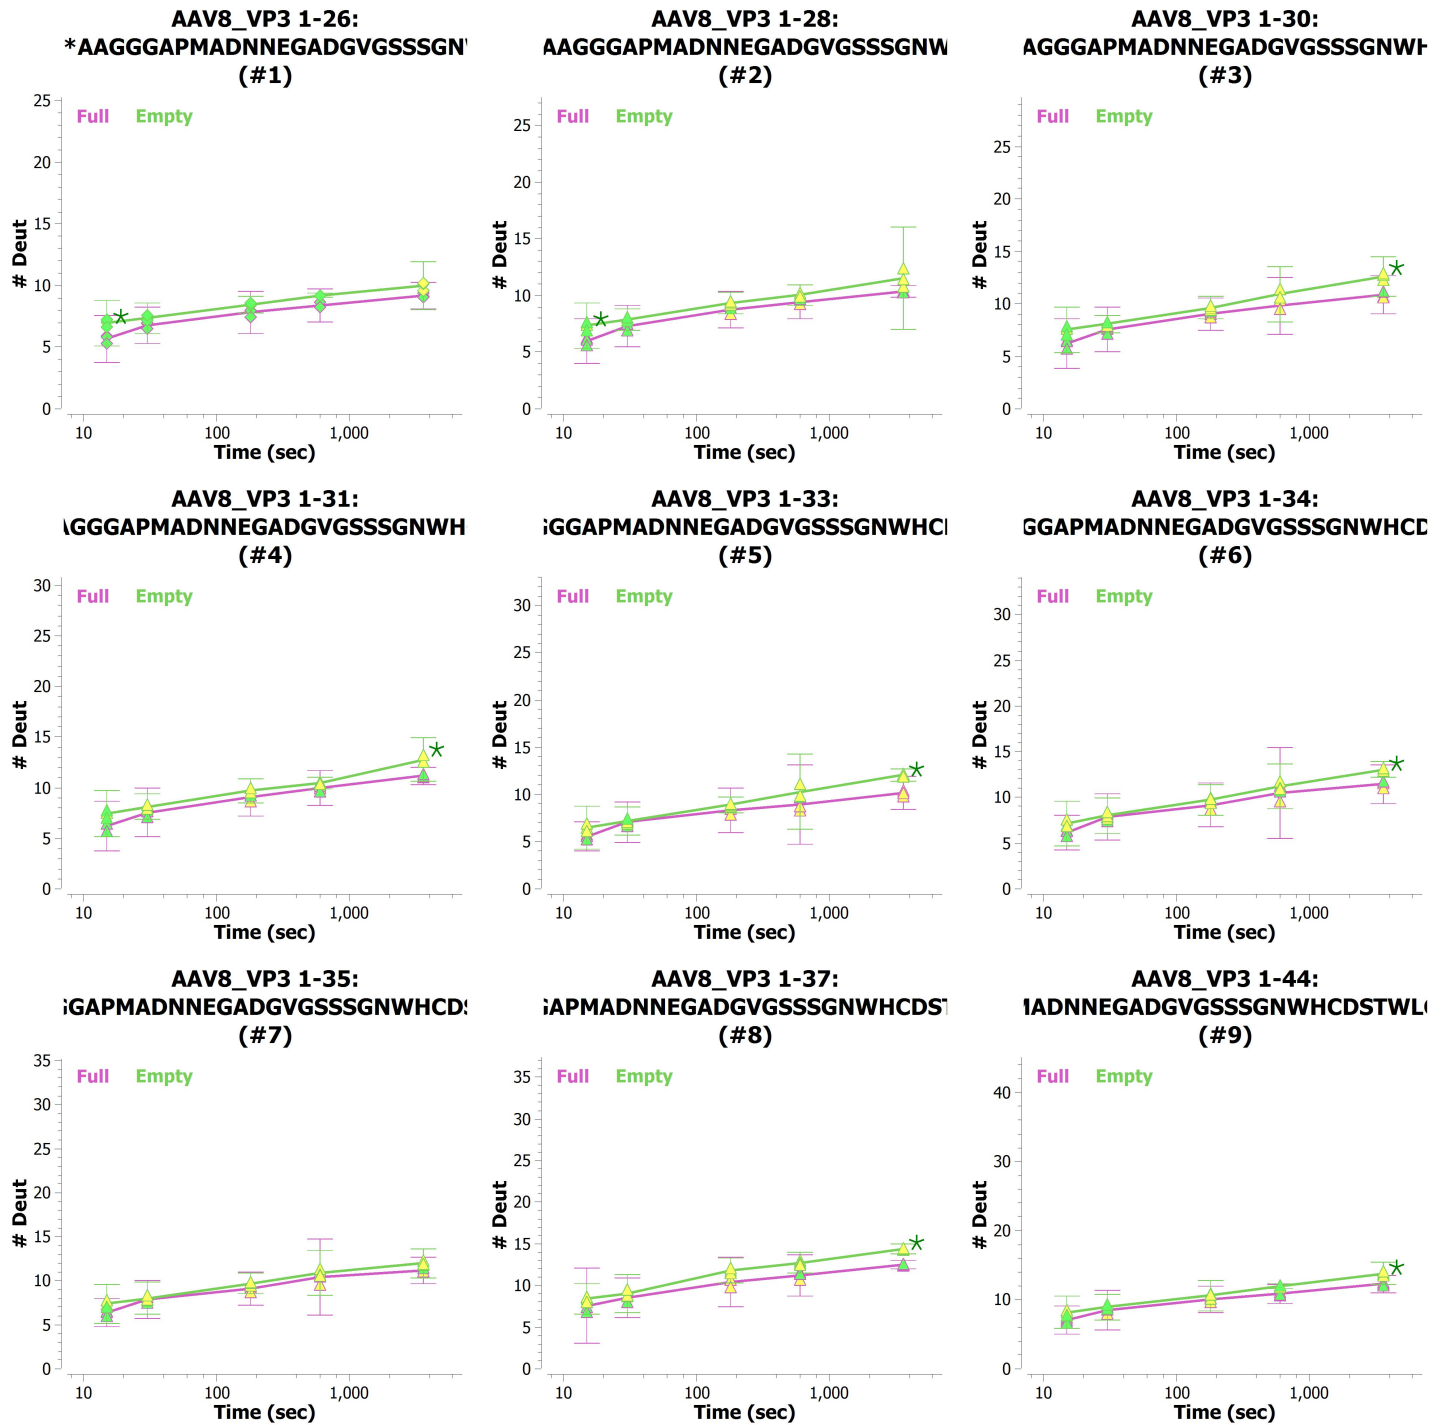

Supplementary Figure S6. Deuterium uptake plots of all peptides with N-terminal Met excision and acetylation of VP3 N-terminal peptides at a labeling temperature of 4 °C. Purple colored plots represents full capsid, and green colored plots represents empty capsid. Error bars representing standard deviation for each triplicate measurement are displayed.

**AAV8\_VP1 1-13:  
M\*AADGYLPDWLED (#1)**

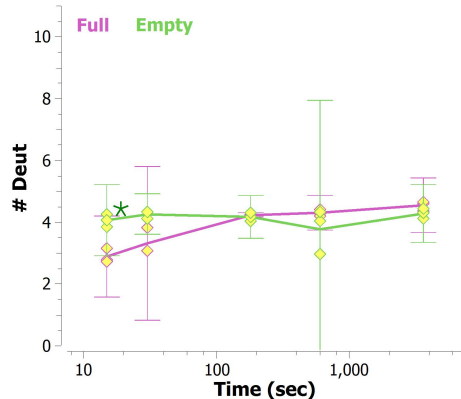

**AAV8\_VP1 1-14:  
M\*AADGYLPDWLEDN (#2)**

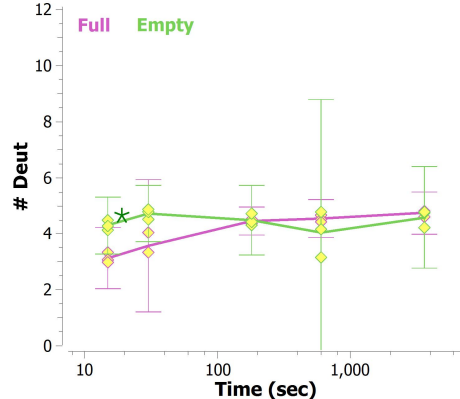

**AAV8\_VP1 12-18: EDNLSEG (#3)**

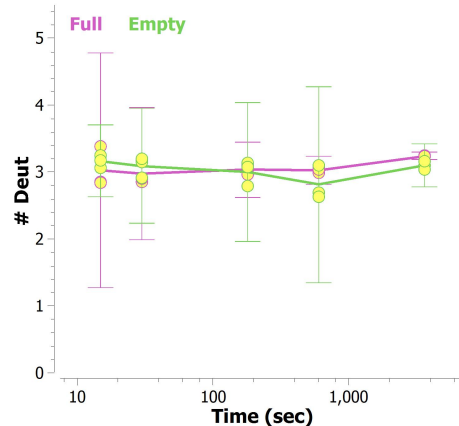

**AAV8\_VP1 12-21: EDNLSEGIRE  
(#4)**

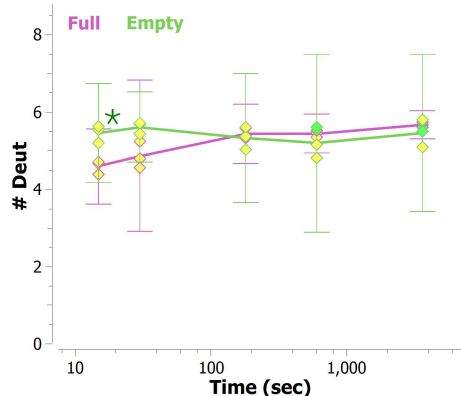

**AAV8\_VP1 16-22: SEGIREW (#5)**

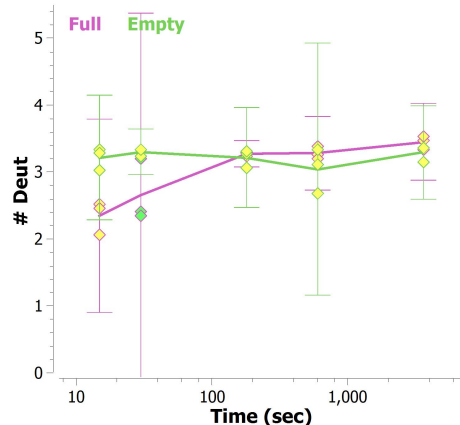

**AAV8\_VP1 68-83:  
ADAAALEHDKAYDQQL (#6)**

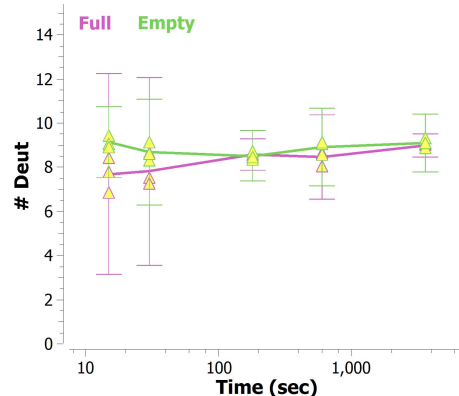

**AAV8\_VP1 70-100:  
LEHDKAYDQQLQAGDNPYLRYNHAD  
(#7)**

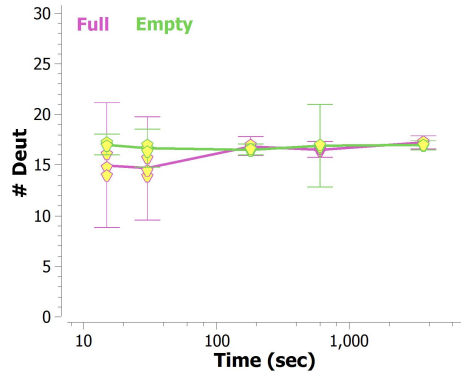

**AAV8\_VP1 71-78: AALEHDKA (#8)**

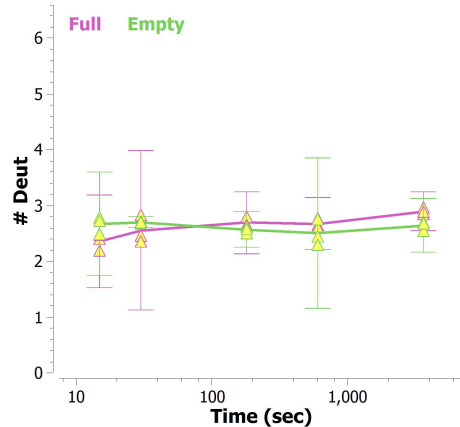

**AAV8\_VP1 71-83:  
AALEHDKAYDQQL (#9)**

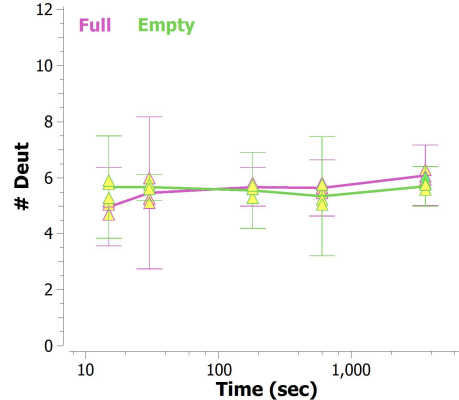

**AAV8\_VP1 71-96:  
AALEHDKAYDQQLQAGDNPYLRYNHA  
(#10)**

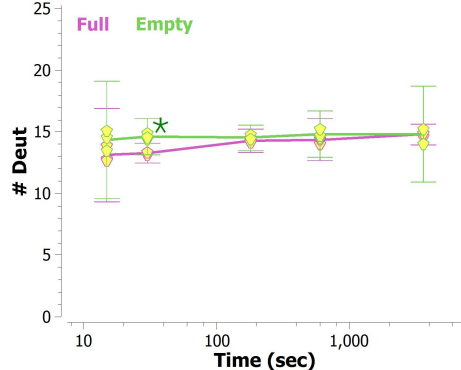

**AAV8\_VP1 71-99:  
LEHDKAYDQQLQAGDNPYLRYNHAD  
(#11)**

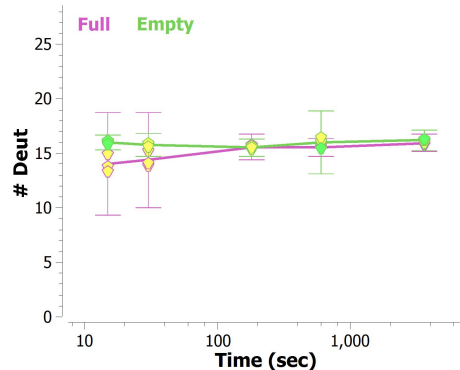

**AAV8\_VP1 73-83: LEHDKAYDQQL  
(#12)**

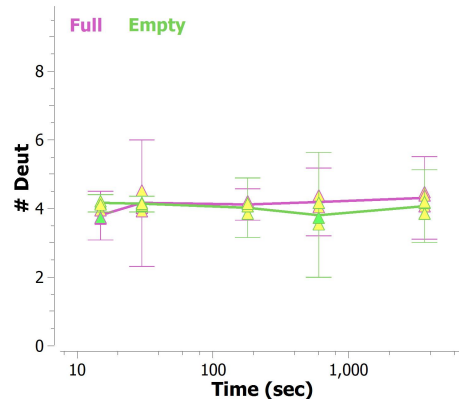

**AAV8\_VP1 73-99:  
EHDKAYDQQLQAGDNPYLRYNHADA  
(#13)**

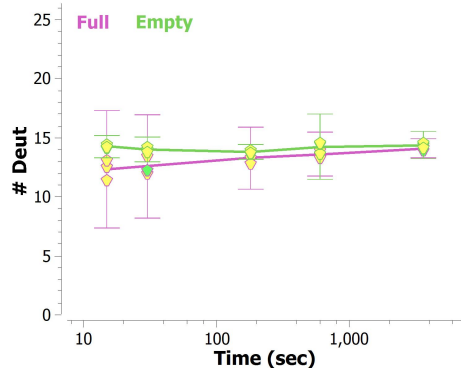

**AAV8\_VP1 74-96:  
EHDKAYDQQLQAGDNPYLRYNHA  
(#14)**

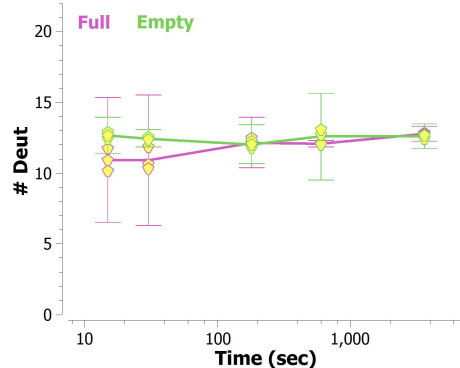

**AAV8\_VP1 74-99:  
EHDKAYDQQLQAGDNPYLRYNHADA  
(#15)**

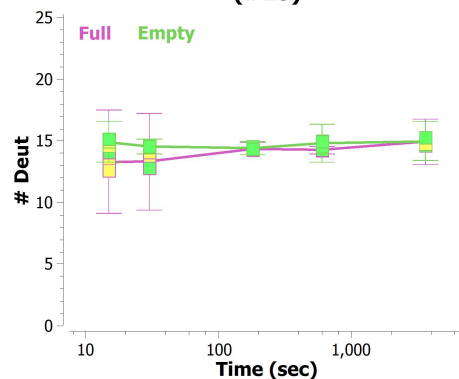

**AAV8\_VP1 74-100:  
HDKAYDQQLQAGDNPYLRYNHADA  
(#16)**

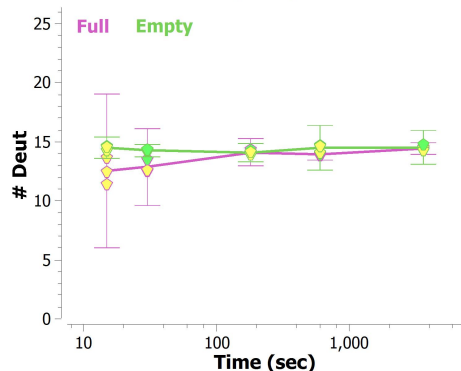

**AAV8\_VP1 79-83: YDQQL (#17)**

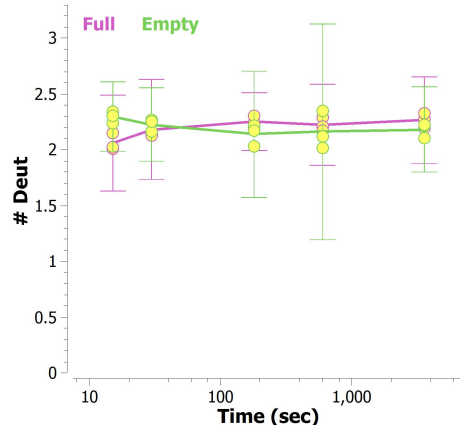

**AAV8\_VP1 79-96:  
YDQQLQAGDNPYLRYNHA (#18)**

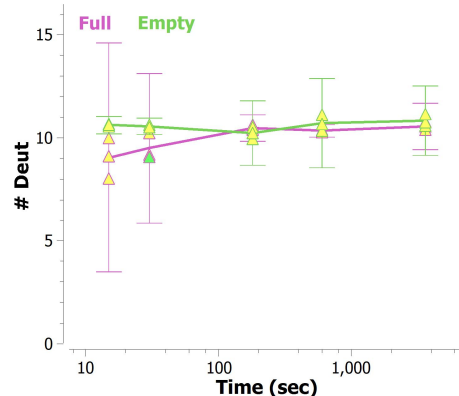

**AAV8\_VP1 79-99:  
YDQQLQAGDNPYLRYNHADA  
(#19)**

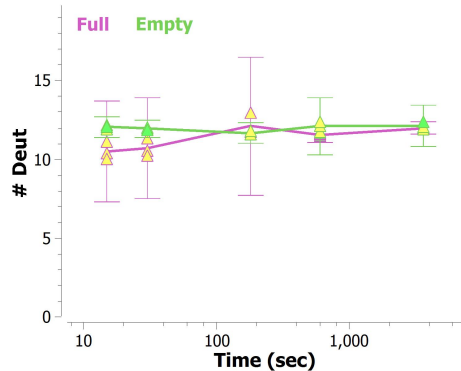

**AAV8\_VP1 84-91: QAGDNPYL  
(#20)**

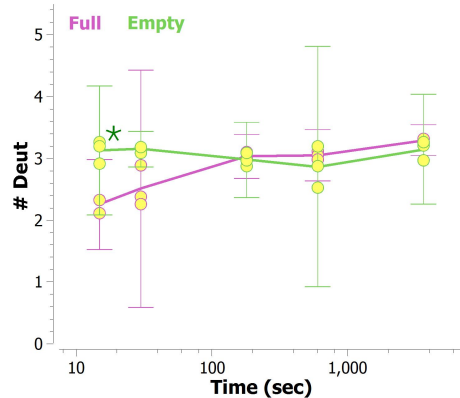

**AAV8\_VP1 84-96:  
QAGDNPYLRYNHA (#21)**

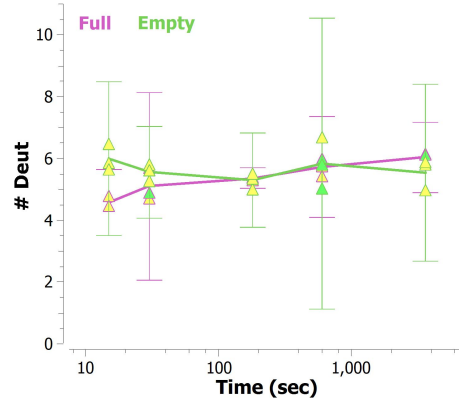

**AAV8\_VP1 84-99:  
QAGDNPYLRYNHADA  
(#22)**

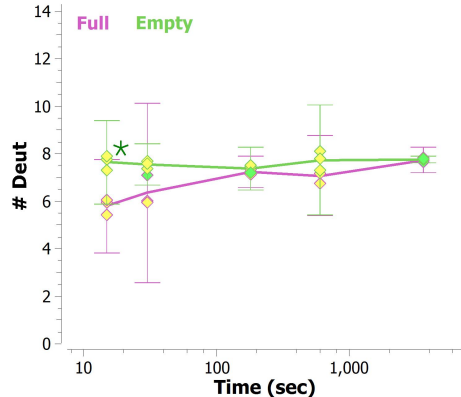

**AAV8\_VP1 84-100:  
QAGDNPYLRYNHADA  
(#23)**

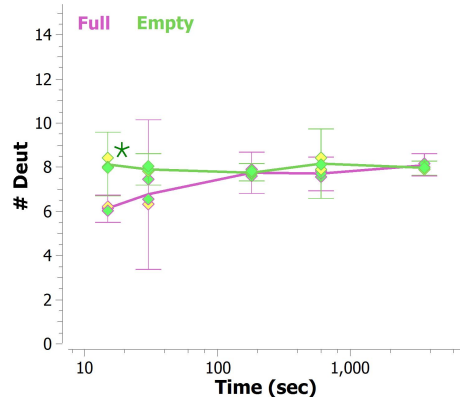

**AAV8\_VP1 89-100:  
PYLRYNHADA  
(#24)**

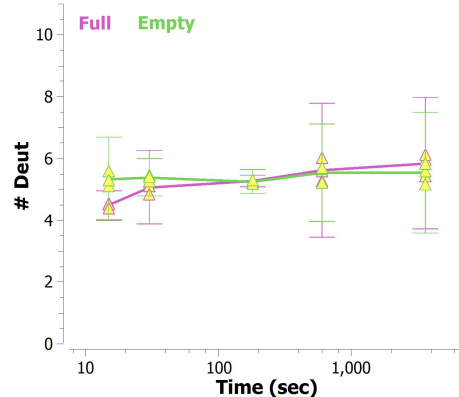

**AAV8\_VP1 92-99: RYNHADA E (#25)**

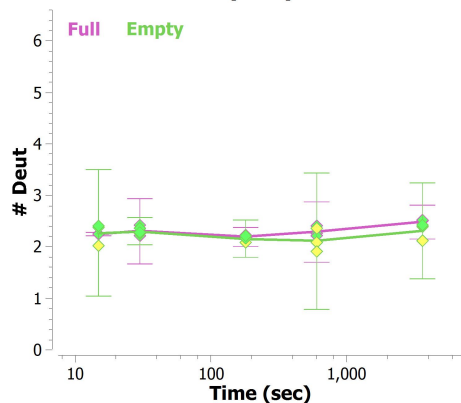

**AAV8\_VP1 100-106: FQERLQ E (#26)**

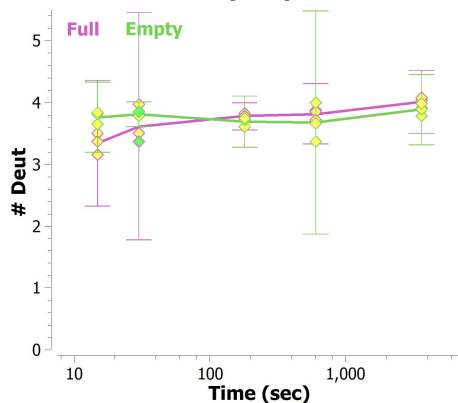

**AAV8\_VP1 101-106: QERLQ E (#27)**

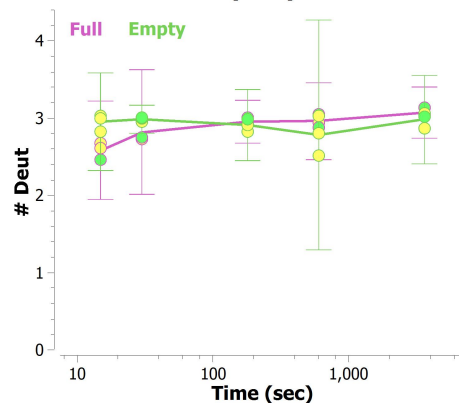

**AAV8\_VP1 101-107: QERLQED (#28)**

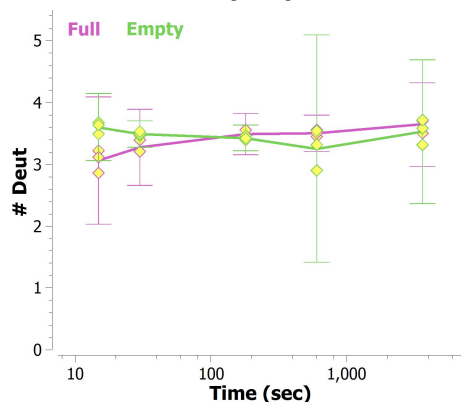

**AAV8\_VP1 101-110: QERLQEDTSF (#29)**

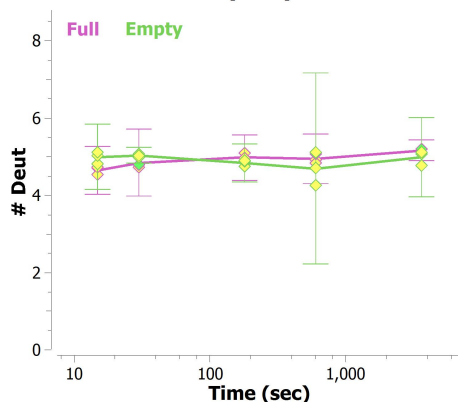

**AAV8\_VP1 101-119: QERLQEDTSFGGNLGRAVF (#30)**

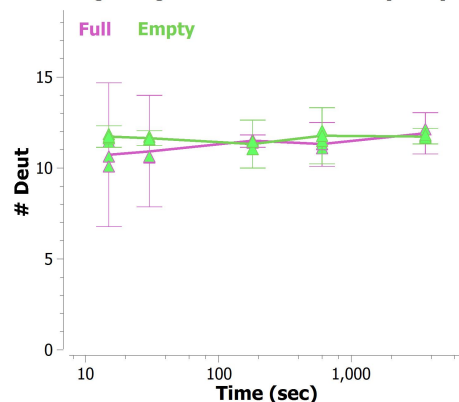

**AAV8\_VP1 101-131: RLQEDTSFGGNLGRAVFQAKKRVLEPI (#31)**

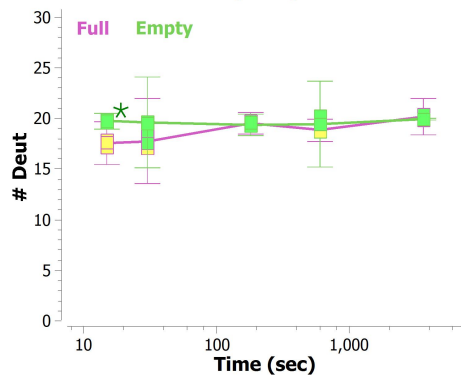

**AAV8\_VP1 105-110: QEDTSF (#32)**

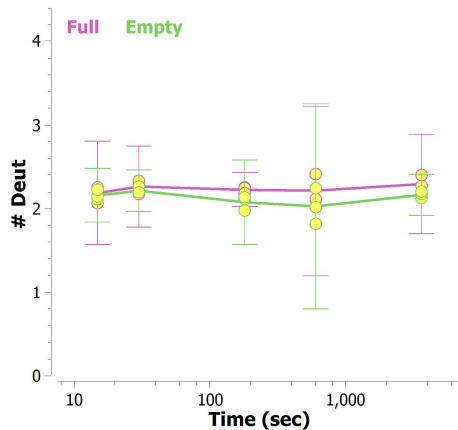

**AAV8\_VP1 105-119: QEDTSFGGNLGRAVF (#33)**

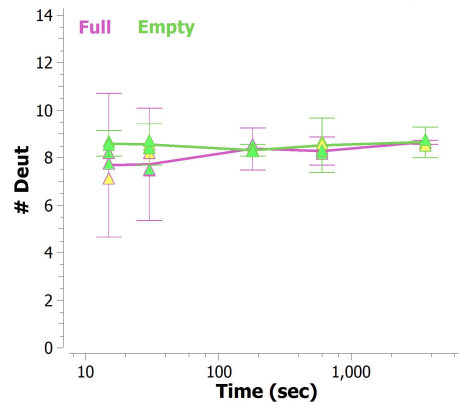

**AAV8\_VP1 107-119: DTSFGGNLGRAVF (#34)**

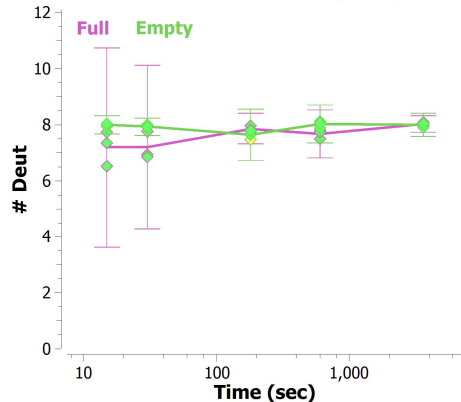

**AAV8\_VP1 107-131: DTSFGGNLGRAVFQAKKRVLEPLGL (#35)**

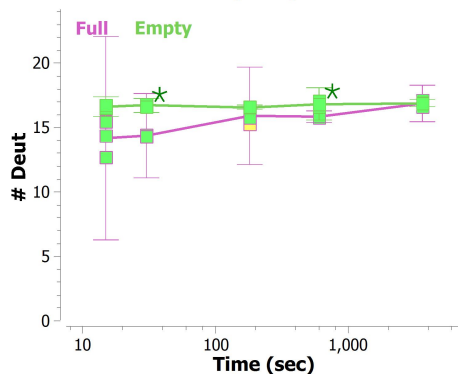

**AAV8\_VP1 111-119: GGNLGRAVF (#36)**

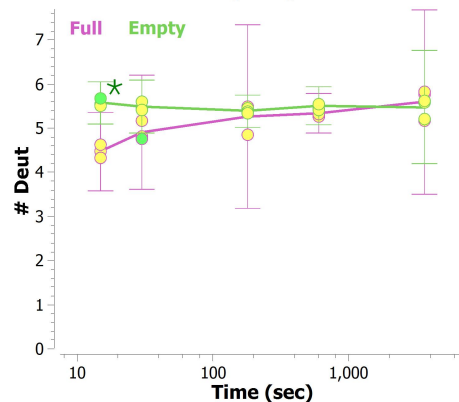

**AAV8\_VP1 111-131:  
GGNLGRAVFQAKKRVLEPLGL  
(#37)**

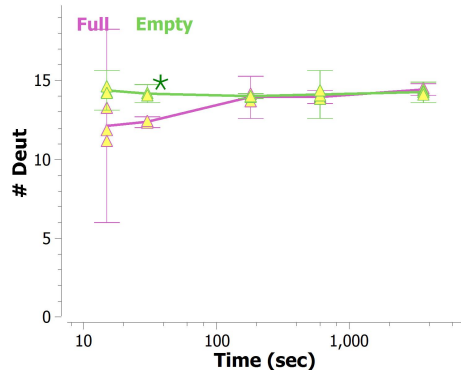

**AAV8\_VP1 120-131:  
QAKKRVLEPLGL (#38)**

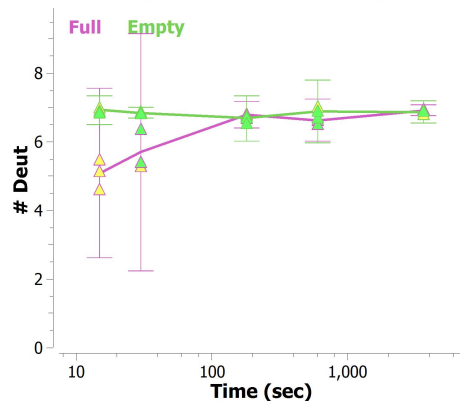

**AAV8\_VP1 205-229:  
AAGGGAPMADNNEGADGVGSSSGNW  
(#39)**

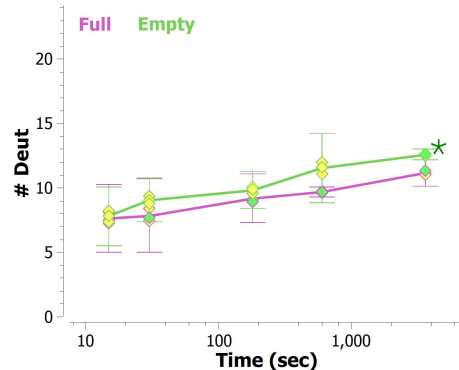

**AAV8\_VP1 205-238:  
APMADNNEGADGVGSSSGNWHCDST  
(#40)**

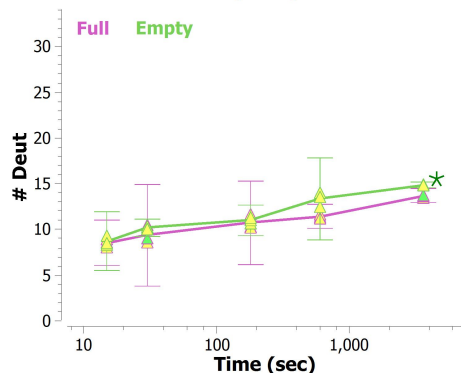

**AAV8\_VP1 215-229:  
NNEGADGVGSSSGNW (#41)**

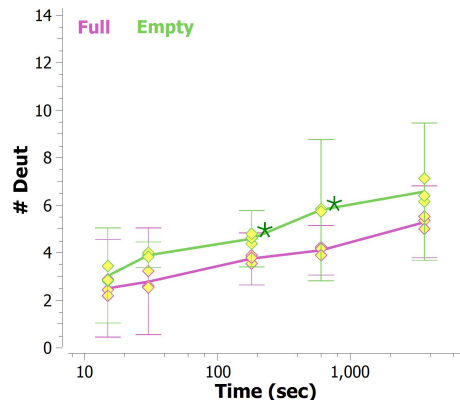

**AAV8\_VP1 229-238:  
WHCDSTWLGD (#42)**

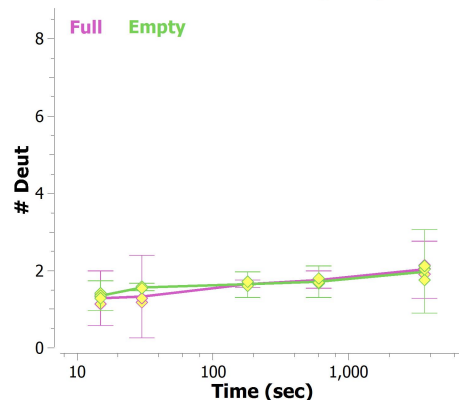

**AAV8\_VP1 230-236: HCDSTWL  
(#43)**

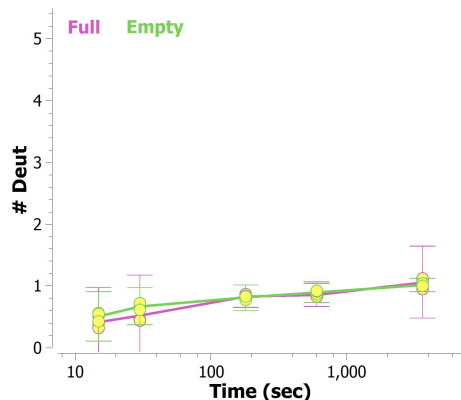

**AAV8\_VP1 230-238: HCDSTWLGD  
(#44)**

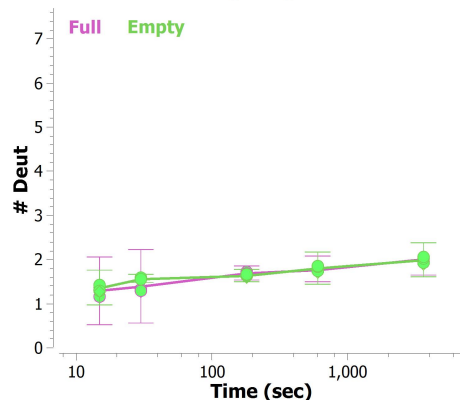

**AAV8\_VP1 230-240:  
HCDSTWLGDREV (#45)**

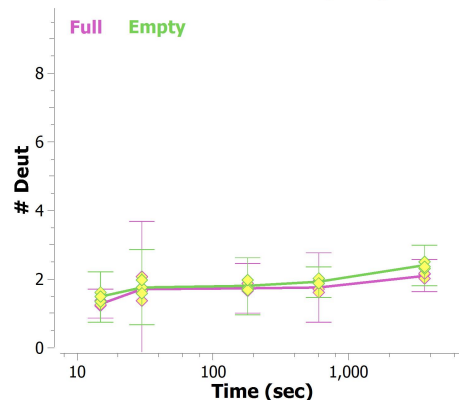

**AAV8\_VP1 230-242:  
HCDSTWLGDREVIT (#46)**

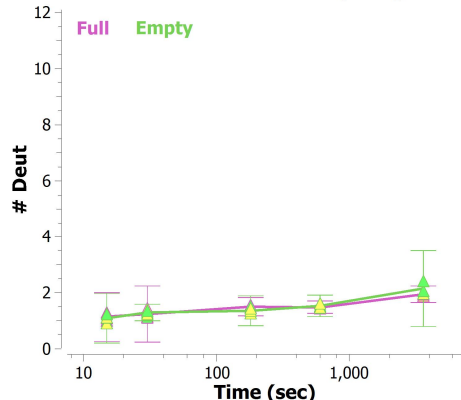

**AAV8\_VP1 230-243:  
HCDSTWLGDREVITT (#47)**

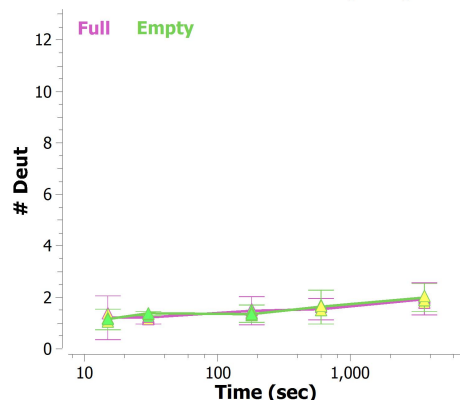

**AAV8\_VP1 230-247:  
HCDSTWLGDREVITTSTRT (#48)**

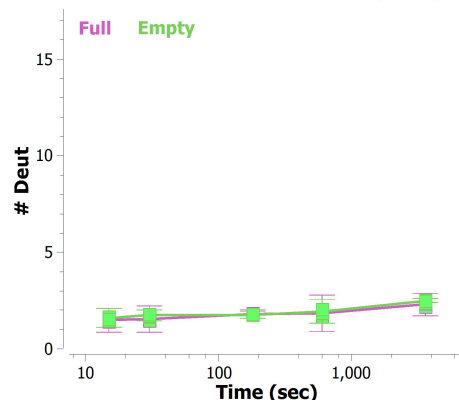

**AAV8\_VP1 230-257:  
CDSTWLGDRVITTSTRTWALPTYNNH  
(#49)**

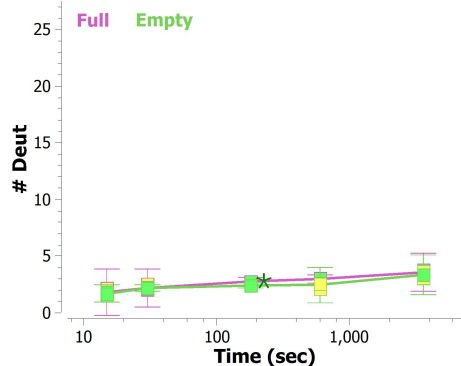

**AAV8\_VP1 232-243:  
DSTWLGDRVITT (#50)**

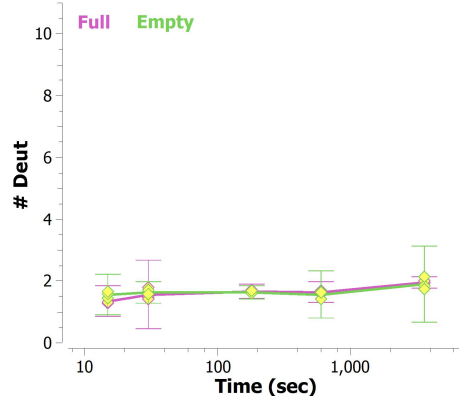

**AAV8\_VP1 232-247:  
DSTWLGDRVITTSTRT (#51)**

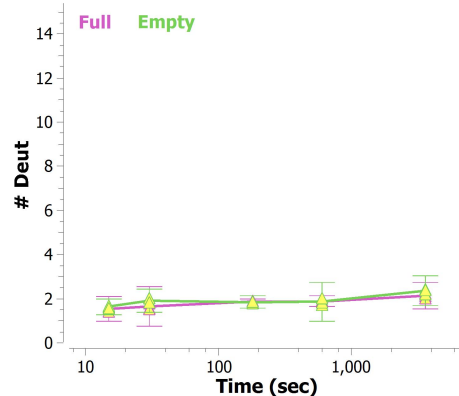

**AAV8\_VP1 234-238: TWLGD  
(#52)**

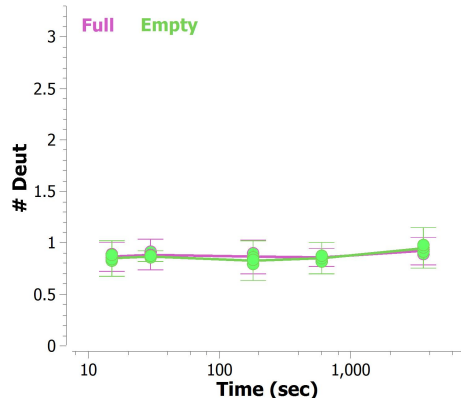

**AAV8\_VP1 234-247:  
TWLGDRVITTSTRT (#53)**

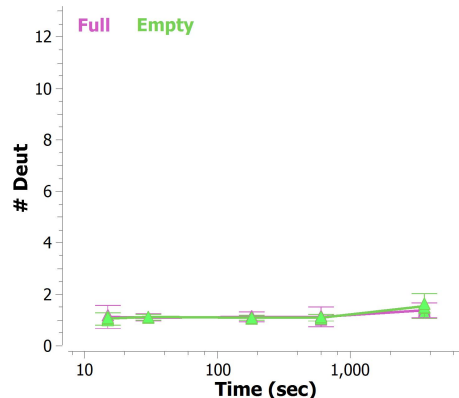

**AAV8\_VP1 235-247:  
WLGDRVITTSTRT (#54)**

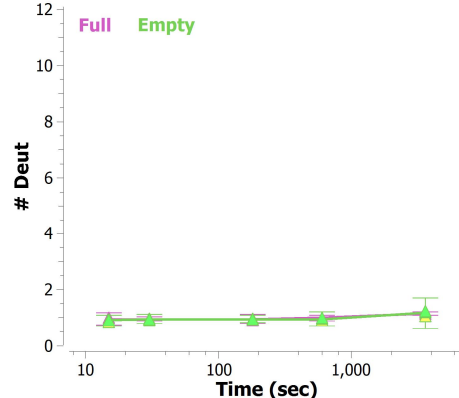

**AAV8\_VP1 236-247:  
LGDRVITTSTRT (#55)**

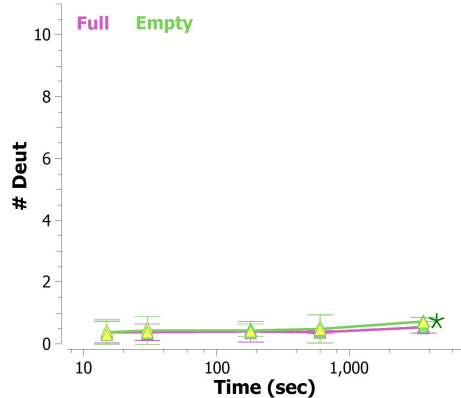

**AAV8\_VP1 236-257:  
LGDRVITTSTRTWALPTYNNHL  
(#56)**

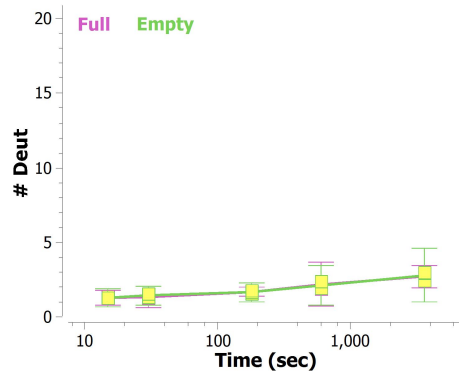

**AAV8\_VP1 237-247: GDRVITTSTRT  
(#57)**

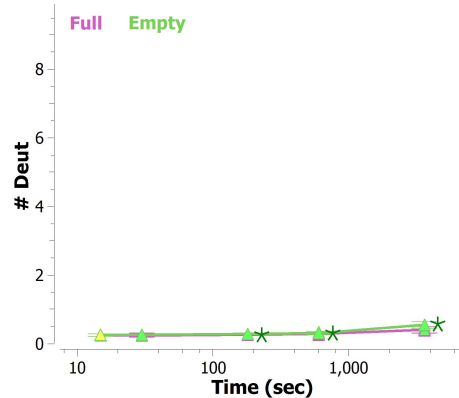

**AAV8\_VP1 237-257:  
GDRVITTSTRTWALPTYNNHL  
(#58)**

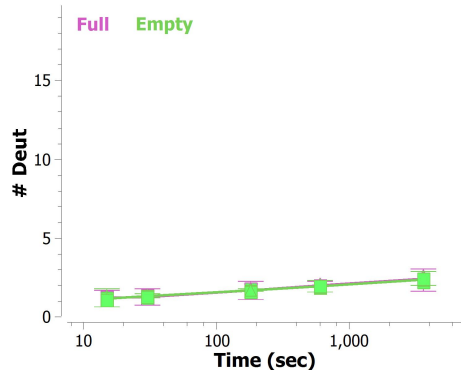

**AAV8\_VP1 238-247: DRVITTSTRT  
(#59)**

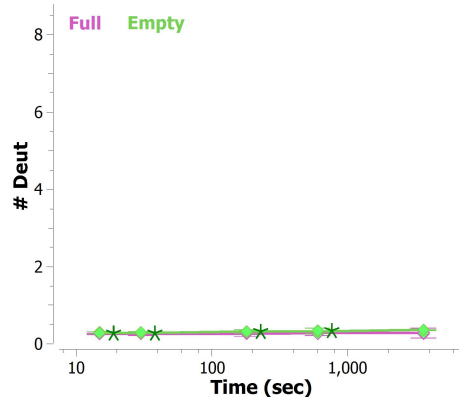

**AAV8\_VP1 239-243: RVITT (#60)**

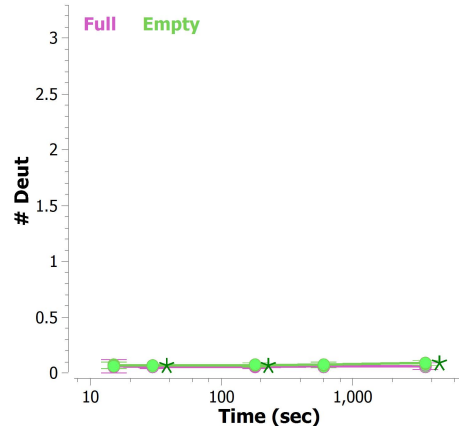



**AAV8\_VP1 239-245: RVITTST  
(#61)**

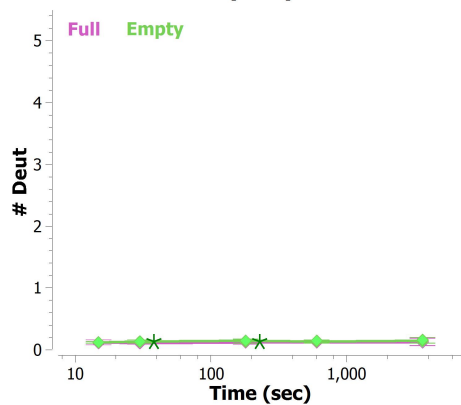

**AAV8\_VP1 239-247: RVITTSTRT  
(#62)**

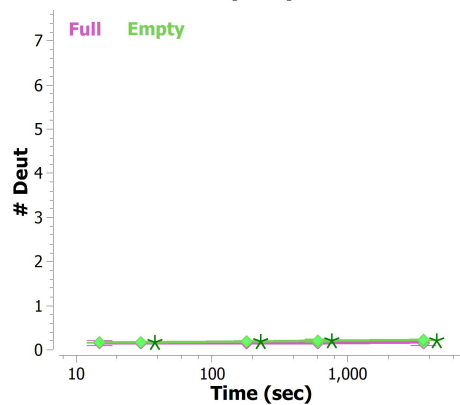

**AAV8\_VP1 239-250: RVITTSTRTWAL  
(#63)**

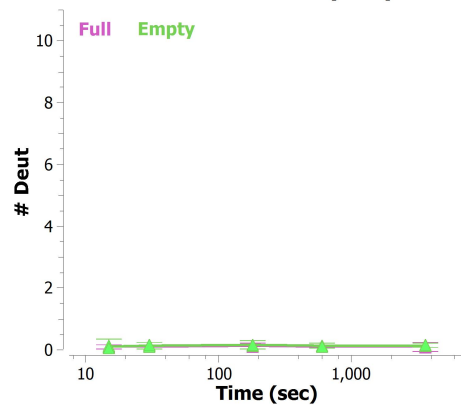

**AAV8\_VP1 239-257: RVITTSTRTWALPTYNNHL  
(#64)**

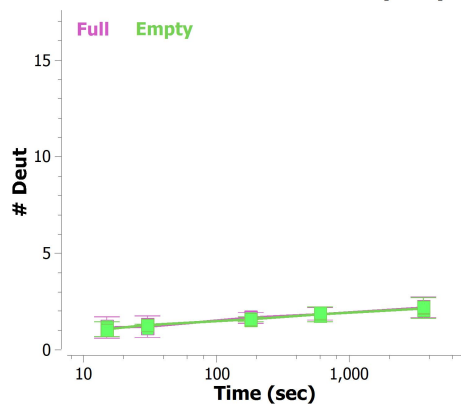

**AAV8\_VP1 241-257: ITTSTRTWALPTYNNHL  
(#65)**

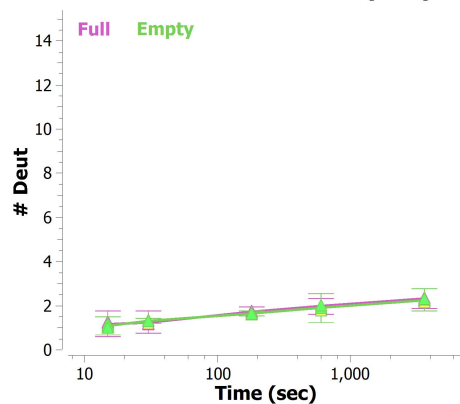

**AAV8\_VP1 243-247: TSTRT (#66)**

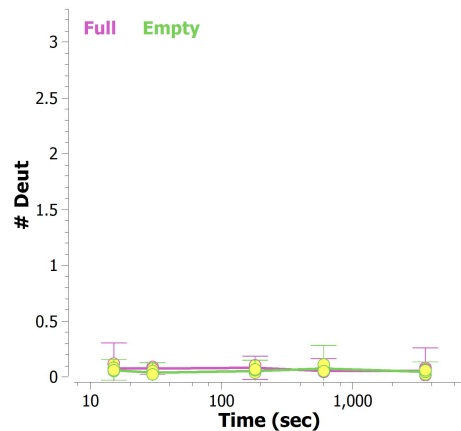

**AAV8\_VP1 243-257: TSTRTWALPTYNNHL  
(#67)**

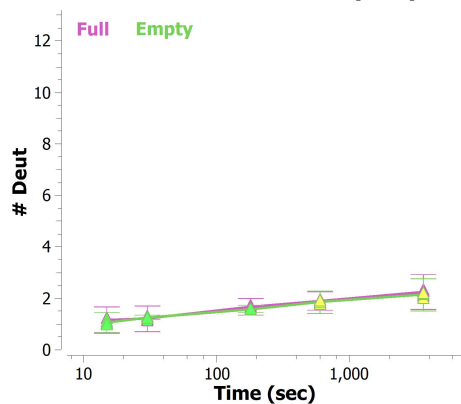

**AAV8\_VP1 244-257: STRTWALPTYNNHL  
(#68)**

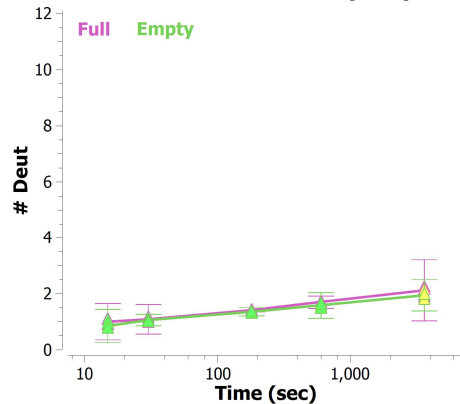

**AAV8\_VP1 245-257: TRTWALPTYNNHL  
(#69)**

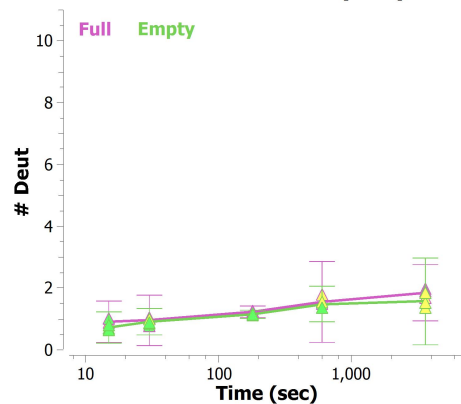

**AAV8\_VP1 246-257: RTWALPTYNNHL  
(#70)**

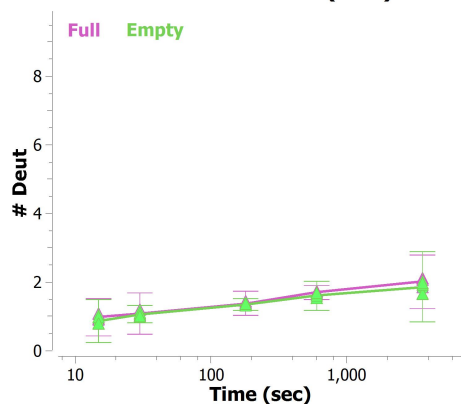

**AAV8\_VP1 248-257: WALPTYNNHL  
(#71)**

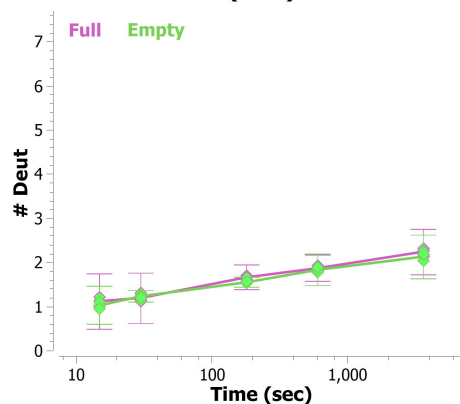

**AAV8\_VP1 250-257: LPTYNNHL  
(#72)**

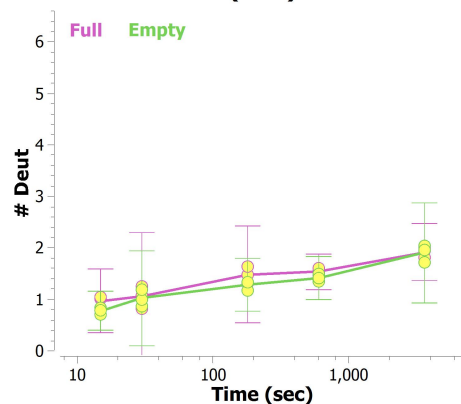

**AAV8\_VP1 251-257: PTYNNHL**  
**(#73)**

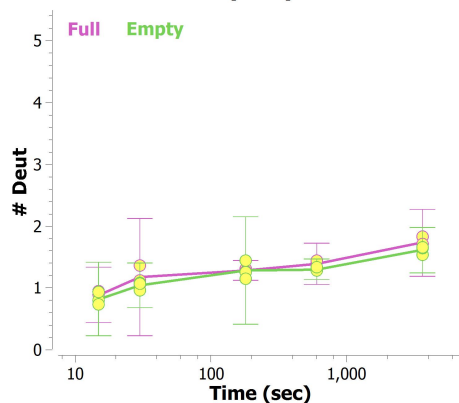

**AAV8\_VP1 258-264: YKQISNG**  
**(#74)**

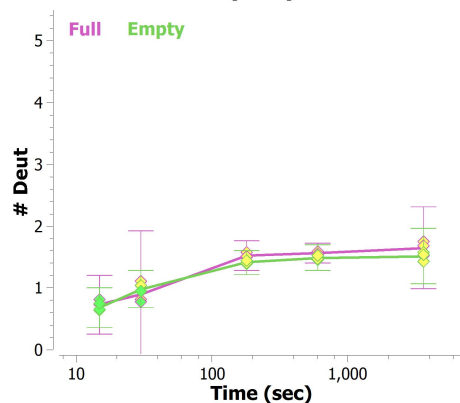

**AAV8\_VP1 258-266: YKQISNGTS**  
**(#75)**

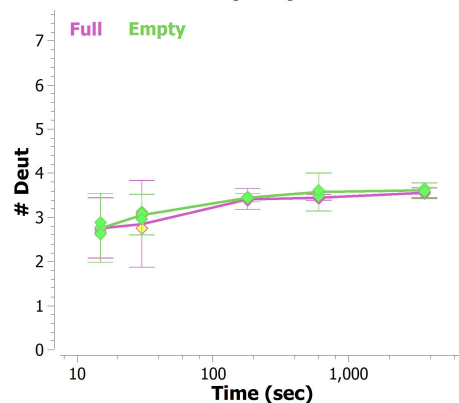

**AAV8\_VP1 258-275:  
YKQISNGTSGGATNDNTY (#76)**

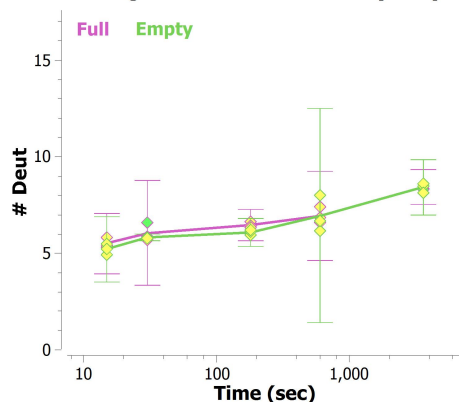

**AAV8\_VP1 277-285: GYSTPWGYF  
(#77)**

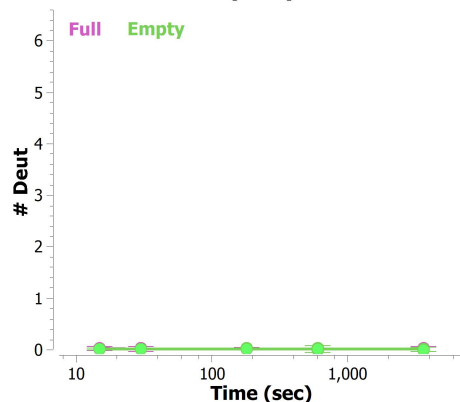

**AAV8\_VP1 278-284: YSTPWGY**  
**(#78)**

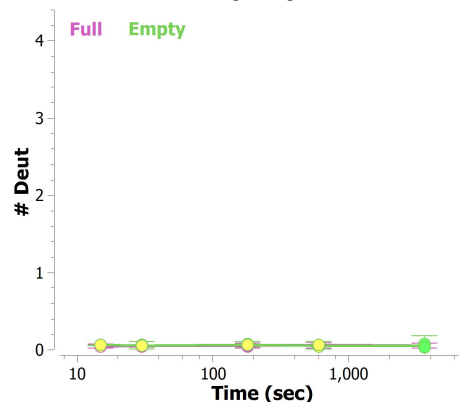

**AAV8\_VP1 278-285: YSTPWGYF  
(#79)**

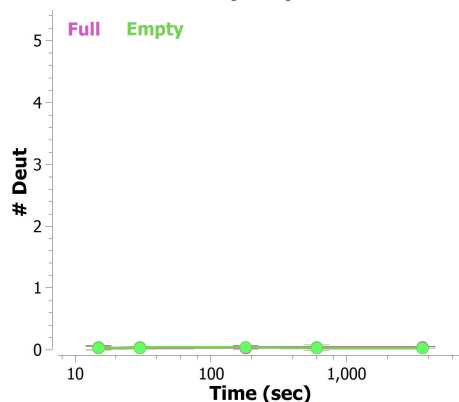

**AAV8\_VP1 278-286: YSTPWGYFD  
(#80)**

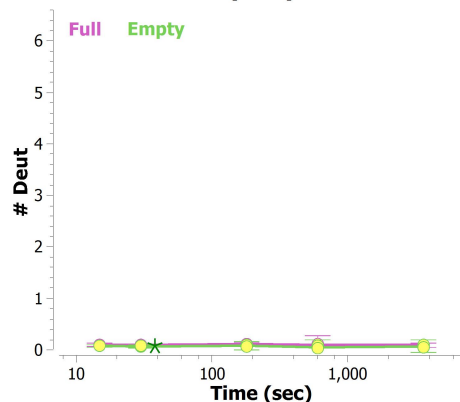

**AAV8\_VP1 286-290: DFNRF (#81)**

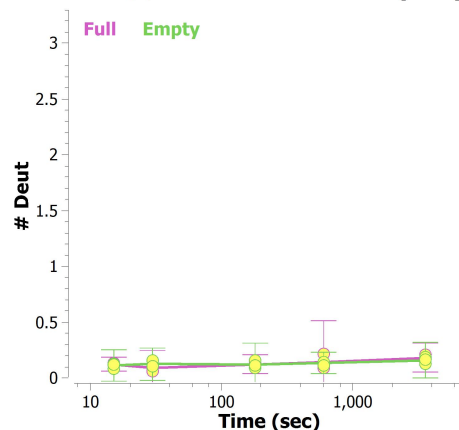

**AAV8\_VP1 286-294: DFNRFHCHF  
(#82)**

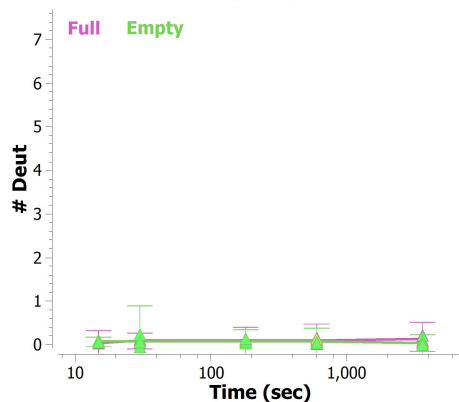

**AAV8\_VP1 286-298:  
DFNRFHCHFSPRD (#83)**

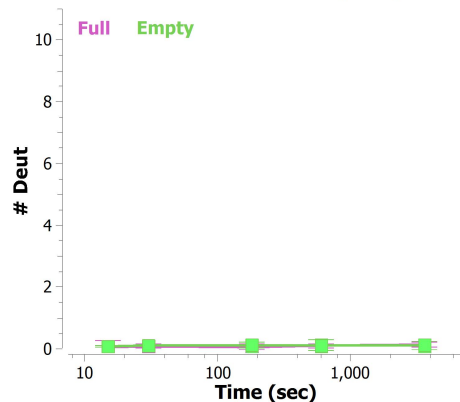

**AAV8\_VP1 286-299:  
DFNRFHCHFSPRDW (#84)**

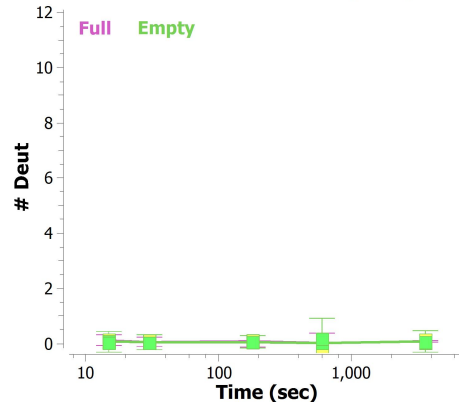

**AAV8\_VP1 286-306:  
DFNRFHCHFSPRDWQRLINN**  
(#85)

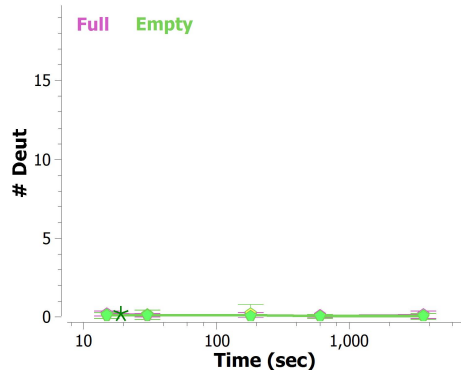

**AAV8\_VP1 291-298: HCHFSPRD**  
(#86)

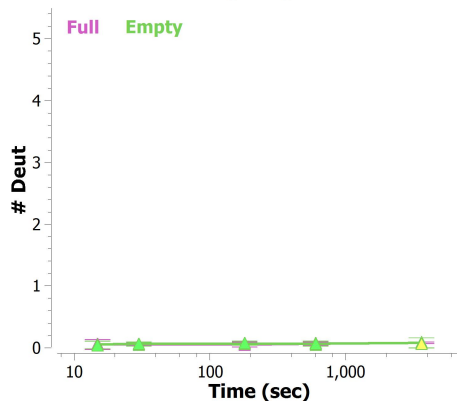

**AAV8\_VP1 291-299: HCHFSPRDW**  
(#87)

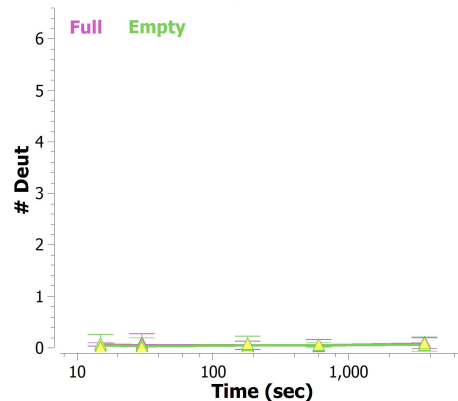

**AAV8\_VP1 291-302:  
HCHFSPRDWQRL** (#88)

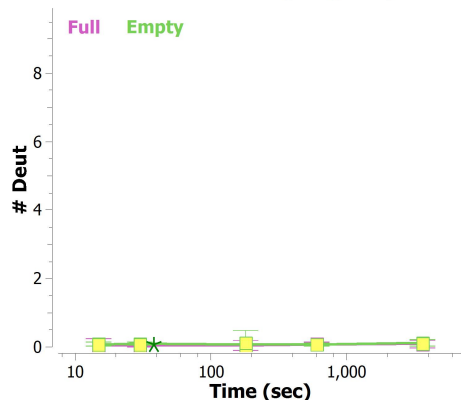

**AAV8\_VP1 299-306: WQRLINN**  
(#89)

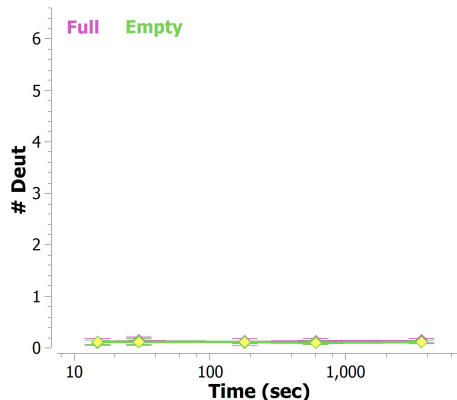

**AAV8\_VP1 299-307: WQRLINN**  
(#90)

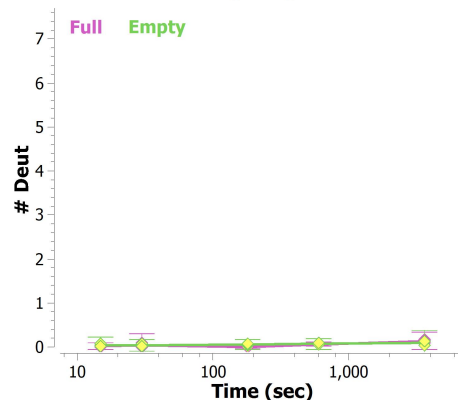

**AAV8\_VP1 303-316:  
INNNGWFRPKRLSF** (#91)

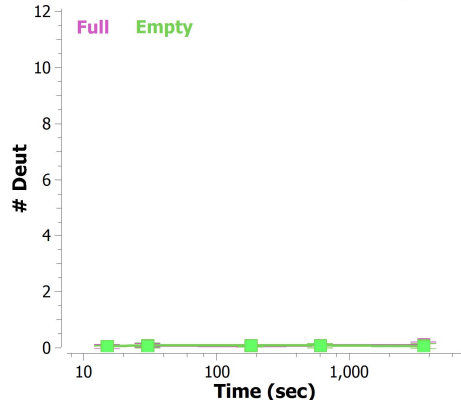

**AAV8\_VP1 303-318:  
INNNGWFRPKRLSFKL** (#92)

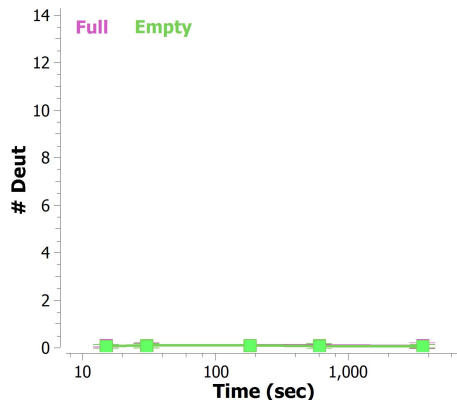

**AAV8\_VP1 317-320: KLFN** (#93)

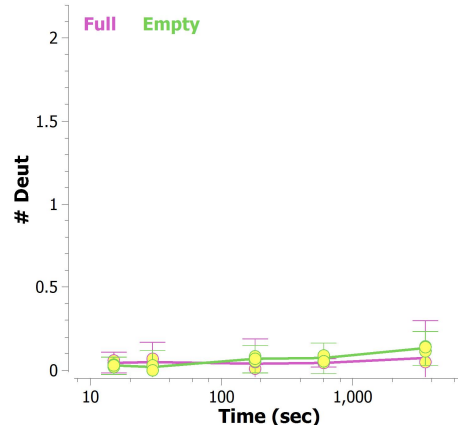

**AAV8\_VP1 317-322: KLFNIQ** (#94)

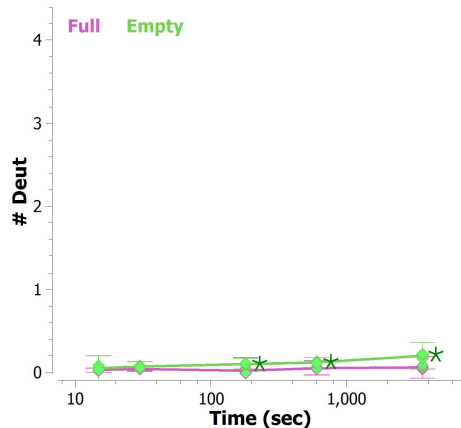

**AAV8\_VP1 317-323: KLFNIQV**  
(#95)

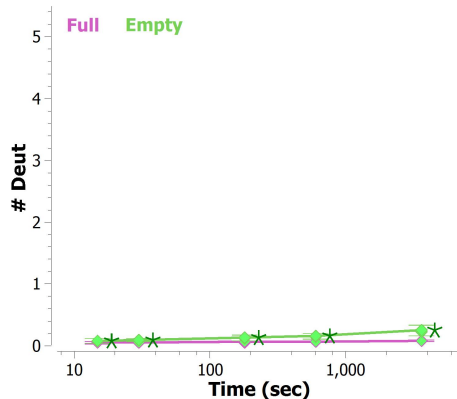

**AAV8\_VP1 317-325: KLFNIQVKE**  
(#96)

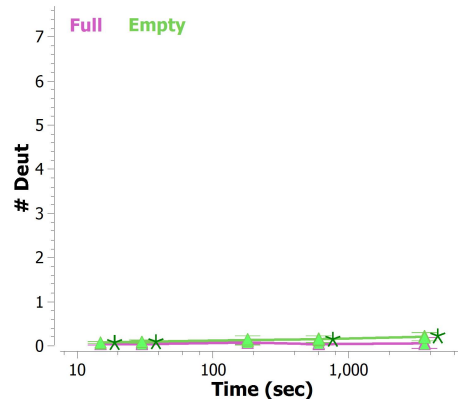

| Number of nodes | Empty (sec) | Full (sec) |
|-----------------|-------------|------------|
| 1               | ~100        | ~100       |
| 2               | ~150        | ~100       |
| 100             | ~200        | ~150       |
| 500             | ~250        | ~200       |
| 10,000          | ~600        | ~300       |

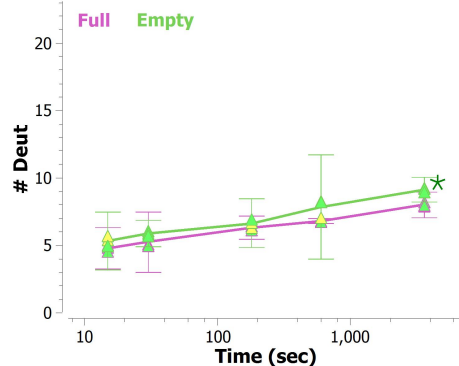

Figure 1 is a line graph showing the number of deuteron fragments (# Deut) versus Time (sec) for two conditions: Full (purple line) and Empty (green line). The x-axis is logarithmic, ranging from 10 to 10,000 seconds. The y-axis ranges from 0 to 25. Both conditions show an increase in deuteron fragments over time, with the Empty condition consistently having a higher number of fragments than the Full condition. Error bars are shown for each data point.

| Time (sec) | # Deut (Full) | # Deut (Empty) |
|------------|---------------|----------------|
| 15         | ~5.5          | ~6.5           |
| 30         | ~5.0          | ~6.0           |
| 200        | ~6.5          | ~7.5           |
| 600        | ~7.0          | ~8.5           |
| 3000       | ~9.5          | ~11.0          |

| Time (sec) | Full (# Deut) | Empty (# Deut) |
|------------|---------------|----------------|
| 10         | ~5.0          | ~5.5           |
| 20         | ~5.5          | ~6.0           |
| 100        | ~6.0          | ~6.5           |
| 200        | ~6.5          | ~7.0*          |
| 500        | ~7.0          | ~8.5*          |
| 10,000     | ~8.5          | ~10.5*         |

| Time (sec) | # Deut (Full) | # Deut (Empty) |
|------------|---------------|----------------|
| 15         | 4.5           | 5.5            |
| 30         | 5.0           | 6.0            |
| 150        | 6.0           | 6.5            |
| 600        | 7.0           | 8.0            |
| 3000       | 8.5           | 10.5           |

The graph shows the number of deuterons (# Deut) on the y-axis (0 to 5) against time in seconds (sec) on a logarithmic x-axis (10 to 1,000). Two data series are plotted: 'Full' (purple line with diamond markers) and 'Empty' (green line with diamond markers). Both series remain very close to 0 deuterons across the entire time range, with only minor fluctuations visible around the 100-second mark.

| Time (sec) | Full (# Deut) | Empty (# Deut) |
|------------|---------------|----------------|
| 10         | 0.0           | 0.0            |
| 20         | 0.0           | 0.0            |
| 30         | 0.0           | 0.0            |
| 50         | 0.0           | 0.0            |
| 100        | 0.0           | 0.0            |
| 200        | 0.0           | 0.0            |
| 500        | 0.0           | 0.0            |
| 1000       | 0.0           | 0.0            |

Figure 1 is a line graph showing the number of deuteron fragments (# Deut) versus Time (sec) for two conditions: Full (red) and Empty (green). The x-axis is logarithmic, ranging from 10 to 10,000 seconds. The y-axis ranges from 0 to 20. Both conditions show an increase in the number of deuteron fragments over time, with the Empty condition generally having a higher count than the Full condition. Error bars are shown for each data point.

| Time (sec) | # Deut (Full) | # Deut (Empty) |
|------------|---------------|----------------|
| 15         | ~4.5          | ~5.0           |
| 30         | ~5.0          | ~5.5           |
| 150        | ~6.0          | ~6.5           |
| 600        | ~6.5          | ~7.5           |
| 3000       | ~8.0          | ~9.0*          |

| Time (sec) | Full (# Deut) | Empty (# Deut) |
|------------|---------------|----------------|
| 150        | ~5.5          | ~5.5           |
| 300        | ~5.5          | ~6.0           |
| 1500       | ~6.5          | ~6.5           |
| 3000       | ~8.5          | ~9.5           |

| Time (sec) | # Deut (Full) | # Deut (Empty) |
|------------|---------------|----------------|
| 15         | 5.0           | 5.5            |
| 30         | 5.0           | 6.0            |
| 150        | 6.5           | 7.0            |
| 600        | 7.0           | 8.5            |
| 3000       | 9.0           | 10.5           |

| Time (sec) | Full (# Deut) | Empty (# Deut) |
|------------|---------------|----------------|
| 20         | 5.5 ± 0.5     | 5.0 ± 0.5      |
| 30         | 5.5 ± 0.5     | 6.0 ± 0.5      |
| 150        | 6.5 ± 0.5     | 6.5 ± 0.5      |
| 500        | 7.0 ± 0.5     | 8.0 ± 0.5      |
| 1500       | 8.5 ± 0.5     | 10.5 ± 0.5     |

| Time (sec) | # Deut (Full) | # Deut (Empty) |
|------------|---------------|----------------|
| 15         | 4.5           | 4.8            |
| 30         | 5.0           | 5.2            |
| 150        | 5.8           | 6.2            |
| 600        | 6.5           | 7.5            |
| 3000       | 8.5           | 9.5            |

Figure 10: Deuteron number vs. Time. The graph plots the number of deuterons (# Deut) on the y-axis (0 to 15) against Time in seconds on a logarithmic x-axis (10 to 4000). Two data series are shown: 'Full' (purple line) and 'Empty' (green line). Both series show an upward trend. The 'Full' series starts at ~5.5 at 100s and reaches ~8.5 at 4000s. The 'Empty' series starts at ~5.5 at 100s and reaches ~9.5 at 4000s, with an asterisk (\*) indicating a significant difference from the 'Full' condition at that time point. Error bars are included for all data points.

| Time (sec) | Full (# Deut) | Empty (# Deut) |
|------------|---------------|----------------|
| 100        | ~5.5          | ~5.5           |
| 200        | ~5.5          | ~6.0           |
| 500        | ~6.0          | ~7.5           |
| 4000       | ~8.5          | ~9.5*          |

**AAV8\_VP1 320-342:  
NIQVKEVTQNEGTKTIANNLTST  
(#109)**

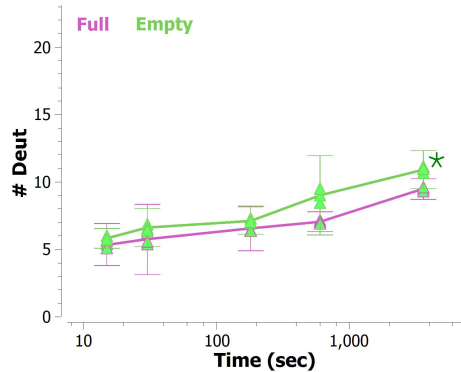

**AAV8\_VP1 320-345:  
NIQVKEVTQNEGTKTIANNLTSTIQV  
(#110)**

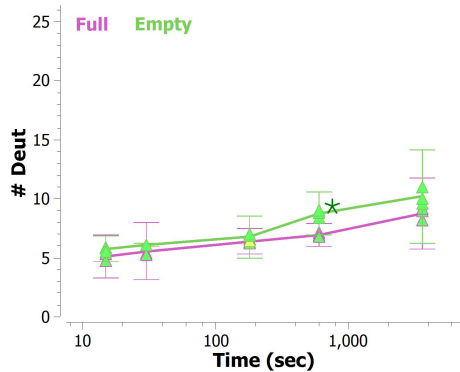

**AAV8\_VP1 320-346:  
NIQVKEVTQNEGTKTIANNLTSTIQVF  
(#111)**

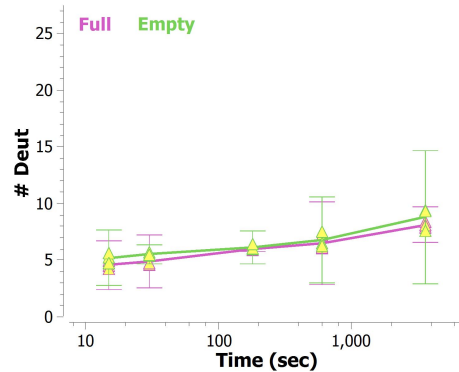

**AAV8\_VP1 320-350:  
QVKEVTQNEGTKTIANNLTSTIQVFTD  
(#112)**

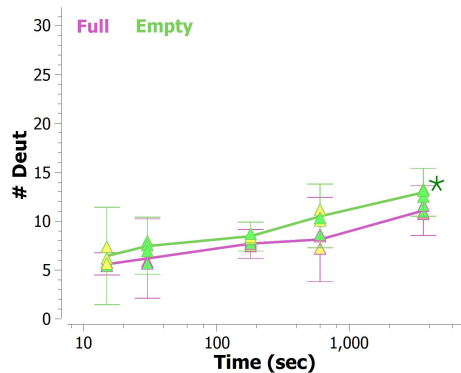

**AAV8\_VP1 321-342:  
IQVKEVTQNEGTKTIANNLTST  
(#113)**

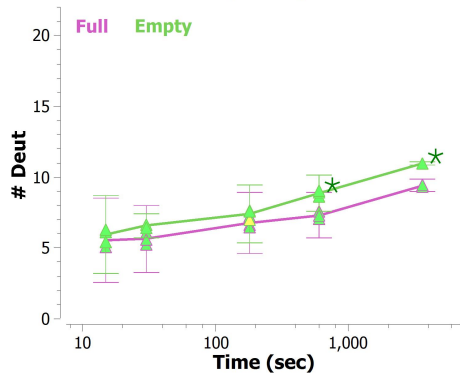

**AAV8\_VP1 321-345:  
IQVKEVTQNEGTKTIANNLTSTIQV  
(#114)**

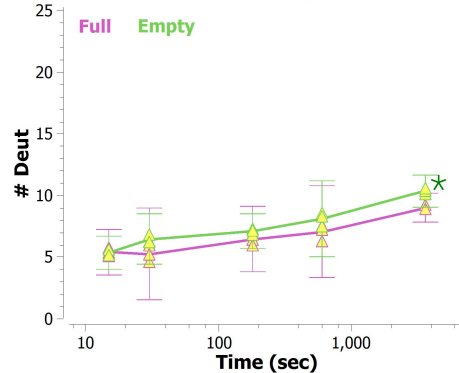

**AAV8\_VP1 323-339:  
VKEVTQNEGTKTIANNLTST  
(#115)**

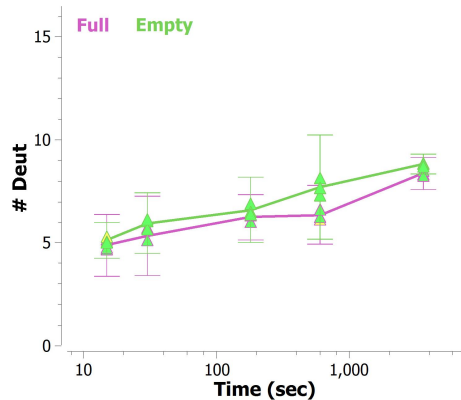

**AAV8\_VP1 323-342:  
VKEVTQNEGTKTIANNLTSTST  
(#116)**

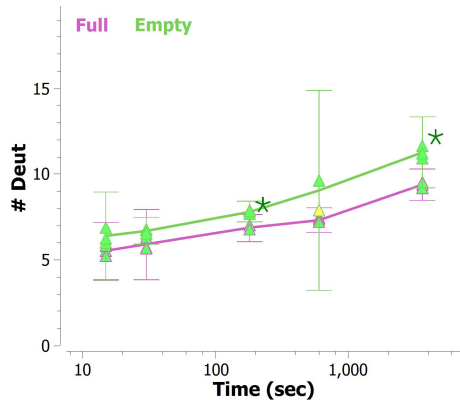

**AAV8\_VP1 323-344:  
VKEVTQNEGTKTIANNLTSTIQ  
(#117)**

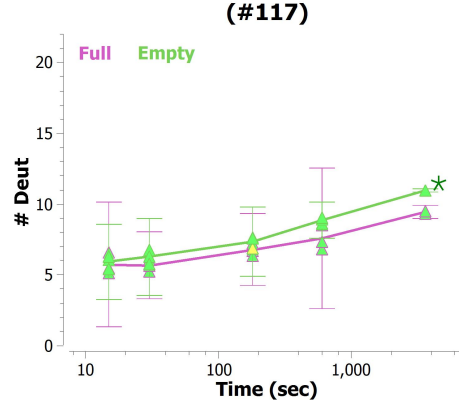

**AAV8\_VP1 323-345:  
VKEVTQNEGTKTIANNLTSTIQV  
(#118)**

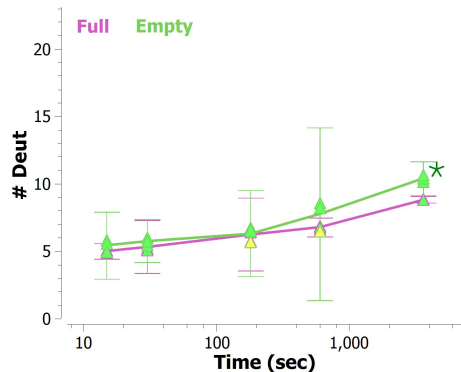

**AAV8\_VP1 323-346:  
VKEVTQNEGTKTIANNLTSTIQVF  
(#119)**

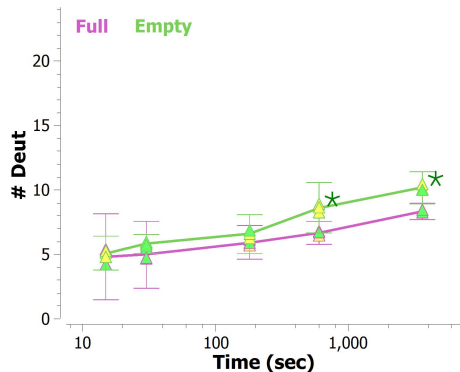

**AAV8\_VP1 323-350:  
/KEVTQNEGTKTIANNLTSTIQVFTDSE  
(#120)**

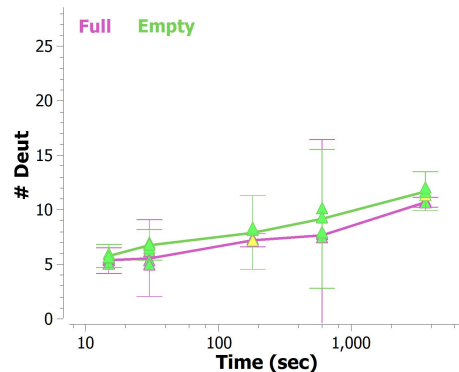

**AAV8\_VP1 324-339:  
KEVTQNEGKTIANNL (#121)**

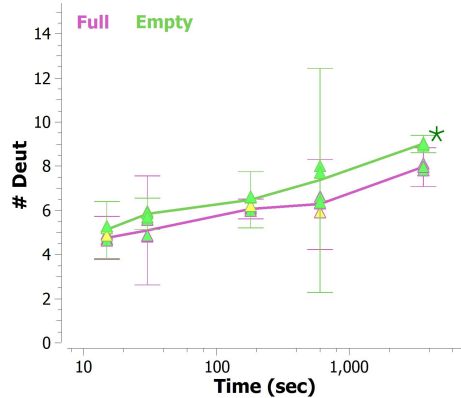

**AAV8\_VP1 324-342:  
KEVTQNEGKTIANNLST (#122)**

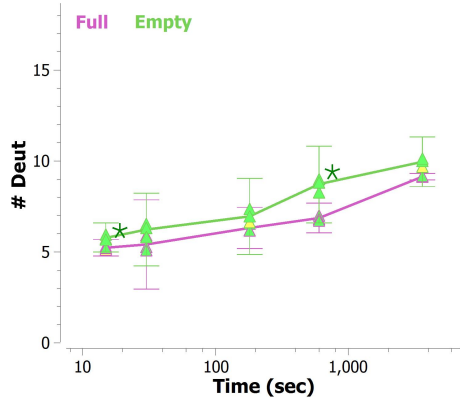

**AAV8\_VP1 324-345:  
KEVTQNEGKTIANNLSTIQV  
(#123)**

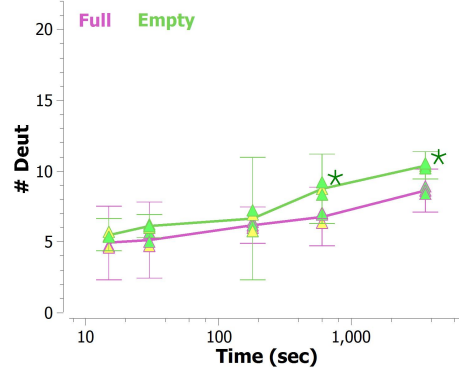

**AAV8\_VP1 324-346:  
KEVTQNEGKTIANNLSTIQVF  
(#124)**

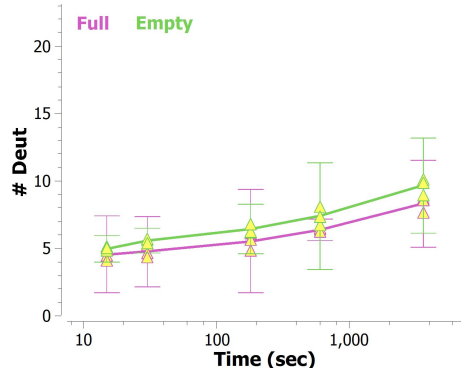

**AAV8\_VP1 326-345:  
VTQNEGKTIANNLSTIQV (#125)**

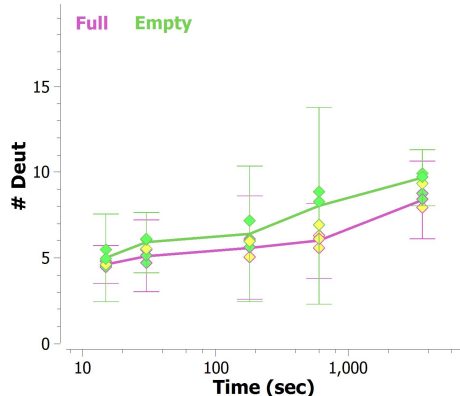

**AAV8\_VP1 326-350:  
VTQNEGKTIANNLSTIQVFTDSE  
(#126)**

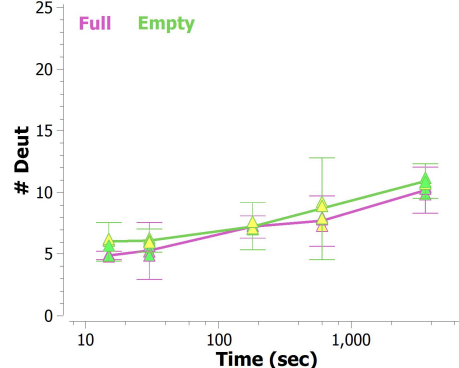

**AAV8\_VP1 330-342:  
EGTKTIANNLST (#127)**

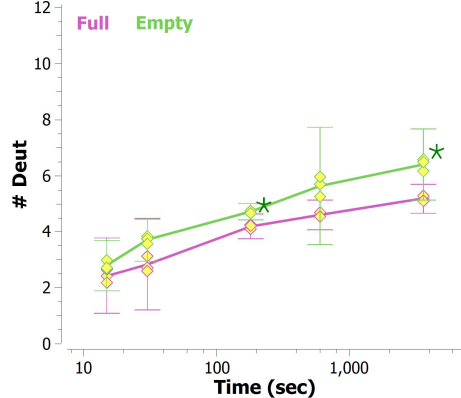

**AAV8\_VP1 335-339: IANNL  
(#128)**

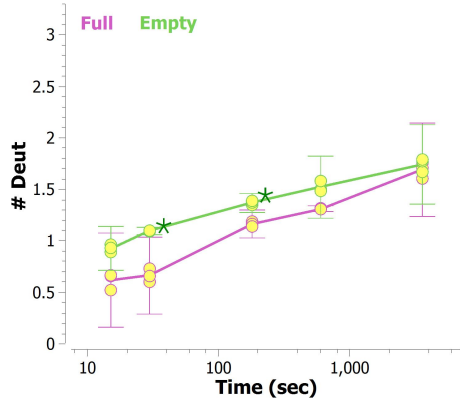

**AAV8\_VP1 340-345: TSTIQV  
(#129)**

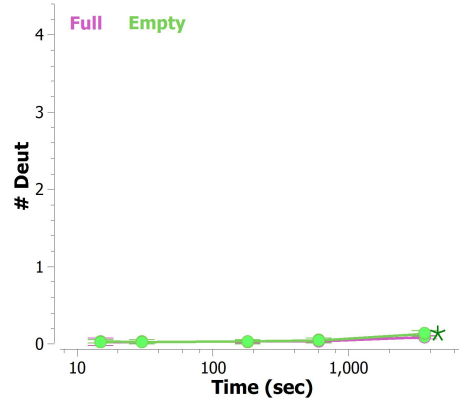

**AAV8\_VP1 340-346: TSTIQVF  
(#130)**

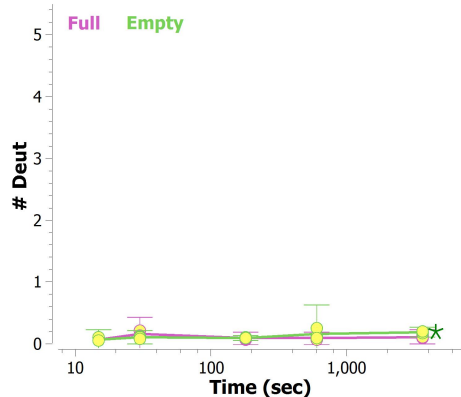

**AAV8\_VP1 340-350: TSTIQVFTDSE  
(#131)**

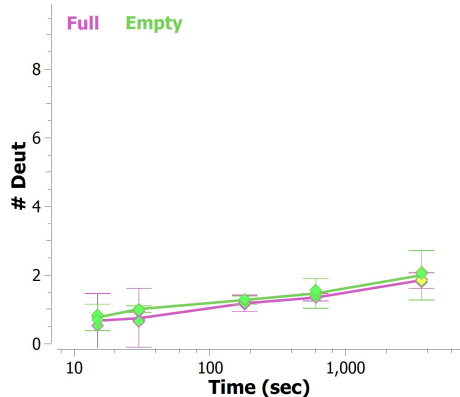

**AAV8\_VP1 343-346: IQVF (#132)**

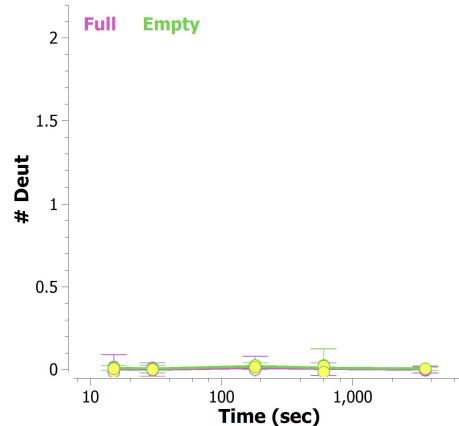

**AAV8\_VP1 343-347: IQVFT  
(#133)**

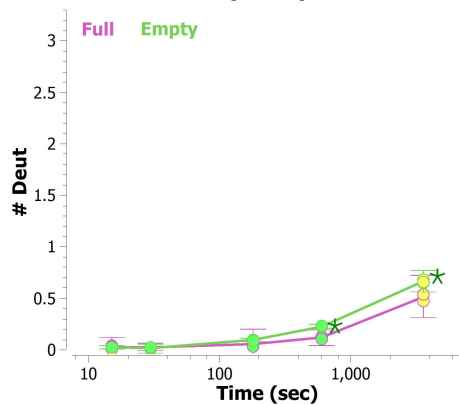

**AAV8\_VP1 343-349: IQVFTDS  
(#134)**

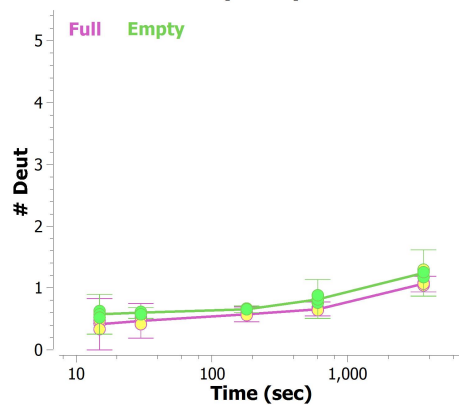

**AAV8\_VP1 343-350: IQVFTDSE**  
**(#135)**

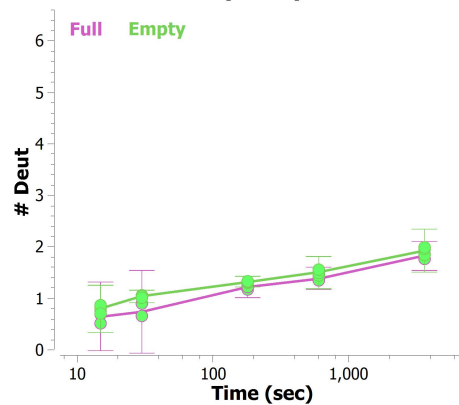

**AAV8\_VP1 351-357: YQLPYVL  
(#136)**

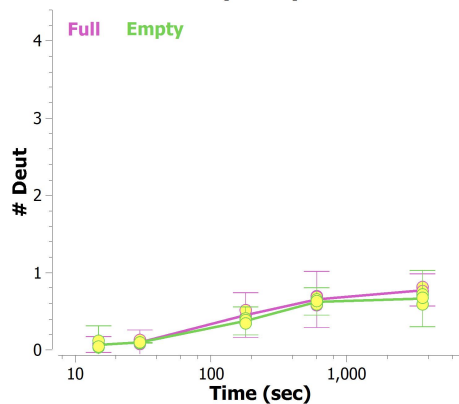

**AAV8\_VP1 351-358: YQLPYVLG**  
**(#137)**

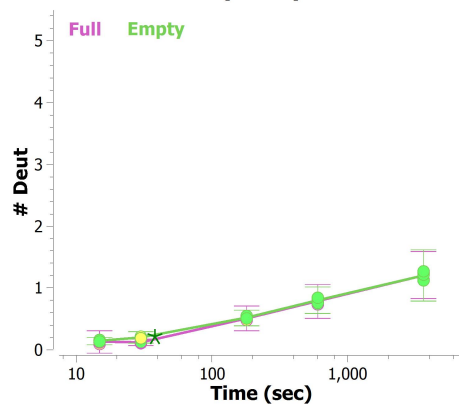

**AAV8\_VP1 351-360: YQLPYVLGSA**  
**(#138)**

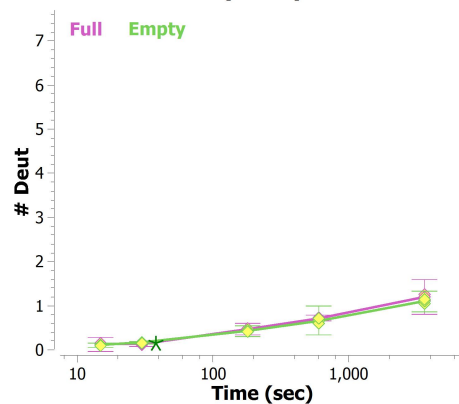

**AAV8\_VP1 351-371:  
YQLPYVLGSAHQGCLPPFPAD  
(#139)**

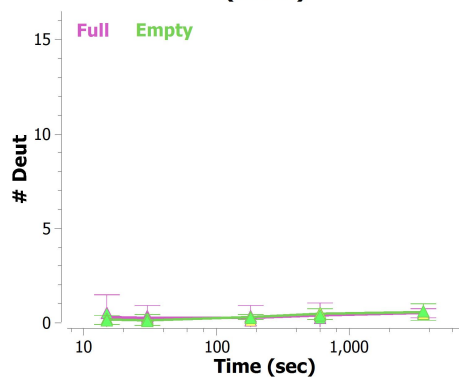

**AAV8\_VP1 351-373:**  
**YQLPYVLGSAHQGCLPPFPADV**  
**(#140)**

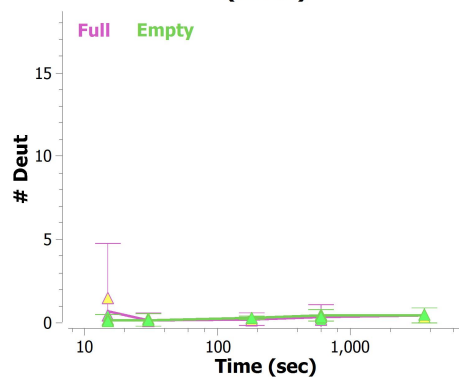

**AAV8\_VP1 372-379: VFMIPQYG**  
**(#141)**

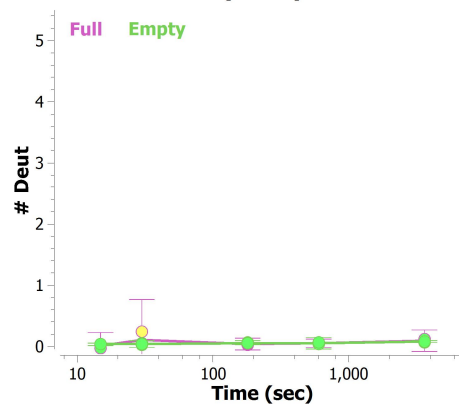

**AAV8\_VP1 372-380: VFMIPQYGY**  
**(#142)**

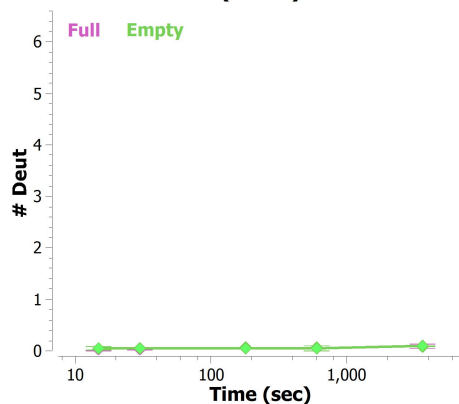

**AAV8\_VP1 372-381: VFMIPQYGYL**  
**(#143)**

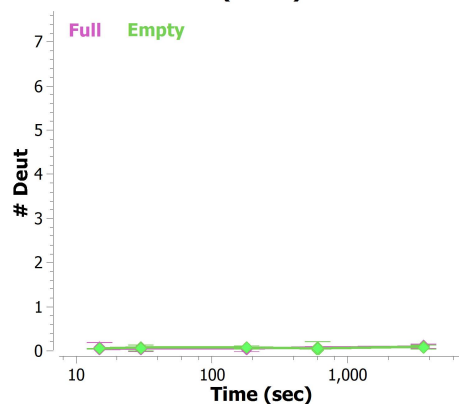

**AAV8\_VP1 373-379: FMIPQYG**  
**(#144)**

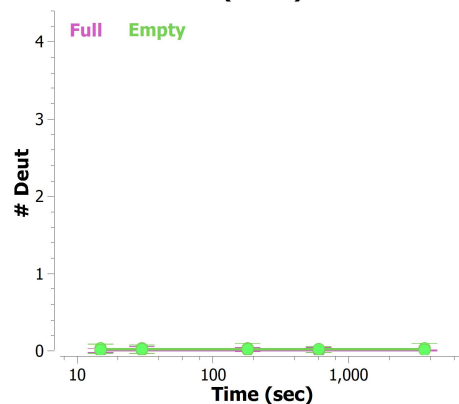



**AAV8\_VP1 373-380: FMIPQYGY (#145)**

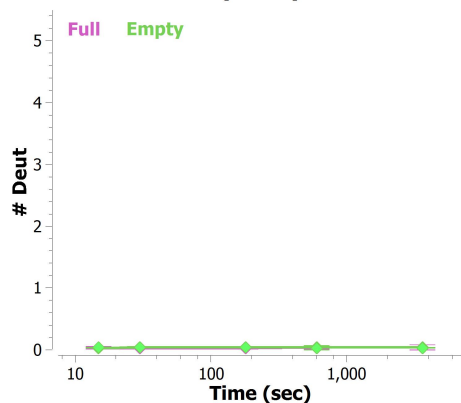

**AAV8\_VP1 373-381: FMIPQYGYL (#146)**

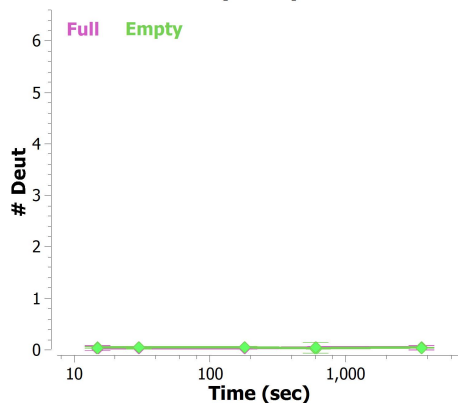

**AAV8\_VP1 373-388: FMIPQYGYLTLNNGSQ (#147)**

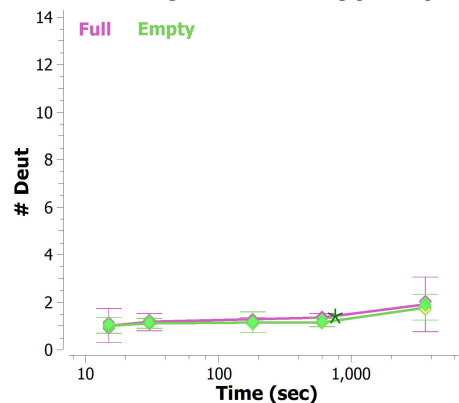

**AAV8\_VP1 374-380: MIPQYGY (#148)**

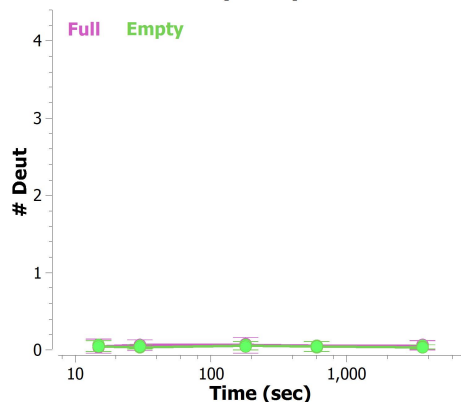

**AAV8\_VP1 374-381: MIPQYGYL (#149)**

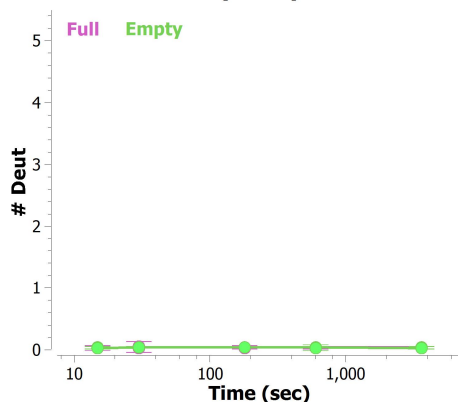

**AAV8\_VP1 374-383: MIPQYGYLTL (#150)**

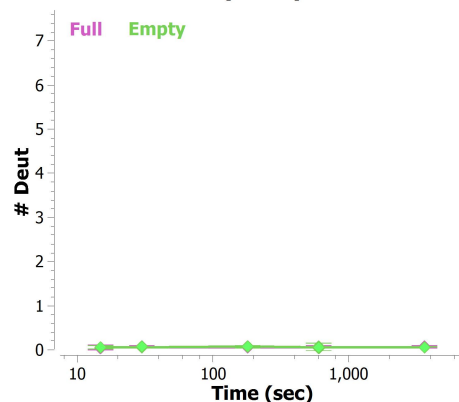

**AAV8\_VP1 374-388: MIPQYGYLTLNNGSQ (#151)**

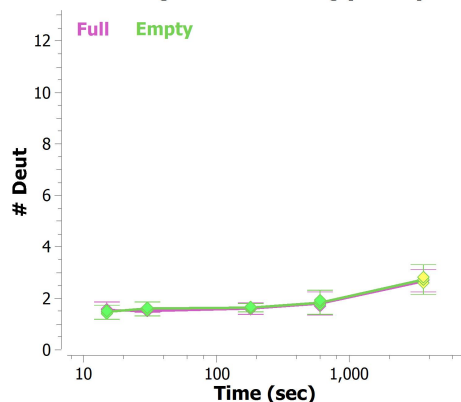

**AAV8\_VP1 374-395: MIPQYGYLTLNNGSQAVGRSSF (#152)**

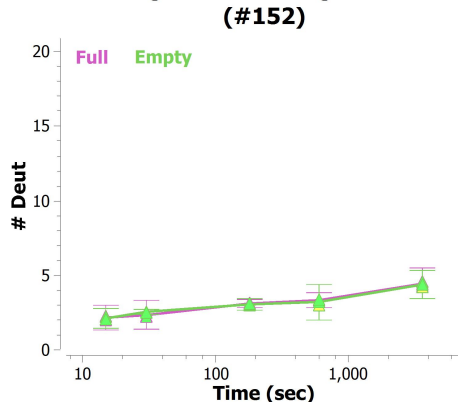

**AAV8\_VP1 375-383: IPQYGYLTL (#153)**

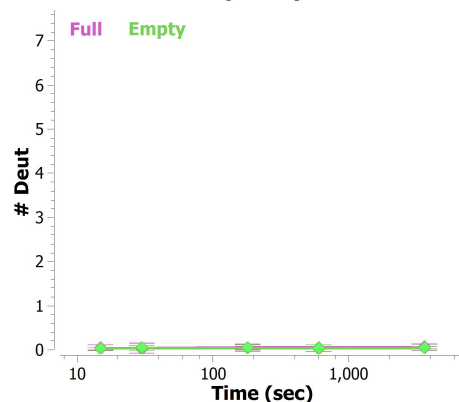

**AAV8\_VP1 375-395: IPQYGYLTLNNGSQAVGRSSF (#154)**

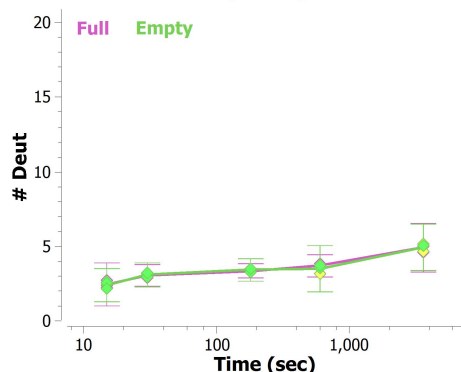

**AAV8\_VP1 376-380: PQYGY (#155)**

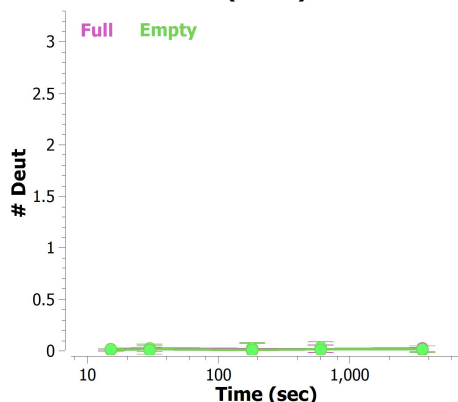

**AAV8\_VP1 380-395: YLTLNNGSQAVGRSSF (#156)**

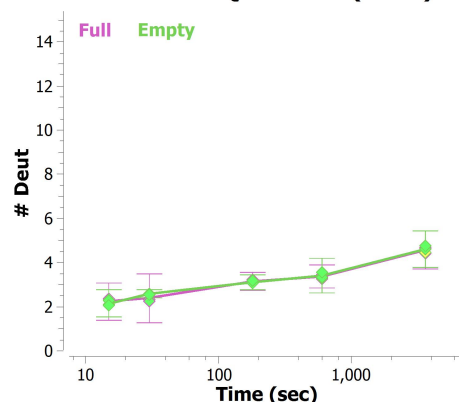

**AAV8\_VP1 381-388: LTLNNGSQ (#157)**

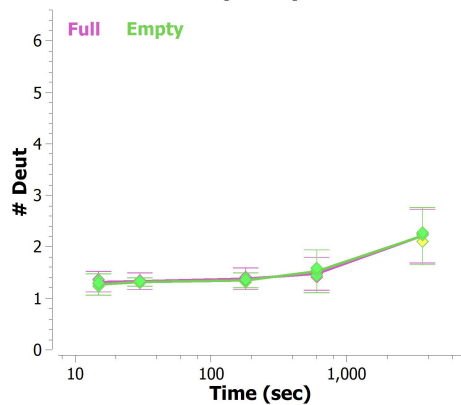

**AAV8\_VP1 381-395: LTLNNGSQAVGRSSF (#158)**

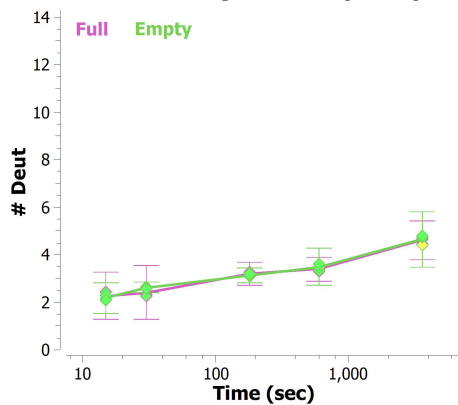

**AAV8\_VP1 382-388: TLNNGSQ (#159)**

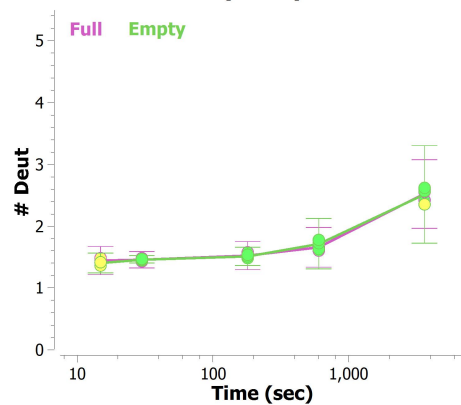

**AAV8\_VP1 382-395: TLNNGSQAVGRSSF (#160)**

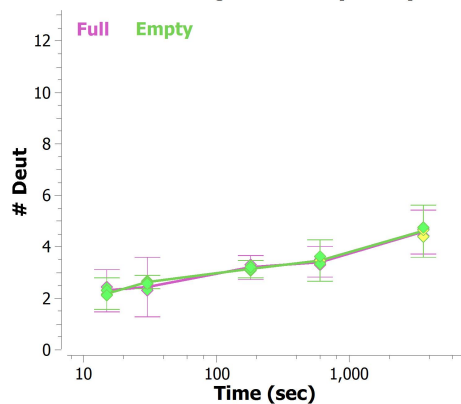

**AAV8\_VP1 384-395: NNGSQAVGRSSF (#161)**

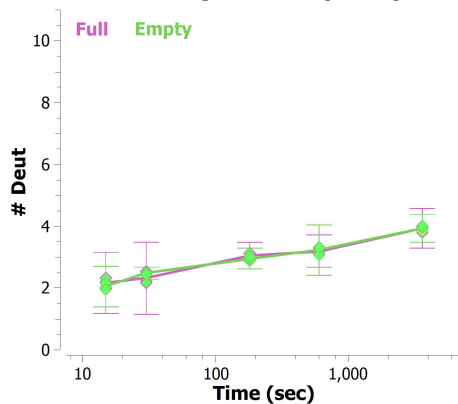

**AAV8\_VP1 389-395: AVGRSSF (#162)**

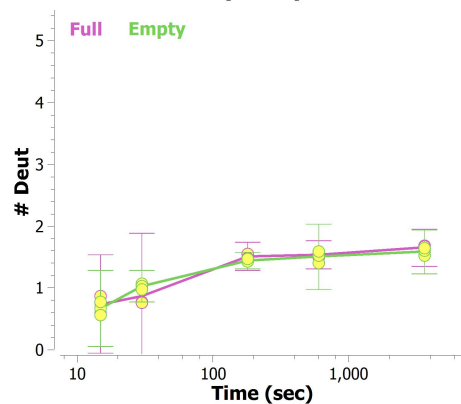

**AAV8\_VP1 390-395: VGRSSF (#163)**

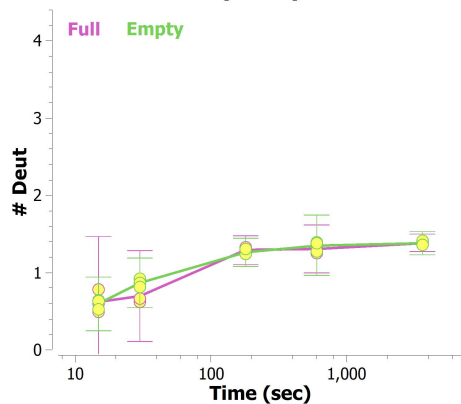

**AAV8\_VP1 396-399: YCLE (#164)**

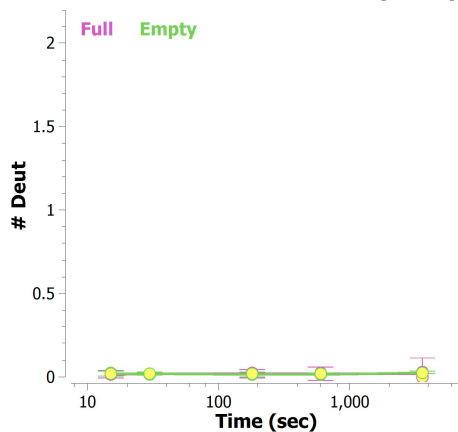

**AAV8\_VP1 396-405: YCLEYFPSQM (#165)**

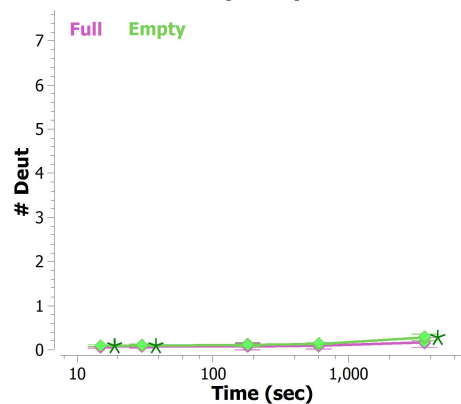

**AAV8\_VP1 396-411: YCLEYFPSQMLRTGNN (#166)**

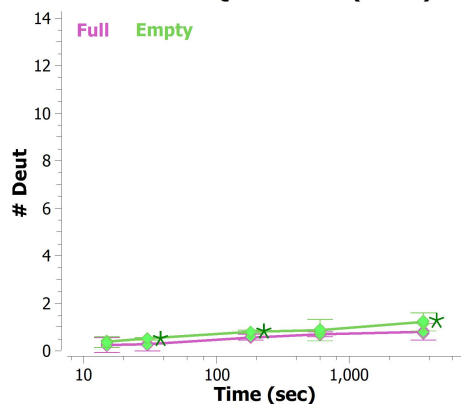

**AAV8\_VP1 397-405: CLEYFPSQM (#167)**

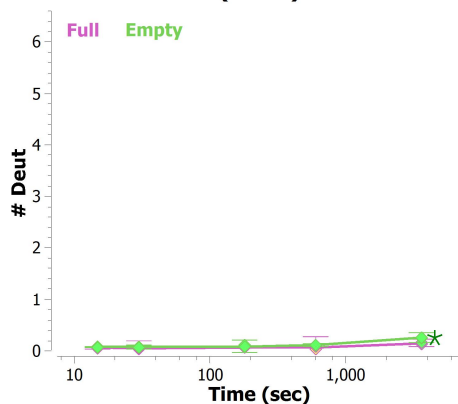

**AAV8\_VP1 399-404: EYFPSQ (#168)**

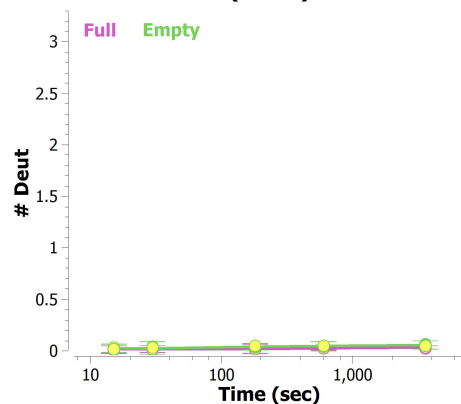

**AAV8\_VP1 399-405: EYFPSQM  
(#169)**

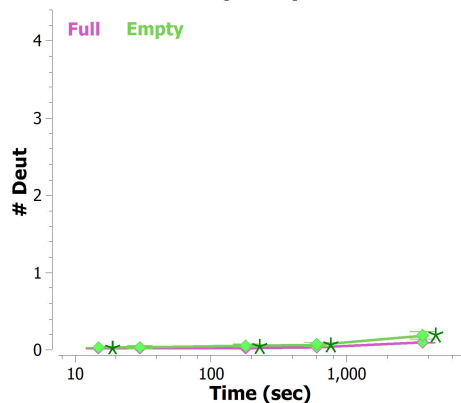

**AAV8\_VP1 399-411: EYFPSQMLRTGNN (#170)**

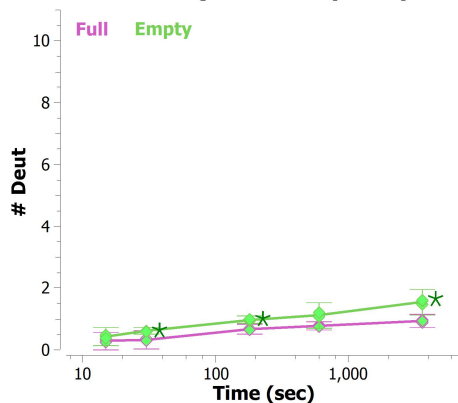

**AAV8\_VP1 400-405: YFPSQM  
(#171)**

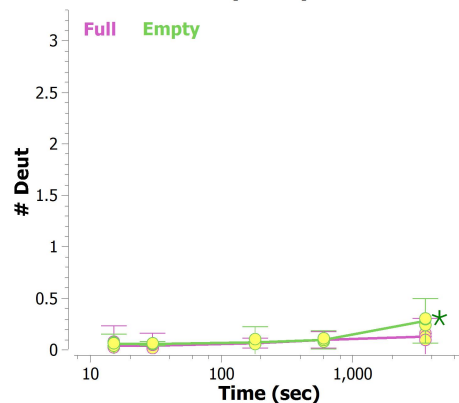

**AAV8\_VP1 405-411: MLRTGNN (#172)**

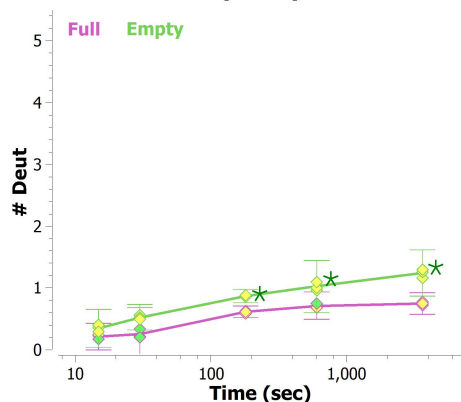

**AAV8\_VP1 405-413: MLRTGNNFQ (#173)**

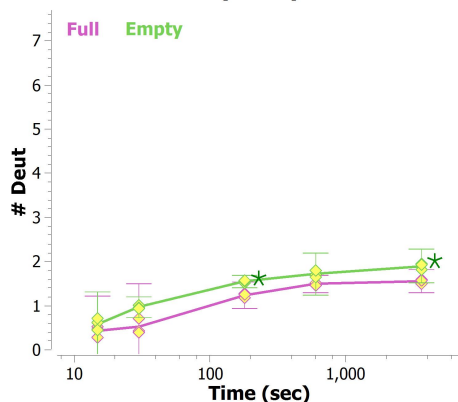

**AAV8\_VP1 406-411: LRTGNN (#174)**

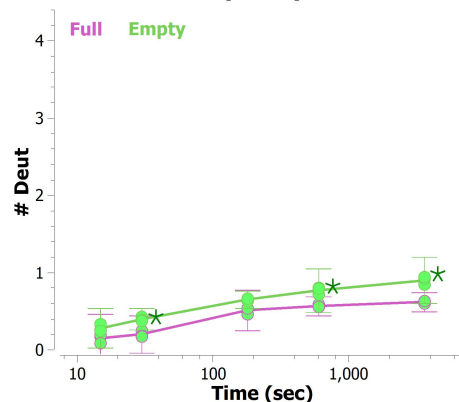

**AAV8\_VP1 406-412: LRTGNNF (#175)**

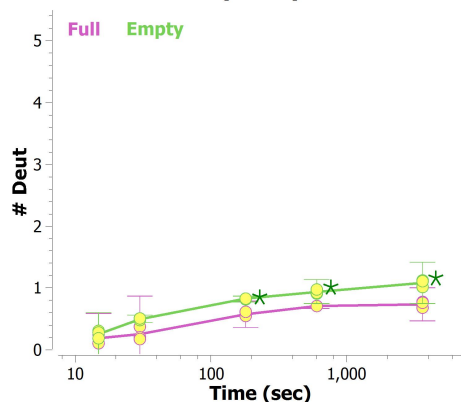

**AAV8\_VP1 406-413: LRTGNNFQ (#176)**

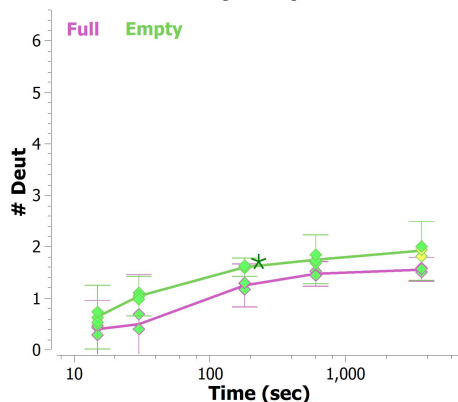

**AAV8\_VP1 406-415: LRTGNNFQFT (#177)**

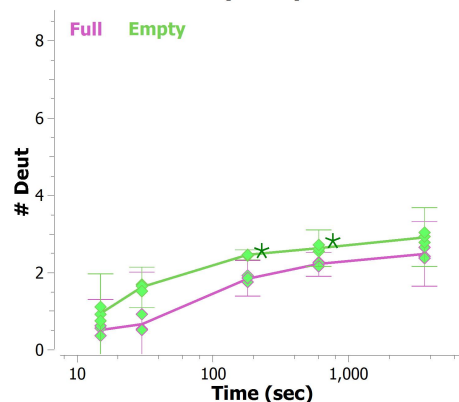

**AAV8\_VP1 406-417: LRTGNNFQFTYT (#178)**

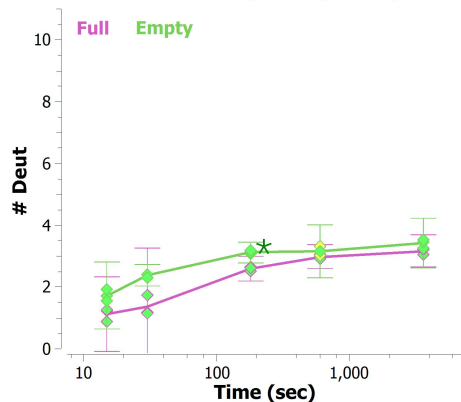

**AAV8\_VP1 412-417: FQFTYT (#179)**

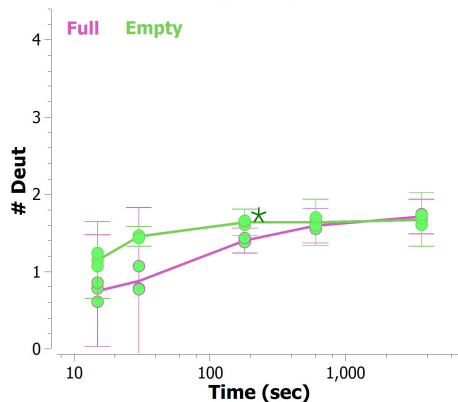

**AAV8\_VP1 412-418: FQFTYTF (#180)**

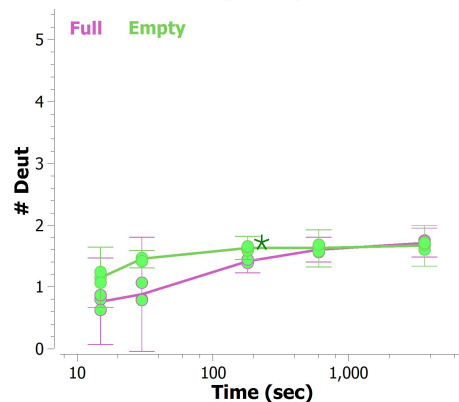

**AAV8\_VP1 412-419: FQFTYTFE**  
**(#181)**

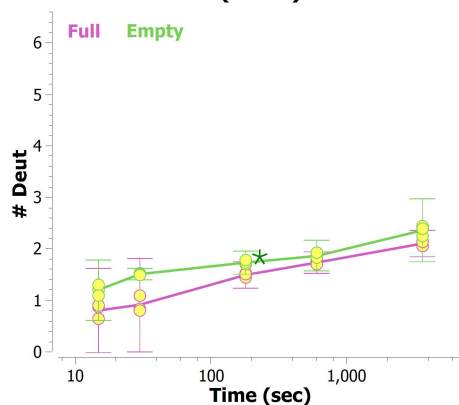

**AAV8\_VP1 414-418: FTYTF**  
**(#182)**

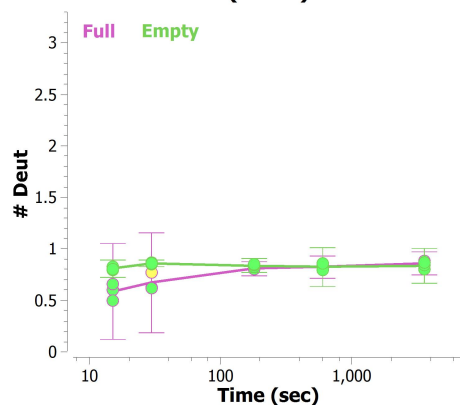

**AAV8\_VP1 414-433:  
FTYTFEDVPFHSSYAHSQSL (#183)**

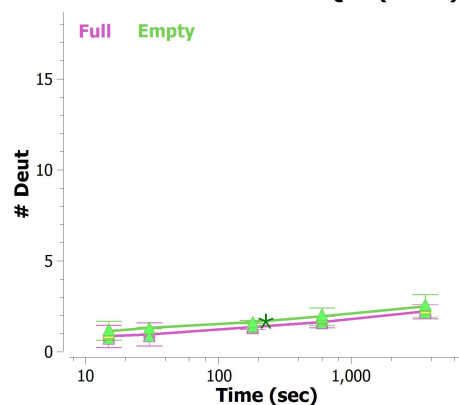

**AAV8\_VP1 415-433:**  
**TYTFEDVPFHSSYAHSQSL (#184)**

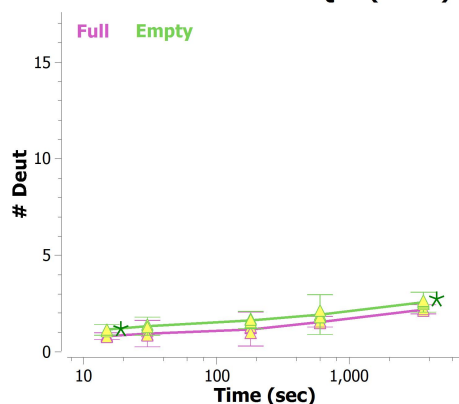

**AAV8\_VP1 416-433:**  
**YTFEDVPFHSSYAHSQSL (#185)**

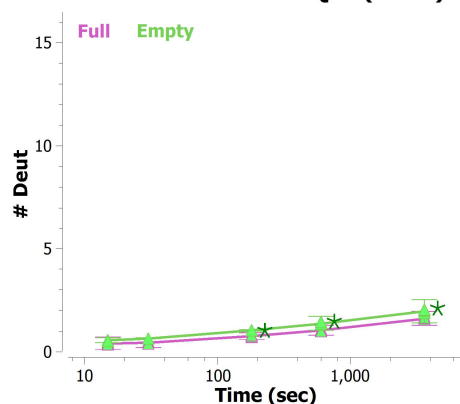

**AAV8\_VP1 418-426: FEDVPFHSS  
(#186)**

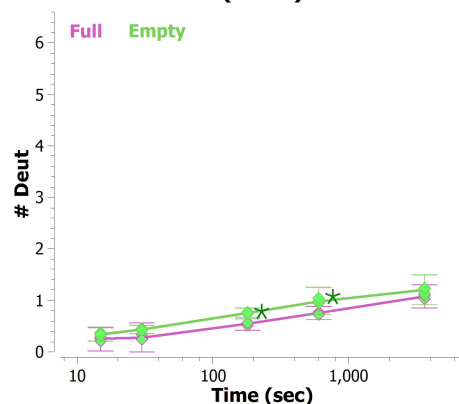

**AAV8\_VP1 418-428: FEDVPFHSSYA**  
**(#187)**

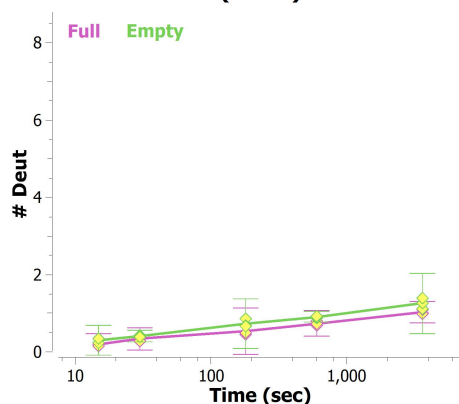

**AAV8\_VP1 418-430:  
FEDVPFHSSYAHS (#188)**

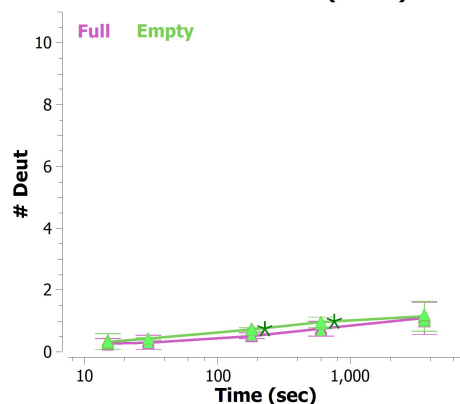

**AAV8\_VP1 418-433:**  
**FEDVPFHSSYAHSQSL (#189)**

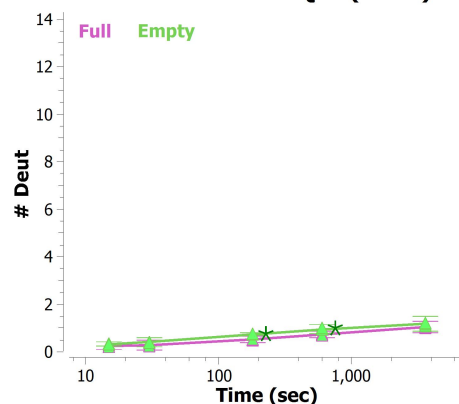

**AAV8\_VP1 418-434:  
FEDVPFHSSYAHSQSLD (#190)**

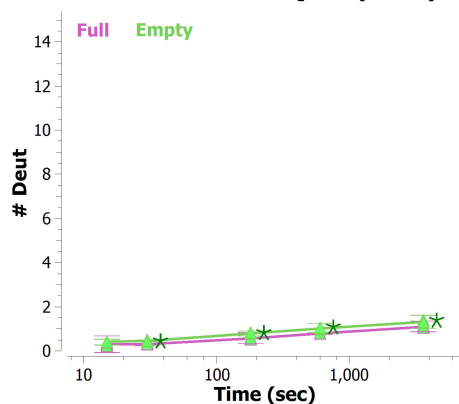

**AAV8\_VP1 419-430:  
EDVPFHSSYAHS (#191)**

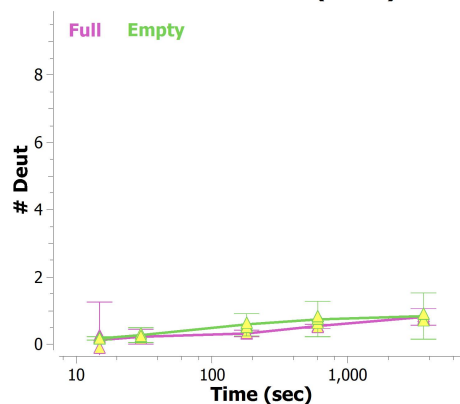

**AAV8\_VP1 419-443:  
EDVPFHSSYAHSQSLDRLMNPLIDQ  
(#192)**

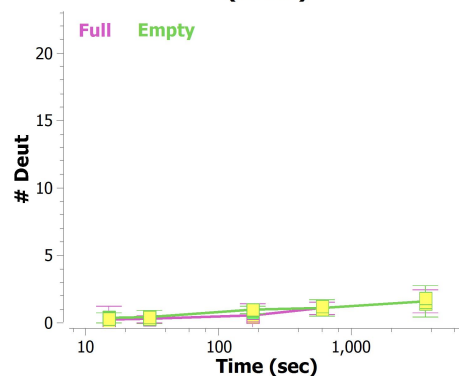

**AAV8\_VP1 420-433:  
DVPFHSSYAHSQSL (#193)**

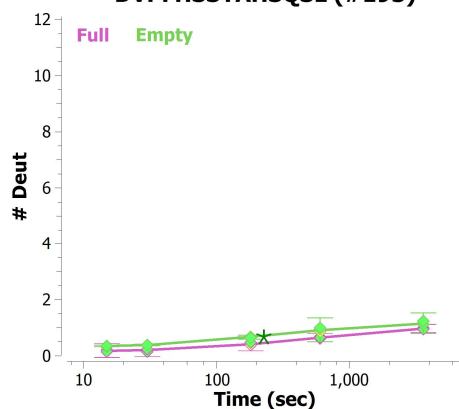

**AAV8\_VP1 427-433: YAHSQSL  
(#194)**

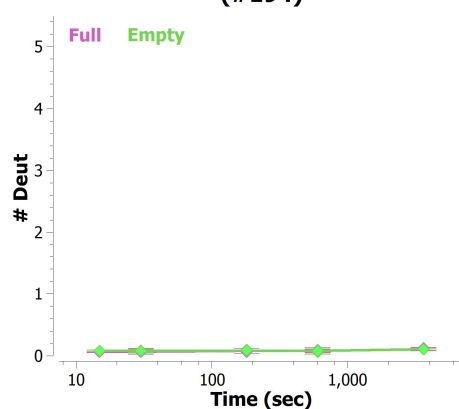

**AAV8\_VP1 427-443:  
YAHSQSLDRLMNPLIDQ (#195)**

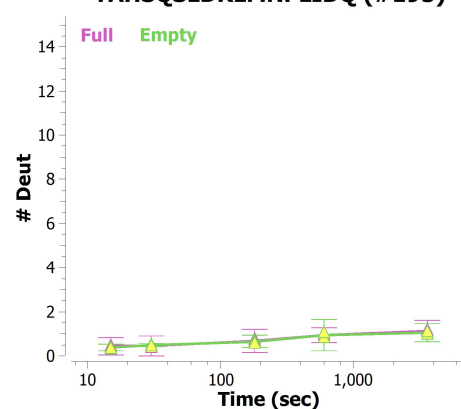

**AAV8\_VP1 429-433: HSQSL**  
**(#196)**

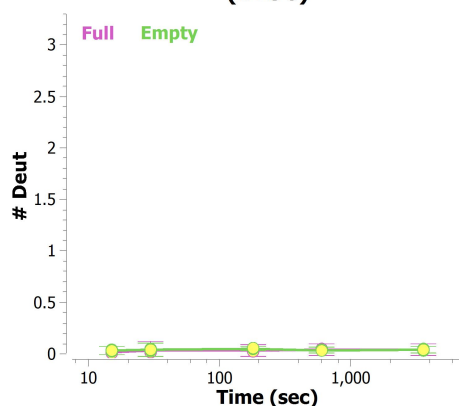

**AAV8\_VP1 434-442: DRLMNPLID  
(#197)**

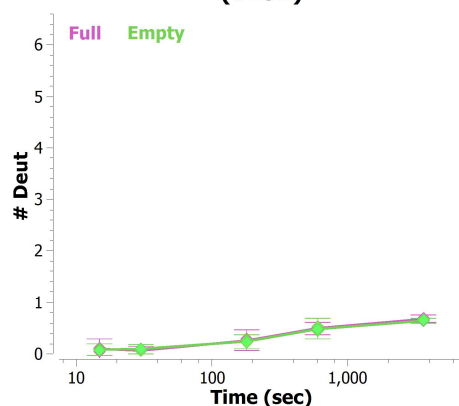

**AAV8\_VP1 434-443: DRLMNPLIDQ**  
**(#198)**

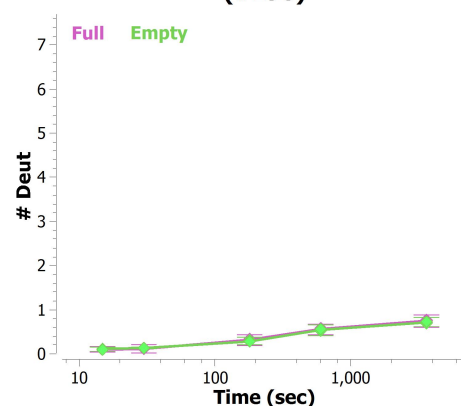

**AAV8\_VP1 434-444:  
DRLMNPLIDQY (#199)**

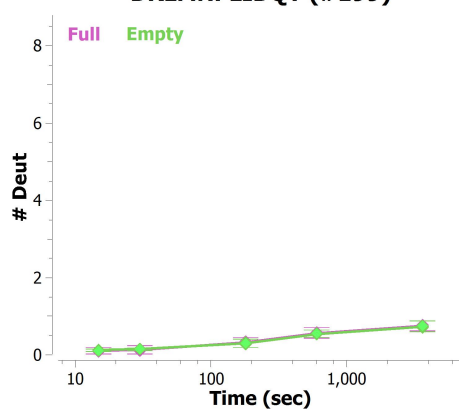

**AAV8\_VP1 434-445:  
DRLMNPLIDQYL (#200)**

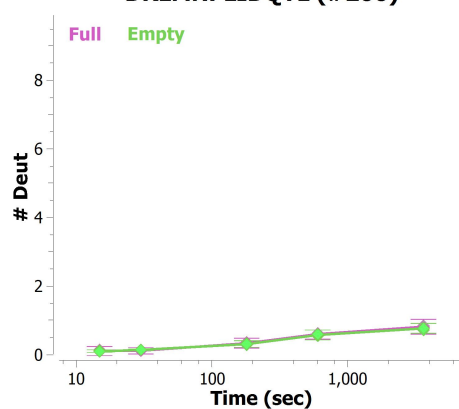

**AAV8\_VP1 434-446:  
DRLMNPLIDQYLY (#201)**

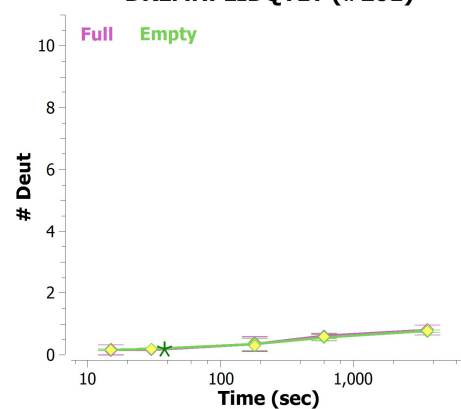

**AAV8\_VP1 434-447:  
DRLMNPLIDQYLYY (#202)**

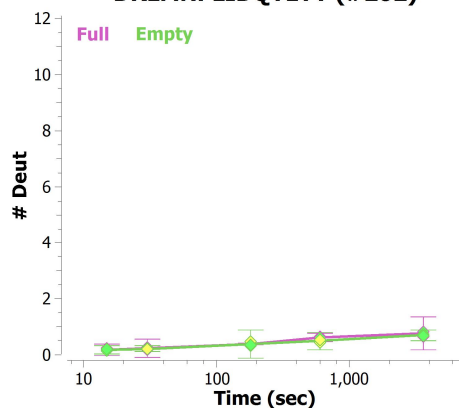

**AAV8\_VP1 435-445:  
RLMNPLIDQYL (#203)**

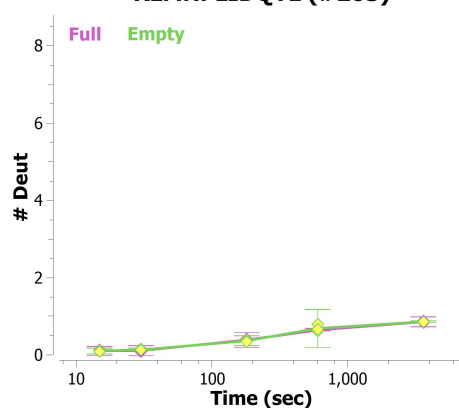

**AAV8\_VP1 437-445: MNPLIDQYL**  
**(#204)**

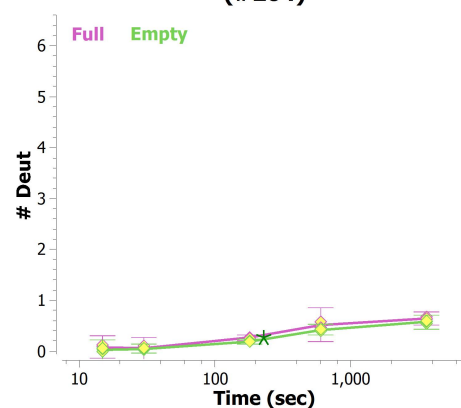

AAV8\_VP1 443-446: QYLY (#205)

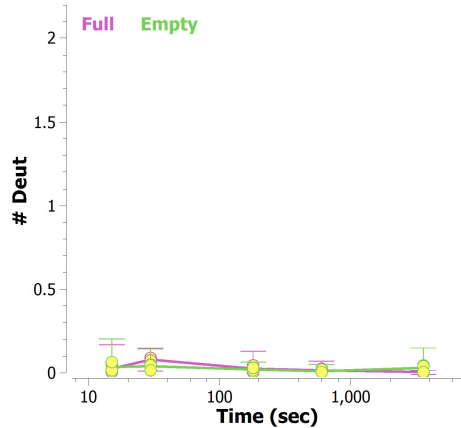

AAV8\_VP1 444-447: YLYY (#206)

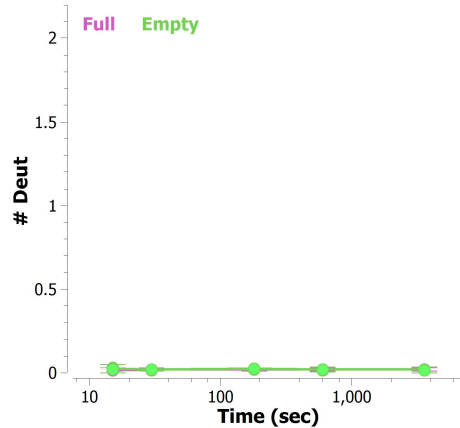AAV8\_VP1 444-460:  
YLYLSRTQTGGTANT (#207)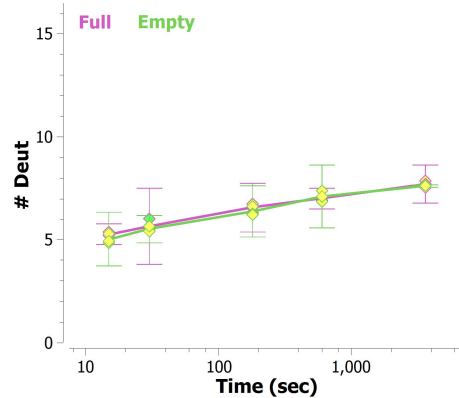AAV8\_VP1 446-453: YYLSRTQT  
(#208)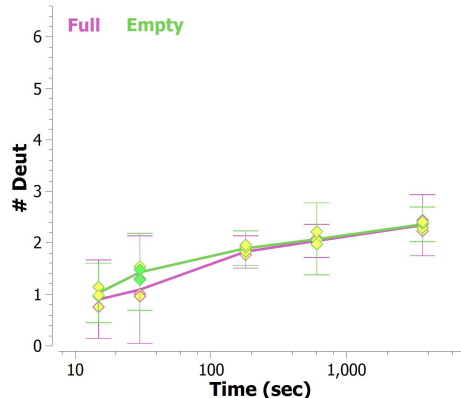AAV8\_VP1 446-460:  
YYLSRTQTGGTANT (#209)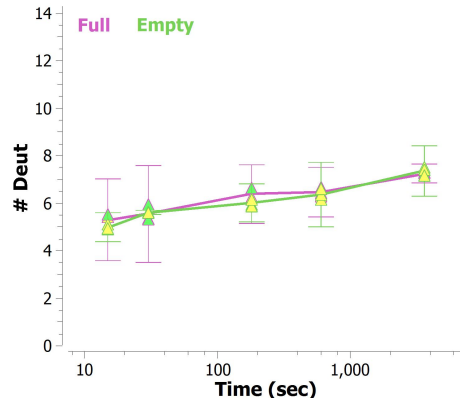AAV8\_VP1 446-462:  
YYLSRTQTGGTANTQT (#210)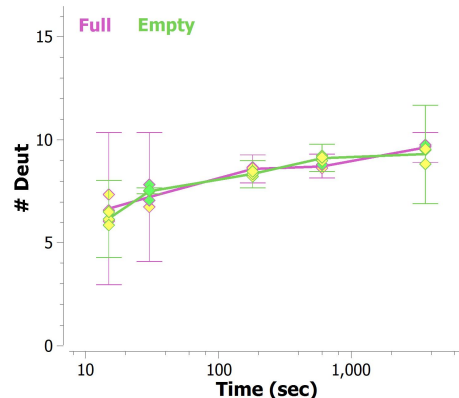AAV8\_VP1 446-464:  
YYLSRTQTGGTANTQTLG (#211)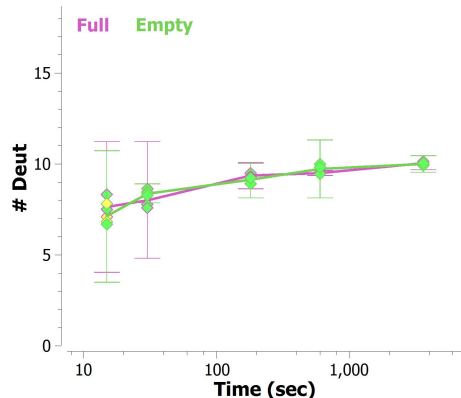AAV8\_VP1 446-465:  
YYLSRTQTGGTANTQTLGF (#212)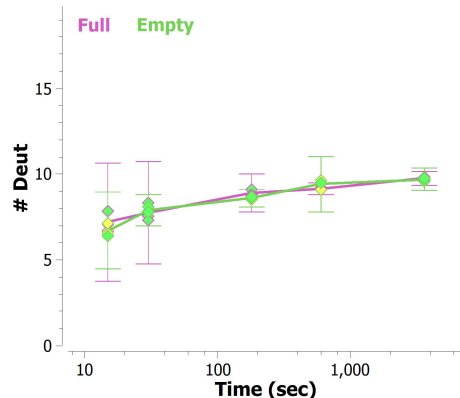AAV8\_VP1 447-460:  
YLSRTQTGGTANT (#213)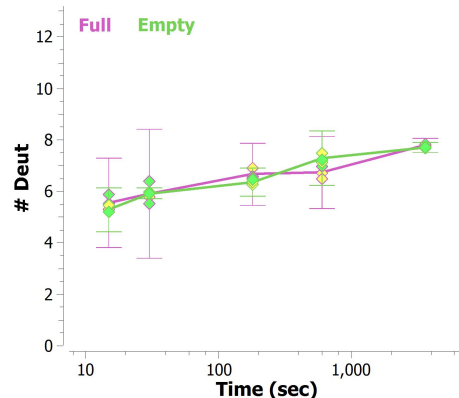AAV8\_VP1 447-464:  
YLSRTQTGGTANTQTLG (#214)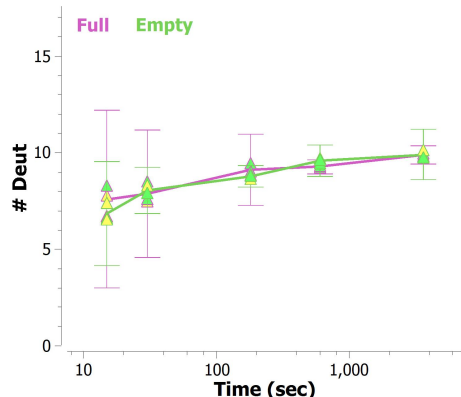AAV8\_VP1 447-465:  
YLSRTQTGGTANTQTLGF (#215)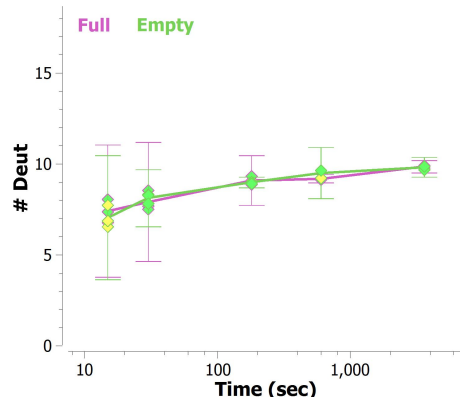AAV8\_VP1 448-460:  
LSRTQTGGTANT (#216)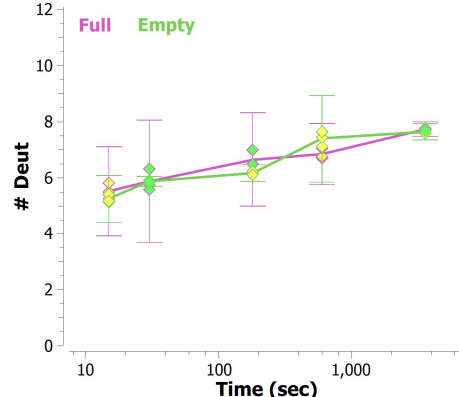

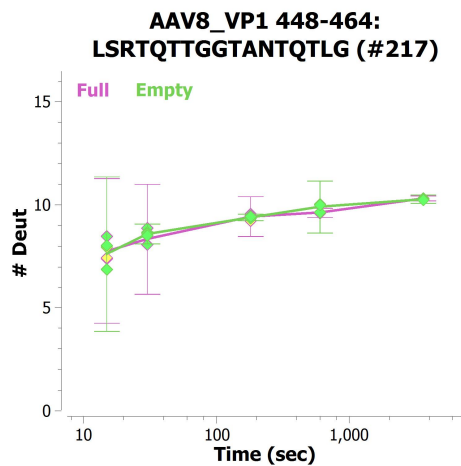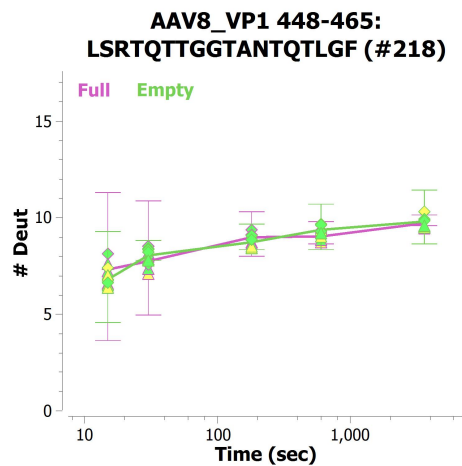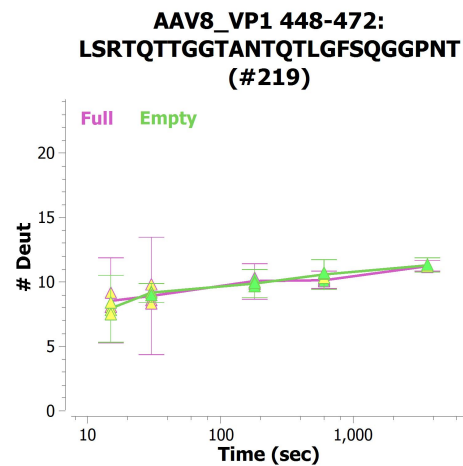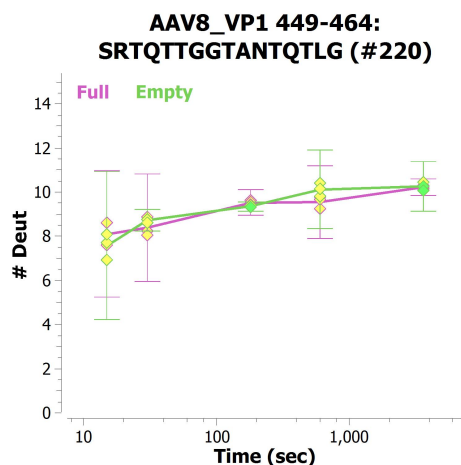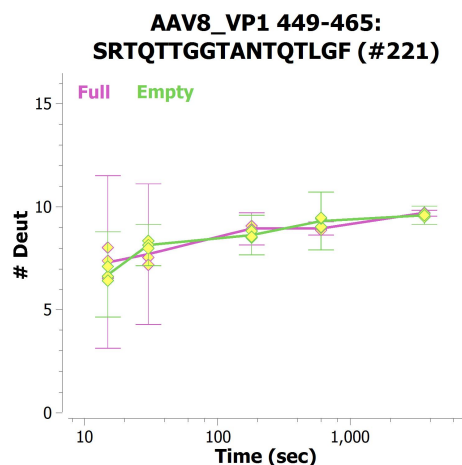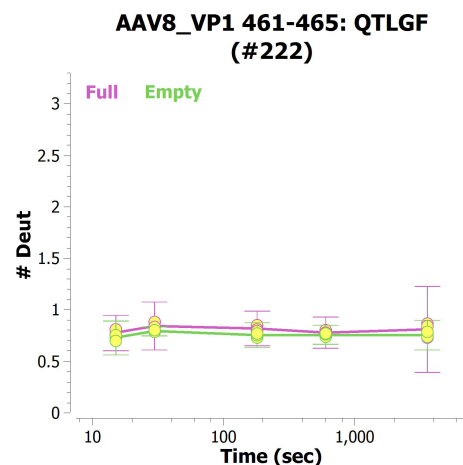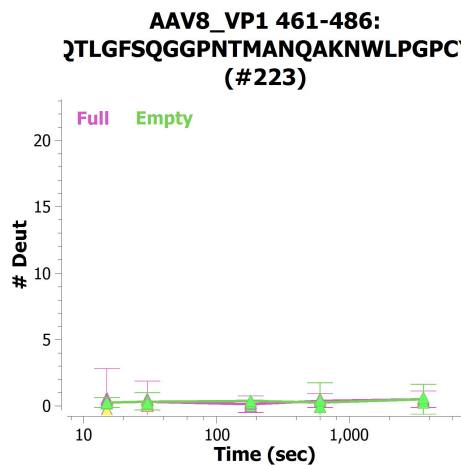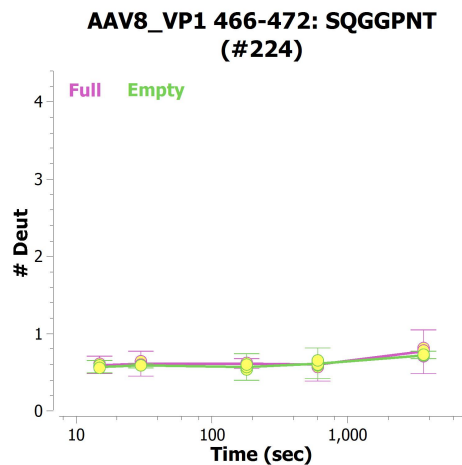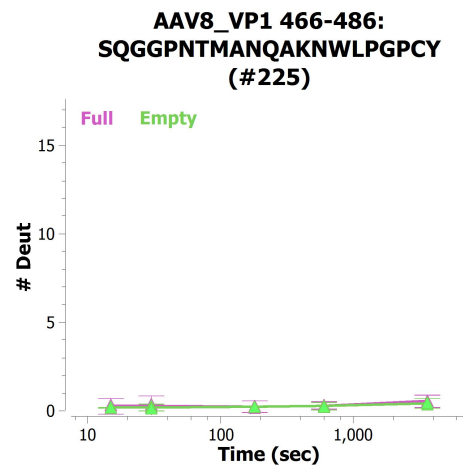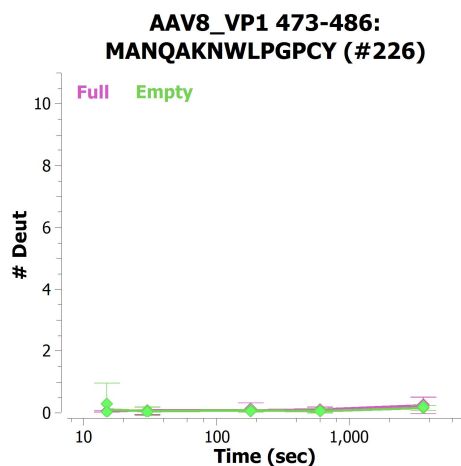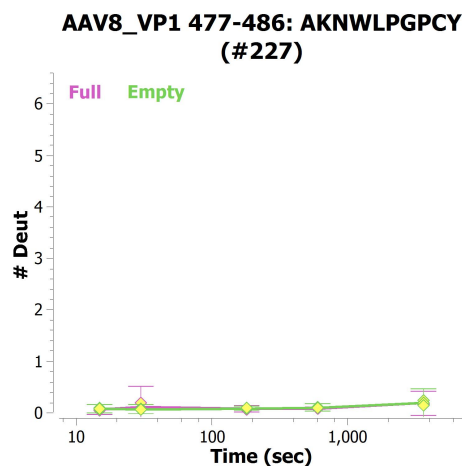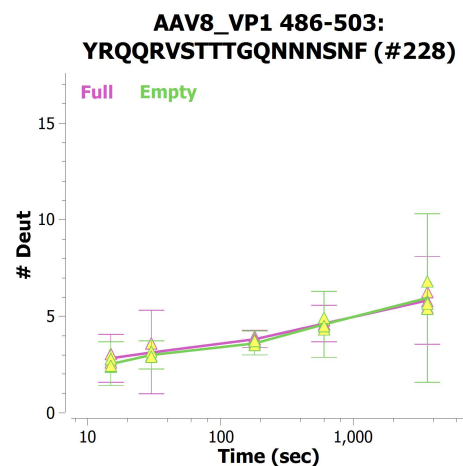



**AAV8\_VP1 487-504:  
RQQRVSTTTGQNNNSNFA (#229)**

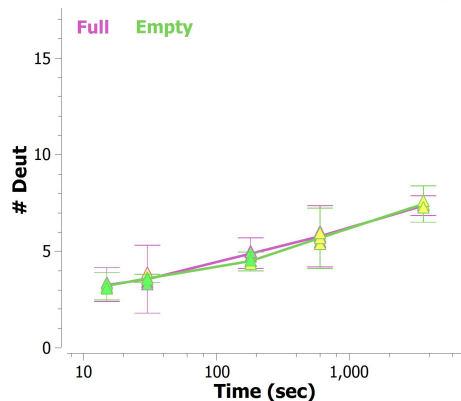

**AAV8\_VP1 494-503: TTGQNNNSNF  
(#230)**

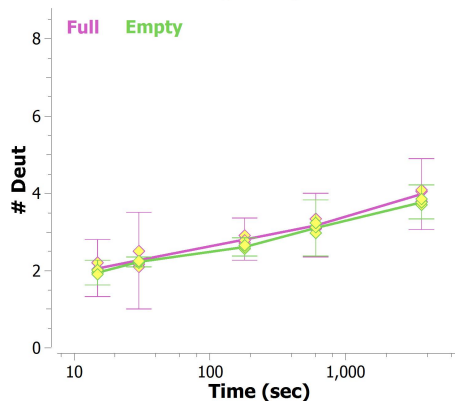

**AAV8\_VP1 503-525:  
FAWTAGTKYHLNGRNSLANPGIA  
(#231)**

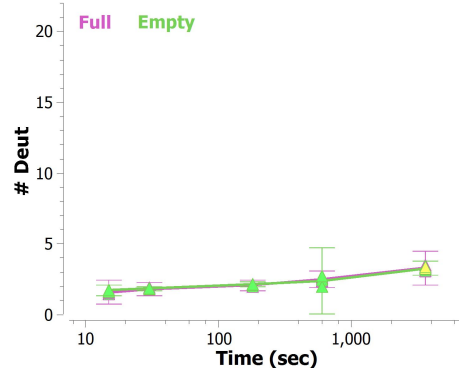

**AAV8\_VP1 504-511: AWTAGTKY  
(#232)**

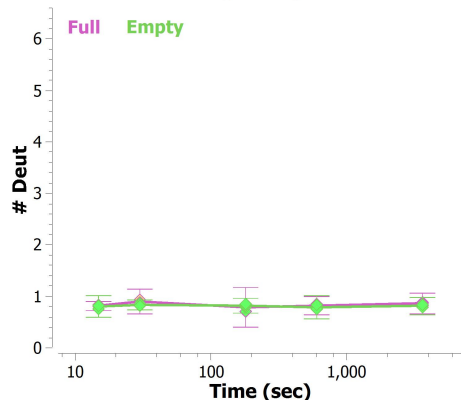

**AAV8\_VP1 504-513: AWTAGTKYHL  
(#233)**

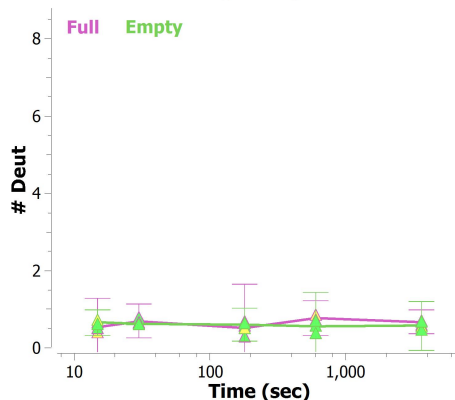

**AAV8\_VP1 504-517:  
AWTAGTKYHLNGRN (#234)**

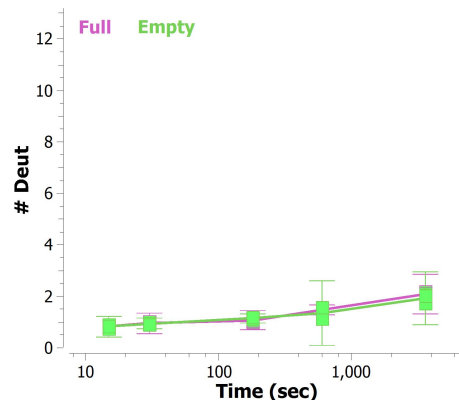

**AAV8\_VP1 504-525:  
AWTAGTKYHLNGRNSLANPGIA  
(#235)**

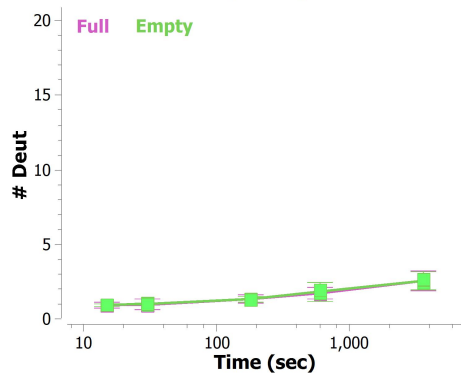

**AAV8\_VP1 504-526:  
AWTAGTKYHLNGRNSLANPGIAM  
(#236)**

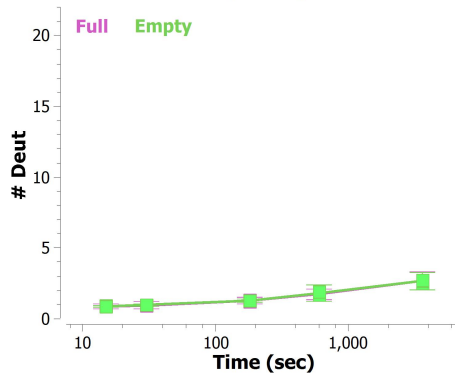

**AAV8\_VP1 504-533:  
TAGTKYHLNGRNSLANPGIAMATHKC  
(#237)**

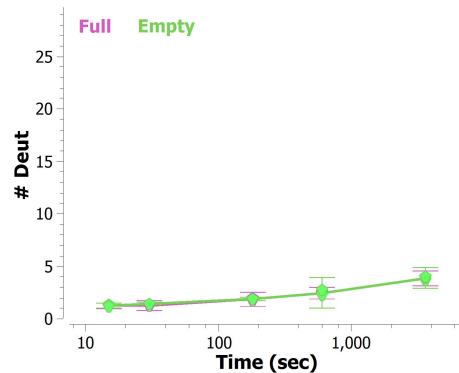

**AAV8\_VP1 504-534:  
TAGTKYHLNGRNSLANPGIAMATHKD  
(#238)**

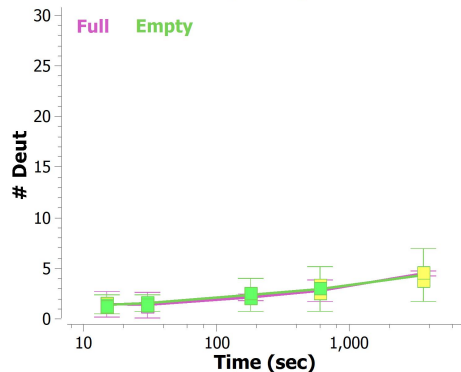

**AAV8\_VP1 505-517:  
WTAGTKYHLNGRN (#239)**

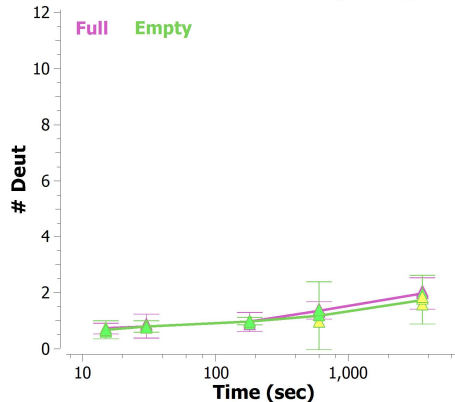

**AAV8\_VP1 505-525:  
WTAGTKYHLNGRNSLANPGIA  
(#240)**

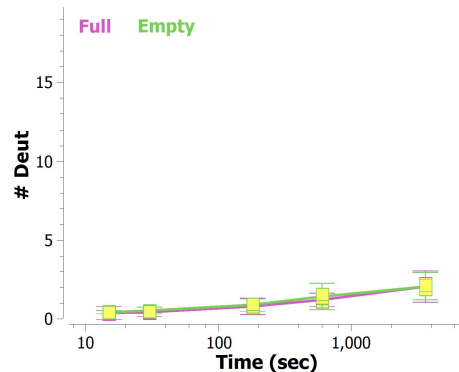

**AAV8\_VP1 506-517:  
TAGTKYHLNGRN (#241)**

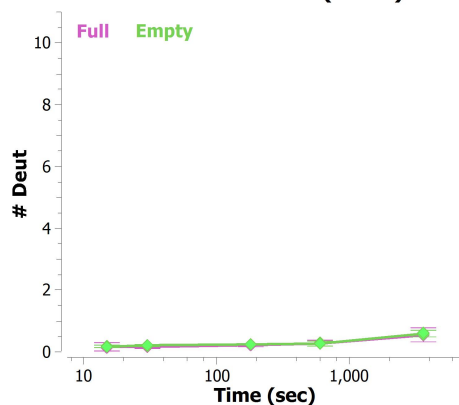

**AAV8\_VP1 507-517:  
AGTKYHLNGRN (#242)**

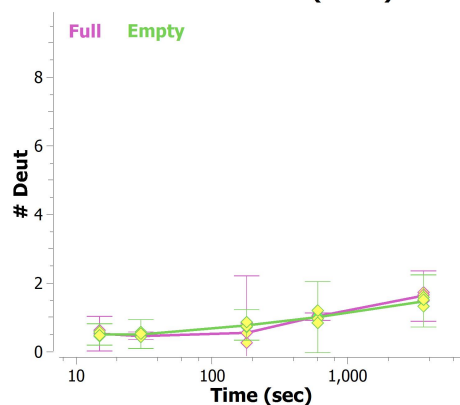

**AAV8\_VP1 512-525:  
HLNGRNSLANPGIA (#243)**

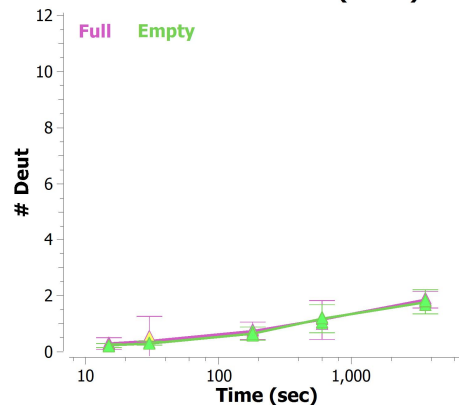

**AAV8\_VP1 512-526:  
HLNGRNSLANPGIAM (#244)**

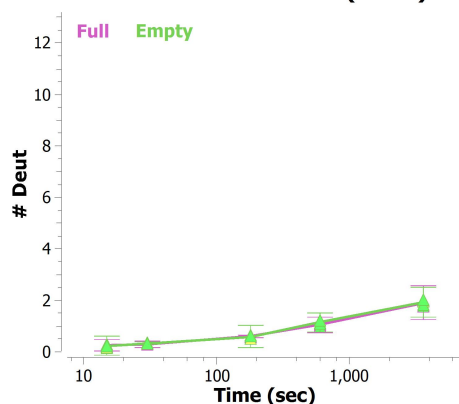

**AAV8\_VP1 518-525: SLANPGIA  
(#245)**

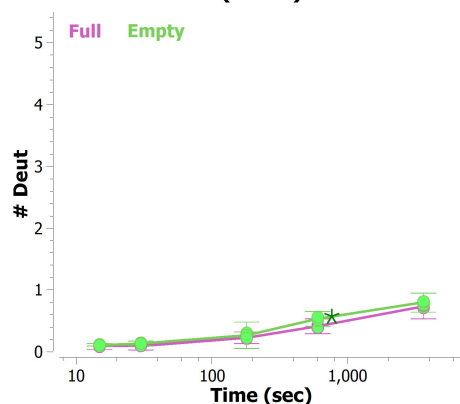

**AAV8\_VP1 518-526: SLANPGIAM  
(#246)**

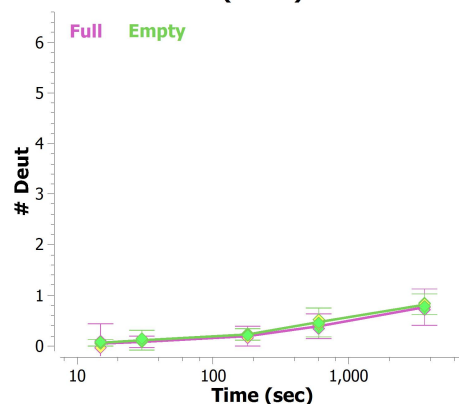

**AAV8\_VP1 518-533:  
SLANPGIAMATHKDDE (#247)**

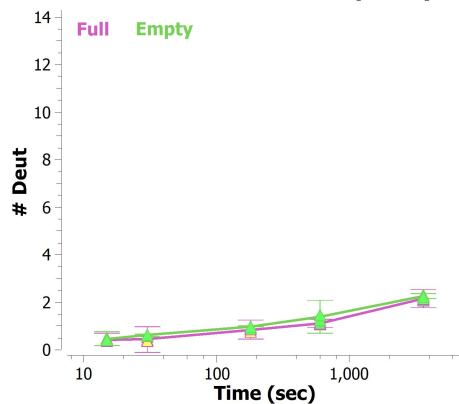

**AAV8\_VP1 526-533: MATHKDDE  
(#248)**

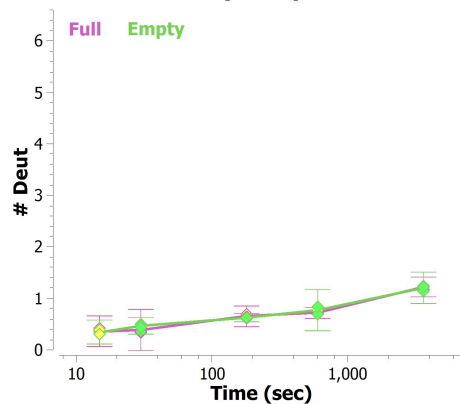

**AAV8\_VP1 526-534: MATHKDDEE  
(#249)**

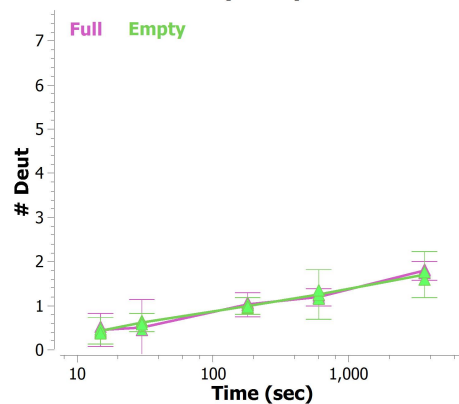

**AAV8\_VP1 526-536:  
MATHKDDEERF (#250)**

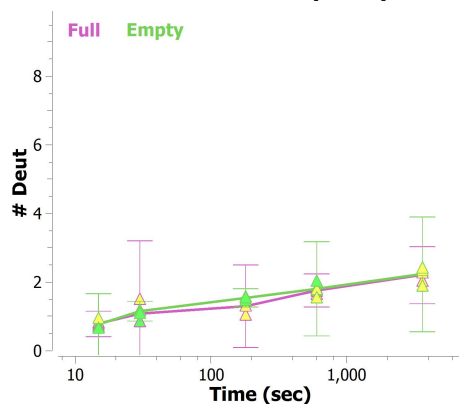

**AAV8\_VP1 526-540:  
MATHKDDEERFFPSN (#251)**

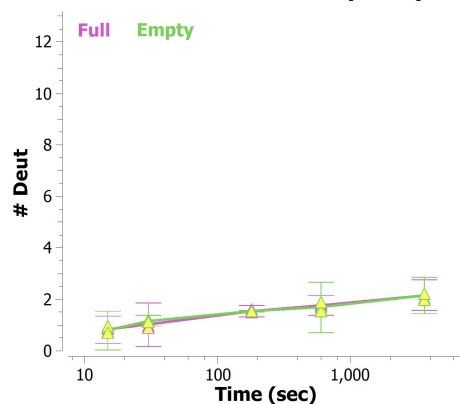

**AAV8\_VP1 526-541:  
MATHKDDEERFFPSNG (#252)**

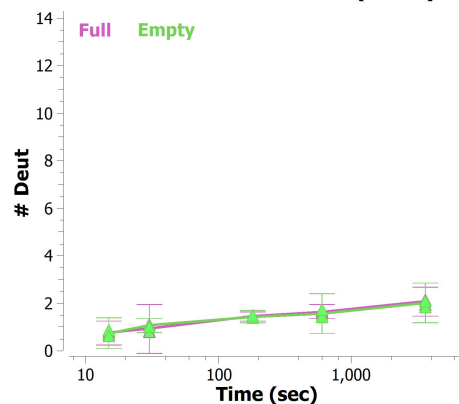

**AAV8\_VP1 526-543:  
MATHKDDEERFFPSNGIL (#253)**

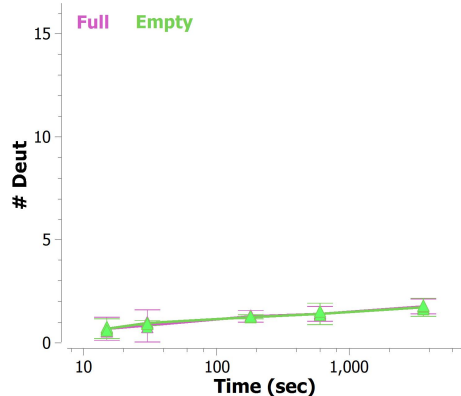

**AAV8\_VP1 526-545:  
MATHKDDEERFFPSNGILIF (#254)**

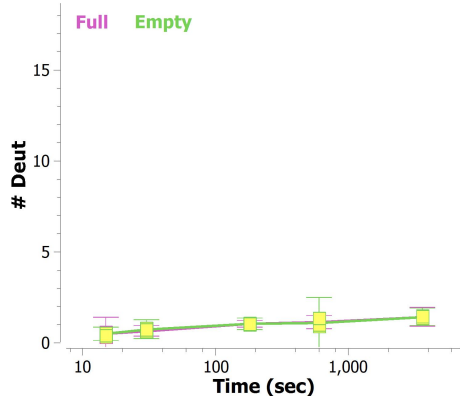

**AAV8\_VP1 527-540:  
ATHKDDEERFFPSN (#255)**

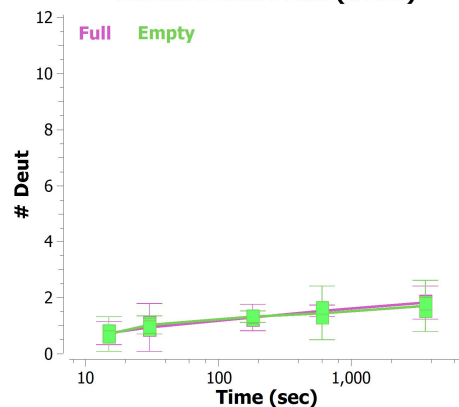

**AAV8\_VP1 527-541:  
ATHKDDEERFFPSNG (#256)**

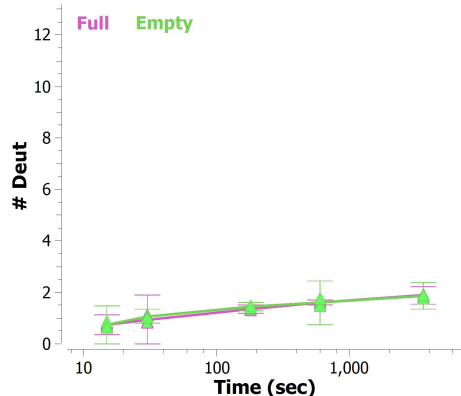

**AAV8\_VP1 527-543:  
ATHKDDEERFFPSNGIL (#257)**

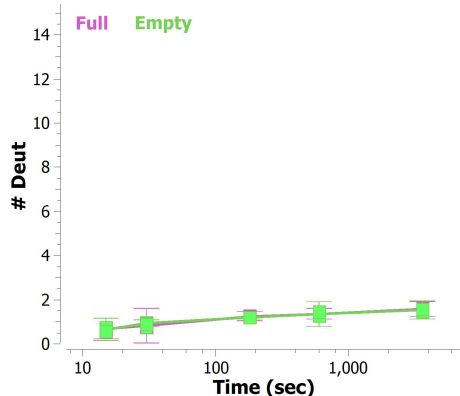

**AAV8\_VP1 529-543:  
HKDDEERFFPSNGIL (#258)**

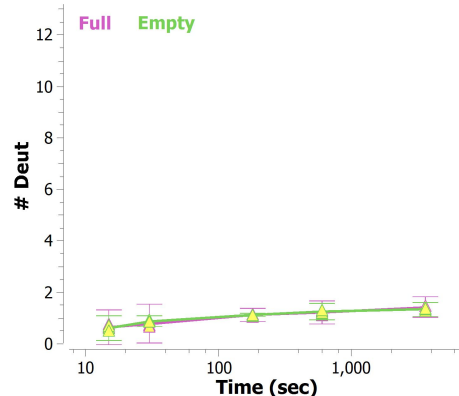

**AAV8\_VP1 534-540: ERFFPSN  
(#259)**

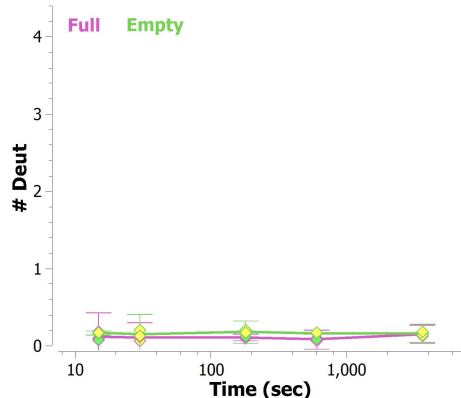

**AAV8\_VP1 534-541: ERFFPSNG  
(#260)**

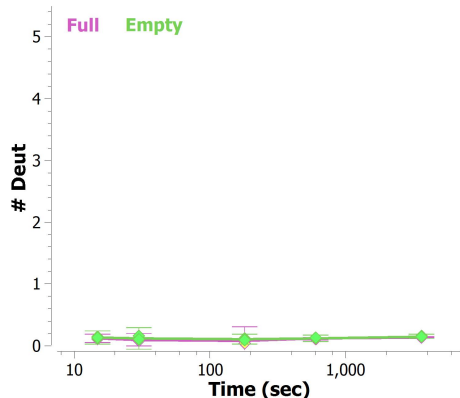

**AAV8\_VP1 534-543: ERFFPSNGIL  
(#261)**

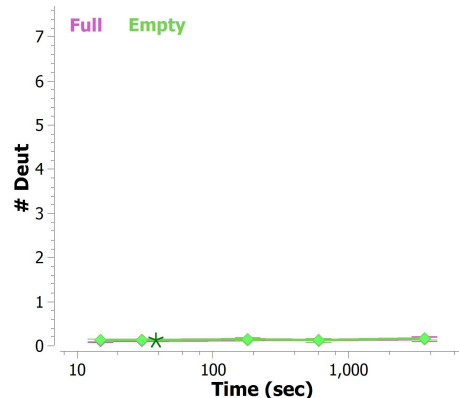

**AAV8\_VP1 534-544: ERFFPSNGILI  
(#262)**

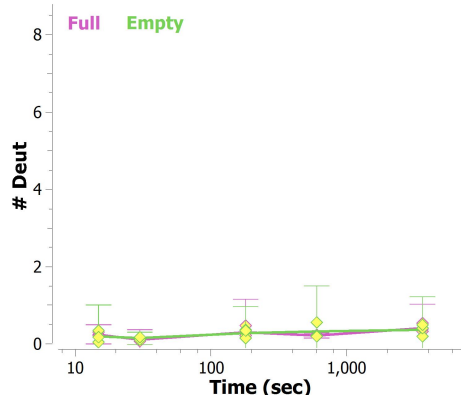

**AAV8\_VP1 534-556:  
ERFFPSNGILIFGKQNAARDNAD  
(#263)**

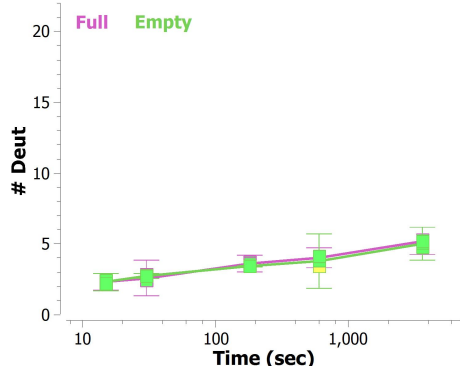

**AAV8\_VP1 535-541: RFFPSNG  
(#264)**

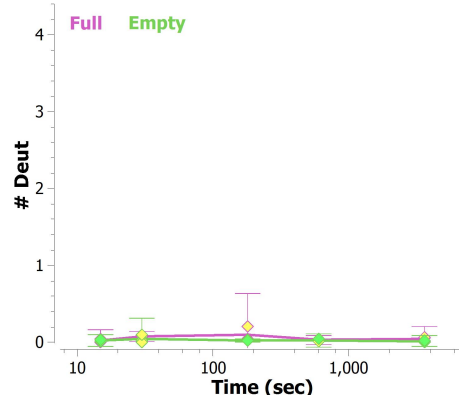

**AAV8\_VP1 535-543: RFFPSNGIL  
(#265)**

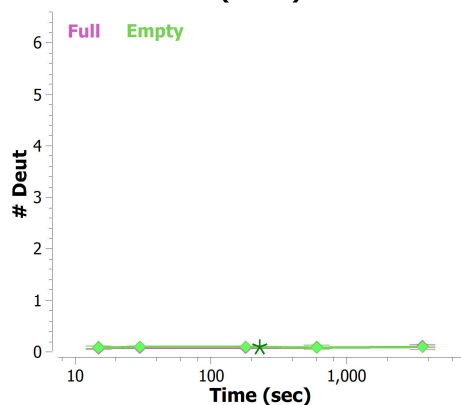

**AAV8\_VP1 535-556:  
RFFPSNGILIFGKQNAARDNAD  
(#266)**

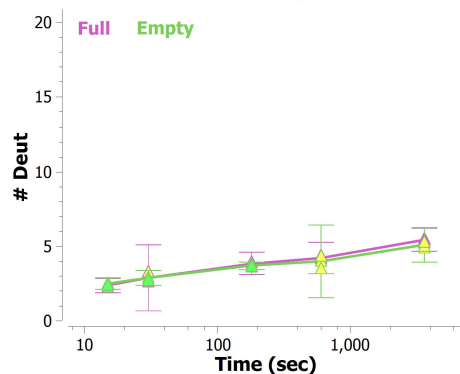

**AAV8\_VP1 537-543: FPSNGIL  
(#267)**

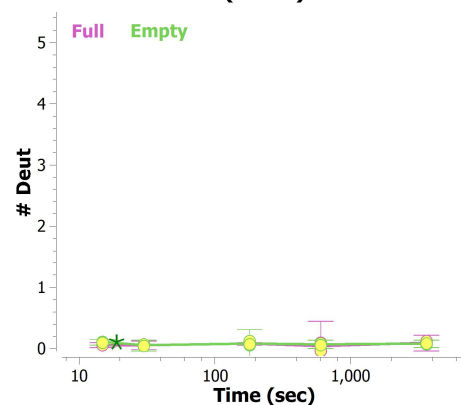

**AAV8\_VP1 541-556:  
GILIFGKQNAARDNAD (#268)**

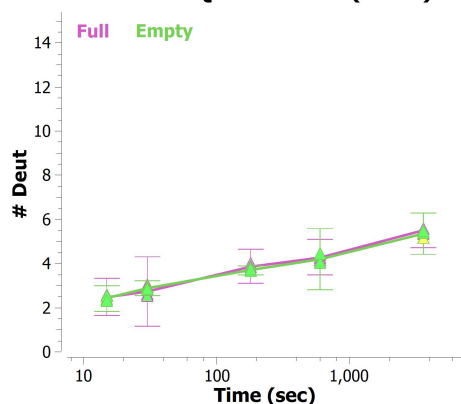

**AAV8\_VP1 542-556:  
ILIFGKQNAARDNAD (#269)**

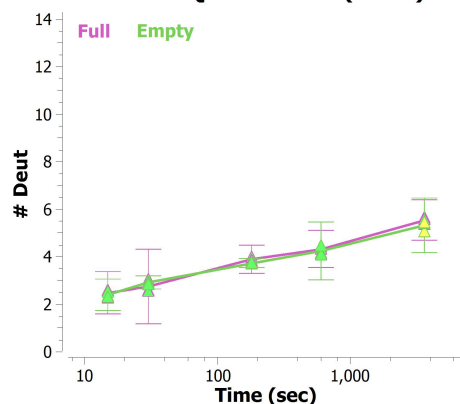

**AAV8\_VP1 542-559:  
ILIFGKQNAARDNADYSD (#270)**

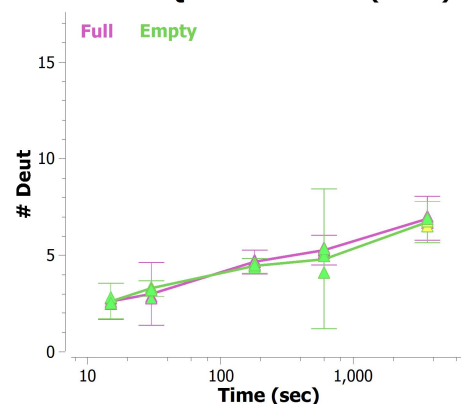

**AAV8\_VP1 544-550: IFGKQNA  
(#271)**

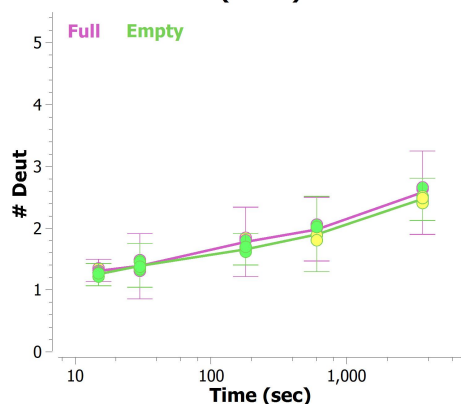

**AAV8\_VP1 544-553: IFGKQNAARD  
(#272)**

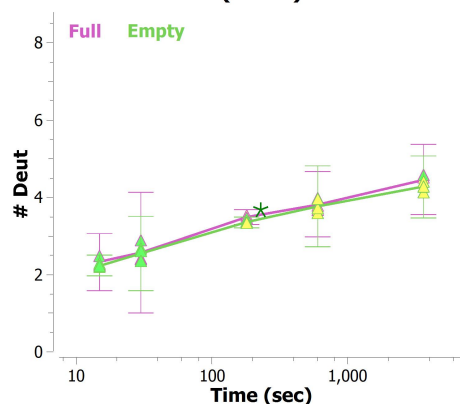

**AAV8\_VP1 544-556:  
IFGKQNAARDNAD (#273)**

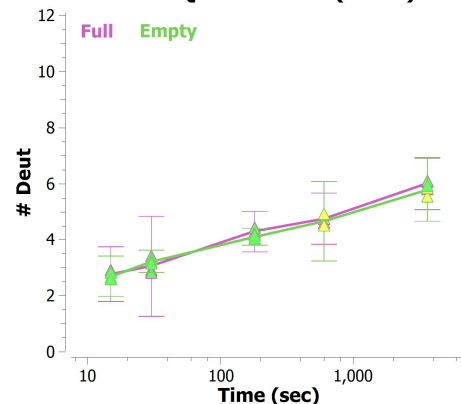

**AAV8\_VP1 544-557:  
IFGKQNAARDNADY (#274)**

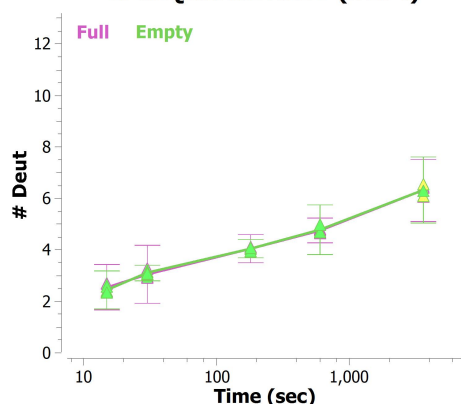

**AAV8\_VP1 544-558:  
IFGKQNAARDNADYS (#275)**

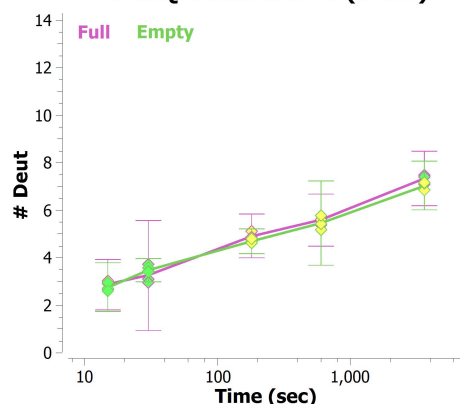

**AAV8\_VP1 544-559:  
IFGKQNAARDNADYSD (#276)**

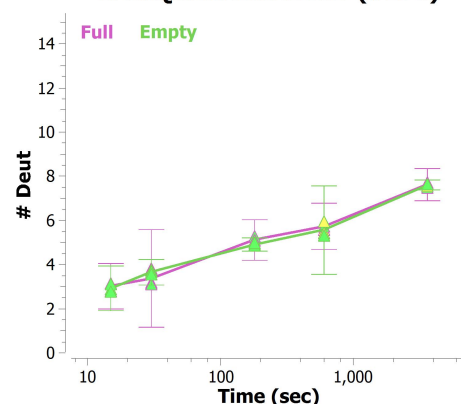

**AAV8\_VP1 544-561:  
IFGKQNAARDNADYSVDM (#277)**

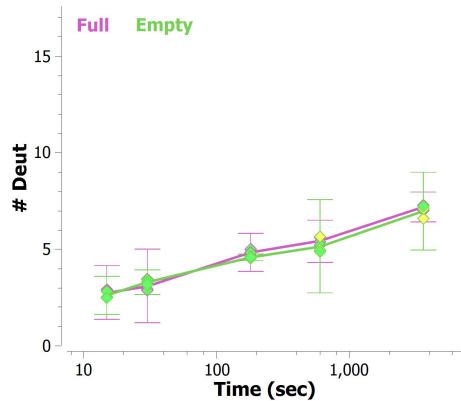

**AAV8\_VP1 544-562:  
IFGKQNAARDNADYSVDM (#278)**

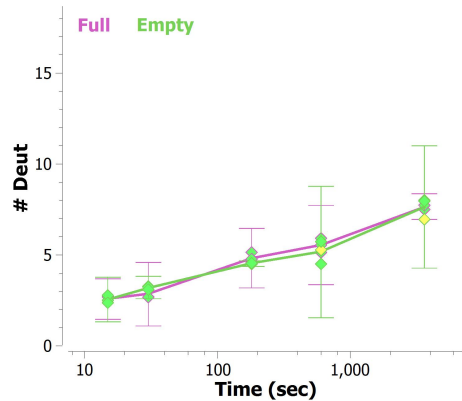

**AAV8\_VP1 546-556:  
GKQNAARDNAD (#279)**

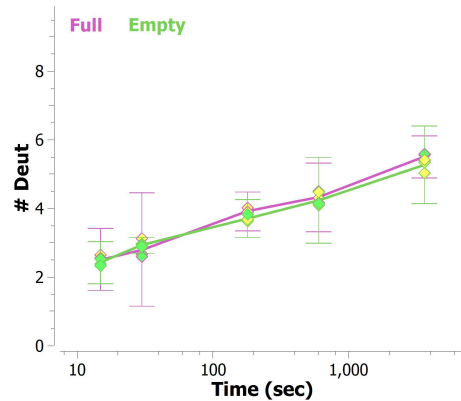

**AAV8\_VP1 546-559:  
GKQNAARDNADYS (#280)**

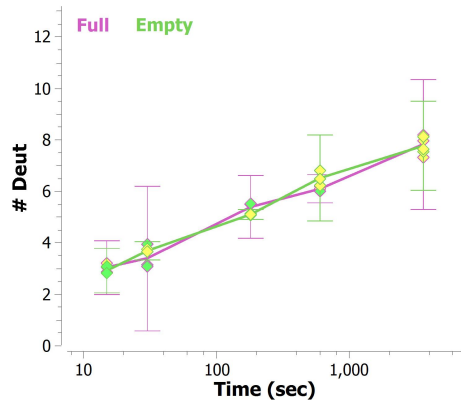

**AAV8\_VP1 554-559: NADYS (#281)**

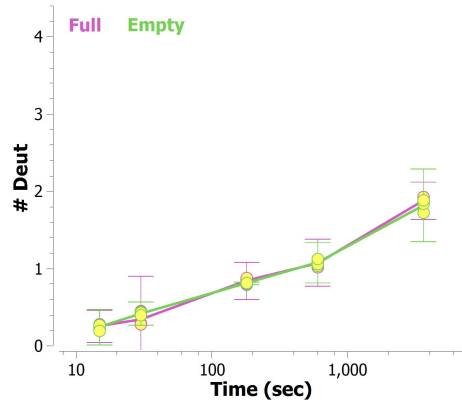

**AAV8\_VP1 557-560: YSDV (#282)**

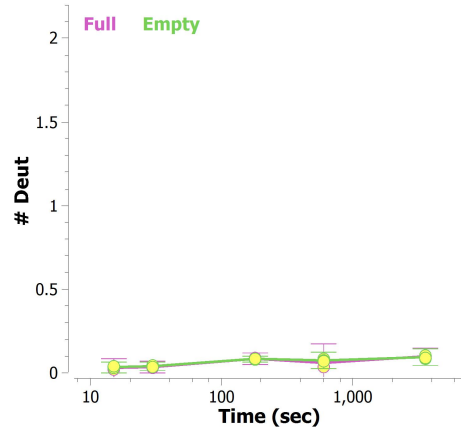

**AAV8\_VP1 557-561: YSDVM (#283)**

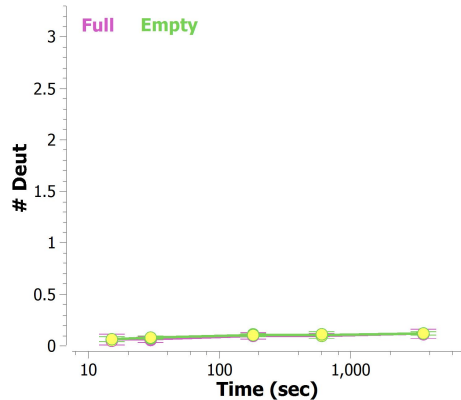

**AAV8\_VP1 557-565: YSDVMTSE (#284)**

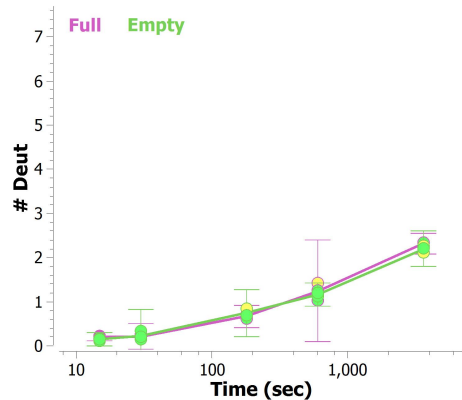

**AAV8\_VP1 558-562: SDVML (#285)**

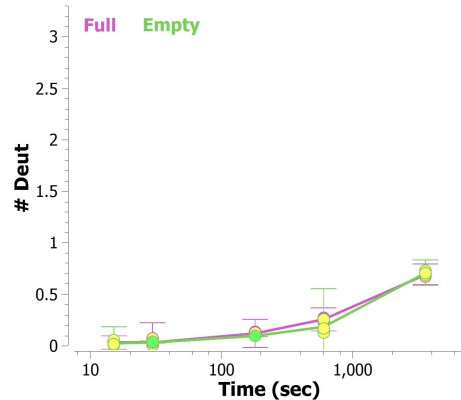

**AAV8\_VP1 559-565: DVMTSE (#286)**

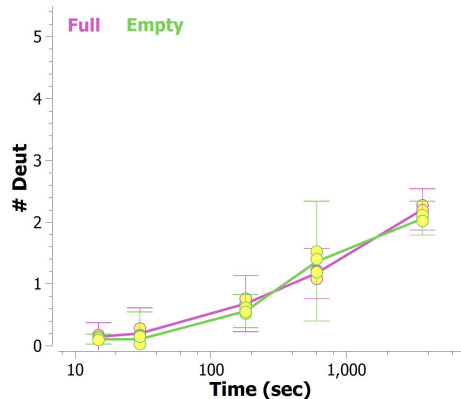

**AAV8\_VP1 560-565: VMLTSE (#287)**

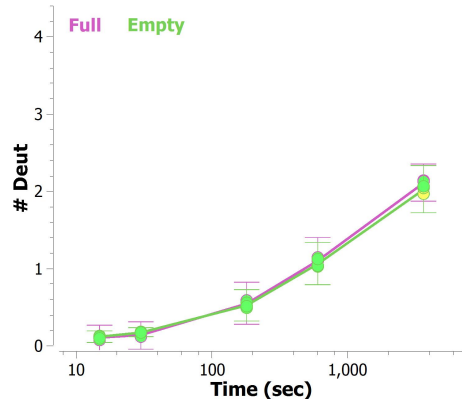

**AAV8\_VP1 560-566: VMLTSEE (#288)**

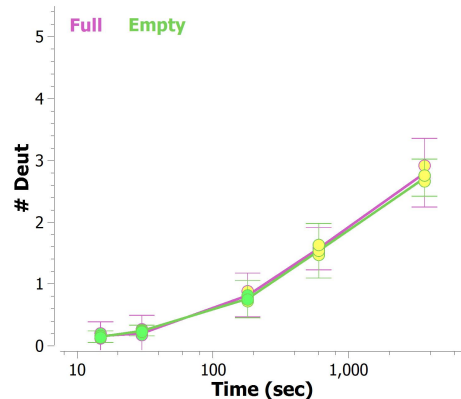

**AAV8\_VP1 560-567: VMLTSEEE**  
**(#289)**

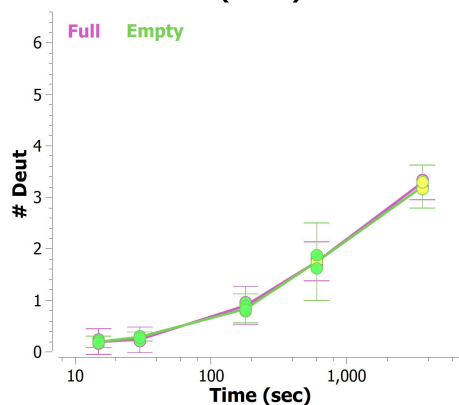

**AAV8\_VP1 560-576:  
VMLTSEEEIKTTNPVAT (#290)**

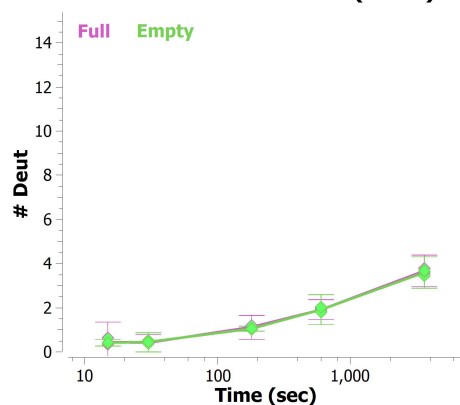

**AAV8\_VP1 560-578:  
VMLTSEEEIKTTNPVATEE (#291)**

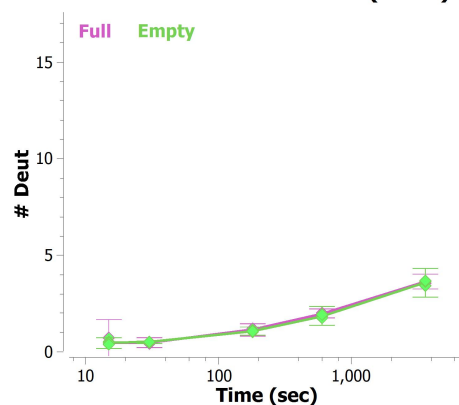

**AAV8\_VP1 561-565: MLTSE**  
**(#292)**

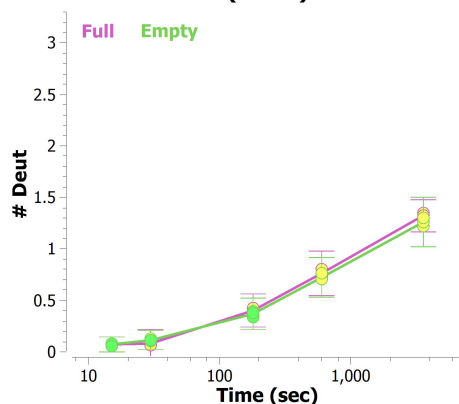

**AAV8\_VP1 561-567: MLTSEE**  
**(#293)**

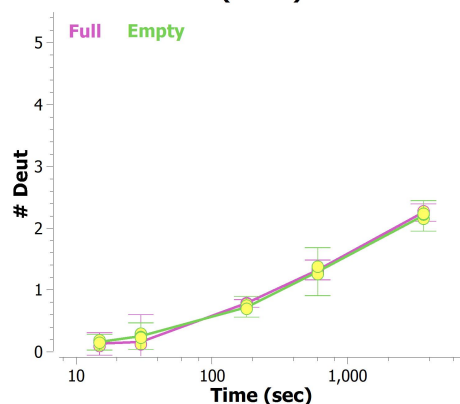

**AAV8\_VP1 561-578:  
MLTSEEEIKTTNPVATEE (#294)**

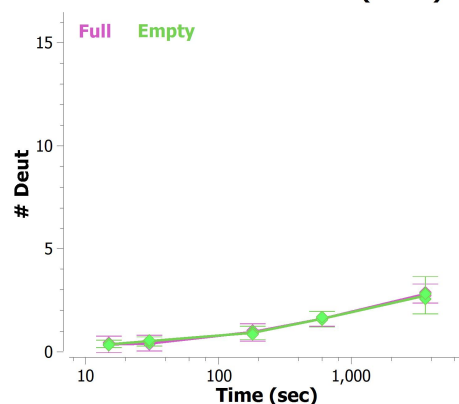

**AAV8\_VP1 562-566: LTSEE  
(#295)**

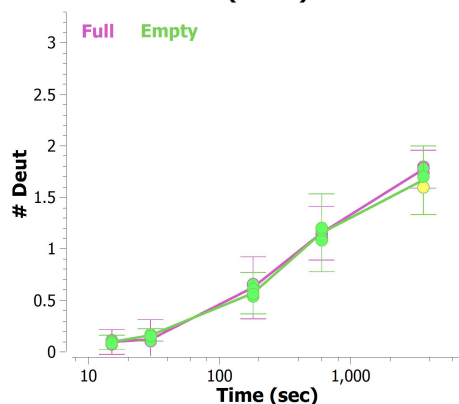

**AAV8\_VP1 562-567: LTSEEE  
(#296)**

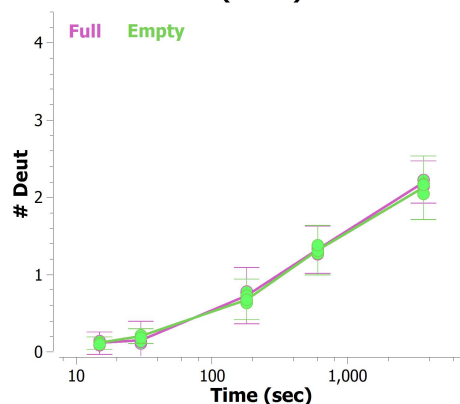

**AAV8\_VP1 562-575:  
LTSEEEIKTTNPVA (#297)**

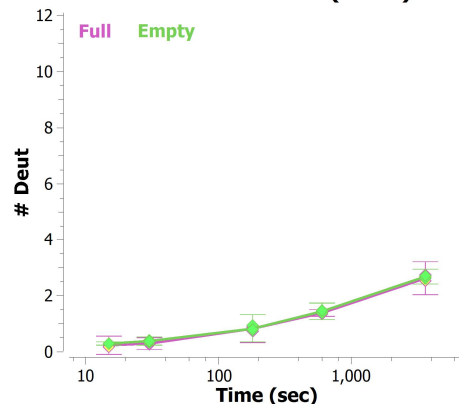

**AAV8\_VP1 562-576:  
LTSEEEIKTTNPVAT (#298)**

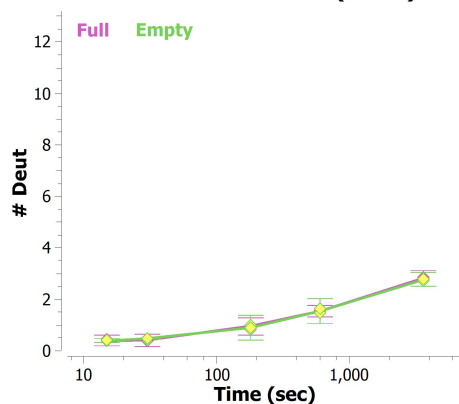

**AAV8\_VP1 562-578:  
LTSEEEIKTTNPVATEE (#299)**

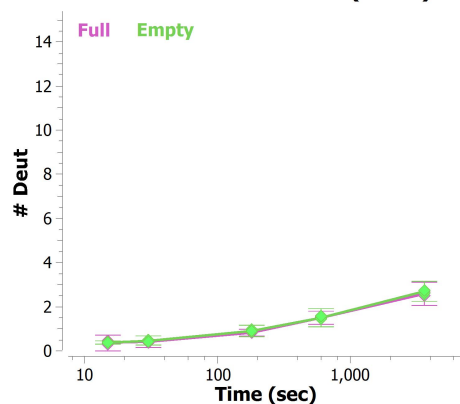

**AAV8\_VP1 563-575:  
TSEEEIKTTNPVA (#300)**

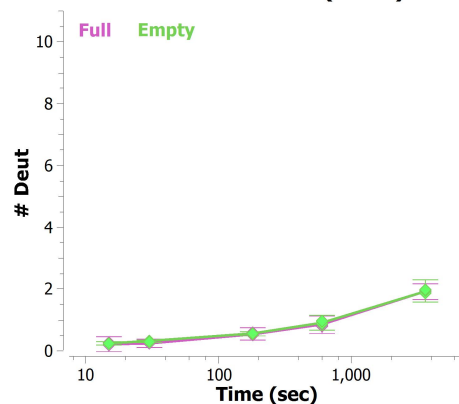

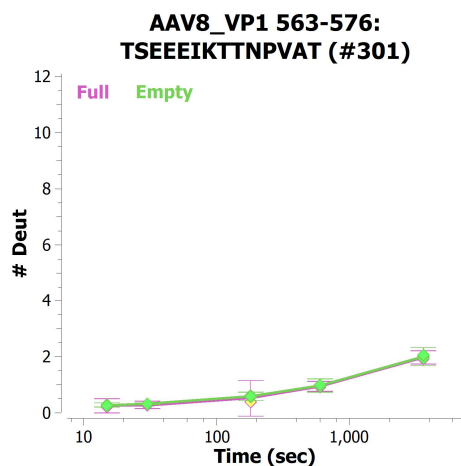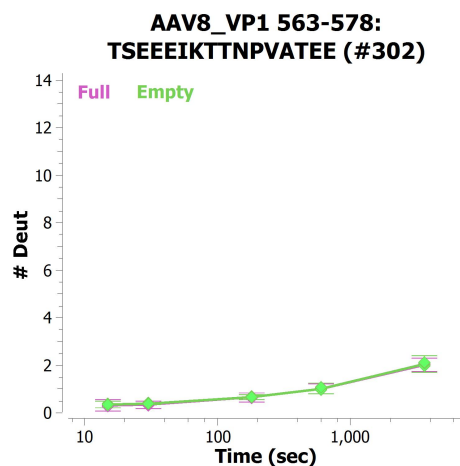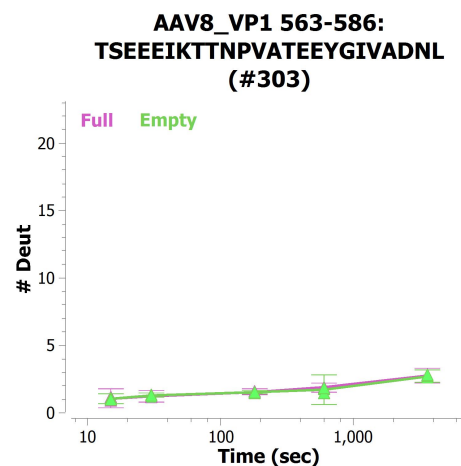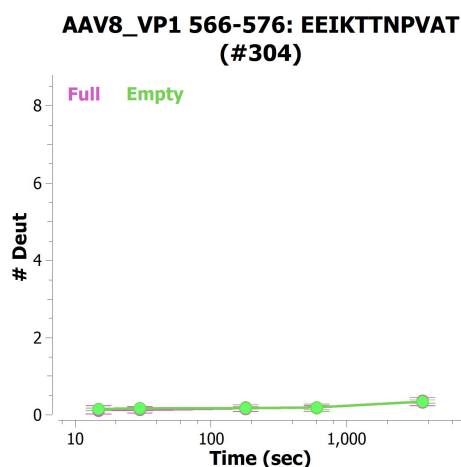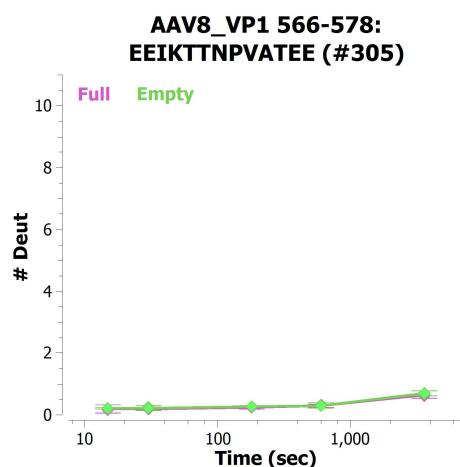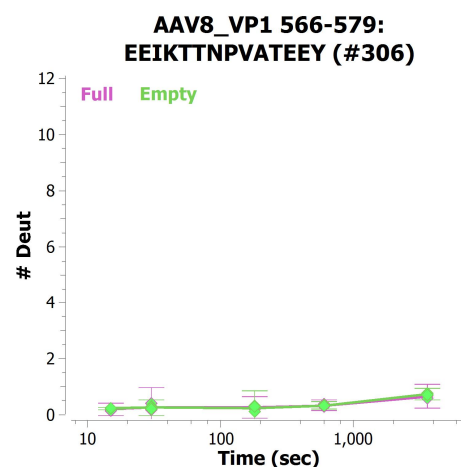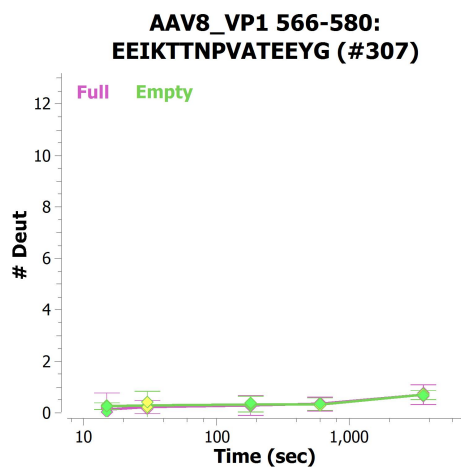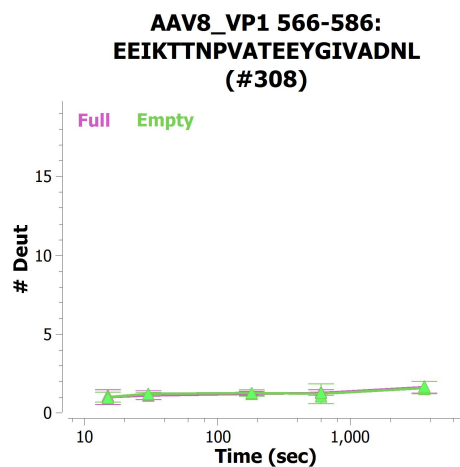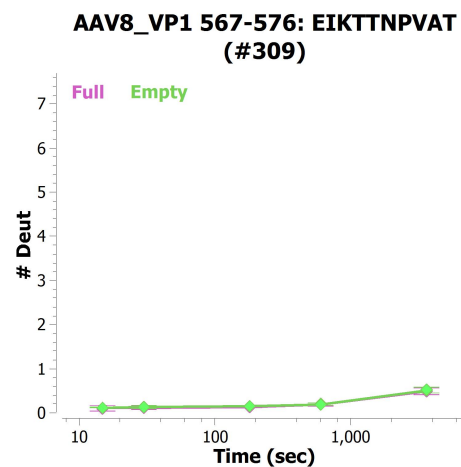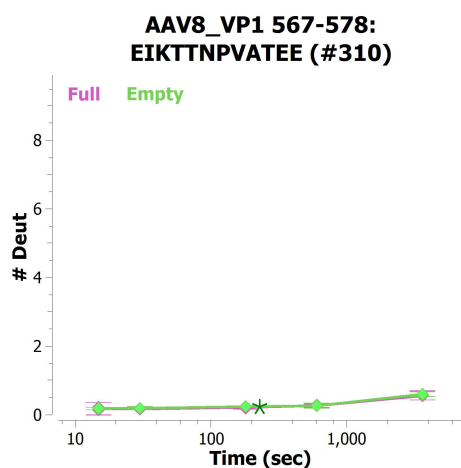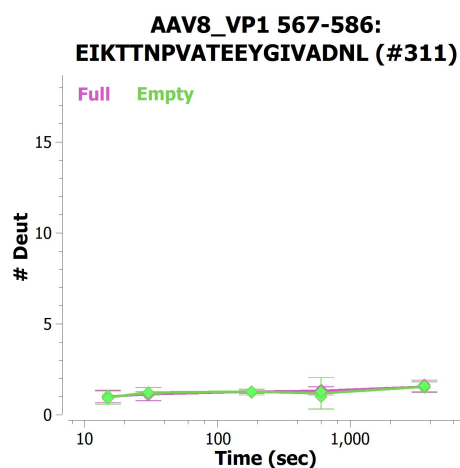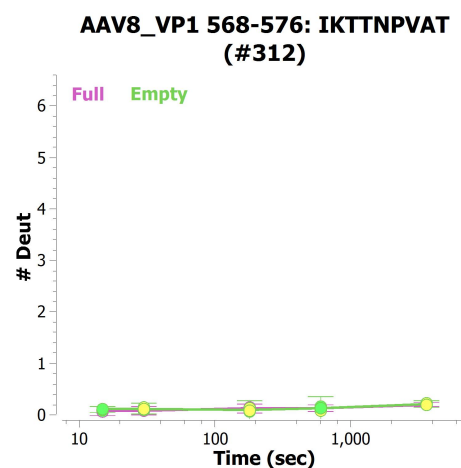



**AAV8\_VP1 568-578: IKTTNPVATEE  
(#313)**

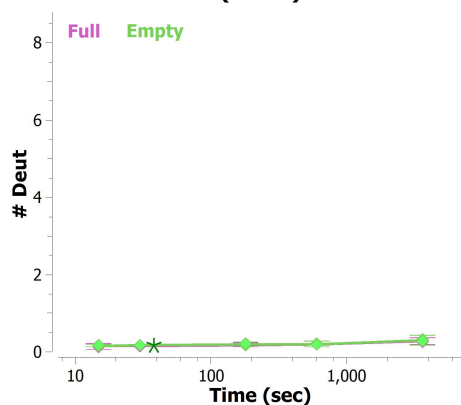

**AAV8\_VP1 568-586:  
IKTTNPVATEEYGIVADNL (#314)**

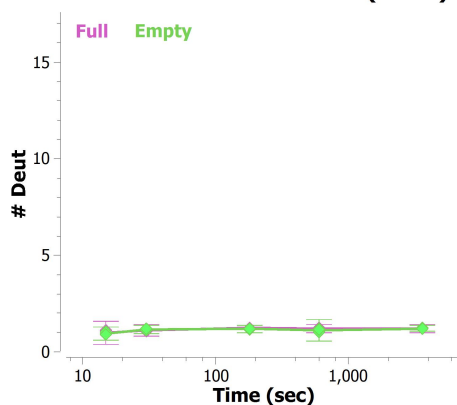

**AAV8\_VP1 577-584: EEYGIVAD  
(#315)**

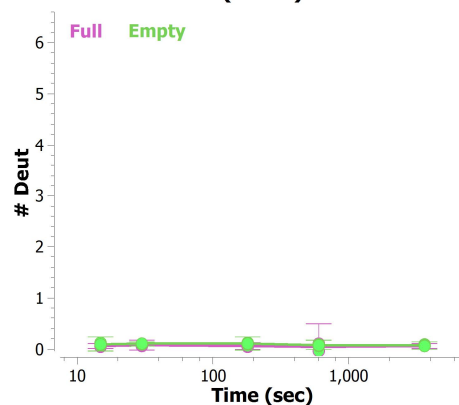

**AAV8\_VP1 577-586: EEYGIVADNL  
(#316)**

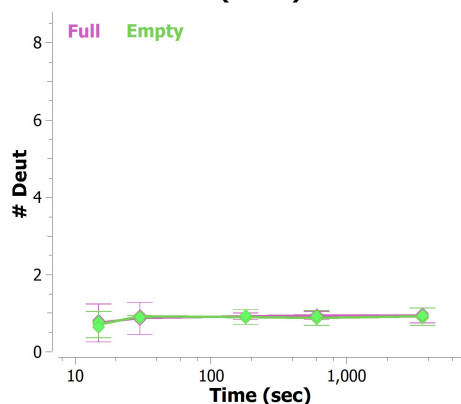

**AAV8\_VP1 579-584: YGIVAD  
(#317)**

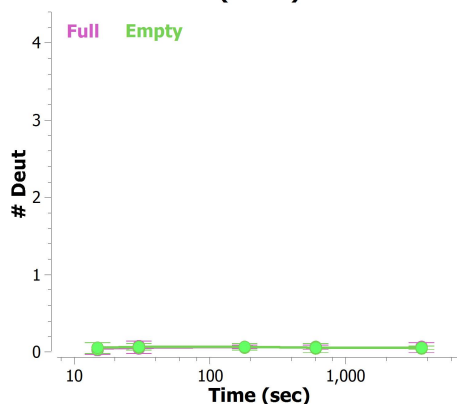

**AAV8\_VP1 579-586: YGIVADNL  
(#318)**

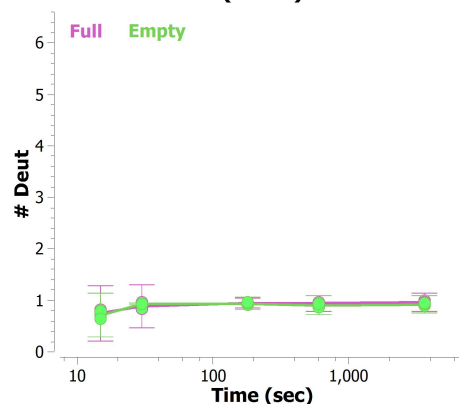

**AAV8\_VP1 579-587: YGIVADNLQ  
(#319)**

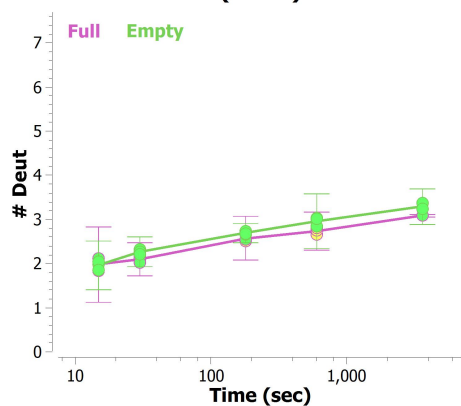

**AAV8\_VP1 580-586: GIVADNL  
(#320)**

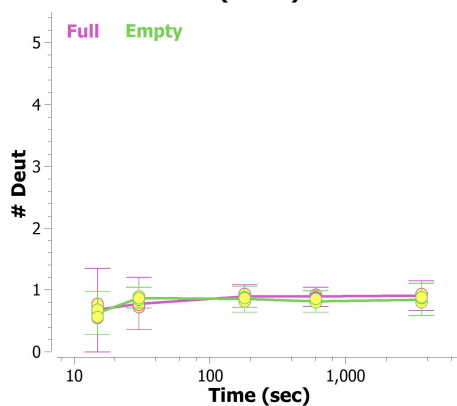

**AAV8\_VP1 608-613: VWQNRD  
(#321)**

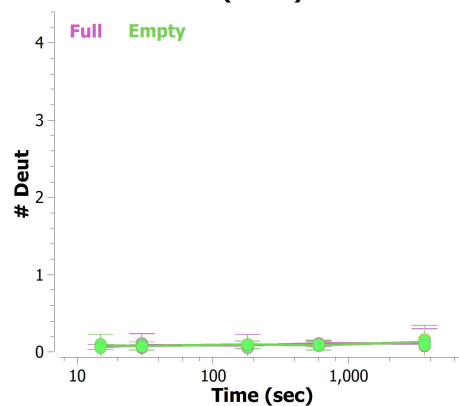

**AAV8\_VP1 608-616: VWQNRDVYL  
(#322)**

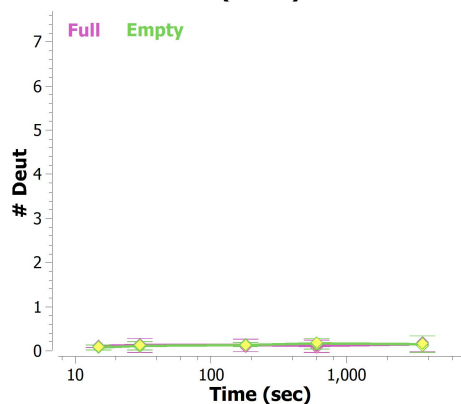

**AAV8\_VP1 610-621:  
QNRDVYLQGPIW (#323)**

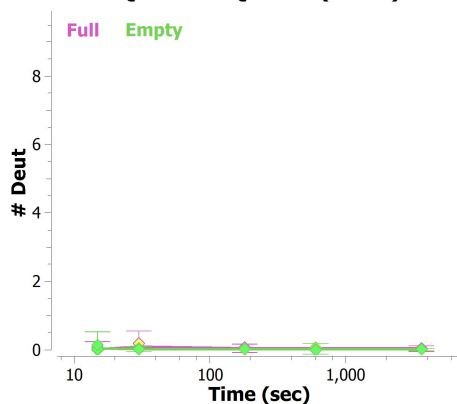

**AAV8\_VP1 611-621:  
NRDVYLQGPIW (#324)**

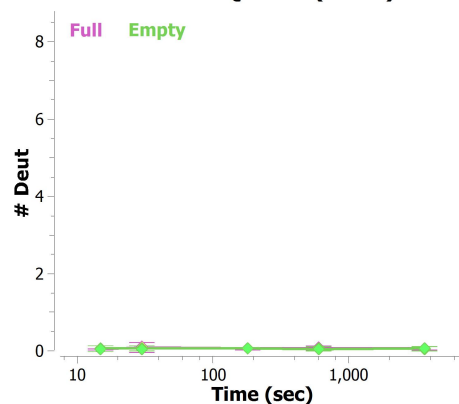

**AAV8\_VP1 614-621: VYLQGPIW (#325)**

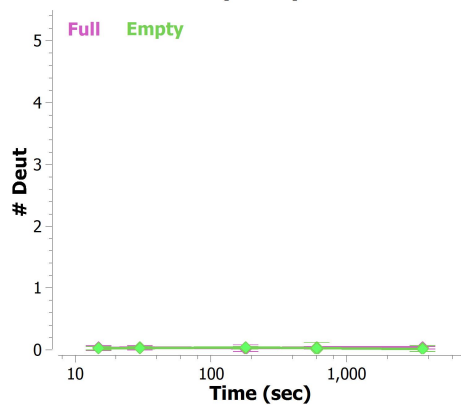

**AAV8\_VP1 616-621: LQGPIW (#326)**

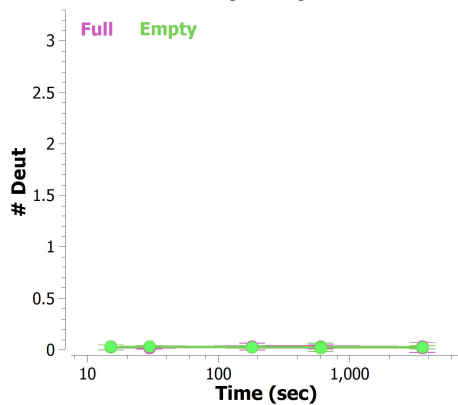

**AAV8\_VP1 622-631: AKIPHTDGNF (#327)**

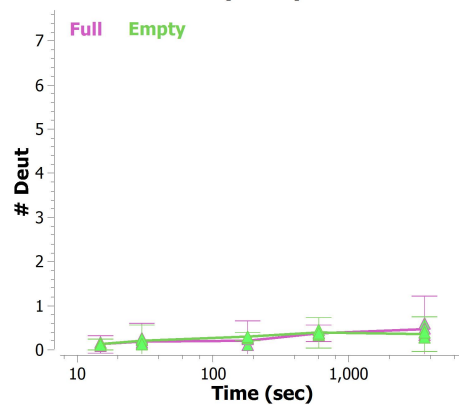

**AAV8\_VP1 622-637: AKIPHTDGNFHPSPLM (#328)**

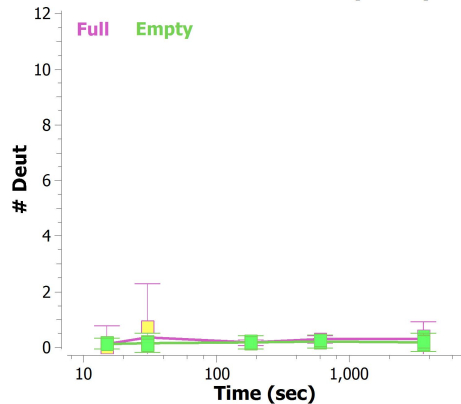

**AAV8\_VP1 622-640: AKIPHTDGNFHPSPLMGGF (#329)**

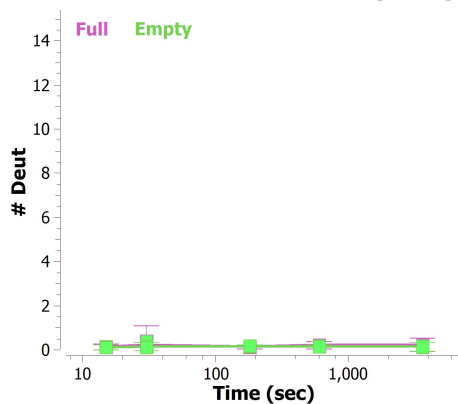

**AAV8\_VP1 622-650: KIPHTDGNFHPSPLMGGFGLKHPPPQI (#330)**

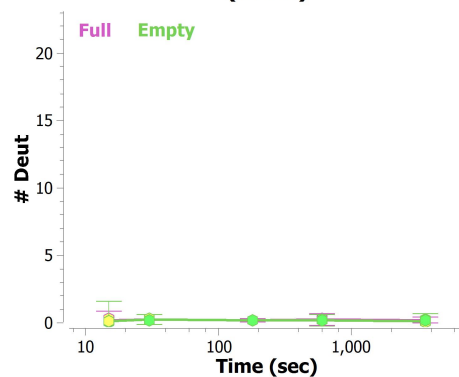

**AAV8\_VP1 638-650: GGFGGLKHPPPQIL (#331)**

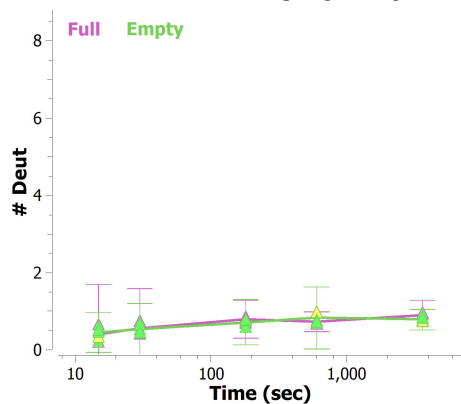

**AAV8\_VP1 640-650: FGLKHPPPQIL (#332)**

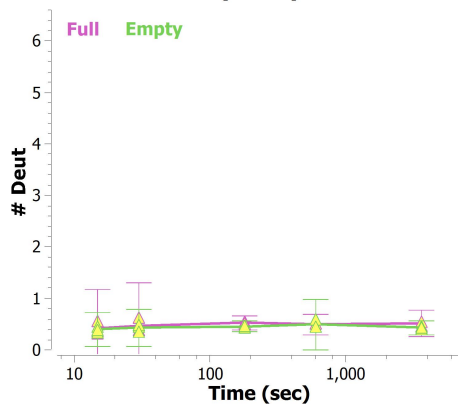

**AAV8\_VP1 641-650: GLKHPPPQIL (#333)**

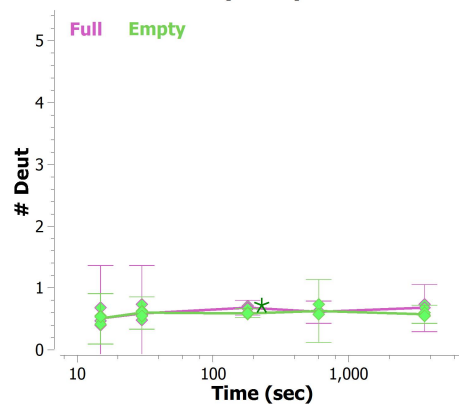

**AAV8\_VP1 650-671: LIKNTVPADPPTTFNQSKLNS (#334)**

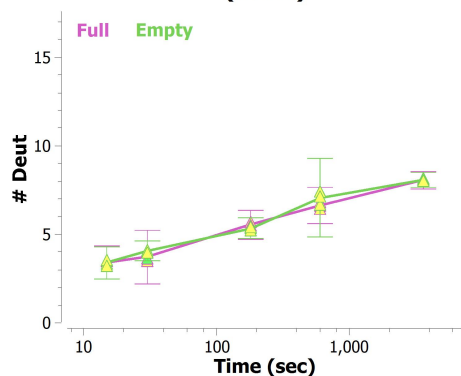

**AAV8\_VP1 651-664: IKNTVPADPPTTF (#335)**

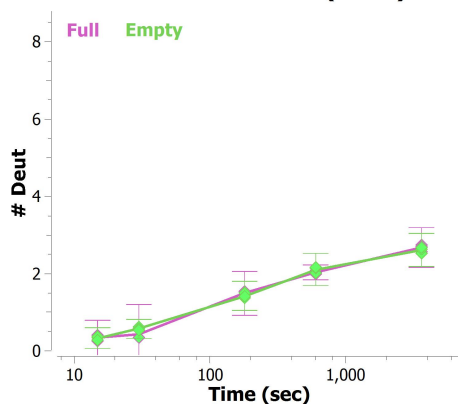

**AAV8\_VP1 651-665: IKNTVPADPPTTFN (#336)**

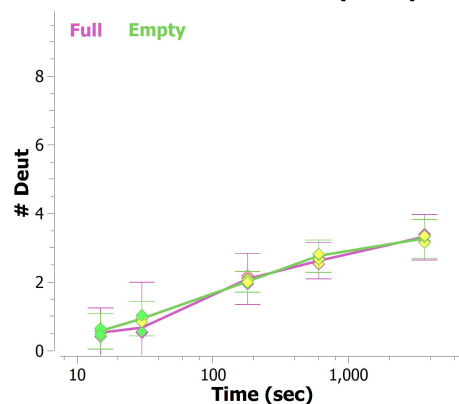

**AAV8\_VP1 651-666:  
IKNTPVPADPPTTFNQ (#337)**

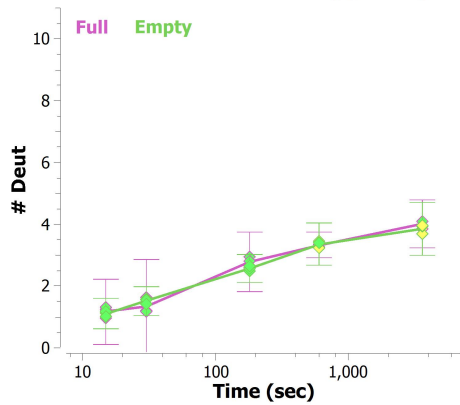

**AAV8\_VP1 651-669:  
IKNTPVPADPPTTFNQSKL (#338)**

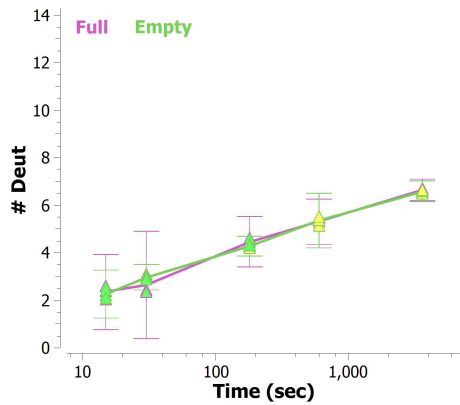

**AAV8\_VP1 651-671:**  
**IKNTPVPADPPTTFNQSKLNS**  
**(#339)**

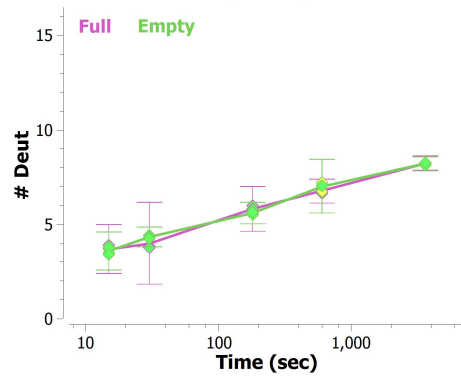

**AAV8\_VP1 651-672:  
IKNTPVPADPPTTFNQSKLNSF  
(#340)**

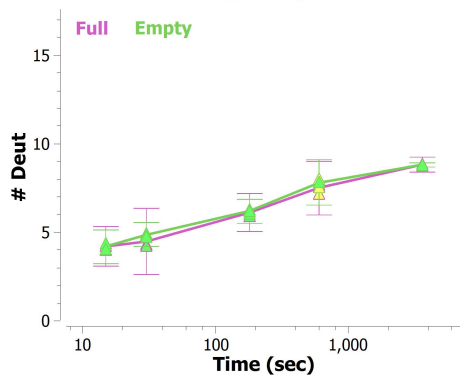

**AAV8\_VP1 665-684:  
NQSKLNSFITQYSTGQVSVE (#341)**

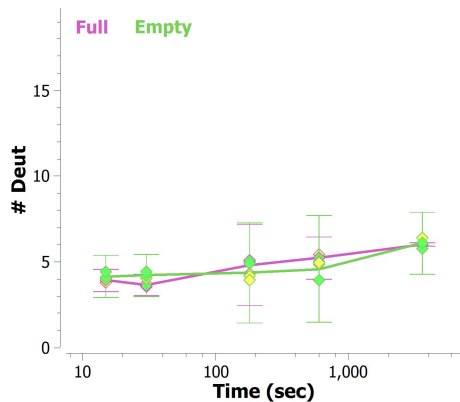

**AAV8\_VP1 670-675: NSFITQ  
(#342)**

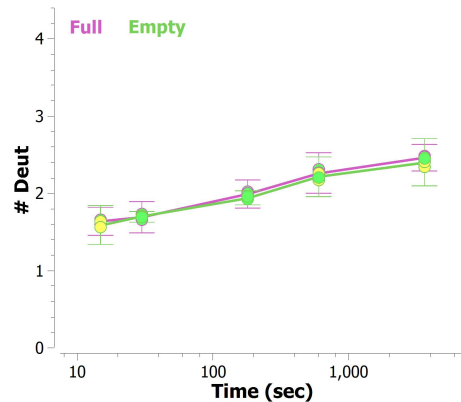

**AAV8\_VP1 670-683:  
NSFITQYSTGQVSV (#343)**

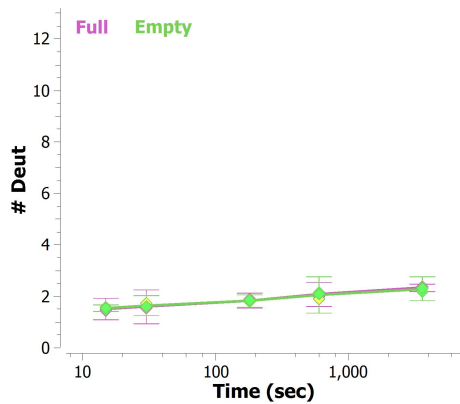

**AAV8\_VP1 672-675: FITQ (#344)**

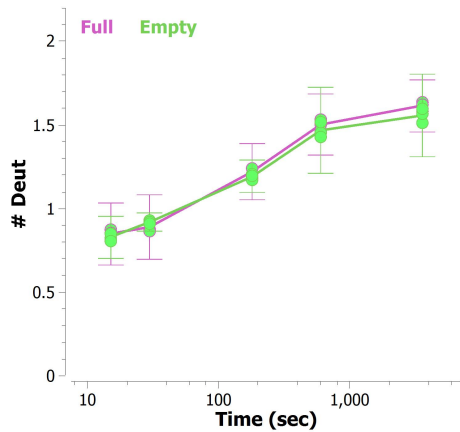

**AAV8\_VP1 672-682: FITQYSTGQVS**  
**(#345)**

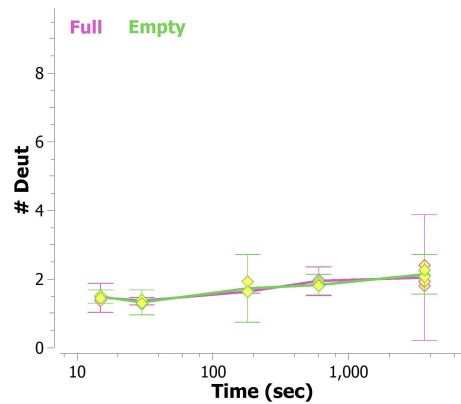

**AAV8\_VP1 672-683:  
FITQYSTGQVSV (#346)**

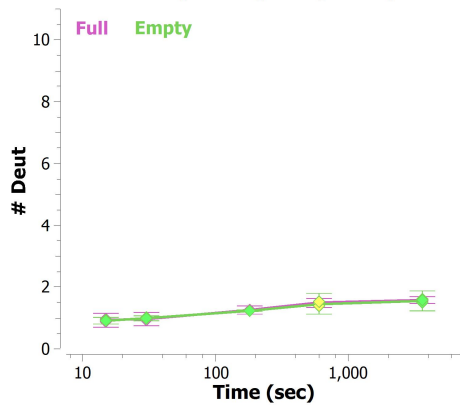

**AAV8\_VP1 672-684:  
FITQYSTGQVSVE (#347)**

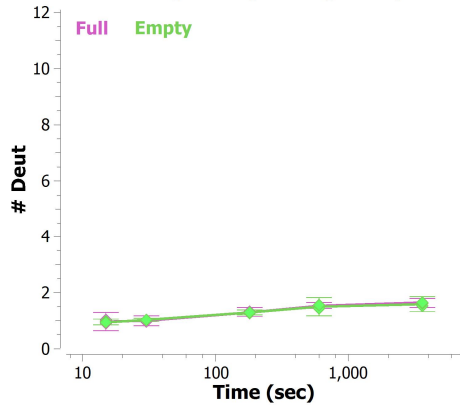

**AAV8\_VP1 673-676: ITQY (#348)**

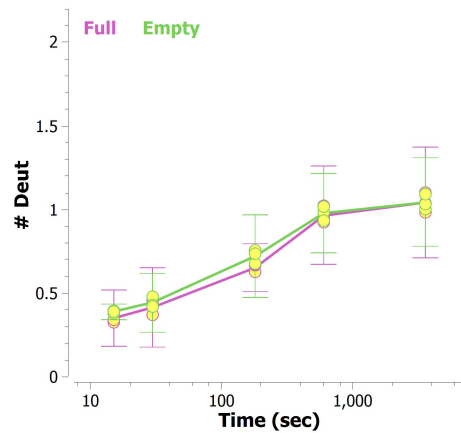

**AAV8\_VP1 673-683:  
ITQYSTGQVSV (#349)**

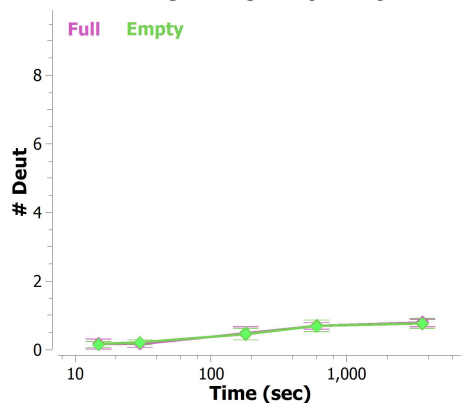

**AAV8\_VP1 673-684:  
ITQYSTGQVSVE (#350)**

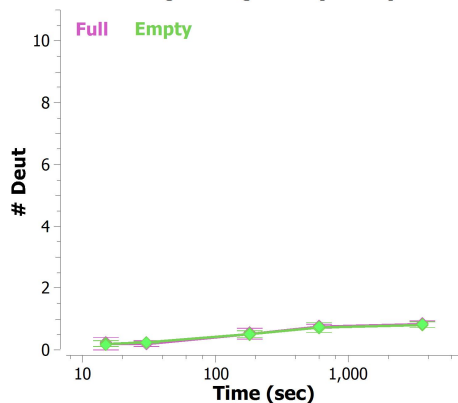

**AAV8\_VP1 676-683: YSTGQVSV  
(#351)**

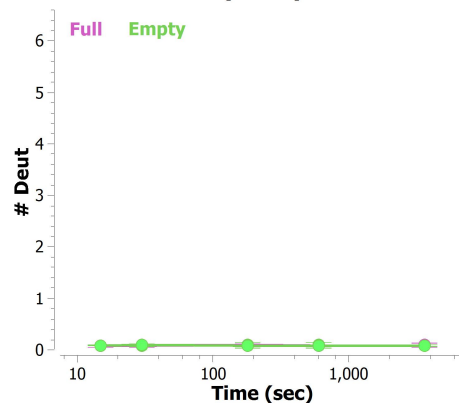

**AAV8\_VP1 676-684: YSTGQVSVE  
(#352)**

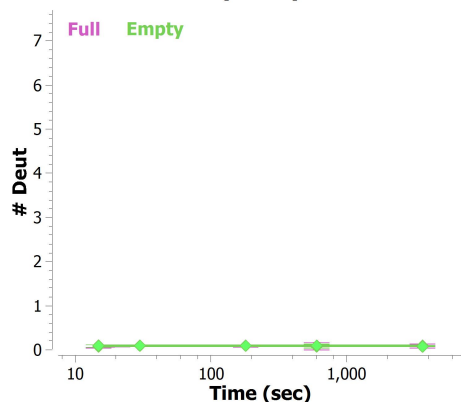

**AAV8\_VP1 677-684: STGQVSVE  
(#353)**

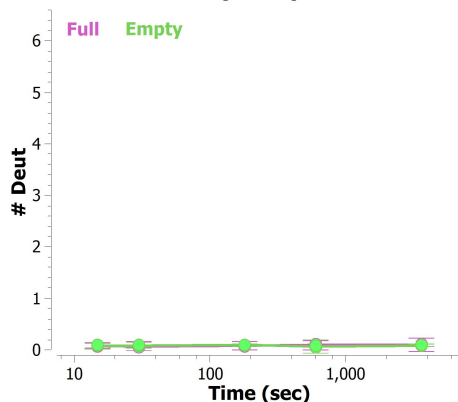

**AAV8\_VP1 683-689: VEIEWEL  
(#354)**

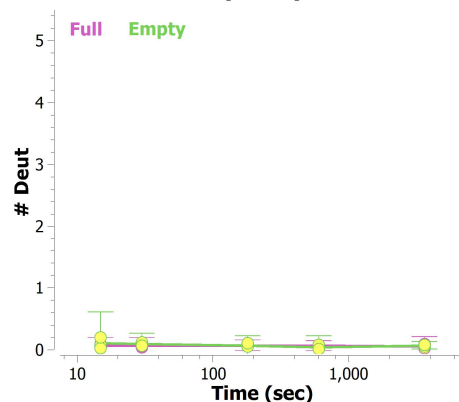

**AAV8\_VP1 683-703:  
VEIEWELQKENSkrwnPEIQY  
(#355)**

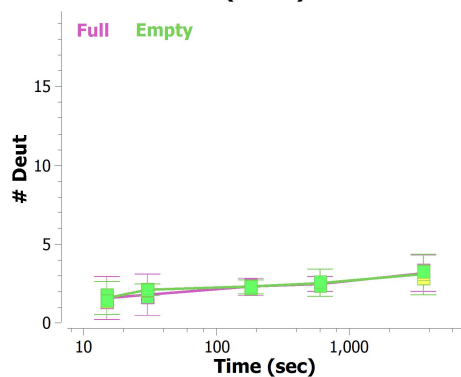

**AAV8\_VP1 684-689: EIEWEL  
(#356)**

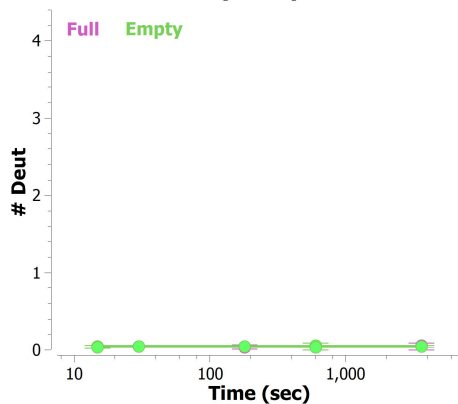

**AAV8\_VP1 684-702:  
EIEWELQKENSkrwnPEIQ (#357)**

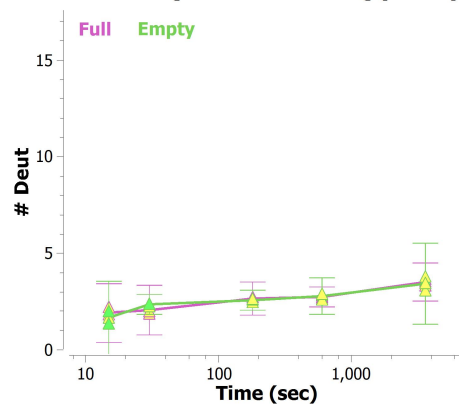

**AAV8\_VP1 684-703:  
EIEWELQKENSkrwnPEIQY  
(#358)**

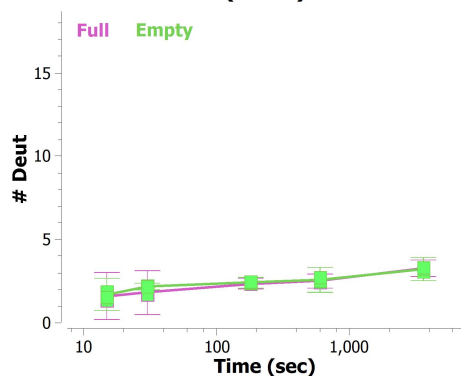

**AAV8\_VP1 684-705:  
EIEWELQKENSkrwnPEIQYS  
(#359)**

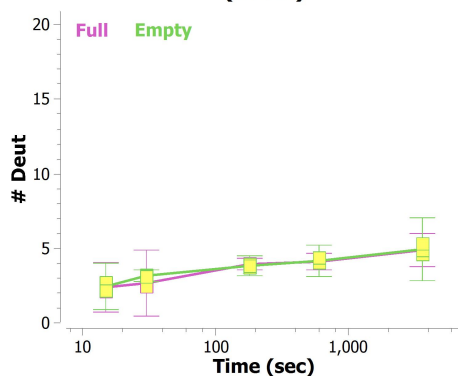

**AAV8\_VP1 684-706:  
EIEWELQKENSkrwnPEIQYTSN  
(#360)**

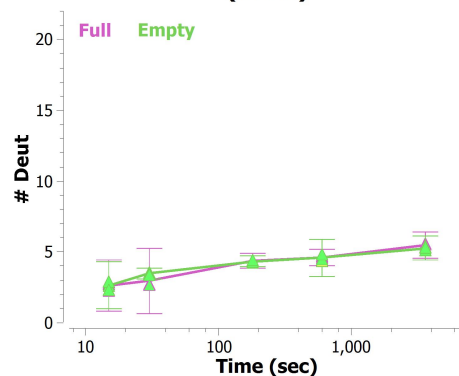

**AAV8\_VP1 684-707:  
EIEWELQKENS KRWNPEIQYTSNY  
(#361)**

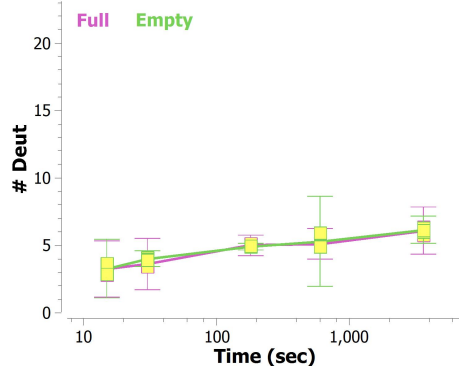

**AAV8\_VP1 685-689: IEWEL  
(#362)**

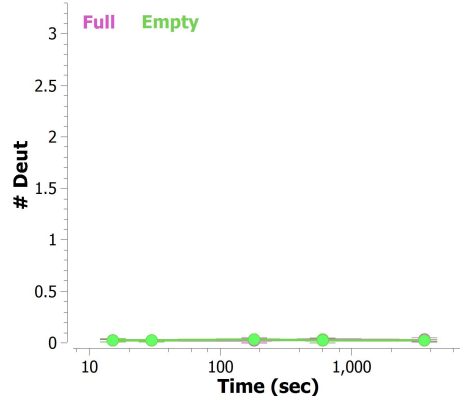

**AAV8\_VP1 685-702: IEWELQKENS KRWNPEIQ (#363)**

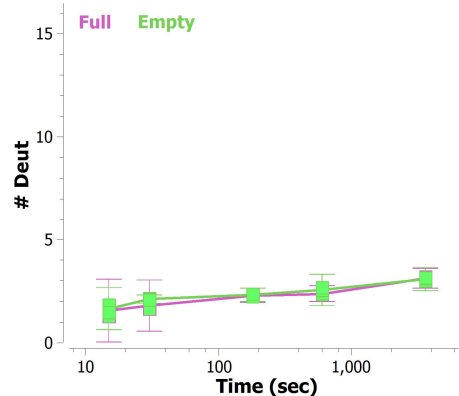

**AAV8\_VP1 685-703: IEWELQKENS KRWNPEIQY (#364)**

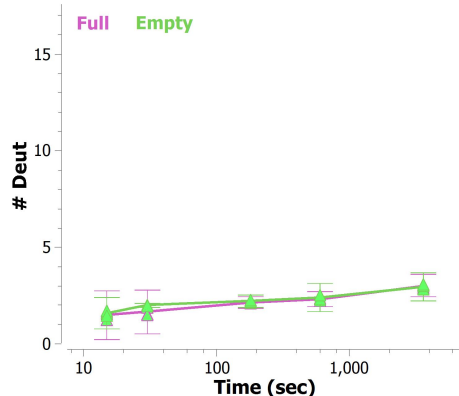

**AAV8\_VP1 685-706: IEWELQKENS KRWNPEIQYTSN  
(#365)**

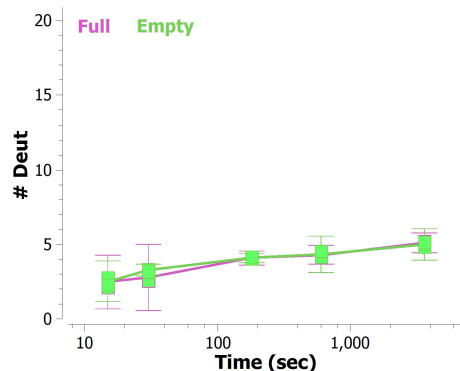

**AAV8\_VP1 685-707: IEWELQKENS KRWNPEIQYTSNY  
(#366)**

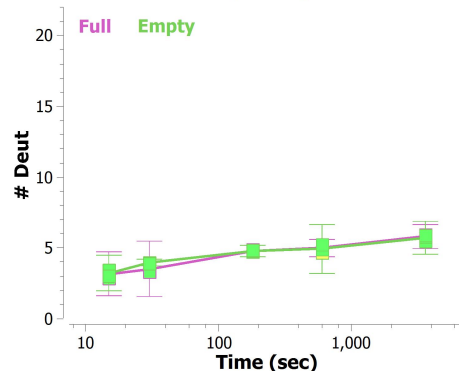

**AAV8\_VP1 687-703: WELQKENS KRWNPEIQY (#367)**

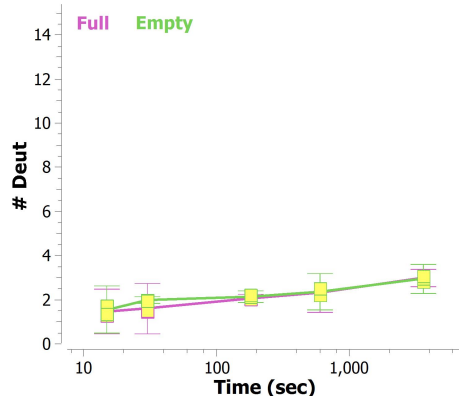

**AAV8\_VP1 687-706: WELQKENS KRWNPEIQYTSN  
(#368)**

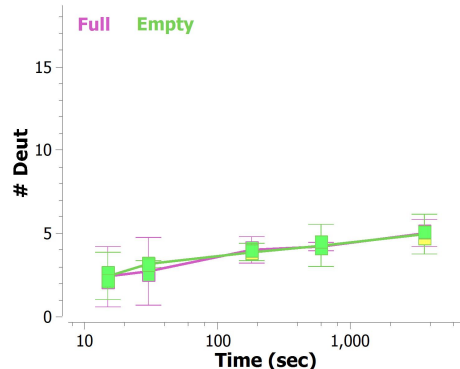

**AAV8\_VP1 688-703: ELQKENS KRWNPEIQY (#369)**

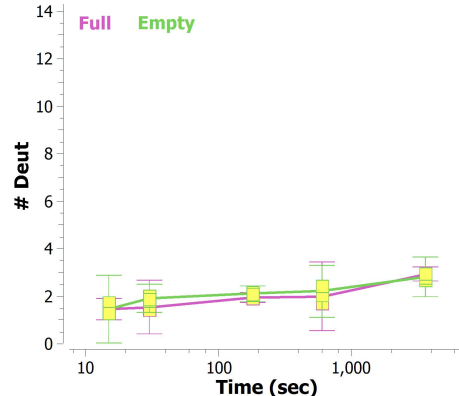

**AAV8\_VP1 688-706: ELQKENS KRWNPEIQYTSN (#370)**

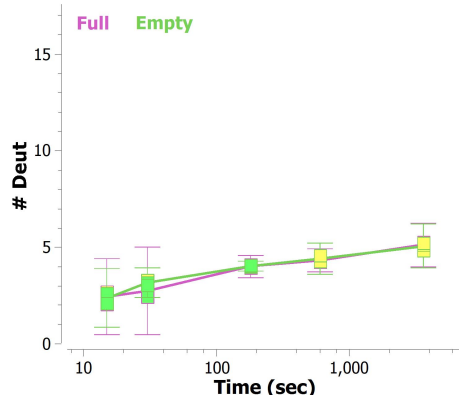

**AAV8\_VP1 689-706: LQKENS KRWNPEIQYTSN (#371)**

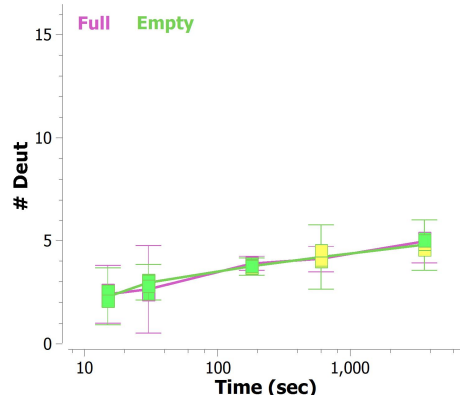

**AAV8\_VP1 690-702: QKENS KRWNPEIQ (#372)**

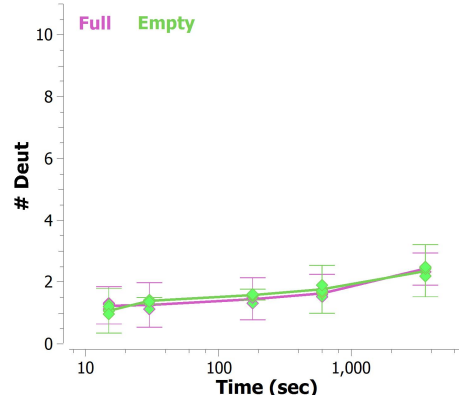

**AAV8\_VP1 690-703:  
QKENSKRWNPEIQY (#373)**

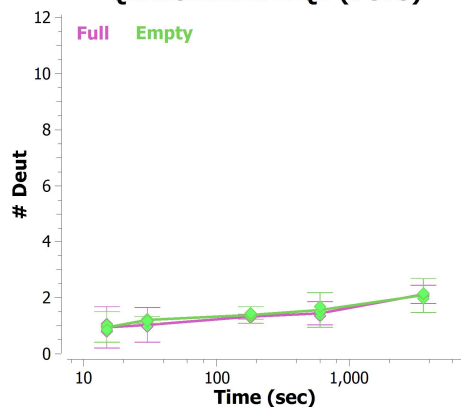

**AAV8\_VP1 690-706:  
QKENSKRWNPEIQYTSN (#374)**

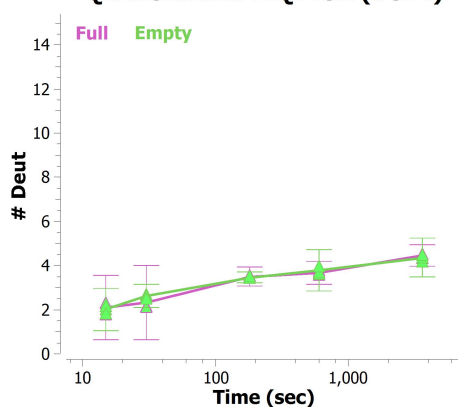

**AAV8\_VP1 690-707:  
QKENSKRWNPEIQYTSNY (#375)**

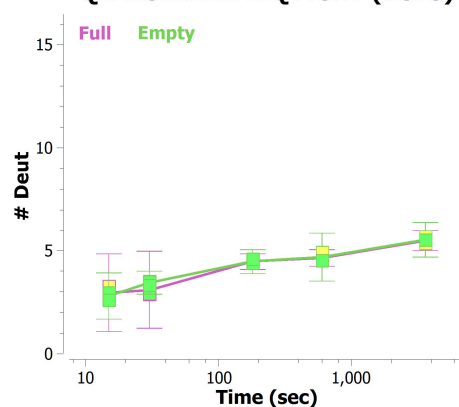

**AAV8\_VP1 691-703:  
KENSKRWNPEIQY (#376)**

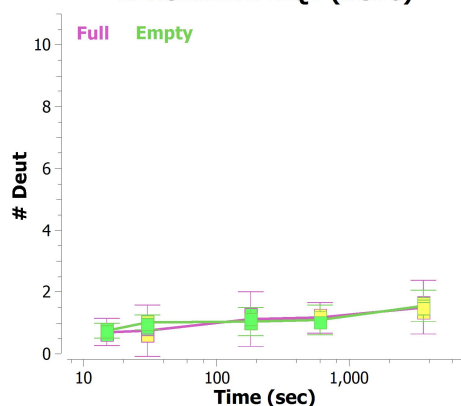

**AAV8\_VP1 695-703: KRWNPFIQY  
(#377)**

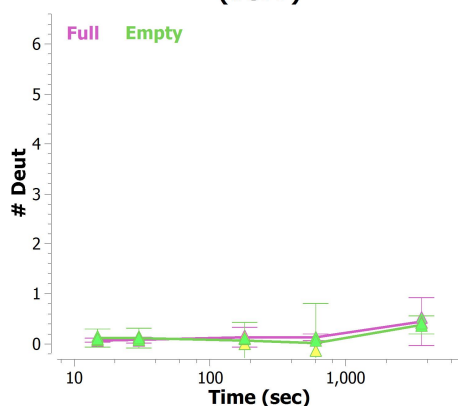

**AAV8\_VP1 695-706:  
KRWNPFIQYTSN (#378)**

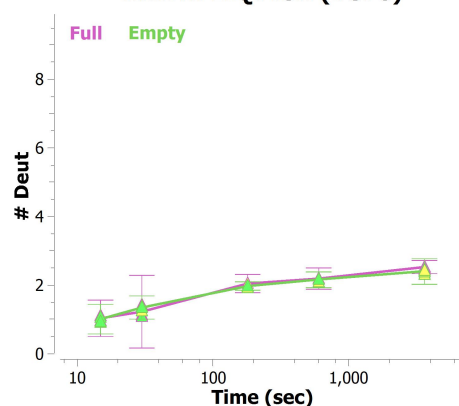

**AAV8\_VP1 703-715:  
YTSNYYKSTSVDF (#379)**

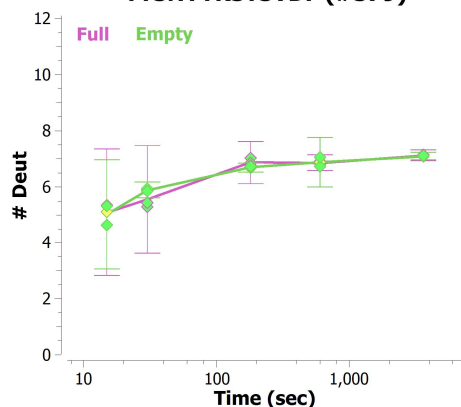

**AAV8\_VP1 704-715:  
TSNYYKSTSVDF (#380)**

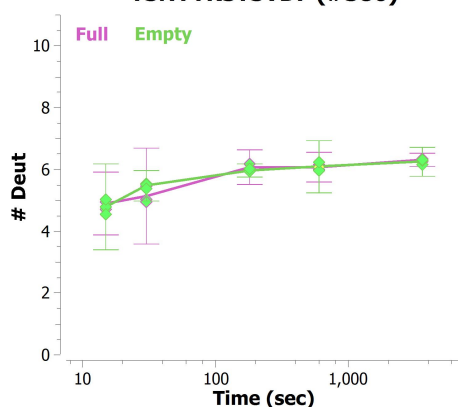

**AAV8\_VP1 707-714: YYKSTSD  
(#381)**

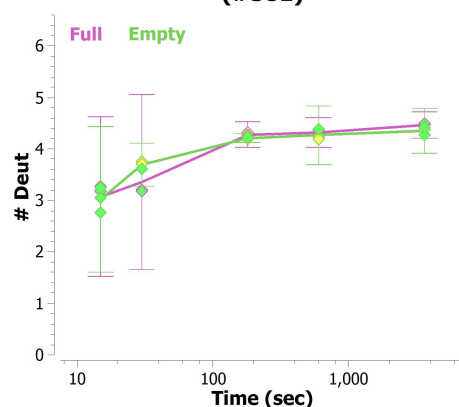

**AAV8\_VP1 707-715: YYKSTSVDF  
(#382)**

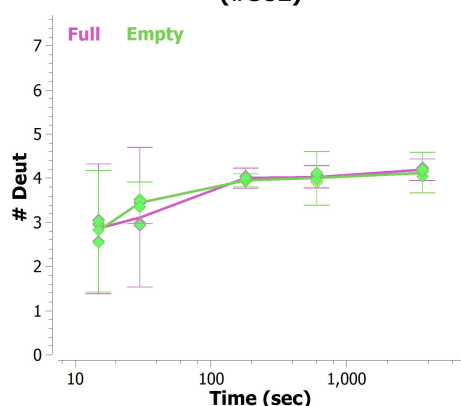

**AAV8\_VP1 708-715: YKSTSVDF  
(#383)**

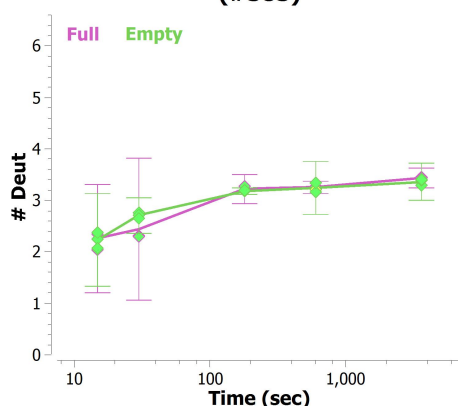

**AAV8\_VP1 715-722: FAVNTEGV  
(#384)**

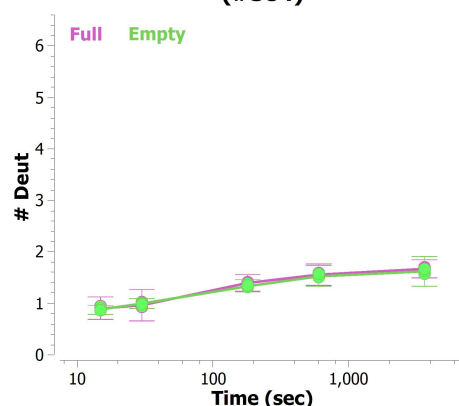

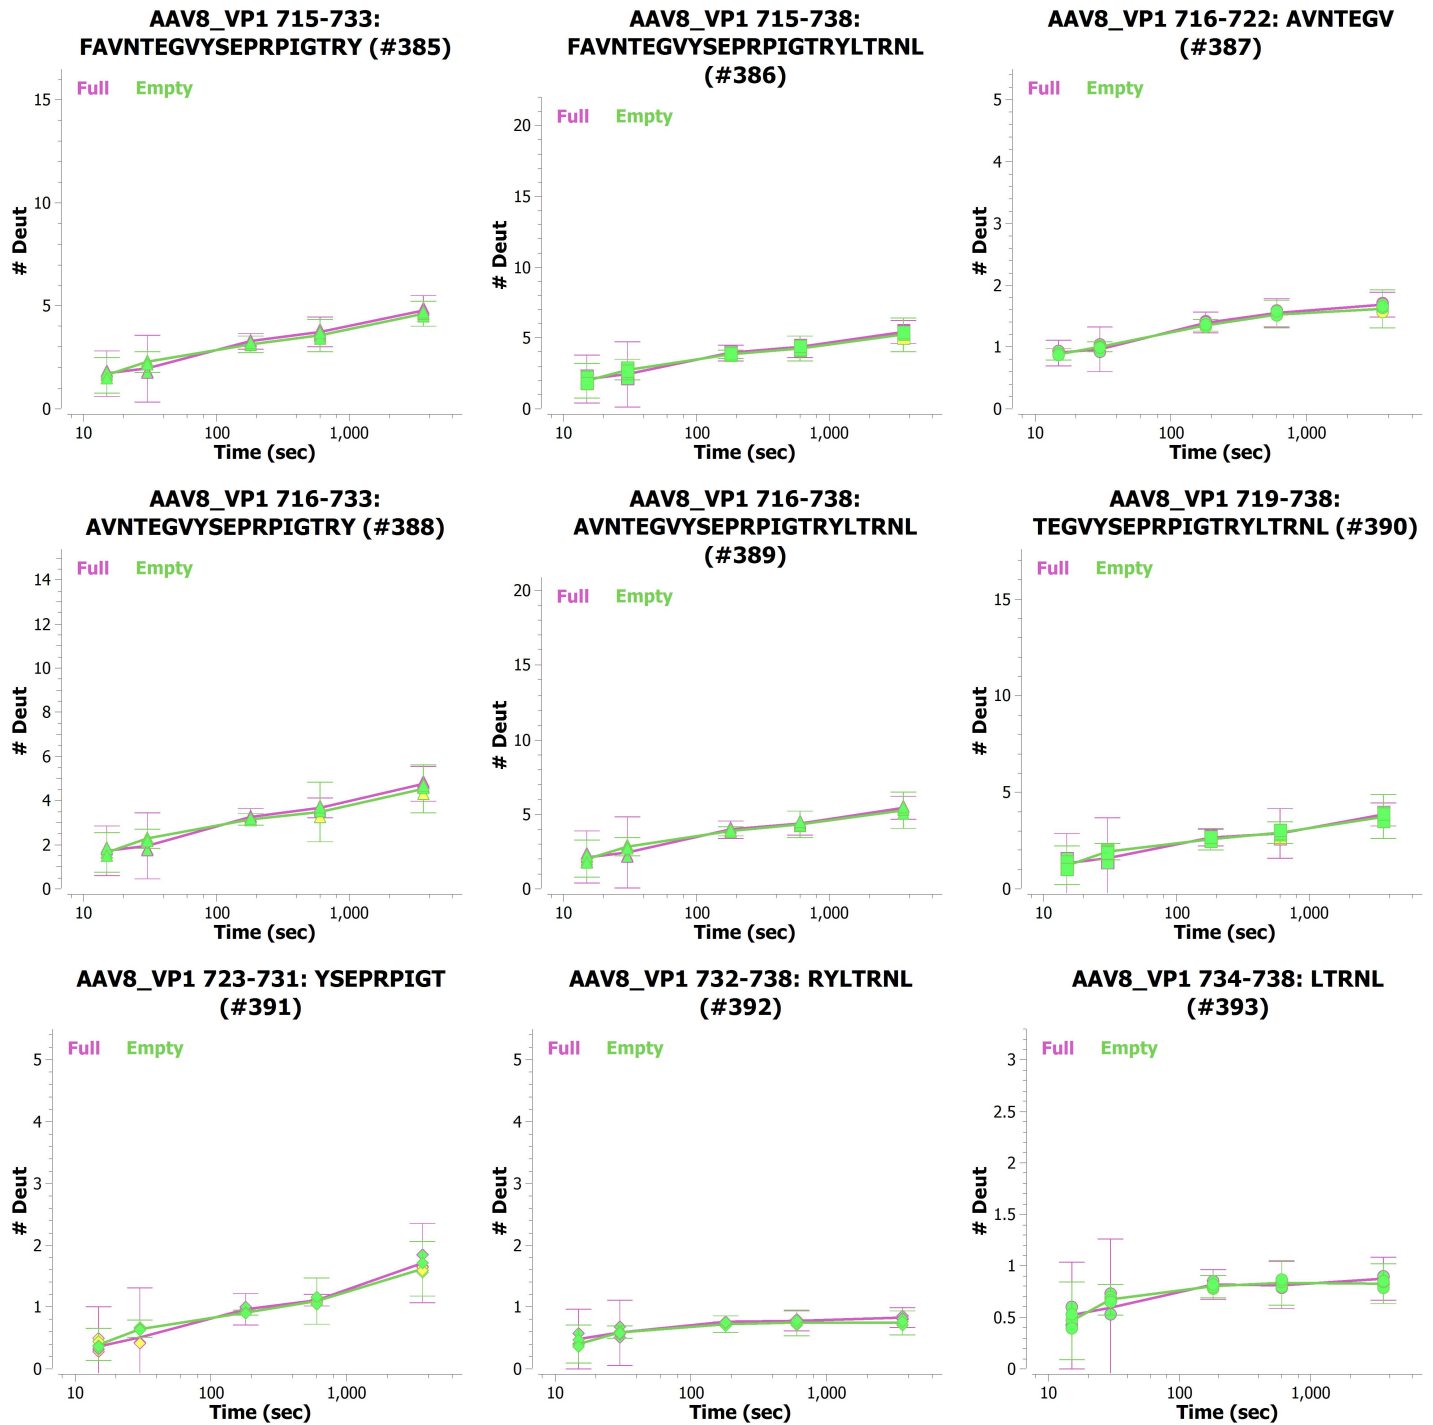

Supplementary Figure S7. Deuterium uptake plots of all peptides without any post translational modification except VP1 N-terminal peptides at a labeling temperature of 20 °C. Purple colored plots represents full capsid, and green colored plots represents empty capsid. Error bars representing standard deviation for each triplicate measurement are displayed.
